# Supplementary material for: Residual Expression of Reprogramming Factors Affects the Transcriptional Program and Epigenetic Signatures of Induced Pluripotent Stem Cells
Source: PLoS One. 2012 Dec 14;7(12):e51711. doi: 10.1371/journal.pone.0051711 (PMC3522693; doi:10.1371/journal.pone.0051711)
Supplement: Table S1 — Differentially expressed probesets in pre-Cre and post-Cre iPSCs (FDR-adjusted p-value <0.01). (XLSX) [file pone.0051711.s004.xlsx]

## Sheet: cre.frame.csv
Probe Set ID	Cluster ID	Gene.Symbol	B-Cre	C-Cre	D-Cre	E-Cre	F-Cre	B	C	D	E	F	5-Cre	6-Cre	10-Cre	11-Cre	15-Cre	5	6	10	11	15	ESC 1	ESC 2	ESC 3	ESC 4	ESC 5	p.cre.fdr	mRNA.Accession	mRNA..Source	mRna...Description	mRNA...xhyb	GO.Biological.Process.ID	GO.Biological.Process.Term	GO.Cellular.Component.ID	GO.Cellular.Component.Term	GO.Molecular.Function.ID	GO.Molecular.Function.Term	Pathway.Source	Pathway.Name
10606837	2263	Nxf3	-0.518184	-0.225645	-0.770002	-0.789587	-0.628537	0.901887	1.1456	1.38914	1.26602	1.01727	-0.9917	-0.604062	-0.748479	-0.660671	-0.699702	1.07896	1.08394	1.35832	1.24605	1.24129	-1.03322	-0.839753	-0.917605	-1.12824	-1.17309	1.22157e-09	NM_001024141	RefSeq	Mus musculus nuclear RNA export factor 3 (Nxf3), mRNA.	FALSE	GO:0016973	poly(A)+ mRNA export from nucleus	GO:0005737	cytoplasm	GO:0003729 // GO:0005515	mRNA binding // protein binding	---	---
10530819	2302	Hopx	-0.587097	-0.748021	-0.642074	-0.66769	-0.4279	1.22835	1.5249	1.62326	1.48624	1.32341	-1.0509	-1.03254	-0.95961	-0.719896	-0.909108	0.43338	0.90671	1.06627	0.669523	1.27501	-0.552281	-0.659094	-0.831522	-0.813968	-0.935352	2.53747e-09	NM_175606	RefSeq	Mus musculus HOP homeobox (Hopx), mRNA.	FALSE	GO:0000122 // GO:0000122 // GO:0001829 // GO:0001829 // GO:0006350 // GO:0006355 // GO:0007275 // GO:0007507 // GO:0008016 // GO:0016575 // GO:0043415 // GO:0045449 // GO:0045596 // GO:0048286 // GO:0051155	negative regulation of transcription from RNA polymerase II promoter // negative regulation of transcription from RNA polymerase II promoter // trophectodermal cell differentiation // trophectodermal cell differentiation // transcription // regulation of transcription, DNA-dependent // multicellular organismal development // heart development // regulation of heart contraction // histone deacetyl…	GO:0005634 // GO:0005634 // GO:0005737	nucleus // nucleus // cytoplasm	GO:0003677 // GO:0003700 // GO:0005515 // GO:0016564 // GO:0043565	DNA binding // transcription factor activity // protein binding // transcription repressor activity // sequence-specific DNA binding	---	---
10607865	1820	Tmsb4x	-0.525752	-0.403578	-0.739421	-0.581379	-0.790827	0.792374	1.0101	1.14167	1.43616	1.38341	-0.848913	-0.406592	-0.968366	-0.80861	-1.15573	0.959472	1.46787	1.07946	0.686718	1.51366	-1.37704	-0.965317	-0.310916	-1.039	-0.549456	1.77724e-07	NM_021278	RefSeq	Mus musculus thymosin, beta 4, X chromosome (Tmsb4x), mRNA.	FALSE	GO:0007010 // GO:0030036 // GO:0030334 // GO:0042989	cytoskeleton organization // actin cytoskeleton organization // regulation of cell migration // sequestering of actin monomers	GO:0005634 // GO:0005737 // GO:0005829 // GO:0005856	nucleus // cytoplasm // cytosol // cytoskeleton	GO:0003779 // GO:0005515	actin binding // protein binding	---	---
10438592	2047	Liph	-1.02712	-0.777226	-0.522155	-1.07995	-0.337337	0.926706	1.22379	1.57118	1.21024	0.962372	-1.18739	-1.06475	-0.811689	-1.90824	-1.0498	0.971362	0.562817	0.923504	0.548509	0.926736	1.15085	0.0681922	-0.310018	-0.96348	-0.00709773	3.64368e-07	NM_001083894	RefSeq	Mus musculus lipase, member H (Liph), transcript variant 1, mRNA.	FALSE	GO:0006629 // GO:0016042	lipid metabolic process // lipid catabolic process	GO:0005576 // GO:0016020	extracellular region // membrane	GO:0003824 // GO:0016787	catalytic activity // hydrolase activity	GenMAPP	Statin_Pathway_PharmGKB
10431915	174	Slc38a4	0.329773	0.816879	0.479132	0.496881	0.579344	-1.37257	-1.07357	-0.863875	-1.30814	-1.22437	0.170074	0.634822	0.607529	0.519894	0.742209	-0.76367	-0.821918	-1.08048	-1.0303	-1.78014	1.23421	1.31758	1.28372	0.972661	1.13433	3.64368e-07	NM_027052	RefSeq	Mus musculus solute carrier family 38, member 4 (Slc38a4), mRNA.	FALSE	GO:0006810 // GO:0006811 // GO:0006814 // GO:0006865	transport // ion transport // sodium ion transport // amino acid transport	GO:0005886 // GO:0016020 // GO:0016021	plasma membrane // membrane // integral to membrane	GO:0015293 // GO:0031402	symporter activity // sodium ion binding	---	---
10510260	1695	Nppb	-0.524529	-0.761423	-0.709424	-0.461057	-0.553204	0.723277	1.0837	1.25786	1.60849	1.37752	-0.285345	-0.708085	-0.342924	-0.584084	-0.585286	0.615562	1.30784	1.04316	0.818907	1.48026	-1.05253	-1.07592	-1.44977	-1.33188	-0.891116	4.00865e-07	NM_008726	RefSeq	Mus musculus natriuretic peptide precursor type B (Nppb), mRNA.	FALSE	GO:0050880	regulation of blood vessel size	GO:0005576	extracellular region	GO:0005179	hormone activity	---	---
10454782	1375	Egr1	-1.27202	-1.2793	-1.36	-1.50836	-1.34336	0.881312	1.02538	0.87801	0.362516	0.477365	-0.502378	-0.728692	-1.15223	-1.11105	-0.252343	0.730507	1.11088	1.10112	0.544878	1.50395	0.690483	-0.289845	-0.536409	1.04292	0.986646	5.47012e-07	NM_007913	RefSeq	Mus musculus early growth response 1 (Egr1), mRNA.	FALSE	GO:0000122 // GO:0006350 // GO:0006355 // GO:0030217	negative regulation of transcription from RNA polymerase II promoter // transcription // regulation of transcription, DNA-dependent // T cell differentiation	GO:0005622 // GO:0005634 // GO:0005634	intracellular // nucleus // nucleus	GO:0003676 // GO:0003677 // GO:0003700 // GO:0008270 // GO:0046872	nucleic acid binding // DNA binding // transcription factor activity // zinc ion binding // metal ion binding	GenMAPP	Ovarian_Infertility_Genes
10450930	2304	Crisp1	-0.929949	-1.22655	-0.615175	-0.740606	-0.965095	0.954687	1.3501	1.3519	1.47088	0.957642	-1.10647	-0.670067	-0.536065	-1.11688	-0.997336	0.490056	1.19927	1.48423	0.342943	1.49898	-0.16007	-0.509142	-0.211857	-1.15092	-0.16451	9.54828e-07	NM_009638	RefSeq	Mus musculus cysteine-rich secretory protein 1 (Crisp1), mRNA.	FALSE	---	---	GO:0005576	extracellular region	---	---	---	---
10587880	1693	Pcolce2	-0.898203	-0.774324	-0.727739	-0.733724	-0.954708	1.10605	0.902552	1.25087	1.58017	1.38461	-0.762419	-0.747123	-0.99712	-0.389259	-0.24618	0.856709	1.19744	1.1174	0.380169	1.62752	-0.932574	-0.806839	-0.292378	-1.33884	-0.802053	9.54828e-07	NM_029620	RefSeq	Mus musculus procollagen C-endopeptidase enhancer 2 (Pcolce2), mRNA.	FALSE	---	---	GO:0005576	extracellular region	GO:0005515 // GO:0008201	protein binding // heparin binding	---	---
10416175	2012	Nefl	-0.551843	-1.22242	-0.693532	-0.920972	-0.853019	0.83332	0.828903	0.423764	0.954718	0.641335	-1.36635	-0.825898	-1.35046	-1.34426	-0.974932	1.05659	1.69711	1.22845	0.766367	1.51119	-0.637472	0.0108666	1.11021	-0.337947	0.0162888	1.17989e-06	NM_010910	RefSeq	Mus musculus neurofilament, light polypeptide (Nefl), mRNA.	FALSE	GO:0000226 // GO:0014012 // GO:0031133 // GO:0040011 // GO:0043524 // GO:0045109 // GO:0045110 // GO:0048812 // GO:0050772 // GO:0050885 // GO:0060052 // GO:0060052	microtubule cytoskeleton organization // axon regeneration in the peripheral nervous system // regulation of axon diameter // locomotion // negative regulation of neuron apoptosis // intermediate filament organization // intermediate filament bundle assembly // neurite morphogenesis // positive regulation of axonogenesis // neuromuscular process controlling balance // neurofilament cytoskeleton o…	GO:0005882 // GO:0005883 // GO:0030424	intermediate filament // neurofilament // axon	GO:0005198 // GO:0005515	structural molecule activity // protein binding	---	---
10505705	1838	Sh3gl2	-1.11743	-1.43271	-0.976369	-1.21579	-0.711931	0.971955	1.05837	1.1787	1.23763	1.13128	-0.450793	-1.43233	-1.14818	-1.08722	-0.557692	0.517915	1.70846	0.927366	0.454752	1.38246	-0.218988	-0.167022	0.0710713	-0.357479	0.233976	1.28776e-06	NM_019535	RefSeq	Mus musculus SH3-domain GRB2-like 2 (Sh3gl2), mRNA.	FALSE	GO:0006897	endocytosis	GO:0005737 // GO:0016020	cytoplasm // membrane	GO:0005515 // GO:0008289	protein binding // lipid binding	---	---
10603860	2265	Cfp	-0.476343	-0.867993	-0.76887	-0.693407	-0.550479	0.773873	0.758207	1.47587	1.62008	1.63225	-0.791723	-0.626044	-0.746766	-0.497185	-0.530195	0.93631	0.69365	1.37843	0.550879	1.54993	-0.889455	-1.3247	-1.07183	-0.945212	-0.589274	1.41554e-06	NM_008823	RefSeq	Mus musculus complement factor properdin (Cfp), mRNA.	FALSE	GO:0006955 // GO:0006957 // GO:0045087	immune response // complement activation, alternative pathway // innate immune response	GO:0005576	extracellular region	---	---	GenMAPP	MAPK_Cascade
10603768	2264	Efhc2	-0.529976	-0.900404	-0.20216	-0.23621	-0.280567	0.532685	0.981021	1.42418	1.1794	1.10073	-1.28777	-1.16392	-0.681745	-0.634722	-1.03945	1.08296	1.13747	1.39525	1.4564	1.12133	-0.808529	-1.02155	-0.75728	-1.14466	-0.722463	1.41554e-06	NM_028916	RefSeq	Mus musculus EF-hand domain (C-terminal) containing 2 (Efhc2), mRNA.	FALSE	---	---	---	---	GO:0005509	calcium ion binding	---	---
10522186	1821	Chrna9	-0.393174	-0.533362	-0.816352	-0.703049	-0.751159	0.724539	0.643871	1.42744	1.558	1.75525	-0.641234	-0.671662	-1.17198	-0.927555	-1.33498	0.566682	1.38432	1.10373	0.798271	1.38693	-0.613901	-0.868328	-0.625307	-0.863882	-0.433103	1.41554e-06	NM_001081104	RefSeq	Mus musculus cholinergic receptor, nicotinic, alpha polypeptide 9 (Chrna9), mRNA.	FALSE	GO:0006812 // GO:0042472 // GO:0050910	cation transport // inner ear morphogenesis // detection of mechanical stimulus involved in sensory perception of sound	GO:0016020 // GO:0016021	membrane // integral to membrane	GO:0004872 // GO:0004889	receptor activity // nicotinic acetylcholine-activated cation-selective channel activity	---	---
10599858	2300	4933402E13Rik	-1.15714	-0.481952	-0.740695	-0.734461	-0.950321	0.478955	1.17629	1.42961	1.59314	1.77913	-0.714918	-0.958092	-0.749348	-0.684871	-0.794333	0.514237	1.07381	1.14647	0.616678	1.5032	-0.703609	-0.483592	-0.541991	-1.18639	-0.429807	1.53031e-06	BC132156	GenBank	Mus musculus RIKEN cDNA 4933402E13 gene, mRNA (cDNA clone MGC:163787 IMAGE:40130433), complete cds.	FALSE	---	---	---	---	---	---	---	---
10347036	1930	Mtap2	-0.921776	-0.411849	-1.09605	-0.961939	-0.920393	0.912421	0.887242	1.13985	1.08458	1.18928	-0.541593	-0.70944	-1.72082	-1.13497	-1.19866	0.682069	1.46645	1.32886	0.484198	1.73836	-0.411995	-0.184214	-0.262782	-0.283439	-0.153377	1.53031e-06	NM_001039934	RefSeq	Mus musculus microtubule-associated protein 2 (Mtap2), transcript variant 1, mRNA.	FALSE	GO:0001578 // GO:0007026 // GO:0016358 // GO:0018107	microtubule bundle formation // negative regulation of microtubule depolymerization // dendrite development // peptidyl-threonine phosphorylation	GO:0005622 // GO:0005737 // GO:0005874 // GO:0005875 // GO:0030425 // GO:0043025 // GO:0043198	intracellular // cytoplasm // microtubule // microtubule associated complex // dendrite // cell soma // dendritic shaft	GO:0005515 // GO:0005516 // GO:0005519	protein binding // calmodulin binding // cytoskeletal regulatory protein binding	---	---
10564818	552	Anpep	0.107038	0.594023	0.473144	0.265833	0.615161	-0.961572	-1.37329	-0.959337	-1.20532	-0.886052	1.32223	0.812635	1.57957	0.834448	1.2148	-1.61843	-0.790139	-0.792664	-1.27474	-0.952646	1.21718	0.556424	-0.406895	1.15411	0.474496	1.53031e-06	NM_008486	RefSeq	Mus musculus alanyl (membrane) aminopeptidase (Anpep), mRNA.	FALSE	GO:0001525 // GO:0006508 // GO:0007275 // GO:0030154	angiogenesis // proteolysis // multicellular organismal development // cell differentiation	GO:0016020 // GO:0016021	membrane // integral to membrane	GO:0004177 // GO:0008233 // GO:0008237 // GO:0008270 // GO:0016787 // GO:0046872	aminopeptidase activity // peptidase activity // metallopeptidase activity // zinc ion binding // hydrolase activity // metal ion binding	---	---
10430956	1484	Cyb5r3	-0.839796	-0.198799	-0.517899	-0.730046	-0.32567	0.619626	0.977235	1.85123	0.973392	1.2587	-0.501623	-0.252796	-0.665507	-0.491925	-0.611392	1.1073	1.56566	0.835411	0.975866	0.961686	-0.866692	-1.25848	-1.48379	-1.03165	-1.35004	1.60773e-06	NM_029787	RefSeq	Mus musculus cytochrome b5 reductase 3 (Cyb5r3), mRNA.	FALSE	GO:0006694 // GO:0006695 // GO:0008610 // GO:0016126 // GO:0055114	steroid biosynthetic process // cholesterol biosynthetic process // lipid biosynthetic process // sterol biosynthetic process // oxidation reduction	GO:0005625 // GO:0005737 // GO:0005739 // GO:0005741 // GO:0005743 // GO:0005783 // GO:0016020	soluble fraction // cytoplasm // mitochondrion // mitochondrial outer membrane // mitochondrial inner membrane // endoplasmic reticulum // membrane	GO:0004128 // GO:0009055 // GO:0016491	cytochrome-b5 reductase activity // electron carrier activity // oxidoreductase activity	---	---
10374934	2319	Psme4	-1.19082	-1.12505	-0.595678	-1.05806	-1.10912	0.559567	1.21468	1.59484	1.03569	1.25716	-0.960186	-0.918497	-0.526207	-0.656763	-0.257462	0.316886	1.31704	1.25922	0.940093	1.57149	0.19761	-0.456915	-0.993878	-0.901218	-0.514422	1.74703e-06	NM_134013	RefSeq	Mus musculus proteasome (prosome, macropain) activator subunit 4 (Psme4), mRNA.	FALSE	GO:0007275 // GO:0007283 // GO:0030154	multicellular organismal development // spermatogenesis // cell differentiation	GO:0005634 // GO:0005829 // GO:0043234	nucleus // cytosol // protein complex	---	---	---	---
10544525	1741	Pdia4	-0.604483	-0.567785	-0.725921	-0.316967	0.027473	0.70853	0.500164	1.04921	1.0363	0.795965	-0.398028	-0.0845423	-0.591005	-0.509846	-0.956563	1.11349	0.784833	1.21285	1.11329	1.14009	-3.29852	-0.37624	-0.102128	-0.270052	-0.680115	1.74703e-06	NM_009787	RefSeq	Mus musculus protein disulfide isomerase associated 4 (Pdia4), mRNA.	FALSE	GO:0045454	cell redox homeostasis	GO:0005783 // GO:0005788	endoplasmic reticulum // endoplasmic reticulum lumen	GO:0003756 // GO:0005515 // GO:0016853	protein disulfide isomerase activity // protein binding // isomerase activity	---	---
10585186	1704	1600029D21Rik	-1.17405	-0.0566072	-0.714742	-0.948816	-0.819801	0.931471	1.12327	1.27719	1.56972	1.49687	-0.796135	-1.03255	-0.546023	-0.766214	-0.13936	0.824996	1.26822	0.84795	0.543814	1.38469	-0.314287	-0.699412	-1.0356	-1.34619	-0.878397	2.08404e-06	NM_029639	RefSeq	Mus musculus RIKEN cDNA 1600029D21 gene (1600029D21Rik), mRNA.	FALSE	---	---	GO:0016020 // GO:0016021	membrane // integral to membrane	---	---	---	---
10562847	1587	Nr1h2	-0.0821701	-0.399651	-0.115027	-0.208978	0.355567	1.23813	1.42233	1.59452	1.37465	1.42291	-0.996946	-0.740356	-0.395954	-1.11843	-1.17069	0.724191	-0.0447176	0.936133	0.931296	0.818647	-1.28467	-0.969111	-0.778476	-1.36425	-1.14896	2.08404e-06	NM_009473	RefSeq	Mus musculus nuclear receptor subfamily 1, group H, member 2 (Nr1h2), mRNA.	FALSE	GO:0006350 // GO:0006355 // GO:0044255	transcription // regulation of transcription, DNA-dependent // cellular lipid metabolic process	GO:0005634	nucleus	GO:0003677 // GO:0003700 // GO:0003707 // GO:0004872 // GO:0004879 // GO:0008270 // GO:0043565 // GO:0046872	DNA binding // transcription factor activity // steroid hormone receptor activity // receptor activity // ligand-dependent nuclear receptor activity // zinc ion binding // sequence-specific DNA binding // metal ion binding	GenMAPP	Nuclear_Receptors
10454198	1531	Rnf125	-0.510627	-0.489769	-0.577294	-0.292686	-0.266711	1.0241	0.777548	1.08677	1.44213	0.993358	-0.850704	-0.632721	-0.953889	-0.413558	-0.548292	0.299621	1.44963	0.846192	1.37542	1.53007	-0.00167051	-0.815723	-1.59972	-1.67599	-1.19548	2.08404e-06	NM_026301	RefSeq	Mus musculus ring finger protein 125 (Rnf125), mRNA.	FALSE	GO:0006511 // GO:0006955	ubiquitin-dependent protein catabolic process // immune response	GO:0005622	intracellular	GO:0005515 // GO:0008270 // GO:0016874 // GO:0046872	protein binding // zinc ion binding // ligase activity // metal ion binding	---	---
10391103	1211	Jup	-1.3774	-0.991124	-0.704039	-0.963135	-0.764447	0.892374	0.823513	1.40103	0.756627	1.14741	-0.265869	-1.26137	-0.886741	-0.875866	-1.73385	0.743906	0.756627	1.44403	0.639961	1.5754	-0.172312	-0.186916	0.373012	-0.956721	0.58589	2.08404e-06	NM_010593	RefSeq	Mus musculus junction plakoglobin (Jup), mRNA.	FALSE	GO:0007155	cell adhesion	GO:0005737 // GO:0005829 // GO:0005856 // GO:0005911 // GO:0005913 // GO:0016020 // GO:0030018 // GO:0030054 // GO:0030057	cytoplasm // cytosol // cytoskeleton // cell-cell junction // cell-cell adherens junction // membrane // Z disc // cell junction // desmosome	GO:0005488 // GO:0005515 // GO:0042153	binding // protein binding // RPTP-like protein binding	---	---
10603708	1818	Cask	-0.663391	-1.26823	-0.301723	-0.527019	-0.437466	0.978303	1.25713	1.30299	1.04977	1.21858	-1.2785	-0.145908	-0.812989	-0.767867	-0.431742	0.709917	1.24469	1.18655	0.699041	1.72111	-1.0789	-1.02397	-0.809533	-0.771276	-1.04956	2.36121e-06	NM_009806	RefSeq	Mus musculus calcium/calmodulin-dependent serine protein kinase (MAGUK family) (Cask), mRNA.	FALSE	GO:0006468 // GO:0045944	protein amino acid phosphorylation // positive regulation of transcription from RNA polymerase II promoter	GO:0005634 // GO:0005737 // GO:0005829 // GO:0005886 // GO:0016020 // GO:0016323 // GO:0019717 // GO:0045202	nucleus // cytoplasm // cytosol // plasma membrane // membrane // basolateral plasma membrane // synaptosome // synapse	GO:0000166 // GO:0004672 // GO:0004674 // GO:0005515 // GO:0005516 // GO:0005524 // GO:0016301 // GO:0016740	nucleotide binding // protein kinase activity // protein serine/threonine kinase activity // protein binding // calmodulin binding // ATP binding // kinase activity // transferase activity	---	---
10556764	441	Ppp1cc	0.463744	0.727337	0.802553	0.49367	0.876234	-0.992963	-0.683946	-1.45836	-0.936717	-1.44159	1.16307	0.951584	0.611439	0.758065	1.25339	-0.371589	-1.75702	-0.830505	-0.92496	-1.72863	0.393537	0.835085	0.1411	1.20542	0.45005	2.69742e-06	NM_013636	RefSeq	Mus musculus protein phosphatase 1, catalytic subunit, gamma isoform (Ppp1cc), mRNA.	FALSE	GO:0005975 // GO:0005977 // GO:0006470 // GO:0007049 // GO:0051301	carbohydrate metabolic process // glycogen metabolic process // protein amino acid dephosphorylation // cell cycle // cell division	GO:0005634 // GO:0005737 // GO:0005739 // GO:0005741	nucleus // cytoplasm // mitochondrion // mitochondrial outer membrane	GO:0004721 // GO:0004722 // GO:0004722 // GO:0005506 // GO:0005515 // GO:0016787 // GO:0030145 // GO:0042802 // GO:0046872	phosphoprotein phosphatase activity // protein serine/threonine phosphatase activity // protein serine/threonine phosphatase activity // iron ion binding // protein binding // hydrolase activity // manganese ion binding // identical protein binding // metal ion binding	---	---
10601771	1662	Armcx1	-0.621592	-1.07712	-0.556039	-0.606369	-0.787532	0.935132	0.713048	0.820922	1.38866	1.33749	-0.643241	-0.361404	-0.357776	-0.044695	0.102034	0.481376	1.27405	1.10854	1.23032	1.536	-1.2239	-1.29298	-1.6325	-0.40157	-1.32086	3.26544e-06	NM_030066	RefSeq	Mus musculus armadillo repeat containing, X-linked 1 (Armcx1), mRNA.	FALSE	---	---	GO:0016020 // GO:0016021	membrane // integral to membrane	GO:0005488	binding	---	---
10606235	1661	Zdhhc15	-0.638333	-0.573074	-0.401032	-0.59261	-0.493327	0.757581	1.30258	0.879505	1.45497	1.72869	-0.448263	-0.467869	-0.189785	-0.0832092	-0.417579	0.516295	1.2955	1.01197	0.669776	1.19611	-1.338	-1.2374	-1.27934	-0.881528	-1.77163	3.37286e-06	NM_175358	RefSeq	Mus musculus zinc finger, DHHC domain containing 15 (Zdhhc15), mRNA.	FALSE	GO:0016188 // GO:0016188 // GO:0018345 // GO:0045184	synaptic vesicle maturation // synaptic vesicle maturation // protein palmitoylation // establishment of protein localization	GO:0016020 // GO:0016021	membrane // integral to membrane	GO:0008270 // GO:0008415 // GO:0016409 // GO:0016740 // GO:0046872	zinc ion binding // acyltransferase activity // palmitoyltransferase activity // transferase activity // metal ion binding	---	---
10559373	1315	Fgf15	-0.115389	-0.813182	-0.247463	-0.136042	-0.282837	1.30267	1.50728	1.5826	0.963045	1.36821	-1.29654	-0.652123	-1.05931	-1.65244	-1.63761	0.407762	0.196057	0.933449	0.764911	1.43347	-0.746248	-0.566647	-0.471938	-0.136042	-0.645637	3.42359e-06	NM_008003	RefSeq	Mus musculus fibroblast growth factor 15 (Fgf15), mRNA.	FALSE	GO:0001755 // GO:0007507	neural crest cell migration // heart development	GO:0005576	extracellular region	GO:0008083	growth factor activity	---	---
10455967	2289	2610318N02Rik	-0.718064	-1.5153	-0.630101	-0.714692	-0.509857	0.994752	1.03791	1.63152	1.48404	1.47257	-1.00618	-0.673908	-1.17527	-1.03819	-1.54023	0.319842	0.826257	0.714436	0.311885	1.73863	-0.218295	-0.232983	-0.212081	-0.189669	-0.157031	3.42785e-06	ENSMUST00000093336	ENSEMBL	MCG131172, isoform CRA_a gene:ENSMUSG00000049916	FALSE	---	---	---	---	---	---	---	---
10434698	2130	Fetub	-0.921907	-0.688686	-0.520937	-0.518475	-0.321922	0.738115	1.00597	1.56481	1.53772	1.31819	-1.37274	-0.298617	-0.418237	-1.15057	-0.378286	1.04391	1.08251	0.935382	0.508398	1.51616	-0.857271	-1.12098	-0.66897	-1.27974	-0.733819	3.42785e-06	NM_021564	RefSeq	Mus musculus fetuin beta (Fetub), transcript variant 1, mRNA.	FALSE	---	---	GO:0005576	extracellular region	GO:0004869	cysteine protease inhibitor activity	---	---
10416006	1596	Gm600	-0.378619	-1.04988	-0.243777	-0.884247	-0.906974	1.40768	1.59579	1.91416	1.10786	1.01936	-0.611047	-0.6445	-0.604808	-1.14494	-1.03434	1.25467	0.223763	0.539439	0.793751	1.32222	-0.593316	-0.703064	-0.970488	-0.810794	-0.597893	3.42785e-06	ENSMUST00000079469	ENSEMBL	similar to hCG17291 gene:ENSMUSG00000061356	FALSE	---	---	---	---	---	---	---	---
10351867	1228	Aim2	-1.0282	-0.56342	-1.02987	-1.29691	-1.15758	0.679457	0.872948	1.39677	1.0884	0.726349	-1.4224	-0.752799	-0.735024	-1.94328	-1.26009	0.187229	0.911565	0.805278	0.0265828	1.04388	0.39658	0.696913	0.913604	0.587031	0.856996	3.42785e-06	NM_001013779	RefSeq	Mus musculus absent in melanoma 2 (Aim2), mRNA.	FALSE	---	---	GO:0005634	nucleus	GO:0005515	protein binding	---	---
10365428	1152	Btbd11	0.93267	2.15088	1.13258	1.19174	1.16901	-0.524275	-0.959359	-1.28604	-0.656766	-0.279258	0.982486	0.165012	0.379977	0.872215	1.09403	-0.988184	-1.02289	-1.09722	-0.719009	-1.45574	0.903579	-0.197166	-0.24418	-0.696774	-0.847315	3.42785e-06	NM_028709	RefSeq	Mus musculus BTB (POZ) domain containing 11 (Btbd11), transcript variant 1, mRNA.	FALSE	---	---	GO:0016020 // GO:0016021	membrane // integral to membrane	GO:0003677 // GO:0005515	DNA binding // protein binding	---	---
10405464	2288	Grk6	-0.860261	-1.33154	-0.920232	-0.817186	-0.714158	1.40151	1.44306	1.33339	1.5122	1.73897	-0.277232	-0.698764	-1.27912	-0.985876	-1.13444	0.0991307	0.656261	0.867416	0.355136	1.29229	0.0490651	-0.430421	-0.397411	-0.200358	-0.701426	3.59781e-06	NM_001038018	RefSeq	Mus musculus G protein-coupled receptor kinase 6 (Grk6), transcript variant 1, mRNA.	FALSE	GO:0006468 // GO:0007165	protein amino acid phosphorylation // signal transduction	GO:0016020	membrane	GO:0000166 // GO:0004672 // GO:0004674 // GO:0004703 // GO:0004871 // GO:0004872 // GO:0005524 // GO:0016301 // GO:0016740	nucleotide binding // protein kinase activity // protein serine/threonine kinase activity // G-protein coupled receptor kinase activity // signal transducer activity // receptor activity // ATP binding // kinase activity // transferase activity	GenMAPP // GenMAPP	Calcium_regulation_in_cardiac_cells // Smooth_muscle_contraction
10366163	2011	Slc6a15	-0.774101	-1.49466	-0.882787	-1.25041	-0.658841	0.868956	0.699859	1.11377	1.50712	1.69436	-1.7318	-0.606214	-1.24998	-1.34415	-0.587048	0.169323	1.11691	0.741059	0.566463	0.921972	-0.148882	0.0639606	0.651466	0.459467	0.154175	3.75879e-06	NM_175328	RefSeq	Mus musculus solute carrier family 6 (neurotransmitter transporter), member 15 (Slc6a15), mRNA.	FALSE	GO:0006810 // GO:0006836	transport // neurotransmitter transport	GO:0005887 // GO:0016020 // GO:0016021	integral to plasma membrane // membrane // integral to membrane	GO:0005328 // GO:0015293	neurotransmitter:sodium symporter activity // symporter activity	---	---
10525352	440	Ppp1cc	0.5285	0.609692	0.78907	0.594824	0.954813	-0.920568	-0.75599	-1.49125	-0.9662	-1.52921	1.16297	0.986262	0.557345	0.797429	1.22258	-0.252184	-1.83794	-0.867878	-0.764281	-1.66871	0.328087	0.781807	0.156794	1.1222	0.461833	3.95573e-06	NM_013636	RefSeq	Mus musculus protein phosphatase 1, catalytic subunit, gamma isoform (Ppp1cc), mRNA.	FALSE	GO:0005975 // GO:0005977 // GO:0006470 // GO:0007049 // GO:0051301	carbohydrate metabolic process // glycogen metabolic process // protein amino acid dephosphorylation // cell cycle // cell division	GO:0005634 // GO:0005737 // GO:0005739 // GO:0005741	nucleus // cytoplasm // mitochondrion // mitochondrial outer membrane	GO:0004721 // GO:0004722 // GO:0004722 // GO:0005506 // GO:0005515 // GO:0016787 // GO:0030145 // GO:0042802 // GO:0046872	phosphoprotein phosphatase activity // protein serine/threonine phosphatase activity // protein serine/threonine phosphatase activity // iron ion binding // protein binding // hydrolase activity // manganese ion binding // identical protein binding // metal ion binding	---	---
10496892	177	Fubp1	0.566784	0.4638	0.20446	0.692383	0.417109	-1.39117	-0.970118	-1.02467	-0.684824	-0.87952	0.206061	0.829325	0.533871	-0.332241	0.858132	-1.3353	-1.11638	-0.878754	-0.868873	-1.41894	1.12443	1.31899	0.52893	2.24981	0.906702	3.95573e-06	NM_057172	RefSeq	Mus musculus far upstream element (FUSE) binding protein 1 (Fubp1), mRNA.	FALSE	GO:0006350 // GO:0006355	transcription // regulation of transcription, DNA-dependent	GO:0005634	nucleus	GO:0003677 // GO:0003723	DNA binding // RNA binding	---	---
10453636	1696	Svil	-0.506078	-0.743425	-0.855434	-0.845188	-0.845362	0.804281	0.927999	1.66476	1.29997	1.2942	-0.750096	-0.684391	-0.630301	-0.0412031	-0.259095	0.390818	1.66369	1.20076	0.656631	1.28324	-0.758448	-0.786218	-1.30422	-1.39244	-0.784457	4.07362e-06	NM_153153	RefSeq	Mus musculus supervillin (Svil), transcript variant 1, mRNA.	FALSE	GO:0007010 // GO:0051016	cytoskeleton organization // barbed-end actin filament capping	GO:0005737 // GO:0005856 // GO:0005886 // GO:0016020	cytoplasm // cytoskeleton // plasma membrane // membrane	GO:0003779 // GO:0005509	actin binding // calcium ion binding	---	---
10547288	1144	Ankrd26	0.928536	0.971957	0.845352	0.670528	0.59185	-1.13942	-1.2213	0.0377435	-1.43949	-0.429797	1.50831	1.0568	1.57362	1.473	1.2223	-0.625061	-1.26435	-0.496538	-0.646723	-1.20865	-1.01011	-0.153318	-0.884209	0.0349547	-0.395984	4.17634e-06	NM_001081112	RefSeq	Mus musculus ankyrin repeat domain 26 (Ankrd26), mRNA.	FALSE	GO:0019216 // GO:0019217 // GO:0040015 // GO:0046621 // GO:0060259	regulation of lipid metabolic process // regulation of fatty acid metabolic process // negative regulation of multicellular organism growth // negative regulation of organ growth // regulation of feeding behavior	GO:0005884	actin filament	GO:0003674	molecular_function	---	---
10425822	2290	Pnpla3	-1.01239	-0.69202	-0.548076	-0.959996	-0.354605	0.771259	1.33876	0.984937	1.48477	1.9248	-0.485059	-0.739271	-0.841804	-0.411194	-0.807493	0.606541	0.612089	0.465775	1.2681	1.50653	-0.807325	-1.66881	-0.0851619	-0.566188	-0.984151	4.46092e-06	NM_054088	RefSeq	Mus musculus patatin-like phospholipase domain containing 3 (Pnpla3), mRNA.	FALSE	GO:0006629 // GO:0008150 // GO:0016042	lipid metabolic process // biological_process // lipid catabolic process	GO:0016020 // GO:0016021	membrane // integral to membrane	GO:0003674 // GO:0004806 // GO:0008415 // GO:0016740 // GO:0016787	molecular_function // triacylglycerol lipase activity // acyltransferase activity // transferase activity // hydrolase activity	---	---
10606979	244	Nup62cl	0.853231	0.304266	0.982568	0.713034	0.541326	-1.3483	-1.19872	-0.440723	-1.33547	-1.47397	0.453265	0.314236	1.18933	0.916066	1.07041	-0.554781	-1.24367	-0.546179	-0.734654	-1.53652	0.762155	0.843119	1.24029	-0.979207	1.20888	4.46092e-06	BC100367	GenBank	Mus musculus nucleoporin 62 C-terminal like, mRNA (cDNA clone IMAGE:30712876), partial cds.	FALSE	---	---	GO:0016020	membrane	---	---	---	---
10461723	2210	4632417K18Rik	-1.32931	-0.68702	-0.878003	-0.984198	-0.800776	1.23485	1.5148	1.09947	1.13501	0.956942	-0.16941	-1.08178	-0.48409	-1.30673	-0.28721	0.36429	0.949621	1.24405	0.683306	1.70319	-0.528781	-0.572361	-1.1039	0.343379	-1.01534	5.1368e-06	BC038020	GenBank	Mus musculus RIKEN cDNA 4632417K18 gene, mRNA (cDNA clone MGC:46762 IMAGE:3599082), complete cds.	FALSE	---	---	---	---	---	---	---	---
10436057	1530	Morc1	-0.757861	-0.00367656	-0.480992	-0.682801	-0.131448	0.510281	1.21097	1.96721	1.22239	1.06864	-0.99258	-0.89572	-0.778842	-0.781484	-0.713403	0.499724	1.29606	0.714523	0.789199	1.40196	0.186233	-1.04641	-1.29299	-1.63847	-0.670521	5.21718e-06	NM_010816	RefSeq	Mus musculus microrchidia 1 (Morc1), mRNA.	FALSE	GO:0007275 // GO:0007283 // GO:0030154	multicellular organismal development // spermatogenesis // cell differentiation	GO:0005634	nucleus	GO:0003674 // GO:0005524 // GO:0008270 // GO:0046872	molecular_function // ATP binding // zinc ion binding // metal ion binding	---	---
10594645	2296	Rab8b	-1.09363	-0.448523	-0.964847	-1.19727	-1.35639	0.524951	0.937323	1.72331	1.23215	1.43944	-1.01361	-0.711986	-0.936153	-0.908064	-0.781473	0.590434	1.45968	0.655215	0.312784	1.83772	-0.112713	-0.326674	-0.155109	-0.177519	-0.529045	5.44717e-06	NM_173413	RefSeq	Mus musculus RAB8B, member RAS oncogene family (Rab8b), mRNA.	FALSE	GO:0006810 // GO:0007264 // GO:0015031	transport // small GTPase mediated signal transduction // protein transport	GO:0005886 // GO:0016020	plasma membrane // membrane	GO:0000166 // GO:0005515 // GO:0005525	nucleotide binding // protein binding // GTP binding	---	---
10445293	2253	Pla2g7	-0.696635	-0.621538	-0.788116	-0.744798	-1.05083	0.435266	0.500112	1.14135	1.62973	1.49994	-0.625472	-0.464959	-0.783059	-0.608269	-1.06863	1.48412	1.79351	0.85453	0.438568	1.45965	-0.824293	-0.821086	-0.442153	-0.792364	-0.904574	5.44717e-06	NM_013737	RefSeq	Mus musculus phospholipase A2, group VII (platelet-activating factor acetylhydrolase, plasma) (Pla2g7), mRNA.	FALSE	GO:0006954 // GO:0016042	inflammatory response // lipid catabolic process	GO:0005576 // GO:0008247	extracellular region // 1-alkyl-2-acetylglycerophosphocholine esterase complex	GO:0003824 // GO:0003847 // GO:0016787	catalytic activity // 1-alkyl-2-acetylglycerophosphocholine esterase activity // hydrolase activity	---	---
10606876	1757	Morf4l2	0.236399	-0.832498	-0.109522	-0.274433	-0.331032	0.992451	0.875432	1.07574	1.60558	1.44183	-1.01727	-0.599149	-0.618506	-0.127345	-0.789086	1.15288	1.03239	1.19009	0.57261	0.607158	-1.77829	-1.47977	-0.542675	-1.53728	-0.745705	5.44717e-06	NM_019768	RefSeq	Mus musculus mortality factor 4 like 2 (Morf4l2), mRNA.	FALSE	GO:0001558 // GO:0006281 // GO:0006350 // GO:0006355 // GO:0006974 // GO:0016568	regulation of cell growth // DNA repair // transcription // regulation of transcription, DNA-dependent // response to DNA damage stimulus // chromatin modification	GO:0005634	nucleus	---	---	---	---
10599192	996	Lonrf3	1.04252	1.60637	0.961562	1.06354	1.1792	-0.611549	-0.615065	-0.44904	-0.332547	-0.632318	0.0244993	0.803257	1.72627	1.37566	1.36128	-0.65581	-0.857096	-0.70545	-0.499616	-0.368385	-0.841951	-1.16283	-1.17603	-0.94774	-1.28872	5.44717e-06	NM_028894	RefSeq	Mus musculus LON peptidase N-terminal domain and ring finger 3 (Lonrf3), mRNA.	FALSE	GO:0006510	ATP-dependent proteolysis	---	---	GO:0004176 // GO:0005488 // GO:0005515 // GO:0008270 // GO:0046872	ATP-dependent peptidase activity // binding // protein binding // zinc ion binding // metal ion binding	---	---
10588137	20	Dzip1l	0.437627	0.888672	0.932912	0.348534	0.370855	-1.23587	-1.27292	-1.25468	-1.96123	-1.586	0.696073	0.458178	1.24391	0.89302	1.49842	-0.149841	-0.304679	-0.42174	-0.756753	-1.26329	0.173293	0.214947	0.76857	1.52722	-0.245234	5.44717e-06	NM_028258	RefSeq	Mus musculus DAZ interacting protein 1-like (Dzip1l), mRNA.	FALSE	---	---	GO:0005622	intracellular	GO:0008270 // GO:0046872	zinc ion binding // metal ion binding	---	---
10399691	2311	Id2	-0.499827	-0.459021	-0.278291	-0.516052	-0.298065	0.818782	1.13689	1.27741	1.31675	1.31029	-1.84262	-0.172258	-0.97593	-0.948381	-1.27607	0.530455	1.4517	0.953915	0.758208	1.45211	-0.640809	-0.482672	-0.489865	-1.18415	-0.942493	5.88369e-06	NM_010496	RefSeq	Mus musculus inhibitor of DNA binding 2 (Id2), mRNA.	FALSE	GO:0000122 // GO:0007275 // GO:0007507 // GO:0043353 // GO:0045449 // GO:0045651 // GO:0048535	negative regulation of transcription from RNA polymerase II promoter // multicellular organismal development // heart development // enucleate erythrocyte differentiation // regulation of transcription // positive regulation of macrophage differentiation // lymph node development	GO:0005634 // GO:0005737	nucleus // cytoplasm	GO:0005515 // GO:0030528	protein binding // transcription regulator activity	---	---
10594758	2303	Gcnt3	-0.721895	-0.498081	-1.1171	-0.376259	-1.0736	1.04167	1.07224	1.7389	1.5901	1.16266	-0.5462	-0.989785	-0.961661	-0.648272	-0.863736	0.364955	0.859703	0.652701	0.603072	2.03093	-0.343117	-0.649481	-0.669284	-0.954572	-0.703882	6.09548e-06	NM_028087	RefSeq	Mus musculus glucosaminyl (N-acetyl) transferase 3, mucin type (Gcnt3), mRNA.	FALSE	GO:0006493	protein amino acid O-linked glycosylation	GO:0005575 // GO:0005794 // GO:0016020 // GO:0016021	cellular_component // Golgi apparatus // membrane // integral to membrane	GO:0003829 // GO:0008109 // GO:0008375 // GO:0016740 // GO:0016757	beta-1,3-galactosyl-O-glycosyl-glycoprotein beta-1,6-N-acetylglucosaminyltransferase activity // N-acetyllactosaminide beta-1,6-N-acetylglucosaminyltransferase activity // acetylglucosaminyltransferase activity // transferase activity // transferase activity, transferring glycosyl groups	---	---
10550915	1941	Cadm4	-1.20955	-1.07911	-1.76506	-0.933362	-0.68358	1.20625	0.856337	1.03799	0.621118	1.46296	-0.553826	-0.874798	-0.513652	-1.1608	0.00234195	1.66549	0.649875	0.522975	1.28964	1.1845	-0.20464	0.376661	-0.861325	-0.989867	-0.0465819	6.09548e-06	NM_153112	RefSeq	Mus musculus cell adhesion molecule 4 (Cadm4), mRNA.	FALSE	GO:0007049 // GO:0007155 // GO:0045786	cell cycle // cell adhesion // negative regulation of cell cycle	GO:0016020 // GO:0016021	membrane // integral to membrane	GO:0005515	protein binding	---	---
10346843	1713	Nrp2	-0.684261	-0.76579	-1.17915	-0.902322	-0.967895	0.570545	0.369192	1.50728	1.56049	1.78402	-0.819544	-0.464507	-0.879077	-0.596593	-0.57811	0.609821	1.54554	0.836939	0.658746	1.36147	-0.543567	-1.07103	-0.0423194	-1.37994	0.0700633	6.09548e-06	NM_001077403	RefSeq	Mus musculus neuropilin 2 (Nrp2), transcript variant 1, mRNA.	FALSE	GO:0001755 // GO:0007155 // GO:0007275 // GO:0007399 // GO:0007507 // GO:0030154 // GO:0050919	neural crest cell migration // cell adhesion // multicellular organismal development // nervous system development // heart development // cell differentiation // negative chemotaxis	GO:0005886 // GO:0016020 // GO:0016021 // GO:0030424	plasma membrane // membrane // integral to membrane // axon	GO:0004872 // GO:0005515 // GO:0017154	receptor activity // protein binding // semaphorin receptor activity	---	---
10448975	2315	Chtf18	-0.553071	-0.974378	-0.43175	-0.26915	-0.369061	1.02059	0.689006	1.59658	1.54926	2.14797	-1.44935	-0.505967	-0.742164	-1.00003	-1.04534	0.234702	0.546971	0.6707	1.0456	0.988489	-0.0679049	-0.555319	-0.60915	-1.61952	-0.29772	6.2079e-06	NM_145409	RefSeq	Mus musculus CTF18, chromosome transmission fidelity factor 18 homolog (S. cerevisiae) (Chtf18), mRNA.	FALSE	GO:0006260 // GO:0007049	DNA replication // cell cycle	GO:0005634	nucleus	GO:0000166 // GO:0003677 // GO:0005524 // GO:0017111	nucleotide binding // DNA binding // ATP binding // nucleoside-triphosphatase activity	---	---
10605986	2291	Slc7a3	-0.621183	-1.10946	-0.388166	-0.501518	-0.370321	0.976681	0.823066	1.08113	1.72824	1.7415	-0.893405	-0.640462	-0.519364	-0.26178	-1.72589	0.667181	0.988436	0.982567	0.722151	1.31631	-1.38281	-0.999336	-0.336148	-0.731617	-0.545808	6.2079e-06	NM_007515	RefSeq	Mus musculus solute carrier family 7 (cationic amino acid transporter, y+ system), member 3 (Slc7a3), mRNA.	FALSE	GO:0006810 // GO:0006865 // GO:0015809 // GO:0015819	transport // amino acid transport // arginine transport // lysine transport	GO:0005886 // GO:0005887 // GO:0016020 // GO:0016021	plasma membrane // integral to plasma membrane // membrane // integral to membrane	GO:0015171 // GO:0015181 // GO:0015189 // GO:0015326	amino acid transmembrane transporter activity // arginine transmembrane transporter activity // L-lysine transmembrane transporter activity // cationic amino acid transmembrane transporter activity	---	---
10453734	1658	---	-0.710186	-0.999395	-0.762816	-0.439629	-0.644635	0.884222	1.0589	0.84442	1.70617	1.03729	-1.12136	-0.859891	-0.441393	0.0657125	-0.0300559	0.964677	1.69233	1.04414	0.624509	1.29763	-0.894012	-1.27495	-1.11078	-0.854536	-1.07638	6.2079e-06	GENSCAN00000035529	ENSEMBL	cdna:Genscan chromosome:NCBIM37:18:8116926:8142616:1	FALSE	---	---	---	---	---	---	---	---
10367379	2305	Si	-0.63206	-1.25848	-0.520281	-0.782223	-0.5528	1.04858	1.15398	2.24392	1.15566	0.708767	-0.584673	-0.723567	-0.693	-1.01158	-1.17608	0.704739	0.809484	1.2795	0.373097	1.65406	-0.562103	-0.830789	-0.543529	-0.70735	-0.553266	6.61826e-06	NM_021882	RefSeq	Mus musculus silver (Si), mRNA.	FALSE	GO:0006583 // GO:0042438	melanin biosynthetic process from tyrosine // melanin biosynthetic process	GO:0016020 // GO:0016021 // GO:0042470	membrane // integral to membrane // melanosome	---	---	---	---
10395058	2293	Adi1	-0.352723	-1.5975	-0.388443	-0.746386	-0.32276	0.964529	0.72735	1.55787	1.53558	1.78906	-1.04252	-0.946181	-0.749736	-0.753399	-0.84425	0.831611	0.329487	0.998698	0.726464	1.60133	-0.455576	-0.544594	-0.799125	-0.591823	-0.926959	6.90846e-06	NM_134052	RefSeq	Mus musculus acireductone dioxygenase 1 (Adi1), mRNA.	FALSE	GO:0008652 // GO:0009086 // GO:0019509 // GO:0055114	amino acid biosynthetic process // methionine biosynthetic process // methionine salvage // oxidation reduction	GO:0005634 // GO:0005886 // GO:0016020	nucleus // plasma membrane // membrane	GO:0016151 // GO:0016491 // GO:0016702 // GO:0046872 // GO:0051213	nickel ion binding // oxidoreductase activity // oxidoreductase activity, acting on single donors with incorporation of molecular oxygen, incorporation of two atoms of oxygen // metal ion binding // dioxygenase activity	---	---
10513957	2298	Ptprd	-0.712084	-0.540519	-1.0285	-0.727413	-0.741688	0.842766	1.02677	1.7216	1.71915	1.90799	-0.680633	-0.57147	-0.836216	-0.871087	-0.680072	0.169054	1.42132	0.851358	0.266481	1.15673	-0.925217	-0.768499	-0.456403	-0.756496	-0.786922	7.28643e-06	NM_011211	RefSeq	Mus musculus protein tyrosine phosphatase, receptor type, D (Ptprd), transcript variant b, mRNA.	FALSE	GO:0006470 // GO:0016311	protein amino acid dephosphorylation // dephosphorylation	GO:0016020 // GO:0016021	membrane // integral to membrane	GO:0004721 // GO:0004725 // GO:0004872 // GO:0016787 // GO:0016791	phosphoprotein phosphatase activity // protein tyrosine phosphatase activity // receptor activity // hydrolase activity // phosphatase activity	---	---
10482500	2299	Rnd3	-0.9472	-0.795642	-0.788572	-1.14324	-0.993158	0.664019	0.982861	1.79563	1.71031	1.40397	-0.589554	-0.592743	-0.790731	-1.11014	-0.412597	0.225255	1.43714	0.767551	0.493296	1.52361	-0.89503	-0.307701	-0.378886	-0.313692	-0.944756	7.57048e-06	NM_028810	RefSeq	Mus musculus Rho family GTPase 3 (Rnd3), mRNA.	FALSE	GO:0007264	small GTPase mediated signal transduction	GO:0005622 // GO:0005794 // GO:0016020	intracellular // Golgi apparatus // membrane	GO:0000166 // GO:0005525	nucleotide binding // GTP binding	---	---
10402708	2268	Ckb	-0.618908	-0.455532	-0.182438	-0.879275	-0.692023	0.673202	0.718088	1.70375	1.47694	1.39626	-1.67048	-1.43599	-0.908364	-0.871791	-0.240333	0.628476	0.345715	0.932324	0.781884	0.88528	0.0881779	-0.116742	0.207542	-2.15252	0.386752	7.57048e-06	NM_021273	RefSeq	Mus musculus creatine kinase, brain (Ckb), mRNA.	FALSE	---	---	GO:0005737 // GO:0005739	cytoplasm // mitochondrion	GO:0000166 // GO:0003824 // GO:0004111 // GO:0005524 // GO:0016301 // GO:0016740 // GO:0016772	nucleotide binding // catalytic activity // creatine kinase activity // ATP binding // kinase activity // transferase activity // transferase activity, transferring phosphorus-containing groups	---	---
10592705	2211	Pou2f3	-0.90808	-0.815404	-0.585359	-1.01383	-1.07697	1.53208	1.79208	1.56896	1.16756	1.10412	-0.237891	-1.00659	-0.875702	-0.764191	-0.118356	0.41344	0.882534	0.712897	0.434544	1.46601	-0.512033	-0.910509	-1.08555	-0.265726	-0.898034	7.57048e-06	NM_011139	RefSeq	Mus musculus POU domain, class 2, transcription factor 3 (Pou2f3), mRNA.	FALSE	GO:0006350 // GO:0006355 // GO:0008544 // GO:0030216 // GO:0042060 // GO:0045449 // GO:0045944	transcription // regulation of transcription, DNA-dependent // epidermis development // keratinocyte differentiation // wound healing // regulation of transcription // positive regulation of transcription from RNA polymerase II promoter	GO:0005634 // GO:0005667	nucleus // transcription factor complex	GO:0003677 // GO:0003700 // GO:0043565 // GO:0043565 // GO:0046983	DNA binding // transcription factor activity // sequence-specific DNA binding // sequence-specific DNA binding // protein dimerization activity	---	---
10353923	1141	Fam178b	0.967679	1.82293	1.1131	1.3793	0.922637	-0.91132	-0.776592	-0.954424	-1.36417	-0.908739	0.281912	0.743674	0.798068	0.716398	1.1823	-0.858127	-1.57197	-0.469973	-0.246473	-1.85834	0.489533	-0.00585181	-0.330958	-0.420432	0.259837	7.57048e-06	NM_201365	RefSeq	Mus musculus family with sequence similarity 178, member B (Fam178b), transcript variant C, mRNA.	FALSE	---	---	---	---	---	---	---	---
10376074	1084	P4ha2	0.870933	0.2519	0.773365	0.774504	0.839151	-0.942217	-0.695908	-1.17947	-1.22994	-0.867887	0.609901	1.27937	1.81107	1.01826	1.95797	-0.373207	-0.0171725	-0.851791	-0.194748	-1.21335	0.133832	-0.57844	-1.67674	0.210497	-0.709874	7.57048e-06	NM_001136076	RefSeq	Mus musculus procollagen-proline, 2-oxoglutarate 4-dioxygenase (proline 4-hydroxylase), alpha II polypeptide (P4ha2), transcript variant 1, mRNA.	FALSE	GO:0018401 // GO:0019538 // GO:0055114	peptidyl-proline hydroxylation to 4-hydroxy-L-proline // protein metabolic process // oxidation reduction	GO:0005783	endoplasmic reticulum	GO:0004656 // GO:0005488 // GO:0005506 // GO:0005515 // GO:0016491 // GO:0016702 // GO:0016706 // GO:0031418 // GO:0046872	procollagen-proline 4-dioxygenase activity // binding // iron ion binding // protein binding // oxidoreductase activity // oxidoreductase activity, acting on single donors with incorporation of molecular oxygen, incorporation of two atoms of oxygen // oxidoreductase activity, acting on paired donors, with incorporation or reduction of molecular oxygen, 2-oxoglutarate as one donor, and incorporati…	---	---
10478525	260	Wfdc2	0.787261	0.271077	1.13559	0.709068	0.757303	-1.1744	-0.940993	-1.22293	-1.32158	-1.05831	0.956676	0.42753	1.60448	0.951297	1.72517	-0.305624	-1.89262	-0.618273	-0.587278	-1.32182	0.704256	-0.0145738	0.109335	-0.000898996	0.320274	7.57048e-06	NM_026323	RefSeq	Mus musculus WAP four-disulfide core domain 2 (Wfdc2), mRNA.	FALSE	---	---	GO:0005576	extracellular region	GO:0004866 // GO:0004867 // GO:0030414	endopeptidase inhibitor activity // serine-type endopeptidase inhibitor activity // protease inhibitor activity	---	---
10412394	1922	Nnt	-0.944225	-0.0299189	-0.799915	-1.11561	-0.62221	0.876451	0.705808	1.89084	1.29823	0.988024	-1.27249	-0.400461	-1.32653	-1.84773	-1.30005	0.279668	1.26893	0.747251	0.64681	1.10062	-0.630846	0.614218	0.00467009	0.0542611	-0.185788	7.99568e-06	NR_003544	RefSeq	Mus musculus nicotinamide nucleotide transhydrogenase (Nnt), transcript variant 2, transcribed RNA.	FALSE	GO:0008152 // GO:0015992 // GO:0055114	metabolic process // proton transport // oxidation reduction	GO:0005739 // GO:0005743 // GO:0016020 // GO:0016021	mitochondrion // mitochondrial inner membrane // membrane // integral to membrane	GO:0003824 // GO:0005488 // GO:0008746 // GO:0008750 // GO:0009055 // GO:0016491	catalytic activity // binding // NAD(P) transhydrogenase activity // NAD(P)+ transhydrogenase (AB-specific) activity // electron carrier activity // oxidoreductase activity	---	---
10606674	999	Taf7l	0.907996	0.775192	1.06255	0.861313	0.595018	-0.895926	-0.010834	-0.51993	-0.330346	-0.0302417	0.786552	1.35003	1.26377	1.10471	1.91502	-0.401676	-0.402526	-0.445521	-0.784147	-0.746455	-0.454213	-1.47107	-1.06212	-1.11858	-1.94856	7.99568e-06	NM_028958	RefSeq	Mus musculus TAF7-like RNA polymerase II, TATA box binding protein (TBP)-associated factor (Taf7l), mRNA.	FALSE	GO:0006350 // GO:0006355 // GO:0006367 // GO:0007275 // GO:0007283 // GO:0008150 // GO:0030154	transcription // regulation of transcription, DNA-dependent // transcription initiation from RNA polymerase II promoter // multicellular organismal development // spermatogenesis // biological_process // cell differentiation	GO:0005575 // GO:0005634 // GO:0005669 // GO:0005737	cellular_component // nucleus // transcription factor TFIID complex // cytoplasm	GO:0003674 // GO:0016251	molecular_function // general RNA polymerase II transcription factor activity	---	---
10523325	925	---	1.31409	1.11727	0.951182	1.51494	1.29675	-0.87395	-0.595816	-1.33675	-0.692096	-0.619635	-0.204224	1.11122	1.3629	0.659818	1.31757	-0.744118	-0.365336	-0.622325	-0.784592	-1.23527	0.500336	0.0776674	-0.642689	-1.39803	-1.10891	7.99568e-06	ENSMUST00000098286	ENSEMBL	cdna:known chromosome:NCBIM37:5:95051238:95055546:1 gene:ENSMUSG00000074008	FALSE	---	---	---	---	---	---	---	---
10416023	1721	Scara5	-0.470511	-0.605441	-0.938345	-0.494859	-0.352797	0.556832	1.12177	2.19553	1.74757	1.53718	-0.799534	-0.566228	-0.795876	-0.90862	-1.22442	0.271287	0.695506	0.80369	0.564349	1.38114	-1.0732	-0.885545	-0.739241	-0.566443	-0.45378	8.24214e-06	NM_028903	RefSeq	Mus musculus scavenger receptor class A, member 5 (putative) (Scara5), mRNA.	FALSE	---	---	GO:0005886 // GO:0016020 // GO:0016021	plasma membrane // membrane // integral to membrane	GO:0005044	scavenger receptor activity	---	---
10569024	1692	Sigirr	-1.30586	-0.932449	-0.585677	-0.887618	-0.931827	0.493105	0.74817	1.26525	1.65712	2.10406	-0.34943	-1.34345	-0.626635	-0.647758	-0.632123	0.834458	1.52188	0.950174	0.68653	0.799404	-0.516553	-0.468289	-0.734998	-0.716319	-0.38117	8.26739e-06	NM_023059	RefSeq	Mus musculus single immunoglobulin and toll-interleukin 1 receptor (TIR) domain (Sigirr), mRNA.	FALSE	GO:0001960 // GO:0006953 // GO:0007165 // GO:0045079 // GO:0045087	negative regulation of cytokine mediated signaling pathway // acute-phase response // signal transduction // negative regulation of chemokine biosynthetic process // innate immune response	GO:0016020 // GO:0016021 // GO:0031224	membrane // integral to membrane // intrinsic to membrane	GO:0004872 // GO:0004888	receptor activity // transmembrane receptor activity	---	---
10605104	1948	Pdzd4	-0.870849	-1.06652	-0.536104	-0.633683	-0.699214	1.4245	0.955421	1.82513	1.10901	1.00922	-1.01565	-0.51625	-1.15519	-1.29329	-1.83865	0.520861	-0.305064	1.38214	0.619386	0.87258	-0.760039	-0.340191	0.490545	0.528148	0.293757	8.32816e-06	NM_001029868	RefSeq	Mus musculus PDZ domain containing 4 (Pdzd4), mRNA.	FALSE	---	---	GO:0005737	cytoplasm	GO:0005515	protein binding	---	---
10387170	1929	Ntn1	-0.36961	-0.593981	-1.02334	-0.758697	-0.705458	1.38762	0.522788	0.859836	1.13141	0.541732	-0.493091	-0.631034	-1.92333	-1.13564	-1.36439	0.847637	1.82841	1.23789	0.990146	1.30819	0.146636	-0.123273	-0.770373	-0.62324	-0.286845	8.39906e-06	NM_008744	RefSeq	Mus musculus netrin 1 (Ntn1), mRNA.	FALSE	GO:0001764 // GO:0006915 // GO:0007409 // GO:0007411 // GO:0007411 // GO:0008284 // GO:0030334 // GO:0030334 // GO:0030517 // GO:0030879 // GO:0040023 // GO:0045773	neuron migration // apoptosis // axonogenesis // axon guidance // axon guidance // positive regulation of cell proliferation // regulation of cell migration // regulation of cell migration // negative regulation of axon extension // mammary gland development // establishment of nucleus localization // positive regulation of axon extension	GO:0005576 // GO:0005578 // GO:0005604 // GO:0005737	extracellular region // proteinaceous extracellular matrix // basement membrane // cytoplasm	GO:0005515	protein binding	---	---
10407097	1594	Pde4d	-0.933252	-0.949708	-0.549562	-0.0360776	-0.570899	1.48599	1.55196	1.40775	1.48579	1.28172	-0.240548	-0.362251	-1.35551	-0.427665	-0.479561	0.433417	0.647254	0.93432	0.44691	1.01575	-0.336484	-0.784773	-1.75348	-0.526348	-1.38475	8.39906e-06	NM_011056	RefSeq	Mus musculus phosphodiesterase 4D, cAMP specific (Pde4d), mRNA.	FALSE	GO:0006198 // GO:0006939 // GO:0007165	cAMP catabolic process // smooth muscle contraction // signal transduction	GO:0005737 // GO:0005856 // GO:0016020	cytoplasm // cytoskeleton // membrane	GO:0003824 // GO:0004114 // GO:0016787 // GO:0046872	catalytic activity // 3',5'-cyclic-nucleotide phosphodiesterase activity // hydrolase activity // metal ion binding	---	---
10536427	1527	---	-0.052627	-0.429442	-0.166548	0.0372063	0.114246	0.88567	1.46174	1.32201	1.08927	0.851016	-1.24451	-0.854557	-0.392062	-0.84836	-0.541404	0.542524	0.556697	1.43961	1.1543	1.29785	-0.822986	-1.49129	-1.18711	-1.50003	-1.22121	8.39906e-06	ENSMUST00000121833	ENSEMBL	cdna:pseudogene chromosome:NCBIM37:6:12807397:12808390:1 gene:ENSMUSG00000083620	FALSE	---	---	---	---	---	---	---	---
10606060	1000	EG212753	0.432224	0.83436	0.900074	0.749579	1.09526	-0.592643	-0.445233	-0.104478	-0.646895	-0.0320487	1.28841	1.09871	1.56193	1.2936	1.83386	-1.06067	-0.488907	-0.759315	-0.692444	-1.10753	-0.666965	-1.04778	-1.09173	-0.979971	-1.3714	8.39906e-06	XM_136015	RefSeq	PREDICTED: Mus musculus predicted gene, EG212753 (EG212753), mRNA.	FALSE	---	---	---	---	---	---	---	---
10536107	926	EG620639 // 624421 // EG665031	1.34181	1.18121	0.958348	1.50673	1.29979	-0.883903	-0.606457	-1.27367	-0.694864	-0.633042	-0.26507	1.11943	1.37295	0.654507	1.28692	-0.755752	-0.365496	-0.625636	-0.788097	-1.23594	0.437591	0.0810424	-0.596375	-1.34357	-1.17246	8.39906e-06	ENSMUST00000115900	ENSEMBL	hypothetical protein gene:ENSMUSG00000079767	FALSE	---	---	---	---	---	---	---	---
10458663	2252	Dpysl3	-0.179396	-0.624484	-0.677714	-0.534587	-0.678311	0.595326	0.256996	0.95651	1.21734	1.44742	-0.576438	-0.16756	-1.00929	-0.15293	-0.583547	1.28039	1.85463	1.09755	0.823334	1.34179	-1.32228	-1.5161	-0.583313	-1.09862	-1.16673	8.62869e-06	NM_009468	RefSeq	Mus musculus dihydropyrimidinase-like 3 (Dpysl3), transcript variant 2, mRNA.	FALSE	GO:0007399	nervous system development	GO:0005737 // GO:0042995	cytoplasm // cell projection	GO:0016787	hydrolase activity	---	---
10438911	2297	Atp13a3	-0.912819	-0.443434	-0.495527	-1.77883	-1.18661	0.673705	0.928459	1.50422	1.05759	1.88531	-1.02193	-0.852893	-0.51919	-0.915883	-0.394276	0.699981	1.13367	0.757294	0.624253	1.64282	-0.213692	-0.707436	-0.58836	-0.713526	-0.162895	9.04638e-06	NM_001128096	RefSeq	Mus musculus ATPase type 13A3 (Atp13a3), transcript variant 1, mRNA.	FALSE	GO:0008150	biological_process	GO:0005575	cellular_component	GO:0003674	molecular_function	---	---
10421749	1110	Akap11	1.08962	1.46768	0.508315	0.654142	0.858312	-0.565946	-0.38684	-0.831049	-1.5203	-0.779593	1.33216	1.11532	1.20495	1.66735	1.0345	-1.19907	0.313995	-0.644801	-1.11262	-0.667126	-1.0757	-1.21036	-0.346329	-0.299775	-0.606837	9.30384e-06	AK129178	GenBank	Mus musculus mRNA for mKIAA0629 protein.	FALSE	GO:0008150	biological_process	GO:0005777	peroxisome	GO:0019207	kinase regulator activity	---	---
10522558	931	---	1.36538	1.19577	0.972586	1.51529	1.29727	-0.821307	-0.672243	-1.32394	-0.658933	-0.590203	-0.281466	1.12754	1.39026	0.682905	1.23477	-0.72337	-0.389627	-0.650471	-0.724147	-1.25396	0.355671	0.0887902	-0.660154	-1.31961	-1.15681	9.30384e-06	ENSMUST00000097478	ENSEMBL	cdna:known chromosome:NCBIM37:5:94741700:94746002:1 gene:ENSMUSG00000073498	FALSE	---	---	---	---	---	---	---	---
10549645	1659	---	-0.790268	-0.957414	-1.18377	-0.922427	-0.59876	0.775481	0.95637	0.873235	1.72183	1.47133	-1.01331	-0.861245	-0.786132	-0.025798	0.0147412	0.76035	1.82025	0.671307	0.735113	1.30323	-0.738295	-0.848523	-0.83159	-0.372506	-1.1732	1.04575e-05	---	---	---	---	---	---	---	---	---	---	---	---
10522585	932	---	1.37308	1.1813	0.995172	1.53137	1.29472	-0.812814	-0.684023	-1.36974	-0.676391	-0.617074	-0.287457	1.12965	1.38606	0.663896	1.26023	-0.689031	-0.404976	-0.669756	-0.668462	-1.21856	0.330978	0.0697668	-0.694035	-1.24888	-1.17501	1.06467e-05	ENSMUST00000097478	ENSEMBL	cdna:known chromosome:NCBIM37:5:94741700:94746002:1 gene:ENSMUSG00000073498	FALSE	---	---	---	---	---	---	---	---
10421758	1111	Akap11	1.19907	1.59875	0.525844	0.548848	0.664976	-0.997262	-0.526457	-0.763501	-1.26744	-0.791913	1.48069	1.11093	1.29915	1.74496	0.66808	-1.06461	0.244824	-0.48826	-1.20289	-0.772652	-0.901418	-1.09567	-0.243604	-0.115364	-0.855075	1.0878e-05	AK129178	GenBank	Mus musculus mRNA for mKIAA0629 protein.	FALSE	GO:0008150	biological_process	GO:0005777	peroxisome	GO:0019207	kinase regulator activity	---	---
10523337	930	---	1.39138	1.23575	0.96559	1.49823	1.26648	-0.7948	-0.678539	-1.35908	-0.63291	-0.589373	-0.273499	1.12888	1.3687	0.673394	1.24289	-0.752018	-0.340068	-0.637313	-0.695482	-1.23237	0.338279	0.0690444	-0.674402	-1.3377	-1.18105	1.0878e-05	ENSMUST00000097478	ENSEMBL	cdna:known chromosome:NCBIM37:5:94741700:94746002:1 gene:ENSMUSG00000073498	FALSE	---	---	---	---	---	---	---	---
10536025	929	---	1.39138	1.23575	0.96559	1.49823	1.26648	-0.7948	-0.678539	-1.35908	-0.63291	-0.589373	-0.273499	1.12888	1.3687	0.673394	1.24289	-0.752018	-0.340068	-0.637313	-0.695482	-1.23237	0.338279	0.0690444	-0.674402	-1.3377	-1.18105	1.0878e-05	ENSMUST00000097478	ENSEMBL	cdna:known chromosome:NCBIM37:5:94741700:94746002:1 gene:ENSMUSG00000073498	FALSE	---	---	---	---	---	---	---	---
10536006	928	---	1.32132	1.18304	0.982499	1.51511	1.25851	-0.849755	-0.654111	-1.3588	-0.721361	-0.678416	-0.259289	1.0984	1.37235	0.596658	1.36115	-0.717466	-0.383203	-0.652177	-0.683257	-1.3274	0.458642	0.0914986	-0.601682	-1.22102	-1.13125	1.0878e-05	ENSMUST00000098286	ENSEMBL	cdna:known chromosome:NCBIM37:5:95051238:95055546:1 gene:ENSMUSG00000074008	FALSE	---	---	---	---	---	---	---	---
10452430	2294	Fbxl17	-0.765669	-1.67275	-0.199952	-0.774183	-0.402177	1.18603	0.378178	1.02009	1.36385	1.61197	-1.24114	-0.361205	-0.887214	-0.459071	-1.17177	0.963376	0.784561	1.01717	0.837403	1.79175	-0.753098	-1.02244	-0.645539	-0.185275	-0.412898	1.10054e-05	BC138331	GenBank	Mus musculus F-box and leucine-rich repeat protein 17, mRNA (cDNA clone MGC:169956 IMAGE:8861351), complete cds.	FALSE	GO:0006511	ubiquitin-dependent protein catabolic process	---	---	---	---	---	---
10499348	2292	Tmem79	-0.573021	-1.11547	-0.866475	-0.588146	-0.457653	0.845769	0.575177	1.06554	1.52877	1.96341	-0.384144	-0.738079	-1.13646	-0.731375	-1.65708	0.154516	1.0254	1.06304	0.872477	1.54339	-0.712029	-0.577481	0.397215	-0.66187	-0.835434	1.10054e-05	NM_024246	RefSeq	Mus musculus transmembrane protein 79 (Tmem79), mRNA.	FALSE	---	---	GO:0016020 // GO:0016021	membrane // integral to membrane	---	---	---	---
10495896	2248	Camk2d	-0.278036	-0.523933	-0.562504	-0.693889	-1.14089	0.592548	1.06694	1.30798	0.944804	1.01636	-0.89286	-0.140181	-1.06972	-0.422548	-1.30281	1.06792	2.11117	0.85422	0.567663	1.41195	-1.248	-0.905151	-0.789776	-0.000592138	-0.970656	1.10054e-05	NM_001025439	RefSeq	Mus musculus calcium/calmodulin-dependent protein kinase II, delta (Camk2d), transcript variant 1, mRNA.	FALSE	GO:0000082 // GO:0006468 // GO:0006816 // GO:0006816 // GO:0046777 // GO:0060048	G1/S transition of mitotic cell cycle // protein amino acid phosphorylation // calcium ion transport // calcium ion transport // protein amino acid autophosphorylation // cardiac muscle contraction	GO:0005634 // GO:0005737 // GO:0005954 // GO:0030315	nucleus // cytoplasm // calcium- and calmodulin-dependent protein kinase complex // T-tubule	GO:0000166 // GO:0004672 // GO:0004674 // GO:0004683 // GO:0005516 // GO:0005524 // GO:0016301 // GO:0016740	nucleotide binding // protein kinase activity // protein serine/threonine kinase activity // calmodulin-dependent protein kinase activity // calmodulin binding // ATP binding // kinase activity // transferase activity	GenMAPP // GenMAPP	Calcium_regulation_in_cardiac_cells // Smooth_muscle_contraction
10457054	2247	Zadh2	-0.632321	-0.682568	-0.727292	-0.610888	-1.18705	0.812956	0.986324	2.07927	1.40908	1.428	-0.455066	0.0458819	-1.24295	-0.627123	-1.06778	0.750046	1.32748	0.711355	0.3737	1.15386	-1.06921	-0.58325	-0.643032	-0.496666	-1.05275	1.10054e-05	NM_146090	RefSeq	Mus musculus zinc binding alcohol dehydrogenase, domain containing 2 (Zadh2), mRNA.	FALSE	GO:0008152 // GO:0055114	metabolic process // oxidation reduction	---	---	GO:0003824 // GO:0005488 // GO:0008270 // GO:0016491	catalytic activity // binding // zinc ion binding // oxidoreductase activity	---	---
10438815	1921	1600021P15Rik	-1.07583	-0.0293868	-0.673266	-1.05241	-0.960416	1.54009	1.393	1.52967	0.962478	0.676957	-1.1936	-0.530916	-1.69684	-0.276013	-1.10303	0.107954	1.30372	1.10192	0.794281	1.14593	-0.984509	0.155645	-0.131739	-0.673381	-0.330313	1.10054e-05	NM_177718	RefSeq	Mus musculus RIKEN cDNA 1600021P15 gene (1600021P15Rik), mRNA.	FALSE	---	---	---	---	---	---	---	---
10414360	1822	Lgals3	-0.323104	-0.870353	-0.926523	-0.465037	-0.47718	0.762808	0.352594	0.817831	1.76618	1.67861	-0.591043	-0.395874	-0.950253	-0.355998	-1.34138	0.968115	1.63853	0.887899	0.809954	1.33068	-0.345924	-0.883559	-0.623186	-1.34908	-1.11471	1.10054e-05	NM_010705	RefSeq	Mus musculus lectin, galactose binding, soluble 3 (Lgals3), mRNA.	FALSE	GO:0001501 // GO:0030154 // GO:0030198	skeletal system development // cell differentiation // extracellular matrix organization	GO:0005578 // GO:0005634 // GO:0005634 // GO:0005737 // GO:0005737	proteinaceous extracellular matrix // nucleus // nucleus // cytoplasm // cytoplasm	GO:0005515 // GO:0005529 // GO:0019863	protein binding // sugar binding // IgE binding	---	---
10476321	1819	Prnd	-0.637782	-1.53732	-0.799308	-0.324283	-0.700147	0.951433	1.37366	0.379194	1.43981	1.7477	-0.697275	-0.553061	-0.751211	-0.920979	-0.564806	0.432973	1.26137	0.909761	0.725457	1.8794	-1.00251	-0.524818	-0.680308	-0.629643	-0.777313	1.10054e-05	NM_023043	RefSeq	Mus musculus prion protein dublet (Prnd), transcript variant 1, mRNA.	FALSE	GO:0006878 // GO:0051260	cellular copper ion homeostasis // protein homooligomerization	GO:0005886 // GO:0016020 // GO:0031225	plasma membrane // membrane // anchored to membrane	GO:0005507	copper ion binding	---	---
10489440	1708	Wfdc15a	-0.450715	-0.22005	-1.19204	-0.71152	-0.730756	0.752881	0.924509	1.73156	1.61349	2.0758	-0.276292	-0.861163	-0.48175	-0.752836	-0.418329	0.585049	0.828133	0.872434	0.684029	0.884172	-0.454253	-1.10067	-1.228	-1.19258	-0.881099	1.10054e-05	NM_183271	RefSeq	Mus musculus WAP four-disulfide core domain 15A (Wfdc15a), mRNA.	FALSE	GO:0042742	defense response to bacterium	GO:0005576	extracellular region	GO:0030414	protease inhibitor activity	---	---
10494281	1526	Hormad1	-0.0111664	-0.62073	0.102861	0.0904409	-0.184351	1.26056	1.21721	0.935048	1.06342	0.997375	-0.774967	-0.740204	-0.166501	-0.632764	-0.310437	0.632443	0.271922	1.46936	1.18834	1.15736	-0.815927	-1.607	-1.37888	-1.98624	-1.15718	1.10054e-05	NM_026489	RefSeq	Mus musculus HORMA domain containing 1 (Hormad1), mRNA.	FALSE	GO:0007067 // GO:0008150	mitosis // biological_process	GO:0005575	cellular_component	GO:0003674	molecular_function	---	---
10591522	1204	Ap1m2	-0.850714	-2.16802	-0.421239	-1.02572	-1.04853	1.1063	1.31499	1.07951	0.40816	0.747317	-0.716448	-0.715936	-1.34	-1.18757	-1.49997	0.119953	0.693184	1.20403	0.487481	0.922496	0.421878	0.787864	0.715566	0.246276	0.719143	1.10054e-05	NM_001110300	RefSeq	Mus musculus adaptor protein complex AP-1, mu 2 subunit (Ap1m2), transcript variant 1, mRNA.	FALSE	GO:0006810 // GO:0006886 // GO:0015031 // GO:0016192	transport // intracellular protein transport // protein transport // vesicle-mediated transport	GO:0005794 // GO:0005802 // GO:0016020 // GO:0030131 // GO:0031410	Golgi apparatus // trans-Golgi network // membrane // clathrin adaptor complex // cytoplasmic vesicle	GO:0005515	protein binding	---	---
10457077	1140	Fbxo15	1.09299	0.734142	1.13296	1.01629	1.08163	-1.09819	-0.781412	-1.13273	-1.09381	-0.965781	0.368839	0.51699	1.52736	1.22172	1.43726	-0.334753	-1.22281	-0.440705	-0.136129	-1.85975	0.264205	-0.0352874	-0.00430544	-1.37802	0.0893049	1.10054e-05	NM_015798	RefSeq	Mus musculus F-box protein 15 (Fbxo15), mRNA.	FALSE	GO:0006511	ubiquitin-dependent protein catabolic process	GO:0019005	SCF ubiquitin ligase complex	GO:0004842 // GO:0005515	ubiquitin-protein ligase activity // protein binding	---	---
10562323	1112	Wtip	0.651035	0.817818	1.48529	0.767062	0.892338	-0.446564	-0.234895	-0.232359	-0.761182	-0.439826	1.1541	1.49688	1.58135	1.16802	0.667415	-0.978559	-0.414415	-0.97565	-1.04954	-1.80231	-0.527611	-1.70193	-0.199988	-0.836545	-0.0799405	1.10054e-05	NM_207212	RefSeq	Mus musculus WT1-interacting protein (Wtip), mRNA.	FALSE	GO:0006350 // GO:0006355	transcription // regulation of transcription, DNA-dependent	GO:0005634 // GO:0030054	nucleus // cell junction	GO:0008270 // GO:0046872	zinc ion binding // metal ion binding	---	---
10396831	961	Arg2	1.20123	0.737892	1.29409	1.38963	0.907975	-0.466051	-0.875137	-1.07024	-0.37351	-0.10996	-0.0216569	1.21352	1.91445	1.02341	1.32955	-0.915226	-0.902358	-0.784842	-0.503791	-0.902236	-0.484392	-0.576122	-0.51873	-1.38393	-1.12358	1.10054e-05	NM_009705	RefSeq	Mus musculus arginase type II (Arg2), mRNA.	FALSE	GO:0000050 // GO:0006525 // GO:0006941	urea cycle // arginine metabolic process // striated muscle contraction	GO:0005739 // GO:0005739	mitochondrion // mitochondrion	GO:0004053 // GO:0005515 // GO:0016787 // GO:0016813 // GO:0030145 // GO:0046872	arginase activity // protein binding // hydrolase activity // hydrolase activity, acting on carbon-nitrogen (but not peptide) bonds, in linear amidines // manganese ion binding // metal ion binding	---	---
10500321	958	Bola1	1.44892	0.700306	0.889214	1.76057	0.787829	-1.20222	-0.722839	-1.08193	-0.377065	-0.223482	0.105779	0.964634	1.77904	1.03684	1.12949	-0.738165	-0.75733	-0.903755	-1.41098	-1.58387	-0.218251	-0.188487	-0.248711	-0.267268	-0.67828	1.10054e-05	NM_026975	RefSeq	Mus musculus bolA-like 1 (E. coli) (Bola1), mRNA.	FALSE	---	---	---	---	---	---	---	---
10523316	941	---	1.3556	1.18543	1.02238	1.55186	1.28074	-0.806689	-0.687473	-1.32051	-0.644063	-0.601432	-0.279246	1.13149	1.37286	0.635848	1.27567	-0.698757	-0.362789	-0.677857	-0.589874	-1.36355	0.294251	0.0367693	-0.727133	-1.21542	-1.16811	1.10054e-05	ENSMUST00000098286	ENSEMBL	cdna:known chromosome:NCBIM37:5:95051238:95055546:1 gene:ENSMUSG00000074008	FALSE	---	---	---	---	---	---	---	---
10523346	940	---	1.3556	1.18543	1.02238	1.55186	1.28074	-0.806689	-0.687473	-1.32051	-0.644063	-0.601432	-0.279246	1.13149	1.37286	0.635848	1.27567	-0.698757	-0.362789	-0.677857	-0.589874	-1.36355	0.294251	0.0367693	-0.727133	-1.21542	-1.16811	1.10054e-05	ENSMUST00000098286	ENSEMBL	cdna:known chromosome:NCBIM37:5:95051238:95055546:1 gene:ENSMUSG00000074008	FALSE	---	---	---	---	---	---	---	---
10536033	939	---	1.3556	1.18543	1.02238	1.55186	1.28074	-0.806689	-0.687473	-1.32051	-0.644063	-0.601432	-0.279246	1.13149	1.37286	0.635848	1.27567	-0.698757	-0.362789	-0.677857	-0.589874	-1.36355	0.294251	0.0367693	-0.727133	-1.21542	-1.16811	1.10054e-05	ENSMUST00000098286	ENSEMBL	cdna:known chromosome:NCBIM37:5:95051238:95055546:1 gene:ENSMUSG00000074008	FALSE	---	---	---	---	---	---	---	---
10536044	938		1.3556	1.18543	1.02238	1.55186	1.28074	-0.806689	-0.687473	-1.32051	-0.644063	-0.601432	-0.279246	1.13149	1.37286	0.635848	1.27567	-0.698757	-0.362789	-0.677857	-0.589874	-1.36355	0.294251	0.0367693	-0.727133	-1.21542	-1.16811	1.10054e-05
10536118	937		1.36878	1.20179	1.01328	1.55286	1.29786	-0.802686	-0.677712	-1.30803	-0.648642	-0.606918	-0.287655	1.1172	1.38442	0.639334	1.28158	-0.710765	-0.381887	-0.686273	-0.593972	-1.34356	0.253553	0.0224223	-0.722742	-1.18717	-1.17508	1.10054e-05
10536143	935	---	1.3811	1.24614	0.975071	1.50234	1.28009	-0.771062	-0.680354	-1.36796	-0.609086	-0.603076	-0.288479	1.10018	1.3659	0.659545	1.24914	-0.763497	-0.364299	-0.653468	-0.604394	-1.27379	0.341426	0.0635022	-0.671741	-1.34257	-1.17064	1.10054e-05	ENSMUST00000098286	ENSEMBL	cdna:known chromosome:NCBIM37:5:95051238:95055546:1 gene:ENSMUSG00000074008	FALSE	---	---	---	---	---	---	---	---
10536052	934	---	1.3811	1.24614	0.975071	1.50234	1.28009	-0.771062	-0.680354	-1.36796	-0.609086	-0.603076	-0.288479	1.10018	1.3659	0.659545	1.24914	-0.763497	-0.364299	-0.653468	-0.604394	-1.27379	0.341426	0.0635022	-0.671741	-1.34257	-1.17064	1.10054e-05	ENSMUST00000097478	ENSEMBL	cdna:known chromosome:NCBIM37:5:94741700:94746002:1 gene:ENSMUSG00000073498	FALSE	---	---	---	---	---	---	---	---
10536103	933	---	1.40383	1.22199	0.980012	1.5098	1.26873	-0.769	-0.675792	-1.3515	-0.617108	-0.64017	-0.298376	1.12023	1.386	0.66296	1.24851	-0.746132	-0.37578	-0.65511	-0.664138	-1.28741	0.335471	0.0636592	-0.711736	-1.26636	-1.14259	1.10054e-05	ENSMUST00000098286	ENSEMBL	cdna:known chromosome:NCBIM37:5:95051238:95055546:1 gene:ENSMUSG00000074008	FALSE	---	---	---	---	---	---	---	---
10536163	927		1.33965	1.15252	0.953842	1.53198	1.28142	-0.82881	-0.667457	-1.32585	-0.715566	-0.611979	-0.294926	1.1085	1.38847	0.63832	1.34647	-0.681793	-0.447567	-0.708884	-0.635566	-1.37003	0.410195	0.112012	-0.667731	-1.16895	-1.13826	1.10054e-05
10485070	576	Mdk	0.560113	0.543537	0.928731	0.861488	0.731833	-0.501269	-0.365694	-1.46049	-1.88707	-1.54429	0.838132	0.304265	0.902979	0.739508	0.193925	-0.744201	-1.52943	-0.709458	-0.886443	-1.31409	0.626833	1.27493	0.402034	1.4829	0.551234	1.10054e-05	NM_010784	RefSeq	Mus musculus midkine (Mdk), transcript variant 1, mRNA.	FALSE	GO:0007275 // GO:0008283 // GO:0009611 // GO:0030154	multicellular organismal development // cell proliferation // response to wounding // cell differentiation	GO:0005576	extracellular region	GO:0008083 // GO:0008201	growth factor activity // heparin binding	---	---
10465427	1722	Rps6ka4	-0.757728	-0.837427	-0.650062	-0.726325	-0.716979	0.960207	0.491965	1.75188	1.5953	2.31341	-0.946236	-0.346605	-0.661864	-0.691642	-0.766371	0.541046	1.09237	0.480644	0.675046	1.03403	-1.10633	-0.989638	-0.629517	-0.832509	-0.276666	1.10136e-05	NM_019924	RefSeq	Mus musculus ribosomal protein S6 kinase, polypeptide 4 (Rps6ka4), mRNA.	FALSE	GO:0006468 // GO:0007243	protein amino acid phosphorylation // protein kinase cascade	GO:0005634	nucleus	GO:0000166 // GO:0000287 // GO:0004672 // GO:0004674 // GO:0005515 // GO:0005524 // GO:0016301 // GO:0016740	nucleotide binding // magnesium ion binding // protein kinase activity // protein serine/threonine kinase activity // protein binding // ATP binding // kinase activity // transferase activity	---	---
10536151	936	EG622744 // EG666209	1.35646	1.18522	1.01552	1.55073	1.27896	-0.811394	-0.673352	-1.35329	-0.669556	-0.597665	-0.287198	1.13386	1.36237	0.644269	1.27696	-0.68512	-0.371439	-0.678399	-0.613418	-1.35854	0.317534	0.0514375	-0.73936	-1.15863	-1.17596	1.11495e-05	ENSMUST00000101011	ENSEMBL	hypothetical protein gene:ENSMUSG00000072814	FALSE	---	---	---	---	---	---	---	---
10370127	2316	Pcnt	-0.197375	-1.18563	-0.520695	-0.393162	-0.0888012	1.36157	0.608573	1.14539	1.68319	1.3569	-0.98499	-0.595134	-0.924402	-1.05424	-1.50546	-0.0560894	1.47763	0.687441	1.02507	1.04638	-0.0814558	-0.332106	-0.260128	-1.7836	-0.42888	1.12367e-05	NM_008787	RefSeq	Mus musculus pericentrin (kendrin) (Pcnt), transcript variant 1, mRNA.	FALSE	GO:0007051 // GO:0042384	spindle organization // cilium assembly	GO:0005813 // GO:0005814 // GO:0005815 // GO:0005874	centrosome // centriole // microtubule organizing center // microtubule	---	---	---	---
10509280	2246	Hspg2	-0.677427	-0.335739	-0.829658	-0.937871	-0.975007	1.28141	0.497293	1.77943	1.0852	1.27562	-0.517739	-0.2173	-0.727603	-0.299915	-0.821523	0.475203	1.82122	1.11784	0.434957	1.1252	-1.61561	-0.821555	-0.528499	-1.22231	-0.365627	1.12367e-05	NM_008305	RefSeq	Mus musculus perlecan (heparan sulfate proteoglycan 2) (Hspg2), mRNA.	FALSE	GO:0001958 // GO:0002062 // GO:0007155 // GO:0007420 // GO:0008104 // GO:0030198 // GO:0048704 // GO:0048738 // GO:0060351	endochondral ossification // chondrocyte differentiation // cell adhesion // brain development // protein localization // extracellular matrix organization // embryonic skeletal system morphogenesis // cardiac muscle development // cartilage development involved in endochondral bone morphogenesis	GO:0005576 // GO:0005578 // GO:0005604 // GO:0005605 // GO:0031012	extracellular region // proteinaceous extracellular matrix // basement membrane // basal lamina // extracellular matrix	GO:0005515	protein binding	---	---
10582845	1981	---	-0.395264	-1.71783	-0.559698	-0.262524	-0.306731	0.486438	0.878599	1.2109	1.2931	1.27054	-1.6426	-0.32737	-0.723424	-0.776537	-1.276	0.814803	1.23046	1.16417	0.857238	0.903908	0.676155	-0.332732	0.10229	-1.54371	-1.02418	1.12367e-05	---	---	---	---	---	---	---	---	---	---	---	---
10579823	1980	---	-0.395264	-1.71783	-0.559698	-0.262524	-0.306731	0.486438	0.878599	1.2109	1.2931	1.27054	-1.6426	-0.32737	-0.723424	-0.776537	-1.276	0.814803	1.23046	1.16417	0.857238	0.903908	0.676155	-0.332732	0.10229	-1.54371	-1.02418	1.12367e-05	---	---	---	---	---	---	---	---	---	---	---	---
10476658	1979	---	-0.395264	-1.71783	-0.559698	-0.262524	-0.306731	0.486438	0.878599	1.2109	1.2931	1.27054	-1.6426	-0.32737	-0.723424	-0.776537	-1.276	0.814803	1.23046	1.16417	0.857238	0.903908	0.676155	-0.332732	0.10229	-1.54371	-1.02418	1.12367e-05	---	---	---	---	---	---	---	---	---	---	---	---
10436826	1978	---	-0.395264	-1.71783	-0.559698	-0.262524	-0.306731	0.486438	0.878599	1.2109	1.2931	1.27054	-1.6426	-0.32737	-0.723424	-0.776537	-1.276	0.814803	1.23046	1.16417	0.857238	0.903908	0.676155	-0.332732	0.10229	-1.54371	-1.02418	1.12367e-05	---	---	---	---	---	---	---	---	---	---	---	---
10417599	1977	---	-0.395264	-1.71783	-0.559698	-0.262524	-0.306731	0.486438	0.878599	1.2109	1.2931	1.27054	-1.6426	-0.32737	-0.723424	-0.776537	-1.276	0.814803	1.23046	1.16417	0.857238	0.903908	0.676155	-0.332732	0.10229	-1.54371	-1.02418	1.12367e-05	---	---	---	---	---	---	---	---	---	---	---	---
10421524	1976	---	-0.395264	-1.71783	-0.559698	-0.262524	-0.306731	0.486438	0.878599	1.2109	1.2931	1.27054	-1.6426	-0.32737	-0.723424	-0.776537	-1.276	0.814803	1.23046	1.16417	0.857238	0.903908	0.676155	-0.332732	0.10229	-1.54371	-1.02418	1.12367e-05	---	---	---	---	---	---	---	---	---	---	---	---
10538082	685	Atp6v0e2	1.28585	0.708548	1.7337	1.31729	0.909881	-0.583429	-0.312976	-0.708046	-0.766658	-0.73344	1.03191	0.43723	1.12388	0.630011	1.4391	-0.326265	-1.0505	-0.652852	-0.250519	-1.86048	-1.78215	-0.479527	0.0333829	-0.544277	-0.599657	1.12367e-05	NM_133764	RefSeq	Mus musculus ATPase, H+ transporting, lysosomal V0 subunit E2 (Atp6v0e2), mRNA.	FALSE	GO:0006810 // GO:0006811 // GO:0015986 // GO:0015991 // GO:0015992	transport // ion transport // ATP synthesis coupled proton transport // ATP hydrolysis coupled proton transport // proton transport	GO:0016020 // GO:0016021 // GO:0033179	membrane // integral to membrane // proton-transporting V-type ATPase, V0 domain	GO:0015078 // GO:0016787	hydrogen ion transmembrane transporter activity // hydrolase activity	---	---
10434932	13	Fam43a	0.907343	1.17103	0.996263	1.05192	0.976153	-0.736229	-0.772645	-1.55872	-2.05166	-1.61175	1.10842	0.887537	1.06355	1.23621	0.379658	-0.33501	-1.20114	-0.764807	0.16616	-1.08594	0.293513	0.136167	0.11965	-0.0838521	-0.29183	1.12367e-05	BC099947	GenBank	Mus musculus cDNA sequence BC022623, mRNA (cDNA clone MGC:107428 IMAGE:30088416), complete cds.	FALSE	---	---	---	---	---	---	---	---
10361834	2266	Txlnb	-0.411781	-0.684289	-0.981998	-0.633069	-0.466991	0.232682	0.766829	1.80288	1.90581	1.47556	-1.02877	-0.88155	-0.644659	-0.629722	-0.502804	0.779425	0.355086	1.464	1.14277	1.04428	-0.511137	-0.983022	-1.22123	-1.02627	-0.362037	1.14332e-05	NM_138628	RefSeq	Mus musculus taxilin beta (Txlnb), mRNA.	FALSE	GO:0008150	biological_process	GO:0005575	cellular_component	GO:0003674	molecular_function	---	---
10417912	1585	Usp54	0.00617204	-0.62319	-0.672097	-0.572196	-0.189179	0.854575	1.1014	1.985	1.42258	1.66283	-0.973825	-0.235478	-0.193139	-0.94146	-0.718536	0.376482	0.546321	1.12402	0.525582	1.05873	-0.854984	-0.867003	-1.53049	-1.39884	-0.893287	1.14332e-05	NM_030180	RefSeq	Mus musculus ubiquitin specific peptidase 54 (Usp54), mRNA.	FALSE	GO:0006511	ubiquitin-dependent protein catabolic process	---	---	GO:0004221	ubiquitin thiolesterase activity	---	---
10477052	1700	2310046K01Rik	-0.371059	-0.597527	-0.451306	-0.514477	-0.157603	1.0296	0.945225	0.963316	1.45874	2.14737	-0.0355576	-1.16431	-1.16624	-0.284927	-0.715117	0.556764	1.31058	0.941235	0.547585	0.930251	-1.04134	-1.37525	-0.767916	-0.945651	-1.24238	1.19951e-05	BC016127	GenBank	Mus musculus RIKEN cDNA 2310046K01 gene, mRNA (cDNA clone MGC:28879 IMAGE:4910227), complete cds.	FALSE	GO:0008150	biological_process	GO:0005575 // GO:0016020 // GO:0016021	cellular_component // membrane // integral to membrane	GO:0005515	protein binding	---	---
10464586	2049	Gstp2	-0.963926	-0.543337	-0.831788	-0.724621	-0.844125	0.918603	1.26667	1.56137	1.69629	1.83679	-1.35078	-1.56691	-0.629734	-0.700074	-0.145725	0.317555	0.000502809	0.854753	0.680534	1.08503	0.596396	-0.459922	-0.817194	-0.776173	-0.460183	1.20839e-05	NM_181796	RefSeq	Mus musculus glutathione S-transferase, pi 2 (Gstp2), mRNA.	FALSE	GO:0006749 // GO:0008152	glutathione metabolic process // metabolic process	---	---	GO:0004364 // GO:0016740	glutathione transferase activity // transferase activity	---	---
10560608	1597	Apoc2	-0.229661	-0.86491	-1.11441	-0.152482	-0.785387	1.04423	1.22544	2.01704	1.48999	0.854857	-0.557723	-0.79228	-0.507896	-0.953713	-0.308227	0.965747	0.371654	0.897756	0.494328	1.61251	-1.35699	-0.9568	-1.07726	-0.665787	-0.650031	1.20839e-05	NM_009695	RefSeq	Mus musculus apolipoprotein C-II (Apoc2), mRNA.	FALSE	GO:0006629 // GO:0006810 // GO:0006869 // GO:0008150 // GO:0016042	lipid metabolic process // transport // lipid transport // biological_process // lipid catabolic process	GO:0005575 // GO:0005576 // GO:0042627	cellular_component // extracellular region // chylomicron	GO:0003674 // GO:0005319 // GO:0008047	molecular_function // lipid transporter activity // enzyme activator activity	---	---
10362363	1813	6330407J23Rik	-0.101493	-0.842681	-1.26191	-0.146115	-0.545309	1.12841	1.05284	0.802214	1.49566	1.42488	0.12541	-1.21931	-1.78691	-1.03802	-1.21348	0.766228	0.880312	0.890709	0.83227	1.36333	-0.208708	-0.158668	-0.377493	-0.632357	-1.22982	1.25031e-05	NM_026138	RefSeq	Mus musculus RIKEN cDNA 6330407J23 gene (6330407J23Rik), mRNA.	FALSE	---	---	GO:0016020 // GO:0016021	membrane // integral to membrane	---	---	---	---
10459999	1697	Sall3	-0.578972	-0.440827	-0.97206	-0.579261	-0.728109	1.32111	1.11695	1.05239	1.76355	1.79351	-0.722252	-0.620683	-0.530695	-0.0983603	-0.391447	0.446148	1.55362	0.582552	0.29123	0.940584	-0.69825	-0.607539	-1.16303	-1.47323	-1.25692	1.25031e-05	NM_178280	RefSeq	Mus musculus sal-like 3 (Drosophila) (Sall3), mRNA.	FALSE	GO:0006350 // GO:0006355 // GO:0021891	transcription // regulation of transcription, DNA-dependent // olfactory bulb interneuron development	GO:0005622 // GO:0005634	intracellular // nucleus	GO:0003676 // GO:0003677 // GO:0008270 // GO:0046872	nucleic acid binding // DNA binding // zinc ion binding // metal ion binding	---	---
10389451	145	Med13	0.0438038	0.0988664	0.0119105	0.0930563	0.180679	-1.0773	-1.49322	-1.25195	-1.51595	-1.39606	0.540833	0.956086	0.767267	1.61501	1.45216	-0.0178062	-0.642729	-0.316706	-1.53052	-0.332004	2.01769	0.85138	0.1427	0.151584	0.651234	1.25031e-05	NM_001080931	RefSeq	Mus musculus mediator complex subunit 13 (Med13), mRNA.	FALSE	GO:0006350 // GO:0006355 // GO:0045944	transcription // regulation of transcription, DNA-dependent // positive regulation of transcription from RNA polymerase II promoter	GO:0000119 // GO:0005634	mediator complex // nucleus	GO:0003713	transcription coactivator activity	---	---
10451613	1837	Foxp4	-0.932173	-0.802532	-1.09406	-0.905792	-0.937066	1.58704	1.16491	1.02296	0.917422	1.07602	0.288869	-1.44769	-1.89036	-0.646757	-1.08515	0.286401	1.4344	0.853704	0.703166	1.16819	-0.609928	-0.182544	0.178756	-0.343753	0.195967	1.25911e-05	NM_001110824	RefSeq	Mus musculus forkhead box P4 (Foxp4), transcript variant 1, mRNA.	FALSE	GO:0000122 // GO:0006350 // GO:0006355 // GO:0007507 // GO:0048617	negative regulation of transcription from RNA polymerase II promoter // transcription // regulation of transcription, DNA-dependent // heart development // embryonic foregut morphogenesis	GO:0005622 // GO:0005634	intracellular // nucleus	GO:0003677 // GO:0003700 // GO:0008270 // GO:0016564 // GO:0042803 // GO:0043565 // GO:0046872 // GO:0046982	DNA binding // transcription factor activity // zinc ion binding // transcription repressor activity // protein homodimerization activity // sequence-specific DNA binding // metal ion binding // protein heterodimerization activity	---	---
10484894	1605	Ptprj	-0.187006	-0.842421	-0.216924	-0.213853	-0.405572	0.889103	1.25572	1.54073	1.17724	1.30182	-0.640774	-0.242012	-0.222781	-0.0810285	-0.169557	0.384879	0.982414	0.871564	0.426469	1.5174	-1.3413	-1.1986	-1.61205	-1.41706	-1.5564	1.29101e-05	NM_008982	RefSeq	Mus musculus protein tyrosine phosphatase, receptor type, J (Ptprj), transcript variant 1, mRNA.	FALSE	GO:0001570 // GO:0006470 // GO:0007507 // GO:0016311	vasculogenesis // protein amino acid dephosphorylation // heart development // dephosphorylation	GO:0016020 // GO:0016021	membrane // integral to membrane	GO:0004721 // GO:0004725 // GO:0004872 // GO:0016787 // GO:0016791	phosphoprotein phosphatase activity // protein tyrosine phosphatase activity // receptor activity // hydrolase activity // phosphatase activity	---	---
10366866	2129	Dctn2	-0.499362	-1.14389	-0.287935	-0.234544	-0.307115	0.661574	0.998415	1.54743	1.47606	1.20242	-0.873587	-0.52586	-0.0806983	-1.12054	0.176955	0.831945	0.931901	1.15511	0.698256	1.25007	-0.813111	-1.49081	-0.901331	-1.69117	-0.960187	1.32179e-05	NM_027151	RefSeq	Mus musculus dynactin 2 (Dctn2), mRNA.	FALSE	GO:0007017	microtubule-based process	GO:0005737 // GO:0005856 // GO:0005869 // GO:0005874 // GO:0016020 // GO:0030286 // GO:0030426	cytoplasm // cytoskeleton // dynactin complex // microtubule // membrane // dynein complex // growth cone	GO:0003774 // GO:0005515	motor activity // protein binding	---	---
10429772	2307	Eppk1	-0.975484	-1.69141	-0.908716	-0.883283	-0.697357	1.48609	1.00827	1.63627	1.73107	1.3107	-0.596972	-0.237411	-0.983356	-0.412016	-0.616918	0.188464	0.953457	0.977874	0.369353	1.24949	-0.732762	-0.420713	-0.958014	-0.417305	-0.379322	1.32454e-05	NM_144848	RefSeq	Mus musculus epiplakin 1 (Eppk1), mRNA.	FALSE	---	---	GO:0005737 // GO:0005856	cytoplasm // cytoskeleton	---	---	---	---
10563362	1902	Sphk2	-0.518402	-0.290348	-0.433016	-0.960626	-0.874292	0.909101	1.17598	1.45482	1.04469	2.13497	-0.25657	-0.617166	-1.51868	-1.01107	-0.950268	0.713158	0.827075	0.798489	0.497786	0.0026968	-1.10931	0.172199	0.857675	-1.71208	-0.336819	1.32889e-05	NM_020011	RefSeq	Mus musculus sphingosine kinase 2 (Sphk2), transcript variant 2, mRNA.	FALSE	GO:0001568 // GO:0006669 // GO:0006670 // GO:0006916 // GO:0007205 // GO:0007420 // GO:0008284	blood vessel development // sphinganine-1-phosphate biosynthetic process // sphingosine metabolic process // anti-apoptosis // activation of protein kinase C activity // brain development // positive regulation of cell proliferation	GO:0005624 // GO:0005829	membrane fraction // cytosol	GO:0000166 // GO:0004143 // GO:0005515 // GO:0005524 // GO:0008481 // GO:0016301 // GO:0016740 // GO:0017050 // GO:0017050	nucleotide binding // diacylglycerol kinase activity // protein binding // ATP binding // sphinganine kinase activity // kinase activity // transferase activity // D-erythro-sphingosine kinase activity // D-erythro-sphingosine kinase activity	GenMAPP	S1P_Signaling
10362372	1812	---	-0.144679	-0.838651	-0.977598	-0.325936	-0.481498	1.02549	0.766828	1.16288	1.82117	1.66594	0.135194	-0.53659	-1.39812	-0.853923	-1.31421	0.624936	0.88821	0.79908	0.677657	1.24985	-0.364898	-0.158232	-0.792525	-1.0965	-1.53388	1.34545e-05	ENSMUST00000092627	ENSEMBL	cdna:known chromosome:NCBIM37:10:28931501:28945307:1 gene:ENSMUSG00000004360	FALSE	---	---	---	---	---	---	---	---
10596893	216	Dag1	0.742271	1.11977	0.810877	0.590946	0.851671	-1.54512	-0.663012	-1.22064	-1.48198	-1.60534	1.37731	0.228925	0.657268	1.16429	0.263146	-0.490486	-1.19494	-0.336524	-0.487209	-1.70441	0.998412	0.746114	0.587624	-0.237862	0.828896	1.41126e-05	NM_010017	RefSeq	Mus musculus dystroglycan 1 (Dag1), mRNA.	FALSE	GO:0002011	morphogenesis of an epithelial sheet	GO:0005576 // GO:0005626 // GO:0005737 // GO:0005856 // GO:0005886 // GO:0016011 // GO:0016020 // GO:0016021 // GO:0042383 // GO:0045121	extracellular region // insoluble fraction // cytoplasm // cytoskeleton // plasma membrane // dystroglycan complex // membrane // integral to membrane // sarcolemma // membrane raft	GO:0005509 // GO:0005515	calcium ion binding // protein binding	---	---
10539850	1763	8430410A17Rik	-0.421077	-1.35343	-0.360851	-0.256423	-0.241275	0.86812	0.597546	0.726851	1.48307	1.16312	-0.422693	-0.633471	-0.983938	-0.989359	-1.56196	0.922175	1.80123	0.946054	0.669856	1.13466	-1.18323	-1.06902	0.249269	-1.45336	0.368145	1.41866e-05	BC024401	GenBank	Mus musculus RIKEN cDNA 8430410A17 gene, mRNA (cDNA clone MGC:36239 IMAGE:5026919), complete cds.	FALSE	---	---	---	---	---	---	---	---
10381872	924	Tlk2	1.0388	1.05823	0.879977	1.08982	1.26233	-0.945463	0.0411691	-1.26869	-0.799145	-0.649063	0.218641	0.837688	1.94865	1.57558	0.869976	-1.20588	-0.756736	-0.139639	-1.14185	-0.927284	-0.0830148	-0.146103	-0.790006	-0.765465	-1.20253	1.46221e-05	NM_001112705	RefSeq	Mus musculus tousled-like kinase 2 (Arabidopsis) (Tlk2), transcript variant A, mRNA.	FALSE	GO:0006468 // GO:0006974 // GO:0007049 // GO:0007275 // GO:0007283 // GO:0016568 // GO:0030154	protein amino acid phosphorylation // response to DNA damage stimulus // cell cycle // multicellular organismal development // spermatogenesis // chromatin modification // cell differentiation	GO:0005634	nucleus	GO:0000166 // GO:0004672 // GO:0004674 // GO:0005524 // GO:0016301 // GO:0016740	nucleotide binding // protein kinase activity // protein serine/threonine kinase activity // ATP binding // kinase activity // transferase activity	---	---
10394381	51	Atad2b	0.342234	0.611517	0.509325	0.115518	0.221709	-1.12147	-0.881401	-1.09483	-1.62086	-1.32827	1.04416	0.024951	1.42568	1.39141	2.24405	-0.65659	-0.94379	-0.738828	-0.809503	-1.05924	1.17668	0.500741	0.230616	0.0548798	0.361307	1.46665e-05	NM_001099628	RefSeq	Mus musculus ATPase family, AAA domain containing 2B (Atad2b), mRNA.	FALSE	---	---	---	---	---	---	---	---
10386992	1801	1700086D15Rik	-0.277988	-1.22617	-0.723724	-0.472411	0.00735624	1.03257	0.703471	0.484327	1.80818	1.68703	-0.807206	-0.448179	-0.62352	-0.597028	-1.35579	0.679818	1.51822	1.25035	1.0726	0.795641	-0.864478	-0.881928	-1.17986	-0.938453	-0.64282	1.48352e-05	ENSMUST00000020855	ENSEMBL	Novel protein gene:ENSMUSG00000020548	FALSE	---	---	---	---	---	---	---	---
10498871	2301	Tmem144	-1.04814	-0.45307	-0.871624	-0.835	-1.00909	0.26401	0.480477	2.06641	1.56681	1.57726	-0.707928	-0.834774	-0.939132	-1.01403	-0.738056	0.140352	1.25165	1.10985	0.771316	1.48445	-0.819613	-0.454683	-0.00635755	-0.688379	-0.292709	1.49324e-05	NM_027495	RefSeq	Mus musculus transmembrane protein 144 (Tmem144), mRNA.	FALSE	---	---	GO:0016020 // GO:0016021	membrane // integral to membrane	---	---	---	---
10391066	2269	Krt17	-0.3408	-1.07242	-0.334145	-0.452516	-0.594685	0.667755	0.850772	1.6205	1.3239	1.42708	-0.864167	-1.68145	-0.71384	-0.468277	-0.750242	0.802351	0.0433749	1.47456	0.657979	1.43503	-0.00656878	-0.788448	-0.614417	-1.80745	0.186114	1.59242e-05	NM_010663	RefSeq	Mus musculus keratin 17 (Krt17), mRNA.	FALSE	GO:0002009 // GO:0030307 // GO:0031424 // GO:0045109 // GO:0045727 // GO:0051798	morphogenesis of an epithelium // positive regulation of cell growth // keratinization // intermediate filament organization // positive regulation of translation // positive regulation of hair follicle development	GO:0005737 // GO:0005882	cytoplasm // intermediate filament	GO:0005198 // GO:0005515 // GO:0005515	structural molecule activity // protein binding // protein binding	---	---
10553473	970	---	1.28531	1.24102	1.15478	1.36047	1.30376	-0.643709	-0.473959	-0.75431	-0.63698	-0.60045	-0.445222	0.923197	1.82013	0.927087	1.38253	-0.628505	-0.680107	-0.393693	-0.689114	-1.01727	-0.428908	-0.764084	-0.963668	-1.16249	-1.11581	1.59242e-05	ENSMUST00000098416	ENSEMBL	cdna:pseudogene chromosome:NCBIM37:7:58409838:58410509:-1 gene:ENSMUSG00000074095	FALSE	---	---	---	---	---	---	---	---
10532937	49	Unc119b	0.655547	0.212486	0.707474	0.389983	0.895986	-1.2065	-0.540186	-0.56637	-1.84408	-1.25554	1.91425	0.49666	1.07262	0.545768	1.35162	-0.409617	-1.36404	-1.19161	-0.781104	-1.18957	0.845598	1.0377	-0.37333	0.655651	-0.0593825	1.59242e-05	NM_175352	RefSeq	Mus musculus unc-119 homolog B (C. elegans) (Unc119b), mRNA.	FALSE	---	---	---	---	---	---	---	---
10360028	1694	Fcgr2b	-0.695498	-0.150931	-0.824021	-0.939773	-0.78807	1.07845	0.830799	1.48562	1.75483	1.5394	-0.700186	-0.815035	-0.559611	-0.341678	-0.212718	0.851729	1.56485	0.625566	0.014912	1.195	-0.894171	-1.25518	-0.663121	-1.32899	-0.772192	1.61166e-05	NM_001077189	RefSeq	Mus musculus Fc receptor, IgG, low affinity IIb (Fcgr2b), transcript variant 1, mRNA.	FALSE	GO:0001811 // GO:0002862 // GO:0006911 // GO:0006952 // GO:0006955 // GO:0007166 // GO:0016064 // GO:0019886 // GO:0030889 // GO:0045576 // GO:0050766 // GO:0050777	negative regulation of type I hypersensitivity // negative regulation of inflammatory response to antigenic stimulus // phagocytosis, engulfment // defense response // immune response // cell surface receptor linked signal transduction // immunoglobulin mediated immune response // antigen processing and presentation of exogenous peptide antigen via MHC class II // negative regulation of B cell pr…	GO:0005576 // GO:0005737 // GO:0005856 // GO:0005886 // GO:0005887 // GO:0009897 // GO:0016020 // GO:0016021	extracellular region // cytoplasm // cytoskeleton // plasma membrane // integral to plasma membrane // external side of plasma membrane // membrane // integral to membrane	GO:0004872 // GO:0005057 // GO:0005515 // GO:0019864	receptor activity // receptor signaling protein activity // protein binding // IgG binding	---	---
10438603	1691	Igf2bp2	-0.975658	-0.862186	-0.635118	-0.845199	-0.583726	1.09574	1.01709	1.51846	1.36606	1.53318	-0.535455	-1.87653	-0.343653	-0.49575	0.111948	0.459399	0.982159	0.993108	0.614519	1.38424	-0.493157	-0.919017	-0.790185	-1.21834	-0.50192	1.6129e-05	NM_183029	RefSeq	Mus musculus insulin-like growth factor 2 mRNA binding protein 2 (Igf2bp2), mRNA.	FALSE	GO:0006417	regulation of translation	GO:0005737	cytoplasm	GO:0000166 // GO:0003676 // GO:0003723	nucleotide binding // nucleic acid binding // RNA binding	---	---
10390381	1376	Npepps	-1.55733	-0.266327	-1.29216	-1.48758	-1.38938	0.472968	0.495546	0.845729	0.75226	0.442267	-0.777477	-0.622093	-1.72975	-1.21737	0.0895765	0.924329	0.908185	1.55304	1.31414	0.588489	1.09427	-0.191495	-0.172318	0.392291	0.830188	1.6129e-05	NM_008942	RefSeq	Mus musculus aminopeptidase puromycin sensitive (Npepps), mRNA.	FALSE	GO:0006508	proteolysis	GO:0005634 // GO:0005737	nucleus // cytoplasm	GO:0004177 // GO:0008233 // GO:0008237 // GO:0008270 // GO:0016787 // GO:0046872	aminopeptidase activity // peptidase activity // metallopeptidase activity // zinc ion binding // hydrolase activity // metal ion binding	---	---
10527547	439	Gtf3a	0.66064	0.547948	1.04732	1.29753	0.877455	-1.74969	-1.21584	-0.701159	-1.25845	-0.869769	0.790841	0.848369	1.43422	0.305955	0.482033	-0.359049	-1.55312	-0.338878	-0.833282	-1.94189	0.183933	0.624409	0.613021	0.752892	0.35456	1.6129e-05	NM_025652	RefSeq	Mus musculus general transcription factor III A (Gtf3a), mRNA.	FALSE	GO:0006350 // GO:0006355	transcription // regulation of transcription, DNA-dependent	GO:0005622 // GO:0005634	intracellular // nucleus	GO:0003676 // GO:0003677 // GO:0003723 // GO:0008270 // GO:0046872	nucleic acid binding // DNA binding // RNA binding // zinc ion binding // metal ion binding	GenMAPP // GenMAPP // GenMAPP	GPCRDB_Class_A_Rhodopsin-like // Ribosomal_Proteins // RNA_transcription_Reactome
10512489	258	E130306D19Rik	0.207644	0.0374339	1.00811	0.623087	1.30667	-1.55163	-1.44908	-0.360637	-1.36197	-0.465832	0.885947	0.828716	0.781769	0.46412	0.808194	-0.805994	-1.8442	-1.11397	-0.736611	-1.15253	1.57885	0.858751	0.467578	0.699732	0.28586	1.6129e-05	BC080700	GenBank	Mus musculus RIKEN cDNA E130306D19 gene, mRNA (cDNA clone MGC:91189 IMAGE:30472977), complete cds.	FALSE	GO:0007242 // GO:0035023	intracellular signaling cascade // regulation of Rho protein signal transduction	GO:0005622	intracellular	GO:0005085 // GO:0005089	guanyl-nucleotide exchange factor activity // Rho guanyl-nucleotide exchange factor activity	---	---
10498180	29	Rfxap	0.190545	0.245487	0.701345	0.373852	0.359569	-1.32338	-0.138872	-1.50723	-0.861582	-0.623332	1.099	0.857339	1.00439	0.532387	1.34584	-0.766173	-1.26023	-1.23909	-1.32363	-1.64647	0.443096	1.01859	0.68336	1.74363	0.0915551	1.6129e-05	NM_133231	RefSeq	Mus musculus regulatory factor X-associated protein (Rfxap), mRNA.	FALSE	---	---	GO:0005634	nucleus	GO:0003677 // GO:0016563	DNA binding // transcription activator activity	---	---
10436608	2139	Cxadr	-1.25704	-1.02563	-0.717839	-0.739088	-1.04324	0.478748	0.762534	1.2064	1.99581	1.62119	-0.586087	-0.700434	-1.41856	-0.884346	-0.491825	0.628761	0.672051	0.642671	0.389306	1.85247	-1.07787	0.28097	-0.48103	0.218873	-0.326794	1.63393e-05	NM_009988	RefSeq	Mus musculus coxsackie virus and adenovirus receptor (Cxadr), transcript variant 2, mRNA.	FALSE	GO:0007005 // GO:0007155 // GO:0007507 // GO:0045216 // GO:0048739 // GO:0060044	mitochondrion organization // cell adhesion // heart development // cell-cell junction organization // cardiac muscle fiber development // negative regulation of cardiac muscle cell proliferation	GO:0005576 // GO:0005886 // GO:0005911 // GO:0005923 // GO:0016020 // GO:0016021 // GO:0030054	extracellular region // plasma membrane // cell-cell junction // tight junction // membrane // integral to membrane // cell junction	GO:0004872 // GO:0005515	receptor activity // protein binding	---	---
10563814	971	---	1.29472	1.25729	1.13157	1.34515	1.29091	-0.673368	-0.422483	-0.773466	-0.626181	-0.607579	-0.439854	0.916816	1.81887	0.92275	1.38863	-0.620854	-0.657398	-0.391076	-0.705149	-1.04833	-0.369659	-0.727914	-1.06264	-1.12858	-1.11217	1.63393e-05	ENSMUST00000098416	ENSEMBL	cdna:pseudogene chromosome:NCBIM37:7:58409838:58410509:-1 gene:ENSMUSG00000074095	FALSE	---	---	---	---	---	---	---	---
10549964	872	Zscan4c	1.31157	1.00313	1.03975	1.38321	1.17971	-0.495495	-0.281904	-1.26298	-0.505706	-0.360768	-0.0780756	0.976712	1.45346	0.909973	1.23353	-0.529543	-0.146823	-0.426519	-0.414621	-1.09043	-0.13296	-0.216836	-1.13888	-1.96955	-1.43996	1.63393e-05	NM_001013765	RefSeq	Mus musculus zinc finger and SCAN domain containing 4C (Zscan4c), mRNA.	FALSE	GO:0006350 // GO:0006355	transcription // regulation of transcription, DNA-dependent	GO:0005634	nucleus	GO:0008270 // GO:0046872	zinc ion binding // metal ion binding	---	---
10364375	1584	Cstb	-0.502161	-1.24389	-0.467956	-0.391191	-0.441938	0.678072	1.56875	1.74351	1.42459	1.24623	-1.00923	-0.396514	-0.223383	-0.71441	-0.0967044	0.641501	0.691006	1.00775	0.394996	1.48068	-0.848103	-0.867879	-1.50794	-1.07891	-1.08688	1.64559e-05	NM_007793	RefSeq	Mus musculus cystatin B (Cstb), mRNA.	FALSE	GO:0008344	adult locomotory behavior	GO:0005622 // GO:0005634 // GO:0005737	intracellular // nucleus // cytoplasm	GO:0002020 // GO:0004866 // GO:0004869	protease binding // endopeptidase inhibitor activity // cysteine protease inhibitor activity	---	---
10580957	1582	Slc38a7	-0.495553	-0.804157	-0.172214	-0.635485	-0.0800129	1.42534	1.07774	1.35623	1.56709	1.07804	-0.29858	-0.249869	0.0142982	-0.377802	-0.827842	0.680819	0.635995	1.31927	0.331788	0.512928	-2.57758	-1.27352	-1.05468	-0.65951	-0.492738	1.65512e-05	NM_172758	RefSeq	Mus musculus solute carrier family 38, member 7 (Slc38a7), mRNA.	FALSE	GO:0006810 // GO:0006811 // GO:0006814 // GO:0006865	transport // ion transport // sodium ion transport // amino acid transport	GO:0016020 // GO:0016021	membrane // integral to membrane	GO:0031402	sodium ion binding	---	---
10412155	21	Ddx4	0.608305	1.58388	0.669769	0.707495	0.71611	-1.016	-0.434634	-1.48521	-1.39617	-1.30849	1.10112	1.12664	0.557707	0.608227	1.23264	-0.73717	-0.76688	-0.444261	-0.645646	-2.32414	0.400338	0.486956	0.526378	0.257497	-0.0244664	1.65512e-05	NM_010029	RefSeq	Mus musculus DEAD (Asp-Glu-Ala-Asp) box polypeptide 4 (Ddx4), mRNA.	FALSE	GO:0007275 // GO:0032880	multicellular organismal development // regulation of protein localization	GO:0005634 // GO:0005737 // GO:0030529 // GO:0044464	nucleus // cytoplasm // ribonucleoprotein complex // cell part	GO:0000166 // GO:0003676 // GO:0004386 // GO:0005515 // GO:0005524 // GO:0008026 // GO:0016787	nucleotide binding // nucleic acid binding // helicase activity // protein binding // ATP binding // ATP-dependent helicase activity // hydrolase activity	GenMAPP	mRNA_processing_binding_Reactome
10397538	969	---	1.27596	0.971293	1.13139	1.63892	1.46401	-0.516451	-0.464819	-0.927888	-0.420622	-0.767086	-0.394382	0.816385	1.8296	0.968446	1.23287	-0.653942	-0.779404	-0.685279	-0.527729	-0.798557	-0.683739	-0.56485	-0.825191	-1.21198	-1.10696	1.66997e-05	GENSCAN00000045939	ENSEMBL	cdna:Genscan chromosome:NCBIM37:12:88815671:88822041:1	FALSE	---	---	---	---	---	---	---	---
10603425	1967	Glod5	-0.357849	-1.08898	-0.382616	-0.407614	-0.366561	0.390101	0.284239	1.50858	1.54301	1.67566	-1.45927	-0.475385	-1.00548	-1.69607	-1.5002	1.06555	0.972369	1.18997	0.529839	1.01605	-0.399924	-0.0647538	0.0234709	-1.03517	0.0410184	1.68437e-05	NM_027227	RefSeq	Mus musculus glyoxalase domain containing 5 (Glod5), mRNA.	FALSE	---	---	---	---	---	---	---	---
10434348	1606	Eif2b5	-0.36159	-0.567613	0.150885	-0.0777316	0.0423133	0.81841	0.827706	1.25663	1.66117	1.24262	-0.53579	-0.592357	-0.119317	-0.526949	-0.223722	0.405295	1.46901	0.763904	0.509315	1.12684	-1.05332	-1.41051	-1.44087	-1.80364	-1.56069	1.68437e-05	NM_172265	RefSeq	Mus musculus eukaryotic translation initiation factor 2B, subunit 5 epsilon (Eif2b5), mRNA.	FALSE	GO:0006412 // GO:0008150	translation // biological_process	GO:0005634 // GO:0005737 // GO:0005851	nucleus // cytoplasm // eukaryotic translation initiation factor 2B complex	GO:0003743 // GO:0005085 // GO:0005515 // GO:0016740	translation initiation factor activity // guanyl-nucleotide exchange factor activity // protein binding // transferase activity	GenMAPP	Translation_Factors
10546538	176	Suclg2	-0.171759	0.994848	0.284219	0.0497733	0.0662545	-0.814551	-0.488371	-1.0479	-1.13048	-0.949444	0.508833	0.285618	0.591032	0.0957345	0.855507	-1.03171	-1.06287	-1.02065	-1.15779	-1.74194	1.70325	1.35831	1.1151	1.43594	1.27305	1.68437e-05	NM_011507	RefSeq	Mus musculus succinate-Coenzyme A ligase, GDP-forming, beta subunit (Suclg2), mRNA.	FALSE	GO:0006099 // GO:0008152	tricarboxylic acid cycle // metabolic process	GO:0005739	mitochondrion	GO:0003824 // GO:0004776 // GO:0004777 // GO:0005524 // GO:0016874	catalytic activity // succinate-CoA ligase (GDP-forming) activity // succinate-semialdehyde dehydrogenase activity // ATP binding // ligase activity	GenMAPP	Krebs-TCA_Cycle
10427026	1147	Grasp	1.28763	1.70178	0.853861	0.825	1.02613	-1.52882	-1.10985	-0.594297	-1.10845	-0.562957	1.80779	-0.201179	0.685645	1.15193	0.979597	-0.830651	-0.461479	-0.583372	-0.796337	-1.15166	0.493581	-0.0240785	-1.29262	-0.575661	0.00848853	1.72678e-05	NM_019518	RefSeq	Mus musculus GRP1 (general receptor for phosphoinositides 1)-associated scaffold protein (Grasp), mRNA.	FALSE	GO:0006886 // GO:0007165	intracellular protein transport // signal transduction	GO:0005641 // GO:0005737 // GO:0005886 // GO:0005886 // GO:0016020	nuclear envelope lumen // cytoplasm // plasma membrane // plasma membrane // membrane	GO:0005515 // GO:0005515	protein binding // protein binding	---	---
10607497	175	Suclg2	-0.232928	1.04624	0.323497	0.043579	0.0856527	-0.863745	-0.51414	-1.08427	-1.13171	-0.939822	0.541254	0.28315	0.6161	0.0746195	0.868086	-1.03298	-1.04887	-1.07631	-1.09877	-1.68646	1.65543	1.34203	1.12531	1.47855	1.2265	1.72678e-05	NM_011507	RefSeq	Mus musculus succinate-Coenzyme A ligase, GDP-forming, beta subunit (Suclg2), mRNA.	FALSE	GO:0006099 // GO:0008152	tricarboxylic acid cycle // metabolic process	GO:0005739	mitochondrion	GO:0003824 // GO:0004776 // GO:0004777 // GO:0005524 // GO:0016874	catalytic activity // succinate-CoA ligase (GDP-forming) activity // succinate-semialdehyde dehydrogenase activity // ATP binding // ligase activity	GenMAPP	Krebs-TCA_Cycle
10361152	2048	Gstp2	-1.04604	-0.507402	-0.844384	-0.700421	-0.834431	0.958845	1.2061	1.62464	1.70031	1.79216	-1.30986	-1.56976	-0.617832	-0.713927	-0.121683	0.341718	-0.0938139	0.901242	0.579472	1.12779	0.581444	-0.417983	-0.775421	-0.844443	-0.416323	1.74065e-05	NM_181796	RefSeq	Mus musculus glutathione S-transferase, pi 2 (Gstp2), mRNA.	FALSE	GO:0006749 // GO:0008152	glutathione metabolic process // metabolic process	---	---	GO:0004364 // GO:0016740	glutathione transferase activity // transferase activity	---	---
10516544	275	Hpca	0.375702	1.34641	0.905114	1.40761	0.703431	-1.01238	-0.395287	-1.00603	-1.12322	-1.54368	1.29425	0.00184415	1.34542	1.43517	0.644106	-1.06506	-0.649395	-1.97466	-0.535899	-0.87461	0.396293	0.110781	-0.329625	0.37107	0.172643	1.74065e-05	NM_010471	RefSeq	Mus musculus hippocalcin (Hpca), mRNA.	FALSE	---	---	---	---	GO:0005509 // GO:0005515	calcium ion binding // protein binding	---	---
10427816	2310	Pdzd2	-0.452003	-0.624599	-0.868254	0.0916948	-0.204257	0.689279	0.88848	1.69868	1.4498	1.12886	-1.60138	-0.210011	-0.700819	-1.44519	-1.32317	0.233899	1.38282	1.15176	1.01111	1.00261	-1.19544	-0.339316	-0.210215	-0.680053	-0.874284	1.75543e-05	NM_001081064	RefSeq	Mus musculus PDZ domain containing 2 (Pdzd2), mRNA.	FALSE	---	---	GO:0030054	cell junction	GO:0005515	protein binding	---	---
10490665	1698	Stmn3	-0.365377	-0.468113	-0.909199	-0.314942	-0.531351	0.850268	0.75037	1.37069	1.48511	1.33265	-0.135409	-0.695754	-1.67258	-0.920301	-0.109183	0.687213	1.67773	0.856507	0.579401	1.39265	-0.741967	-1.20203	-1.04394	-0.934544	-0.937895	1.77506e-05	NM_009133	RefSeq	Mus musculus stathmin-like 3 (Stmn3), mRNA.	FALSE	GO:0007242 // GO:0031122 // GO:0031175 // GO:0032314 // GO:0035021 // GO:0051493	intracellular signaling cascade // cytoplasmic microtubule organization // neurite development // regulation of Rac GTPase activity // negative regulation of Rac protein signal transduction // regulation of cytoskeleton organization	GO:0005737	cytoplasm	GO:0019904	protein domain specific binding	---	---
10561153	1962	Cyp2b23	-0.627736	-1.74865	-1.00114	-0.689823	-0.757613	0.762707	0.770896	0.556138	1.26901	1.41517	-1.23185	-0.184304	-1.55909	-1.25314	-0.55637	0.282448	1.43139	0.763909	0.590493	0.441143	1.59733	0.945346	0.0449108	-0.493433	-0.767742	1.79218e-05	NM_001081148	RefSeq	Mus musculus cytochrome P450, family 2, subfamily b, polypeptide 23 (Cyp2b23), mRNA.	FALSE	---	---	---	---	---	---	---	---
10408593	1616	Serpinb6c	-0.611531	-0.438202	-0.398787	-0.626485	-0.594196	0.795832	0.903799	1.16117	1.4652	1.38255	-0.721714	-1.30312	-0.140145	-0.104564	0.355237	0.716122	1.14332	0.976313	0.608509	1.29186	-0.186414	-1.27202	-1.30877	-1.95472	-1.13924	1.79218e-05	NM_148942	RefSeq	Mus musculus serine (or cysteine) peptidase inhibitor, clade B, member 6c (Serpinb6c), mRNA.	FALSE	---	---	---	---	---	---	---	---
10506330	975	---	1.31318	1.01686	1.16832	1.51815	1.36901	-0.667138	-0.201928	-0.454974	-0.274208	-0.413627	-0.308225	0.766405	1.66361	0.988382	1.10256	-0.81675	-0.251519	-0.417808	-0.676633	-0.837908	-0.469635	-0.872017	-1.22842	-1.42422	-1.59147	1.79513e-05	ENSMUST00000075999	ENSEMBL	Novel protein similar to Prame proteins gene:ENSMUSG00000037028	FALSE	---	---	---	---	---	---	---	---
10538811	577	Prdm5	0.485525	1.01996	0.85338	0.332631	0.254586	-0.561302	-0.52355	-1.69955	-1.60641	-1.4964	1.03016	0.666795	1.32765	0.33185	0.147276	-0.795989	-0.764396	-0.933148	-0.816885	-1.65776	0.41268	0.62311	0.755152	1.49621	1.11844	1.79765e-05	NM_027547	RefSeq	Mus musculus PR domain containing 5 (Prdm5), mRNA.	FALSE	GO:0006350 // GO:0006355	transcription // regulation of transcription, DNA-dependent	GO:0005622 // GO:0005634	intracellular // nucleus	GO:0003676 // GO:0003677 // GO:0008270 // GO:0046872	nucleic acid binding // DNA binding // zinc ion binding // metal ion binding	---	---
10440406	119	Nrip1	1.04039	0.0203857	0.203906	0.572751	0.580816	-0.794356	-0.599379	-0.995352	-1.81199	-1.97034	0.280136	0.801178	1.12647	1.18421	1.65509	-0.591461	-0.512146	-1.00103	-0.907866	-1.21118	1.05379	1.31554	-0.00691461	0.396002	0.17136	1.79765e-05	NM_173440	RefSeq	Mus musculus nuclear receptor interacting protein 1 (Nrip1), mRNA.	FALSE	GO:0000122 // GO:0001543 // GO:0006350 // GO:0006355 // GO:0019915 // GO:0030728	negative regulation of transcription from RNA polymerase II promoter // ovarian follicle rupture // transcription // regulation of transcription, DNA-dependent // sequestering of lipid // ovulation	GO:0000118 // GO:0005634	histone deacetylase complex // nucleus	GO:0003714 // GO:0004872 // GO:0005102 // GO:0005515 // GO:0042826 // GO:0046965	transcription corepressor activity // receptor activity // receptor binding // protein binding // histone deacetylase binding // retinoid X receptor binding	GenMAPP	Ovarian_Infertility_Genes
10422067	1823	Fbxl3	0.119817	-1.12233	-0.528367	-0.503667	-0.852506	0.705996	0.805575	0.686958	2.00101	1.62554	-0.774315	-0.576416	-0.977771	-0.607251	-0.899068	0.780784	1.32477	0.701335	0.566526	1.77691	-0.540328	-0.939597	-1.11848	-0.77584	-0.879289	1.81277e-05	NM_015822	RefSeq	Mus musculus F-box and leucine-rich repeat protein 3 (Fbxl3), mRNA.	FALSE	GO:0006511 // GO:0008150	ubiquitin-dependent protein catabolic process // biological_process	GO:0005575 // GO:0005634 // GO:0005737	cellular_component // nucleus // cytoplasm	GO:0003674 // GO:0005515	molecular_function // protein binding	---	---
10420957	1208	Ptk2b	-0.961331	-1.32302	-1.09312	-0.835658	-0.538209	0.617638	0.726995	0.883596	-0.0662202	0.416367	-0.732369	-0.261142	-1.25925	-1.19036	-2.24049	1.04348	1.0543	1.26777	1.22467	1.235	1.02757	-0.214092	0.638469	0.0278428	0.551557	1.81277e-05	NM_172498	RefSeq	Mus musculus PTK2 protein tyrosine kinase 2 beta (Ptk2b), mRNA.	FALSE	GO:0006468 // GO:0007172	protein amino acid phosphorylation // signal complex assembly	GO:0005737 // GO:0005856 // GO:0005886 // GO:0005925 // GO:0016020	cytoplasm // cytoskeleton // plasma membrane // focal adhesion // membrane	GO:0000166 // GO:0004672 // GO:0004713 // GO:0004715 // GO:0004871 // GO:0005515 // GO:0005524 // GO:0016301 // GO:0016740	nucleotide binding // protein kinase activity // protein tyrosine kinase activity // non-membrane spanning protein tyrosine kinase activity // signal transducer activity // protein binding // ATP binding // kinase activity // transferase activity	---	---
10359948	1139	Uap1	1.20455	1.719	1.56709	1.37379	0.812967	-0.893354	-0.731293	-1.2023	-1.15725	-1.11725	-0.231372	0.707087	1.64199	0.779161	1.00355	-0.270464	-1.11314	-0.408958	-0.550924	-1.0832	0.0189401	-0.0203162	-0.72241	-0.697657	-0.62825	1.81277e-05	NM_133806	RefSeq	Mus musculus UDP-N-acetylglucosamine pyrophosphorylase 1 (Uap1), mRNA.	FALSE	GO:0008152	metabolic process	GO:0005737	cytoplasm	GO:0003977 // GO:0016740 // GO:0016779	UDP-N-acetylglucosamine diphosphorylase activity // transferase activity // nucleotidyltransferase activity	---	---
10421768	1109	Akap11	1.12644	1.52959	0.408191	0.491714	0.863501	-0.516791	-0.360303	-0.839998	-1.59459	-0.901074	1.35892	1.22291	1.24067	1.57861	0.887666	-1.08082	0.415017	-0.593581	-1.15579	-0.930758	-1.0769	-1.10012	-0.275614	-0.21566	-0.481215	1.81277e-05	AK129178	GenBank	Mus musculus mRNA for mKIAA0629 protein.	FALSE	GO:0008150	biological_process	GO:0005777	peroxisome	GO:0019207	kinase regulator activity	---	---
10549972	871	Zscan4c	1.26877	1.03052	1.02314	1.39838	1.20471	-0.494191	-0.263475	-1.29541	-0.46366	-0.351675	-0.0666151	0.98066	1.40797	0.936026	1.16282	-0.513741	-0.14243	-0.438121	-0.315824	-1.11561	-0.12858	-0.208281	-1.14956	-2.01537	-1.45045	1.81277e-05	NM_001013765	RefSeq	Mus musculus zinc finger and SCAN domain containing 4C (Zscan4c), mRNA.	FALSE	GO:0006350 // GO:0006355	transcription // regulation of transcription, DNA-dependent	GO:0005634	nucleus	GO:0008270 // GO:0046872	zinc ion binding // metal ion binding	---	---
10392440	473	Slc16a6	0.58983	0.889212	0.236155	0.255131	0.905401	-1.08446	-0.349184	-1.19639	-1.31468	-0.486581	-0.0698954	0.559807	0.465709	0.891818	-0.0730161	-1.11196	-1.09273	-0.89418	-0.924855	-1.8341	0.314457	1.25295	2.2035	0.640668	1.2274	1.81277e-05	NM_001029842	RefSeq	Mus musculus solute carrier family 16 (monocarboxylic acid transporters), member 6 (Slc16a6), transcript variant 1, mRNA.	FALSE	GO:0008150	biological_process	GO:0005575	cellular_component	GO:0003674	molecular_function	---	---
10494208	1578	Fam63a	-0.127676	-0.87915	-0.0592775	-0.0659225	0.111214	0.915457	0.732975	1.62496	1.68487	1.59032	-0.308841	-0.63249	-0.791511	-0.586288	-1.50094	0.300228	0.970958	0.688165	0.716681	1.09405	-0.433953	-0.791312	-1.41636	-1.53819	-1.29797	1.86096e-05	BC094388	GenBank	Mus musculus RIKEN cDNA 4930504E06 gene, mRNA (cDNA clone MGC:106429 IMAGE:5708548), complete cds.	FALSE	GO:0008150	biological_process	GO:0005575	cellular_component	GO:0003674	molecular_function	---	---
10575153	495	Cyb5b	0.707603	1.19846	0.593239	0.85233	1.11569	-1.42199	-1.0663	-0.865024	-0.651958	-0.59548	1.09508	1.24016	-0.248853	1.19638	0.225736	-0.656516	-0.800805	-0.945497	-1.95768	-1.73173	0.326169	0.246359	0.984934	0.866399	0.293287	1.89948e-05	NM_025558	RefSeq	Mus musculus cytochrome b5 type B (Cyb5b), nuclear gene encoding mitochondrial protein, mRNA.	FALSE	GO:0006810 // GO:0022900	transport // electron transport chain	GO:0005739 // GO:0005741 // GO:0005743 // GO:0016020 // GO:0016021	mitochondrion // mitochondrial outer membrane // mitochondrial inner membrane // membrane // integral to membrane	GO:0005506 // GO:0020037 // GO:0046872 // GO:0046914	iron ion binding // heme binding // metal ion binding // transition metal ion binding	---	---
10437687	2166	Litaf	-1.46559	-0.522678	-0.754763	-1.01613	-1.09272	0.578268	0.918173	2.18726	1.3253	0.925516	-0.280268	-1.04042	-1.02127	-1.49094	-0.256329	0.743252	0.912245	0.846157	0.351298	1.55794	0.10185	-0.673722	-0.770415	-0.078527	0.0165068	1.93567e-05	NM_019980	RefSeq	Mus musculus LPS-induced TN factor (Litaf), mRNA.	FALSE	GO:0006350 // GO:0006355 // GO:0006915	transcription // regulation of transcription, DNA-dependent // apoptosis	GO:0005764 // GO:0016020	lysosome // membrane	GO:0005515	protein binding	---	---
10438091	2308	2610318N02Rik	-0.686062	-1.54965	-0.459463	-0.355165	-0.592168	1.05992	1.04665	1.64006	1.5829	1.77042	-1.44754	-0.308645	-1.46144	-0.661852	-0.844338	0.207638	0.873101	0.966517	-0.0520443	1.26194	-0.772746	-0.252892	-0.420285	-0.488079	-0.0567875	1.96107e-05	BC039993	GenBank	Mus musculus RIKEN cDNA 2610318N02 gene, mRNA (cDNA clone MGC:48115 IMAGE:1446463), complete cds.	FALSE	---	---	---	---	---	---	---	---
10421100	1403	Nefm	-0.259906	-0.927459	-0.51101	-0.742624	-0.539372	0.719776	1.29402	1.18378	0.785996	0.00237854	-0.846564	-0.285596	-0.669414	-1.29713	-1.37842	0.871032	1.94413	1.47945	1.02855	1.5595	-1.16544	-0.386279	-0.481149	-0.583492	-0.794757	1.96107e-05	NM_008691	RefSeq	Mus musculus neurofilament, medium polypeptide (Nefm), mRNA.	FALSE	GO:0000226 // GO:0008088 // GO:0031133 // GO:0045104 // GO:0045110 // GO:0060052 // GO:0060052	microtubule cytoskeleton organization // axon cargo transport // regulation of axon diameter // intermediate filament cytoskeleton organization // intermediate filament bundle assembly // neurofilament cytoskeleton organization // neurofilament cytoskeleton organization	GO:0005882 // GO:0005883 // GO:0030424 // GO:0031594	intermediate filament // neurofilament // axon // neuromuscular junction	GO:0005198	structural molecule activity	---	---
10378833	551	Ssh2	0.0322092	0.632529	0.193451	0.161407	-0.335064	-1.07106	-1.33903	-0.970302	-1.06964	-0.449959	1.33397	1.51326	1.20106	1.41195	1.0303	-0.740873	-0.953135	-0.371466	-1.38105	-1.13695	1.85146	0.36049	-0.485884	0.950305	-0.367989	1.96107e-05	NM_177710	RefSeq	Mus musculus slingshot homolog 2 (Drosophila) (Ssh2), mRNA.	FALSE	GO:0006470 // GO:0016311	protein amino acid dephosphorylation // dephosphorylation	GO:0005737 // GO:0005856 // GO:0030054	cytoplasm // cytoskeleton // cell junction	GO:0003779 // GO:0004721 // GO:0004725 // GO:0008138 // GO:0016787 // GO:0016791	actin binding // phosphoprotein phosphatase activity // protein tyrosine phosphatase activity // protein tyrosine/serine/threonine phosphatase activity // hydrolase activity // phosphatase activity	---	---
10476326	1802	Cds2	-0.0498271	-1.87985	-0.408523	-0.369967	-0.0212191	0.879064	0.66879	1.00738	1.44283	1.57837	-0.822607	-0.67538	-0.790314	-0.403853	-1.38362	1.10207	1.03449	1.21199	0.92288	1.023	-0.365752	-0.813064	-0.6801	-1.39707	-0.809713	1.96256e-05	NM_138651	RefSeq	Mus musculus CDP-diacylglycerol synthase (phosphatidate cytidylyltransferase) 2 (Cds2), mRNA.	FALSE	GO:0008654	phospholipid biosynthetic process	GO:0005739 // GO:0005743 // GO:0005783 // GO:0016020 // GO:0016021	mitochondrion // mitochondrial inner membrane // endoplasmic reticulum // membrane // integral to membrane	GO:0004605 // GO:0016740 // GO:0016772 // GO:0016779	phosphatidate cytidylyltransferase activity // transferase activity // transferase activity, transferring phosphorus-containing groups // nucleotidyltransferase activity	---	---
10561008	1688	Ceacam1	-0.633946	-0.762289	-0.877362	-0.721996	-0.971938	0.635415	0.809851	0.941518	1.62503	1.87978	-0.128985	-1.07505	-0.436229	-0.169815	-0.166923	0.391282	1.53376	0.938335	0.703333	1.20401	0.0344169	-1.19818	-1.35789	-1.42904	-0.767087	2.00306e-05	NM_001039185	RefSeq	Mus musculus carcinoembryonic antigen-related cell adhesion molecule 1 (Ceacam1), transcript variant 1, mRNA.	FALSE	GO:0043406 // GO:0044419	positive regulation of MAP kinase activity // interspecies interaction between organisms	GO:0005886 // GO:0016020 // GO:0016021	plasma membrane // membrane // integral to membrane	GO:0004872	receptor activity	---	---
10404055	1066	Hist1h1t	0.361309	0.277686	0.561839	1.13822	0.371293	-0.25936	-0.994945	-0.715375	-0.773927	-0.793515	1.37042	0.213168	0.895837	1.31783	0.605269	-0.80281	-1.39209	-1.09891	-0.39937	-0.865204	2.66941	0.725564	-1.02421	-0.529924	-0.858205	2.01372e-05	NM_010377	RefSeq	Mus musculus histone cluster 1, H1t (Hist1h1t), mRNA.	FALSE	GO:0006334 // GO:0007275 // GO:0007283 // GO:0007339 // GO:0030154 // GO:0030317	nucleosome assembly // multicellular organismal development // spermatogenesis // binding of sperm to zona pellucida // cell differentiation // sperm motility	GO:0000786 // GO:0005622 // GO:0005634 // GO:0005694	nucleosome // intracellular // nucleus // chromosome	GO:0003677	DNA binding	---	---
10526743	98	Cops6	0.495411	0.487298	1.31751	1.42184	1.34181	-0.708807	-0.783555	-1.6778	-1.09529	-0.982668	0.63341	1.42391	0.845604	0.00570088	0.189618	-0.464616	-1.02369	-1.04513	-0.910111	-1.90542	0.268954	1.14515	0.484017	0.498264	0.0385926	2.01372e-05	NM_012002	RefSeq	Mus musculus COP9 (constitutive photomorphogenic) homolog, subunit 6 (Arabidopsis thaliana) (Cops6), mRNA.	FALSE	---	---	GO:0005634 // GO:0005737 // GO:0008180	nucleus // cytoplasm // signalosome	GO:0005515	protein binding	---	---
10465282	442	Pola2	0.678892	0.372907	0.84324	0.772727	0.647025	-1.29411	-0.711282	-0.698547	-1.82806	-1.31504	1.36034	0.989434	0.492814	0.479344	0.208981	-0.941543	-1.33382	-0.129385	-0.76945	-1.89037	0.389563	0.924909	0.677125	1.28489	0.789404	2.02901e-05	NM_008893	RefSeq	Mus musculus polymerase (DNA directed), alpha 2 (Pola2), mRNA.	FALSE	GO:0000060 // GO:0006260	protein import into nucleus, translocation // DNA replication	GO:0005634 // GO:0005658	nucleus // alpha DNA polymerase:primase complex	GO:0003677 // GO:0003887 // GO:0005515 // GO:0046982	DNA binding // DNA-directed DNA polymerase activity // protein binding // protein heterodimerization activity	GenMAPP // GenMAPP	DNA_replication_Reactome // G1_to_S_cell_cycle_Reactome
10544746	209	Hoxa1	-0.433437	0.928013	0.726729	0.265299	0.542731	-0.612819	-1.16052	-1.58569	-1.83855	-0.985206	0.969999	0.738041	1.45615	0.601499	0.606675	-0.970884	-0.372707	-1.41833	-0.769819	-0.606503	-0.148407	1.68244	1.19021	0.376917	0.818165	2.02901e-05	NM_010449	RefSeq	Mus musculus homeo box A1 (Hoxa1), mRNA.	FALSE	GO:0006350 // GO:0006355 // GO:0006357 // GO:0007275 // GO:0007399 // GO:0008045 // GO:0009653 // GO:0009952 // GO:0009952 // GO:0021569 // GO:0021569 // GO:0021570 // GO:0021570 // GO:0021571 // GO:0021571 // GO:0021612 // GO:0021754 // GO:0021953 // GO:0030902 // GO:0042472 // GO:0045449 // GO:0048646	transcription // regulation of transcription, DNA-dependent // regulation of transcription from RNA polymerase II promoter // multicellular organismal development // nervous system development // motor axon guidance // anatomical structure morphogenesis // anterior/posterior pattern formation // anterior/posterior pattern formation // rhombomere 3 development // rhombomere 3 development // rhombo…	GO:0005634	nucleus	GO:0003677 // GO:0003700 // GO:0043565	DNA binding // transcription factor activity // sequence-specific DNA binding	---	---
10446473	1689	Lama1	-1.09969	-0.323635	-0.936873	-1.09214	-0.939381	0.79443	0.659164	1.55346	1.69911	1.52147	-0.199995	-1.30581	-0.755918	-0.450515	-0.186518	0.667377	1.67027	0.894313	0.25212	1.20933	-0.859564	-0.883002	-0.316197	-0.989715	-0.582105	2.07794e-05	NM_008480	RefSeq	Mus musculus laminin, alpha 1 (Lama1), mRNA.	FALSE	GO:0002011 // GO:0007155 // GO:0007166 // GO:0009888 // GO:0030155 // GO:0030334 // GO:0045198 // GO:0045995	morphogenesis of an epithelial sheet // cell adhesion // cell surface receptor linked signal transduction // tissue development // regulation of cell adhesion // regulation of cell migration // establishment of epithelial cell apical/basal polarity // regulation of embryonic development	GO:0005576 // GO:0005578 // GO:0005604 // GO:0005605 // GO:0005606 // GO:0031012	extracellular region // proteinaceous extracellular matrix // basement membrane // basal lamina // laminin-1 complex // extracellular matrix	GO:0005102 // GO:0005201 // GO:0005515	receptor binding // extracellular matrix structural constituent // protein binding	---	---
10514352	1227	Elavl2	-1.37481	-0.68502	-1.18831	-0.713769	-1.39214	0.354507	0.130748	1.10598	1.27717	1.21644	-1.52699	-1.24595	-1.02961	-1.32351	-0.351742	0.068452	1.05047	0.726166	-0.053002	1.09302	0.750147	0.845986	0.549195	0.311347	1.40522	2.14325e-05	NM_207685	RefSeq	Mus musculus ELAV (embryonic lethal, abnormal vision, Drosophila)-like 2 (Hu antigen B) (Elavl2), transcript variant 1, mRNA.	FALSE	---	---	---	---	GO:0000166 // GO:0003676 // GO:0003723	nucleotide binding // nucleic acid binding // RNA binding	---	---
10542677	47	Etnk1	0.484091	0.654468	0.645564	0.564193	0.483309	-1.20348	-0.821408	-0.956072	-1.05529	-1.20335	2.12091	0.447615	0.809345	1.83785	1.06832	-0.703246	-0.871626	-0.0203219	-0.487342	-1.70201	0.706254	-0.17468	-1.30895	0.465918	0.219932	2.22797e-05	AK031560	GenBank HTC	Mus musculus 13 days embryo male testis cDNA, RIKEN full-length enriched library, clone:6030452M24 product:ETHANOLAMINE KINASE (EC 2.7.1.82) (EKI) homolog [Homo sapiens], full insert sequence.	FALSE	---	---	GO:0005737	cytoplasm	GO:0004305 // GO:0016301 // GO:0016740	ethanolamine kinase activity // kinase activity // transferase activity	---	---
10462454	752	Uhrf2	0.609727	0.37093	1.33733	0.482251	0.357946	-1.01497	-0.370328	-0.139995	-1.7899	-1.56583	0.797074	1.12646	1.54368	0.610076	1.61127	-1.13098	-1.02093	-0.645407	-1.17825	-1.33796	0.223352	0.550263	-0.444724	0.868341	0.150571	2.24676e-05	NM_144873	RefSeq	Mus musculus ubiquitin-like, containing PHD and RING finger domains 2 (Uhrf2), mRNA.	FALSE	GO:0006464 // GO:0006511 // GO:0007049 // GO:0008283 // GO:0030154 // GO:0051865	protein modification process // ubiquitin-dependent protein catabolic process // cell cycle // cell proliferation // cell differentiation // protein autoubiquitination	GO:0005634	nucleus	GO:0003677 // GO:0004842 // GO:0005515 // GO:0008270 // GO:0016874 // GO:0046872	DNA binding // ubiquitin-protein ligase activity // protein binding // zinc ion binding // ligase activity // metal ion binding	---	---
10443854	1702	Cyp4f39	-0.695639	-0.990296	-0.603529	-1.06967	-0.796778	0.837879	0.881469	1.58889	1.99479	1.80205	-0.77118	-0.623655	-0.506379	-0.400522	-0.019163	0.545856	0.691617	0.876656	0.321571	1.30951	-0.229324	-0.881844	-0.971446	-1.14733	-1.14354	2.29088e-05	NM_177307	RefSeq	Mus musculus cytochrome P450, family 4, subfamily f, polypeptide 39 (Cyp4f39), mRNA.	FALSE	---	---	---	---	---	---	---	---
10420631	1192	Ebpl	0.735545	0.856573	1.11049	0.711179	0.39792	-1.27771	-1.24793	-0.413706	-1.32922	-0.173406	1.48177	0.0813914	1.57886	0.452478	1.48939	-1.1019	-0.977285	-0.518395	-1.29325	-1.26157	1.46836	0.352419	-0.683752	-0.274224	-0.164009	2.31908e-05	NM_026598	RefSeq	Mus musculus emopamil binding protein-like (Ebpl), mRNA.	FALSE	GO:0016125	sterol metabolic process	GO:0005783 // GO:0016020 // GO:0016021	endoplasmic reticulum // membrane // integral to membrane	GO:0047750	cholestenol delta-isomerase activity	---	---
10531437	1932	Scarb2	-1.0331	-0.732377	-0.72791	-0.944155	-0.962005	0.273441	0.212357	0.642365	1.32829	1.02923	-0.943394	-0.549431	-0.770608	-1.19085	-1.49118	0.744766	2.45688	1.20646	0.568692	1.47642	0.207912	-0.652549	0.0857853	-0.443255	0.208227	2.33083e-05	NM_007644	RefSeq	Mus musculus scavenger receptor class B, member 2 (Scarb2), mRNA.	FALSE	GO:0007155	cell adhesion	GO:0005764 // GO:0016020 // GO:0016021	lysosome // membrane // integral to membrane	GO:0004872 // GO:0005515	receptor activity // protein binding	---	---
10488264	1009	Calcoco2	1.05647	0.354522	1.17584	1.18979	0.877069	-1.17376	-0.731233	-0.536777	-1.37496	-0.664398	0.637349	0.0504246	1.86278	1.62156	1.31303	-0.436647	-0.915388	-0.786852	-0.119806	-1.04305	0.13651	-0.387022	-0.100592	-1.86491	-0.139947	2.33083e-05	ENSMUST00000006215	ENSEMBL	26 kDa protein gene:ENSMUSG00000006056	FALSE	GO:0008150	biological_process	GO:0005737 // GO:0005794 // GO:0005856 // GO:0016605	cytoplasm // Golgi apparatus // cytoskeleton // PML body	GO:0003674	molecular_function	---	---
10566714	959	Ric3	1.54892	0.376713	1.20963	1.50349	1.08317	-0.593164	-0.397457	-0.237256	-0.709081	-0.587772	0.281666	0.939537	1.91348	0.617306	1.14967	-0.957685	-0.488312	-0.669984	-0.657094	-1.78833	-0.140175	-0.35611	-1.20152	-0.529484	-1.31014	2.33083e-05	NM_001038624	RefSeq	Mus musculus resistance to inhibitors of cholinesterase 3 homolog (C. elegans) (Ric3), transcript variant 1, mRNA.	FALSE	---	---	GO:0005783 // GO:0016020 // GO:0016021	endoplasmic reticulum // membrane // integral to membrane	---	---	---	---
10559978	870	Zscan4c	1.26697	1.03707	1.0356	1.37297	1.18364	-0.486052	-0.24465	-1.34622	-0.457939	-0.326643	-0.0486558	0.987809	1.29047	0.942807	1.16115	-0.485324	-0.079307	-0.416082	-0.241408	-1.06529	-0.128102	-0.183065	-1.18638	-2.08287	-1.50049	2.33083e-05	NM_001013765	RefSeq	Mus musculus zinc finger and SCAN domain containing 4C (Zscan4c), mRNA.	FALSE	GO:0006350 // GO:0006355	transcription // regulation of transcription, DNA-dependent	GO:0005634	nucleus	GO:0008270 // GO:0046872	zinc ion binding // metal ion binding	---	---
10464583	2050	Gstp1	-1.14563	-0.612721	-0.736873	-0.523091	-0.604638	0.69249	0.482709	1.26215	1.66774	2.18608	-1.70632	-1.38341	-0.95104	-0.705551	-0.829241	0.00472448	0.0243481	0.72775	0.738749	0.713319	1.56279	-0.0884587	-0.143227	-0.532154	-0.100495	2.48004e-05	NM_013541	RefSeq	Mus musculus glutathione S-transferase, pi 1 (Gstp1), mRNA.	FALSE	GO:0006749 // GO:0008152	glutathione metabolic process // metabolic process	---	---	GO:0004364 // GO:0016740	glutathione transferase activity // transferase activity	---	---
10471036	2287	Dolpp1	-0.46244	-1.37063	-0.42465	-0.719145	-0.0744271	0.803004	1.19582	1.7497	1.13081	1.83812	-0.0632978	-0.527459	-1.61544	-0.995579	-1.4623	0.500944	0.326746	0.905303	0.785471	1.20754	-0.485878	-0.429242	-0.252699	-1.24686	-0.313399	2.55011e-05	NM_020329	RefSeq	Mus musculus dolichyl pyrophosphate phosphatase 1 (Dolpp1), mRNA.	FALSE	GO:0006487	protein amino acid N-linked glycosylation	GO:0005783 // GO:0016020 // GO:0016021 // GO:0030176	endoplasmic reticulum // membrane // integral to membrane // integral to endoplasmic reticulum membrane	GO:0003824 // GO:0016787 // GO:0047874	catalytic activity // hydrolase activity // dolichyldiphosphatase activity	---	---
10500133	1210	Prune	-0.789695	-1.34431	-0.312381	-0.312618	-0.316314	1.11096	0.687944	1.56941	1.27111	0.876174	-0.341098	-1.55867	-1.53177	-1.3843	-1.22642	0.469761	-0.0826786	1.19377	0.438979	1.48547	0.331583	0.100871	0.725321	-1.2876	0.226502	2.62991e-05	NM_173347	RefSeq	Mus musculus prune homolog (Drosophila) (Prune), mRNA.	FALSE	GO:0005975	carbohydrate metabolic process	GO:0005634 // GO:0005737 // GO:0030054	nucleus // cytoplasm // cell junction	GO:0004427 // GO:0004553 // GO:0016462 // GO:0016787 // GO:0030145 // GO:0046872	inorganic diphosphatase activity // hydrolase activity, hydrolyzing O-glycosyl compounds // pyrophosphatase activity // hydrolase activity // manganese ion binding // metal ion binding	---	---
10415472	790	Rnf17	1.02783	1.48431	1.26857	0.750432	1.0882	-1.52573	-0.311119	-1.40383	-1.75064	-0.810228	0.290698	0.330448	1.08611	0.400233	1.43683	-1.54427	-0.529728	-0.457087	-0.491983	-1.37711	0.662571	-0.132315	-0.0830927	0.391396	0.199514	2.64833e-05	NM_001033043	RefSeq	Mus musculus ring finger protein 17 (Rnf17), mRNA.	FALSE	GO:0007275 // GO:0007283 // GO:0007286 // GO:0030154	multicellular organismal development // spermatogenesis // spermatid development // cell differentiation	GO:0005634 // GO:0005737	nucleus // cytoplasm	GO:0003676 // GO:0005515 // GO:0008270 // GO:0042803 // GO:0046872	nucleic acid binding // protein binding // zinc ion binding // protein homodimerization activity // metal ion binding	---	---
10458386	269	Ndufa2	0.444085	1.28847	1.48183	1.40058	1.40009	-0.689468	-0.554728	-0.954361	-0.692117	-0.0553119	1.02583	0.879181	0.621437	0.373585	0.269989	-0.254633	-1.89351	-0.72219	-2.17216	-1.37916	-0.205253	-0.134211	0.572719	0.323529	-0.374219	2.69189e-05	NM_010885	RefSeq	Mus musculus NADH dehydrogenase (ubiquinone) 1 alpha subcomplex, 2 (Ndufa2), mRNA.	FALSE	GO:0006810 // GO:0022900	transport // electron transport chain	GO:0005739 // GO:0005743 // GO:0005746 // GO:0005747 // GO:0016020	mitochondrion // mitochondrial inner membrane // mitochondrial respiratory chain // mitochondrial respiratory chain complex I // membrane	GO:0008137	NADH dehydrogenase (ubiquinone) activity	GenMAPP	Electron_Transport_Chain
10466976	2005	Gldc	-1.26473	-1.66196	-0.355577	-0.782438	-0.61228	1.27229	1.31552	1.56864	1.09214	0.812711	-1.68165	-1.13332	-0.109882	-1.7784	-0.772606	0.213481	0.0697283	0.718895	0.56971	1.17641	0.367789	0.141409	0.404007	-0.166286	0.596384	2.85731e-05	NM_138595	RefSeq	Mus musculus glycine decarboxylase (Gldc), mRNA.	FALSE	GO:0006544 // GO:0019464 // GO:0055114	glycine metabolic process // glycine decarboxylation via glycine cleavage system // oxidation reduction	GO:0005739	mitochondrion	GO:0003824 // GO:0004375 // GO:0016491 // GO:0030170 // GO:0042803	catalytic activity // glycine dehydrogenase (decarboxylating) activity // oxidoreductase activity // pyridoxal phosphate binding // protein homodimerization activity	---	---
10473543	1602	Pramel6	-0.375539	-0.863707	-0.3104	-0.156	-0.0708647	0.958724	1.32455	1.24876	1.40036	1.23618	-1.11202	-0.594077	0.0633248	0.422071	-0.639612	0.709927	1.04133	0.737135	0.568255	1.17289	-1.14077	-1.34967	-1.52926	-1.50168	-1.23992	2.88471e-05	NM_178249	RefSeq	Mus musculus preferentially expressed antigen in melanoma like 6 (Pramel6), mRNA.	FALSE	---	---	---	---	---	---	---	---
10582549	1414	---	-0.942762	-1.26348	-1.33491	-1.01531	-1.33281	0.915222	0.841016	0.838027	0.76531	0.365577	-1.01539	1.13207	-0.854476	-0.223593	-0.908388	1.42558	1.67113	1.14919	1.22334	0.964831	-0.568767	-0.0718889	-0.710383	-0.319122	-0.730026	2.89324e-05	U63133	GenBank	Mus musculus C-type ecotropic endogenous retrovirus, complete mRNA sequence.	TRUE	---	---	---	---	---	---	---	---
10500122	1209	Bnipl	-0.67964	-1.7233	-0.99194	-0.326252	-0.264358	0.860701	1.15134	0.736654	0.671255	0.0353412	-1.5997	-0.59395	-1.43171	-1.51842	-1.51232	0.411215	0.370765	1.04093	1.0805	1.32984	1.06112	0.410133	0.728331	-0.0465532	0.800015	2.92177e-05	NM_134253	RefSeq	Mus musculus BCL2/adenovirus E1B 19kD interacting protein like (Bnipl), mRNA.	FALSE	GO:0006915 // GO:0006917	apoptosis // induction of apoptosis	GO:0005575	cellular_component	GO:0003674	molecular_function	---	---
10458314	1083	Tmem173	0.684014	1.5144	1.11442	0.783998	0.696274	-1.15203	-0.936623	-1.14139	-1.42876	-0.939283	1.61724	1.00439	0.435313	1.35513	1.02532	0.303394	0.401951	-0.706692	-0.124615	-0.550744	-0.345486	-0.712444	-1.498	-0.0508326	-1.34894	3.00021e-05	BC046640	GenBank	Mus musculus transmembrane protein 173, mRNA (cDNA clone MGC:49267 IMAGE:5067343), complete cds.	FALSE	GO:0006915 // GO:0006955 // GO:0045087	apoptosis // immune response // innate immune response	GO:0005739 // GO:0005741 // GO:0005783 // GO:0005886 // GO:0016020 // GO:0016021	mitochondrion // mitochondrial outer membrane // endoplasmic reticulum // plasma membrane // membrane // integral to membrane	---	---	---	---
10503647	100	Gpr63	1.08587	0.118812	0.758059	0.552968	1.32541	-0.73006	-1.08449	-2.13199	-1.34089	-1.16119	0.38051	0.486458	1.59097	1.21241	0.65602	-0.972075	-1.48752	-0.406265	-0.452322	-0.44065	-0.290555	1.08701	0.96355	0.120482	0.159485	3.05738e-05	NM_030733	RefSeq	Mus musculus G protein-coupled receptor 63 (Gpr63), mRNA.	FALSE	GO:0007165 // GO:0007186	signal transduction // G-protein coupled receptor protein signaling pathway	GO:0005886 // GO:0016020 // GO:0016021	plasma membrane // membrane // integral to membrane	GO:0004871 // GO:0004872 // GO:0004930	signal transducer activity // receptor activity // G-protein coupled receptor activity	GenMAPP	GPCRDB_Class_A_Rhodopsin-like
10486061	1401	Rasgrp1	-0.29664	-1.25833	-0.656349	-0.87722	-0.76636	0.911495	1.41518	0.833794	0.366748	0.56628	-1.80977	-1.31161	-1.30939	-1.33623	-0.215645	1.40799	0.323874	1.75009	0.560758	1.47429	-0.0819084	-0.0632039	-0.334699	0.399401	0.307465	3.08038e-05	NM_011246	RefSeq	Mus musculus RAS guanyl releasing protein 1 (Rasgrp1), mRNA.	FALSE	GO:0007242 // GO:0007264 // GO:0030154 // GO:0051056	intracellular signaling cascade // small GTPase mediated signal transduction // cell differentiation // regulation of small GTPase mediated signal transduction	GO:0005622 // GO:0005737 // GO:0005783 // GO:0005794 // GO:0005886 // GO:0016020	intracellular // cytoplasm // endoplasmic reticulum // Golgi apparatus // plasma membrane // membrane	GO:0005085 // GO:0005509 // GO:0008270 // GO:0019992 // GO:0046872	guanyl-nucleotide exchange factor activity // calcium ion binding // zinc ion binding // diacylglycerol binding // metal ion binding	---	---
10434556	1010	676915	1.08575	0.683672	0.951015	1.05307	1.12952	-1.18717	-0.87868	-0.708177	-1.38265	-0.475199	0.654234	-0.189379	2.00055	1.80506	1.16103	-0.386746	-0.763864	-1.07312	-0.410911	-0.783671	-0.00499147	-0.775906	-0.00505067	-1.37346	-0.124911	3.08038e-05	XR_034101	RefSeq	PREDICTED: Mus musculus similar to nuclear domain 10 protein 52 like 1 (LOC676915), misc RNA.	FALSE	---	---	---	---	---	---	---	---
10587038	1061	2410004A20Rik	0.41085	1.24497	0.459902	0.322595	0.339265	-0.990026	-0.943375	-1.20714	-2.02217	-0.769778	1.26511	0.259092	1.26921	1.34792	1.26303	-0.12014	-0.953955	-0.456103	0.118282	-0.848893	1.88711	0.188298	-1.02085	-0.296988	-0.746212	3.09225e-05	NM_025890	RefSeq	Mus musculus RIKEN cDNA 2410004A20 gene (2410004A20Rik), mRNA.	FALSE	GO:0008150	biological_process	GO:0005938 // GO:0043234 // GO:0045179	cell cortex // protein complex // apical cortex	GO:0005515	protein binding	---	---
10522378	218	Slain2	0.416427	0.341215	0.797431	0.570757	0.640157	-1.2929	-1.07693	-1.42515	-1.70252	-1.13233	0.989447	0.22095	0.448604	1.23348	0.519185	-0.372449	-0.888313	-0.288766	0.0116897	-1.6587	2.41098	0.728265	0.202099	-0.0481546	0.355532	3.125e-05	NM_153567	RefSeq	Mus musculus SLAIN motif family, member 2 (Slain2), transcript variant 1, mRNA.	FALSE	---	---	---	---	---	---	---	---
10490773	1501	Hnrnph2	0.00412748	-1.02789	-0.11473	-0.0656849	0.105164	0.722047	0.930865	0.712738	1.35245	1.02421	-0.333712	-0.0476574	-0.531328	0.133236	0.176803	0.878491	0.931808	0.976052	0.836103	1.20605	-2.00103	-1.34136	-1.39165	-1.18341	-1.95169	3.17285e-05	NM_019868	RefSeq	Mus musculus heterogeneous nuclear ribonucleoprotein H2 (Hnrnph2), mRNA.	FALSE	---	---	GO:0005634 // GO:0030529	nucleus // ribonucleoprotein complex	GO:0000166 // GO:0003676 // GO:0003723	nucleotide binding // nucleic acid binding // RNA binding	---	---
10601266	1001	8030474K03Rik	0.45718	1.14882	1.15946	0.874006	0.785971	-0.718544	-0.260711	-0.0443291	-0.93267	0.314922	0.885811	0.999845	1.43622	1.0733	2.03775	-0.990555	-0.603585	-1.07994	-0.689458	-1.06343	-0.640831	-1.01433	-0.986552	-0.757996	-1.39034	3.18847e-05	BC100492	GenBank	Mus musculus cDNA clone IMAGE:30915948.	FALSE	---	---	---	---	---	---	---	---
10394366	52	Atad2b	0.485706	0.43381	0.64677	0.459984	0.238479	-1.19024	-0.663871	-0.758435	-1.33748	-1.37754	0.803671	0.139899	1.7567	1.48693	2.32074	-0.80945	-0.840189	-0.501914	-1.12067	-1.23912	0.908895	0.363891	-0.0543628	0.0728671	-0.225064	3.18847e-05	NM_001099628	RefSeq	Mus musculus ATPase family, AAA domain containing 2B (Atad2b), mRNA.	FALSE	---	---	---	---	---	---	---	---
10490903	19	Car13	0.193399	0.796416	0.674882	0.188633	0.422834	-0.965865	-0.924815	-1.17734	-2.42757	-1.7344	0.854658	0.437481	0.813883	0.609023	1.62644	-0.34046	-0.244076	-0.552702	-0.792678	-1.29208	0.985802	0.951054	0.619291	0.891059	0.387132	3.22961e-05	NM_024495	RefSeq	Mus musculus carbonic anhydrase 13 (Car13), mRNA.	FALSE	GO:0006730	one-carbon compound metabolic process	---	---	GO:0004089 // GO:0008270 // GO:0016829 // GO:0046872	carbonate dehydratase activity // zinc ion binding // lyase activity // metal ion binding	---	---
10533474	257	1500011H22Rik	0.500138	0.551098	0.735147	0.340334	0.0770113	-1.94156	-1.07504	-0.358606	-0.743103	-1.01843	1.04302	1.21145	1.3289	0.555468	1.83308	-0.425197	-1.62655	-1.09771	-0.483921	-1.26801	1.2813	0.437935	-0.299643	0.57893	-0.136024	3.25435e-05	BC019498	GenBank	Mus musculus RIKEN cDNA 1500011H22 gene, mRNA (cDNA clone MGC:27542 IMAGE:4460879), complete cds.	FALSE	---	---	---	---	---	---	---	---
10456978	966	---	1.25962	1.05646	0.93175	1.47855	1.36013	-0.432901	-0.29039	-0.831201	-0.428209	-0.358545	-0.357955	0.733871	1.85648	0.8988	1.48933	-0.604581	-0.558228	-0.618592	-0.573033	-0.827987	-0.640749	-0.696678	-1.06603	-1.3217	-1.45821	3.2549e-05	GENSCAN00000017868	ENSEMBL	cdna:Genscan chromosome:NCBIM37:18:80213024:80220077:1	FALSE	---	---	---	---	---	---	---	---
10456984	965	---	1.25962	1.05646	0.93175	1.47855	1.36013	-0.432901	-0.29039	-0.831201	-0.428209	-0.358545	-0.357955	0.733871	1.85648	0.8988	1.48933	-0.604581	-0.558228	-0.618592	-0.573033	-0.827987	-0.640749	-0.696678	-1.06603	-1.3217	-1.45821	3.2549e-05	GENSCAN00000017865	ENSEMBL	cdna:Genscan chromosome:NCBIM37:18:80222832:80226623:1	FALSE	---	---	---	---	---	---	---	---
10456980	964	ENSMUSG00000073524	1.25962	1.05646	0.93175	1.47855	1.36013	-0.432901	-0.29039	-0.831201	-0.428209	-0.358545	-0.357955	0.733871	1.85648	0.8988	1.48933	-0.604581	-0.558228	-0.618592	-0.573033	-0.827987	-0.640749	-0.696678	-1.06603	-1.3217	-1.45821	3.2549e-05	ENSMUST00000097510	ENSEMBL	similar to elongation factor 1 homolog gene:ENSMUSG00000073524	FALSE	---	---	---	---	---	---	---	---
10456982	963	ENSMUSG00000073524	1.25962	1.05646	0.93175	1.47855	1.36013	-0.432901	-0.29039	-0.831201	-0.428209	-0.358545	-0.357955	0.733871	1.85648	0.8988	1.48933	-0.604581	-0.558228	-0.618592	-0.573033	-0.827987	-0.640749	-0.696678	-1.06603	-1.3217	-1.45821	3.2549e-05	ENSMUST00000097510	ENSEMBL	similar to elongation factor 1 homolog gene:ENSMUSG00000073524	FALSE	---	---	---	---	---	---	---	---
10379646	1604	Slfn3	-0.324347	-0.784675	0.0288583	-0.0452745	0.0602065	0.822171	1.00989	1.62542	1.38794	1.39386	-0.464942	0.0221052	-0.0812203	-0.139295	-0.684717	0.342057	0.728148	0.714529	0.656668	1.17308	-1.3846	-1.2161	-1.52049	-1.95309	-1.36619	3.28496e-05	NM_011409	RefSeq	Mus musculus schlafen 3 (Slfn3), mRNA.	FALSE	GO:0008285	negative regulation of cell proliferation	---	---	---	---	---	---
10490736	498	Rgs19	1.21032	0.740205	0.0146392	1.03904	0.978012	-1.2803	-0.526011	-0.216728	-1.25913	-1.23459	1.66072	1.03943	0.478146	0.69502	0.152751	-0.752342	-1.85687	-0.700993	-1.04011	-1.22554	-0.856411	1.20823	0.64756	0.628144	0.456819	3.29482e-05	NM_026446	RefSeq	Mus musculus regulator of G-protein signaling 19 (Rgs19), mRNA.	FALSE	GO:0009968	negative regulation of signal transduction	GO:0016020	membrane	GO:0004871 // GO:0005515	signal transducer activity // protein binding	---	---
10573172	22	Clgn	0.474627	1.76752	0.466849	0.286485	0.197797	-1.24469	-0.759026	-1.19907	-1.44516	-0.926642	1.66889	0.245028	0.886469	0.774483	1.22859	-0.827615	-1.05259	-0.420777	-0.858583	-1.93853	0.242252	0.668097	0.772297	0.474241	0.519066	3.30136e-05	NM_009904	RefSeq	Mus musculus calmegin (Clgn), mRNA.	FALSE	GO:0006457 // GO:0007126 // GO:0007275 // GO:0007283 // GO:0030154	protein folding // meiosis // multicellular organismal development // spermatogenesis // cell differentiation	GO:0005783 // GO:0016020 // GO:0016021	endoplasmic reticulum // membrane // integral to membrane	GO:0005509 // GO:0051082	calcium ion binding // unfolded protein binding	---	---
10480714	2133	Uap1l1	-0.504347	-0.761816	-0.0417732	-0.45967	-0.856285	0.682602	0.99262	1.01673	0.726641	0.551038	-0.932452	-0.139486	-0.28337	-1.23064	-1.12752	0.50965	2.11128	1.37472	1.48012	1.10958	-0.201759	-0.760333	-1.87828	-0.580985	-0.796272	3.3192e-05	NM_001033293	RefSeq	Mus musculus UDP-N-acteylglucosamine pyrophosphorylase 1-like 1 (Uap1l1), mRNA.	FALSE	GO:0008152	metabolic process	---	---	GO:0016740 // GO:0016779	transferase activity // nucleotidyltransferase activity	---	---
10531518	952	BC061212	1.39955	1.20825	1.22595	1.60743	1.40238	-0.595757	-0.424887	-1.04218	-0.464536	-0.525303	-0.676703	0.810475	1.62147	0.774521	1.09966	-0.736214	-0.526089	-0.606293	-0.779691	-1.16086	-0.121747	-0.260788	-0.853273	-1.39693	-0.978419	3.39906e-05	BC061212	GenBank	Mus musculus cDNA sequence BC061212, mRNA (cDNA clone MGC:74356 IMAGE:30250942), complete cds.	FALSE	---	---	---	---	---	---	---	---
10535989	955	A430089I19Rik	1.40112	1.21401	1.2232	1.60713	1.41326	-0.599531	-0.433655	-1.04459	-0.451631	-0.526727	-0.679364	0.804521	1.60521	0.773244	1.1091	-0.72861	-0.539889	-0.588058	-0.772258	-1.1792	-0.124564	-0.261863	-0.851264	-1.38704	-0.982561	3.41853e-05	NM_177913	RefSeq	Mus musculus RIKEN cDNA A430089I19 gene (A430089I19Rik), mRNA.	FALSE	---	---	---	---	---	---	---	---
10536085	954	A430089I19Rik	1.40112	1.21401	1.2232	1.60713	1.41326	-0.599531	-0.433655	-1.04459	-0.451631	-0.526727	-0.679364	0.804521	1.60521	0.773244	1.1091	-0.72861	-0.539889	-0.588058	-0.772258	-1.1792	-0.124564	-0.261863	-0.851264	-1.38704	-0.982561	3.41853e-05	NM_177913	RefSeq	Mus musculus RIKEN cDNA A430089I19 gene (A430089I19Rik), mRNA.	FALSE	---	---	---	---	---	---	---	---
10536136	953	BC061212	1.40112	1.21401	1.2232	1.60713	1.41326	-0.599531	-0.433655	-1.04459	-0.451631	-0.526727	-0.679364	0.804521	1.60521	0.773244	1.1091	-0.72861	-0.539889	-0.588058	-0.772258	-1.1792	-0.124564	-0.261863	-0.851264	-1.38704	-0.982561	3.41853e-05	BC061212	GenBank	Mus musculus cDNA sequence BC061212, mRNA (cDNA clone MGC:74356 IMAGE:30250942), complete cds.	FALSE	---	---	---	---	---	---	---	---
10468275	1891	Pcgf6	-0.29617	-1.41516	0.306237	-0.0667866	0.0426955	0.783361	1.55213	1.15392	1.74954	1.72083	-1.15588	-1.16169	-0.399185	-1.42215	-1.44323	0.0475333	0.718698	0.822613	0.471152	0.716559	-1.16741	-0.163957	0.0716646	-0.936846	-0.528474	3.45078e-05	NM_027654	RefSeq	Mus musculus polycomb group ring finger 6 (Pcgf6), mRNA.	FALSE	GO:0000122 // GO:0006350 // GO:0006355	negative regulation of transcription from RNA polymerase II promoter // transcription // regulation of transcription, DNA-dependent	GO:0005634	nucleus	GO:0005515 // GO:0008270 // GO:0016564 // GO:0019904 // GO:0046872	protein binding // zinc ion binding // transcription repressor activity // protein domain specific binding // metal ion binding	---	---
10502951	2036	Acadm	-0.96798	-1.17172	-0.680068	-0.740183	-1.04891	1.0183	0.657168	1.55341	1.34469	1.18466	-0.749438	-1.26431	-1.72297	-0.750383	-0.0260122	-0.18021	0.727989	0.26701	1.06285	0.414892	1.79196	0.0886496	0.131986	-1.23831	0.296934	3.49695e-05	NM_007382	RefSeq	Mus musculus acyl-Coenzyme A dehydrogenase, medium chain (Acadm), nuclear gene encoding mitochondrial protein, mRNA.	FALSE	GO:0001889 // GO:0006082 // GO:0006629 // GO:0006631 // GO:0007507 // GO:0008152 // GO:0009409 // GO:0009437 // GO:0009791 // GO:0042594 // GO:0055007 // GO:0055114	liver development // organic acid metabolic process // lipid metabolic process // fatty acid metabolic process // heart development // metabolic process // response to cold // carnitine metabolic process // post-embryonic development // response to starvation // cardiac muscle cell differentiation // oxidation reduction	GO:0005739	mitochondrion	GO:0003995 // GO:0009055 // GO:0016491 // GO:0016627 // GO:0050660	acyl-CoA dehydrogenase activity // electron carrier activity // oxidoreductase activity // oxidoreductase activity, acting on the CH-CH group of donors // FAD binding	GenMAPP // GenMAPP	Fatty_Acid_Degradation // Mitochondrial_fatty_acid_betaoxidation
10442932	2035	Tmem8	-1.05629	-1.69019	-0.525523	-1.03475	-0.734285	1.29949	1.30541	1.71185	1.15591	1.35103	-0.181788	-1.13241	-1.63576	-0.261873	-0.978679	-0.000137642	0.615522	0.642209	0.436519	0.434687	0.441092	0.0335698	0.464357	-1.289	0.629043	3.58451e-05	NM_021793	RefSeq	Mus musculus transmembrane protein 8 (five membrane-spanning domains) (Tmem8), mRNA.	FALSE	GO:0007155 // GO:0008150	cell adhesion // biological_process	GO:0005887 // GO:0016020 // GO:0016021	integral to plasma membrane // membrane // integral to membrane	GO:0003674 // GO:0005515	molecular_function // protein binding	---	---
10456976	968	AA684185 // ENSMUSG00000073521	1.25145	1.05377	0.930527	1.47351	1.37233	-0.411146	-0.275657	-0.842412	-0.425105	-0.367275	-0.356308	0.711762	1.8822	0.87071	1.48757	-0.610892	-0.610186	-0.625222	-0.541649	-0.797254	-0.629541	-0.677501	-1.06103	-1.32533	-1.47732	3.58451e-05	ENSMUST00000097508	ENSEMBL	similar to elongation factor 1 homolog gene:ENSMUSG00000073521	FALSE	---	---	---	---	---	---	---	---
10456986	967	ENSMUSG00000073525	1.25145	1.05377	0.930527	1.47351	1.37233	-0.411146	-0.275657	-0.842412	-0.425105	-0.367275	-0.356308	0.711762	1.8822	0.87071	1.48757	-0.610892	-0.610186	-0.625222	-0.541649	-0.797254	-0.629541	-0.677501	-1.06103	-1.32533	-1.47732	3.58451e-05	XM_001475493	RefSeq	PREDICTED: Mus musculus similar to elongation factor 1 homolog (S. cerevisiae) (LOC620963), mRNA.	FALSE	---	---	---	---	---	---	---	---
10530726	951	BC061212	1.40225	1.18674	1.25797	1.6043	1.3864	-0.594616	-0.421639	-1.04699	-0.460841	-0.518077	-0.681264	0.805676	1.61708	0.742893	1.10851	-0.732006	-0.529265	-0.612594	-0.749416	-1.18031	-0.0833079	-0.246653	-0.850494	-1.42822	-0.976138	3.58451e-05	BC061212	GenBank	Mus musculus cDNA sequence BC061212, mRNA (cDNA clone MGC:74356 IMAGE:30250942), complete cds.	FALSE	---	---	---	---	---	---	---	---
10531507	950	BC061212	1.40225	1.18674	1.25797	1.6043	1.3864	-0.594616	-0.421639	-1.04699	-0.460841	-0.518077	-0.681264	0.805676	1.61708	0.742893	1.10851	-0.732006	-0.529265	-0.612594	-0.749416	-1.18031	-0.0833079	-0.246653	-0.850494	-1.42822	-0.976138	3.58451e-05	BC061212	GenBank	Mus musculus cDNA sequence BC061212, mRNA (cDNA clone MGC:74356 IMAGE:30250942), complete cds.	FALSE	---	---	---	---	---	---	---	---
10381601	575	Mdk	0.51569	0.892503	0.476518	0.653928	0.760445	-0.821877	-0.326753	-1.60727	-1.39535	-2.01703	0.893992	-0.00080428	1.20534	1.13156	0.145624	-0.333552	-1.04598	-0.713965	-1.14767	-1.296	0.800292	0.81274	0.36929	1.53545	0.512866	3.58451e-05	DQ323886	GenBank	Mus musculus embryonic-specific truncated midkine B (Mdk) mRNA, complete cds.	FALSE	GO:0007275 // GO:0008283 // GO:0009611 // GO:0030154	multicellular organismal development // cell proliferation // response to wounding // cell differentiation	GO:0005576	extracellular region	GO:0008083 // GO:0008201	growth factor activity // heparin binding	---	---
10374236	46	Upp1	0.249627	0.832927	0.529243	0.546069	0.32888	-0.765081	-0.708167	-1.82675	-1.59717	-1.41298	1.59464	0.405248	0.86831	1.17861	1.46999	-0.194961	-0.932557	-0.289821	-0.343076	-1.88818	0.996319	0.0550776	-0.14591	0.93263	0.117089	3.58451e-05	NM_009477	RefSeq	Mus musculus uridine phosphorylase 1 (Upp1), mRNA.	FALSE	GO:0006220 // GO:0009116 // GO:0009166 // GO:0046108	pyrimidine nucleotide metabolic process // nucleoside metabolic process // nucleotide catabolic process // uridine metabolic process	GO:0005737	cytoplasm	GO:0003824 // GO:0004850 // GO:0016740 // GO:0016757	catalytic activity // uridine phosphorylase activity // transferase activity // transferase activity, transferring glycosyl groups	---	---
10387536	2284	Cd68	-0.699265	-1.23673	-1.15791	-0.925736	-0.362002	0.767292	1.0072	1.41714	0.831859	1.16249	0.463842	-0.557962	-1.60244	-0.0614189	-1.15191	0.613132	1.47624	1.04925	0.835656	1.41625	0.220367	-0.912638	-0.619126	-1.00138	-0.972198	3.73329e-05	NM_009853	RefSeq	Mus musculus CD68 antigen (Cd68), mRNA.	FALSE	---	---	GO:0005764 // GO:0005768 // GO:0005886 // GO:0016020 // GO:0016021	lysosome // endosome // plasma membrane // membrane // integral to membrane	---	---	---	---
10381608	600	Gm1564	0.370765	1.20835	0.854772	0.399466	0.383311	-0.742327	-0.111116	-0.580272	-1.95964	-1.59538	1.13881	1.05918	0.732553	0.162901	0.92196	-0.87136	-1.67936	-0.765859	-1.20935	-1.00391	0.724504	0.685406	0.216248	1.60204	0.0583237	3.73329e-05	NM_001127576	RefSeq	Mus musculus gene model 1564, (NCBI) (Gm1564), mRNA.	FALSE	---	---	---	---	---	---	---	---
10530722	956	BC061212	1.41219	1.11457	1.28174	1.65141	1.43544	-0.537812	-0.427247	-1.04751	-0.464954	-0.539644	-0.696651	0.776385	1.5351	0.759771	1.07251	-0.772591	-0.431232	-0.729705	-0.756133	-1.30646	-0.0256222	-0.202559	-0.792024	-1.43357	-0.8754	3.73961e-05	BC061212	GenBank	Mus musculus cDNA sequence BC061212, mRNA (cDNA clone MGC:74356 IMAGE:30250942), complete cds.	FALSE	---	---	---	---	---	---	---	---
10433709	11	2900011O08Rik	0.910491	0.929627	0.662777	0.665153	0.604084	-0.673329	-0.757242	-1.87321	-1.81968	-1.92243	1.09734	1.04642	0.860944	0.838454	1.00825	0.055752	-0.935781	-0.210201	-0.147053	-1.81977	0.183037	0.426147	0.404224	0.317526	0.148476	3.80239e-05	BC022741	GenBank	Mus musculus RIKEN cDNA 2900011O08 gene, mRNA (cDNA clone MGC:31632 IMAGE:4511454), complete cds.	FALSE	---	---	---	---	GO:0005515	protein binding	---	---
10560624	1528	Apoe	-0.26316	-0.741622	0.0810952	0.156565	-0.0707723	1.21733	1.41654	1.36125	0.782005	0.193227	-0.534256	-0.540899	-0.0796231	-0.568649	-0.712367	0.675402	0.890031	1.31762	0.957083	1.46344	-1.46205	-1.37965	-1.38969	-1.59834	-1.17051	3.8253e-05	NM_009696	RefSeq	Mus musculus apolipoprotein E (Apoe), mRNA.	FALSE	GO:0002021 // GO:0006629 // GO:0006707 // GO:0006810 // GO:0006869 // GO:0006874 // GO:0006979 // GO:0008104 // GO:0008203 // GO:0010468 // GO:0031103 // GO:0033344 // GO:0033344 // GO:0042157 // GO:0042157 // GO:0042158 // GO:0042159 // GO:0042311 // GO:0042632 // GO:0042632 // GO:0048844 // GO:0051651 // GO:0055088	response to dietary excess // lipid metabolic process // cholesterol catabolic process // transport // lipid transport // cellular calcium ion homeostasis // response to oxidative stress // protein localization // cholesterol metabolic process // regulation of gene expression // axon regeneration // cholesterol efflux // cholesterol efflux // lipoprotein metabolic process // lipoprotein metabolic…	GO:0005576 // GO:0005615 // GO:0042627	extracellular region // extracellular space // chylomicron	GO:0005319 // GO:0008034 // GO:0008201 // GO:0008289 // GO:0017127	lipid transporter activity // lipoprotein binding // heparin binding // lipid binding // cholesterol transporter activity	---	---
10536126	949	BC061212	1.42089	1.182	1.23126	1.62009	1.39835	-0.575893	-0.452622	-1.0168	-0.448939	-0.529548	-0.681775	0.788339	1.62789	0.749367	1.10034	-0.717104	-0.485644	-0.603496	-0.782951	-1.15853	-0.134213	-0.247412	-0.857657	-1.43657	-0.989373	3.8253e-05	BC061212	GenBank	Mus musculus cDNA sequence BC061212, mRNA (cDNA clone MGC:74356 IMAGE:30250942), complete cds.	FALSE	---	---	---	---	---	---	---	---
10526098	1265	Scand3	-0.303287	-0.93303	-0.0565432	-0.45589	-0.0142904	0.993813	0.688596	1.24498	1.66352	1.14319	-0.529846	-0.781246	-2.13713	-1.96288	-1.37848	0.151201	0.351332	0.232866	0.909204	0.755878	-0.1714	-0.227415	1.53532	-0.701124	-0.0173392	3.85485e-05	NM_183088	RefSeq	Mus musculus RIKEN cDNA 2410018M08 gene (2410018M08Rik), mRNA.	FALSE	---	---	---	---	---	---	---	---
10593903	1968	Commd4	-0.394828	-1.26727	-0.340077	-0.786328	-0.545655	0.298122	0.359881	1.31083	1.51027	1.35841	-1.00286	-0.403749	-1.29479	-1.04684	-1.4191	1.4781	1.03073	1.94821	0.198495	0.749722	-0.72599	-0.211791	0.245432	-0.949995	-0.0989416	4.19195e-05	NM_025417	RefSeq	Mus musculus COMM domain containing 4 (Commd4), mRNA.	FALSE	GO:0008150	biological_process	GO:0005575	cellular_component	GO:0003674	molecular_function	---	---
10464836	656	Actn3	0.244551	0.379766	0.123126	0.0848045	0.0219502	-0.795822	-0.709765	-1.07404	-1.38748	-1.19556	1.26863	-0.371435	0.0779552	0.35783	0.295536	-0.811992	-1.31784	-0.786955	-0.830278	-0.991192	1.83796	1.15022	1.1658	1.83733	1.4269	4.23813e-05	NM_013456	RefSeq	Mus musculus actinin alpha 3 (Actn3), mRNA.	FALSE	GO:0006936	muscle contraction	GO:0005865	striated muscle thin filament	GO:0003779 // GO:0005509 // GO:0005515 // GO:0030674 // GO:0042803 // GO:0051015 // GO:0051015	actin binding // calcium ion binding // protein binding // protein binding, bridging // protein homodimerization activity // actin filament binding // actin filament binding	---	---
10407766	1665	Lgals8	-0.509322	-0.384042	-0.396524	-0.53116	-0.450477	0.679429	0.698385	1.57584	1.53031	1.52629	-0.604265	-0.459812	0.0255965	-0.110269	0.0241914	0.824399	1.52687	0.562595	0.350523	0.944934	-0.837513	-1.78153	-1.71064	-1.21185	-1.28196	4.28426e-05	NM_018886	RefSeq	Mus musculus lectin, galactose binding, soluble 8 (Lgals8), mRNA.	FALSE	---	---	GO:0005737	cytoplasm	GO:0005529	sugar binding	---	---
10521798	1223	Pacrgl	-0.487507	0.31544	-0.395107	-0.9883	-0.616683	0.794389	0.860447	0.850059	1.69263	1.36233	-1.84284	-0.630069	-2.43021	-1.2735	-1.05768	0.462056	0.37588	0.388329	0.110176	0.225141	-0.157874	0.523285	1.23266	0.712743	-0.0257902	4.3694e-05	NM_025755	RefSeq	Mus musculus PARK2 co-regulated-like (Pacrgl), mRNA.	FALSE	---	---	---	---	---	---	---	---
10532630	50	Adrbk2	0.302775	0.975973	0.836557	-0.148566	0.421363	-0.882229	-0.414746	-1.03999	-1.19803	-1.53555	1.84345	0.128591	1.51091	1.06063	1.95235	-0.6244	-1.10134	-1.13567	-0.639384	-0.932659	0.778813	-0.134094	-0.123242	0.674187	-0.575696	4.39716e-05	NM_177078	RefSeq	Mus musculus adrenergic receptor kinase, beta 2 (Adrbk2), transcript variant 1, mRNA.	FALSE	GO:0006468 // GO:0007165	protein amino acid phosphorylation // signal transduction	---	---	GO:0000166 // GO:0004672 // GO:0004674 // GO:0004703 // GO:0004871 // GO:0005524 // GO:0016301 // GO:0016740 // GO:0047696	nucleotide binding // protein kinase activity // protein serine/threonine kinase activity // G-protein coupled receptor kinase activity // signal transducer activity // ATP binding // kinase activity // transferase activity // beta-adrenergic receptor kinase activity	---	---
10456622	221	Mbd1	0.882269	0.920648	0.10205	0.672475	0.887435	-1.42685	-1.12728	-2.51285	-1.04107	-0.781861	0.56381	1.37677	0.465242	0.675536	1.00418	-0.642526	-0.08939	-0.984996	-0.38568	-1.44196	1.18256	0.71389	0.50433	0.327747	0.155509	4.40488e-05	NM_013594	RefSeq	Mus musculus methyl-CpG binding domain protein 1 (Mbd1), mRNA.	FALSE	GO:0006306 // GO:0006350 // GO:0006355	DNA methylation // transcription // regulation of transcription, DNA-dependent	GO:0000785 // GO:0000792 // GO:0005634 // GO:0005730 // GO:0005737	chromatin // heterochromatin // nucleus // nucleolus // cytoplasm	GO:0003677 // GO:0008270 // GO:0046872	DNA binding // zinc ion binding // metal ion binding	---	---
10510687	2313	Acot7	-0.606023	-0.758815	-0.624903	-0.110008	-0.100511	0.711264	0.666296	1.86535	1.67305	1.99895	-1.03714	-0.100511	-0.441609	-1.21114	-1.22662	0.535042	0.947553	0.458272	0.361895	1.21343	-1.05438	-0.338028	-0.520342	-1.26467	-1.03639	4.48834e-05	NM_133348	RefSeq	Mus musculus acyl-CoA thioesterase 7 (Acot7), mRNA.	FALSE	GO:0009062	fatty acid catabolic process	GO:0005737 // GO:0005829	cytoplasm // cytosol	GO:0004091 // GO:0016290 // GO:0016787	carboxylesterase activity // palmitoyl-CoA hydrolase activity // hydrolase activity	---	---
10536122	944	---	1.23922	1.22845	1.27168	1.57001	1.43591	-0.748113	-0.402077	-0.988265	-0.339344	-0.535508	-0.711249	0.671151	1.60229	0.809091	1.31863	-0.796092	-0.473442	-0.774898	-0.733189	-0.920801	-0.177259	-0.146435	-1.04058	-1.30601	-1.05317	4.5178e-05	GENSCAN00000012745	ENSEMBL	cdna:Genscan supercontig:NCBIM37:NT_166436:99107:125296:-1	FALSE	---	---	---	---	---	---	---	---
10535043	2261	Pdgfa	-0.273694	-1.39997	-0.765861	-0.779679	-0.396707	0.331596	0.130789	1.32176	1.19535	1.50713	-0.275547	-0.638167	-0.965255	-0.14271	-1.16953	0.690802	0.995368	0.684031	1.13041	1.56202	-0.890378	-0.243665	0.278122	-2.33484	0.448615	4.61239e-05	NM_008808	RefSeq	Mus musculus platelet derived growth factor, alpha (Pdgfa), mRNA.	FALSE	GO:0001525 // GO:0008283 // GO:0008284 // GO:0009887 // GO:0009887 // GO:0030031 // GO:0030036 // GO:0048286 // GO:0050730	angiogenesis // cell proliferation // positive regulation of cell proliferation // organ morphogenesis // organ morphogenesis // cell projection assembly // actin cytoskeleton organization // alveolus development // regulation of peptidyl-tyrosine phosphorylation	GO:0005576 // GO:0005902 // GO:0016020	extracellular region // microvillus // membrane	GO:0005518 // GO:0008083	collagen binding // growth factor activity	---	---
10462918	1621	Tmem20	-0.0269787	-1.09803	-0.136088	-0.111687	-0.255256	0.616469	0.664416	0.930365	1.67363	1.68165	-0.692778	-0.41963	-0.222037	-0.306269	-0.0738325	0.768889	0.635141	0.960413	1.18043	0.757045	-0.505367	-0.871264	-1.51708	-2.44098	-1.19117	4.61239e-05	NM_175507	RefSeq	Mus musculus transmembrane protein 20 (Tmem20), mRNA.	FALSE	---	---	GO:0016020 // GO:0016021	membrane // integral to membrane	---	---	---	---
10602739	1544	Acot9	-0.108858	-0.670281	0.105295	-0.265424	-0.499088	0.862514	0.955644	1.33448	1.34139	1.24396	-0.693363	-0.287342	0.117318	-0.213812	0.26214	0.882305	0.705812	0.829818	0.30807	1.36688	-1.22353	-1.68956	-1.21694	-1.84318	-1.60424	4.61239e-05	NM_019736	RefSeq	Mus musculus acyl-CoA thioesterase 9 (Acot9), mRNA.	FALSE	---	---	GO:0005739	mitochondrion	GO:0004091 // GO:0016290 // GO:0016291 // GO:0016787	carboxylesterase activity // palmitoyl-CoA hydrolase activity // acyl-CoA thioesterase activity // hydrolase activity	---	---
10441815	1712	Sod2	-0.569965	-0.783807	-0.735617	-0.883102	-0.639101	0.84154	0.421053	1.16227	1.75472	1.38471	-1.20464	-1.44718	-0.49201	-0.528384	-0.125346	0.34511	1.94929	0.751826	0.385294	1.54132	-0.532375	-0.556738	-0.290032	-1.50734	-0.2415	4.66842e-05	NM_013671	RefSeq	Mus musculus superoxide dismutase 2, mitochondrial (Sod2), nuclear gene encoding mitochondrial protein, mRNA.	FALSE	GO:0000302 // GO:0000303 // GO:0001306 // GO:0001836 // GO:0001889 // GO:0003032 // GO:0003069 // GO:0006302 // GO:0006749 // GO:0006801 // GO:0006915 // GO:0006979 // GO:0006979 // GO:0007005 // GO:0007507 // GO:0007605 // GO:0007626 // GO:0008217 // GO:0009791 // GO:0010260 // GO:0010332 // GO:0014823 // GO:0019430 // GO:0022904 // GO:0030097 // GO:0042311 // GO:0042542 // GO:0042554 // GO:0043…	response to reactive oxygen species // response to superoxide // age-dependent response to oxidative stress // release of cytochrome c from mitochondria // liver development // detection of oxygen // vasodilation by acetylcholine involved in regulation of systemic arterial blood pressure // double-strand break repair // glutathione metabolic process // superoxide metabolic process // apoptosis //…	GO:0005739 // GO:0005743	mitochondrion // mitochondrial inner membrane	GO:0004784 // GO:0004784 // GO:0016491 // GO:0030145 // GO:0046872	superoxide dismutase activity // superoxide dismutase activity // oxidoreductase activity // manganese ion binding // metal ion binding	---	---
10600205	987	Dusp9	1.09808	1.00379	1.28717	1.31855	1.13018	-0.539173	-0.448745	-1.03045	-1.63856	-0.954183	0.867294	0.895723	1.17568	1.20012	0.787806	-0.143988	-1.26886	-0.0718778	0.376824	-1.64236	-0.708089	-0.397644	-0.951035	-0.569134	-0.777108	4.66842e-05	NM_029352	RefSeq	Mus musculus dual specificity phosphatase 9 (Dusp9), mRNA.	FALSE	GO:0000188	inactivation of MAPK activity	GO:0005737	cytoplasm	GO:0016301 // GO:0017017	kinase activity // MAP kinase tyrosine/serine/threonine phosphatase activity	---	---
10390080	883	Tmem92	1.23802	1.01093	1.05222	1.49137	1.18886	-0.363342	-0.0557003	-0.549729	-0.127048	0.143412	-0.219595	0.526339	1.56956	1.03078	1.34456	-0.542181	-0.544615	-0.333362	-0.438742	-0.78448	-1.01378	-1.14229	-1.35244	-1.59327	-1.53548	4.66842e-05	NM_001034896	RefSeq	Mus musculus transmembrane protein 92 (Tmem92), mRNA.	FALSE	---	---	---	---	---	---	---	---
10535994	948	A430089I19Rik	1.39253	1.20009	1.24452	1.64031	1.42445	-0.626726	-0.443064	-0.96797	-0.504673	-0.55283	-0.725345	0.758339	1.66257	0.71708	1.07487	-0.694317	-0.465331	-0.637063	-0.803929	-1.04374	-0.108649	-0.250556	-0.826317	-1.45243	-1.01182	4.70772e-05	NM_177913	RefSeq	Mus musculus RIKEN cDNA A430089I19 gene (A430089I19Rik), mRNA.	FALSE	---	---	---	---	---	---	---	---
10600777	1615	AU015836	-0.223292	-0.853789	-0.320257	-0.343552	-0.126005	0.430012	0.733741	1.11053	1.17727	1.48904	-0.520655	-1.34453	0.00721315	0.0551153	-0.247391	0.52545	1.20663	1.09871	0.98727	1.14275	-0.659378	-1.12643	-0.75828	-2.68601	-0.754161	4.71292e-05	BC141215	GenBank	Mus musculus cDNA clone MGC:176176 IMAGE:9055827, complete cds.	FALSE	---	---	---	---	---	---	---	---
10345504	795	Cox5b	0.46968	1.92793	1.07259	0.770926	0.338398	-1.15942	-0.441381	-0.759937	-1.15609	-0.679966	0.655298	0.883037	0.47936	0.515697	1.8768	-0.478792	-1.03356	-0.898721	-1.41718	-2.11386	0.533279	0.387061	0.176337	0.10302	-0.050503	4.71292e-05	NM_009942	RefSeq	Mus musculus cytochrome c oxidase, subunit Vb (Cox5b), mRNA.	FALSE	---	---	GO:0005739 // GO:0005740 // GO:0005743 // GO:0016020	mitochondrion // mitochondrial envelope // mitochondrial inner membrane // membrane	GO:0004129 // GO:0008270 // GO:0046872	cytochrome-c oxidase activity // zinc ion binding // metal ion binding	---	---
10447431	2317	Foxn2	-0.389751	-1.46675	-0.77477	-0.0144963	-0.715724	0.849667	0.458666	0.97252	2.30138	1.66569	-0.533804	-0.464454	-1.04451	-1.17897	-1.00156	0.232443	1.05963	0.950225	1.0967	0.66153	-0.435667	-0.482907	0.183868	-1.51805	-0.410911	4.7163e-05	NM_180974	RefSeq	Mus musculus forkhead box N2 (Foxn2), mRNA.	FALSE	---	---	GO:0005634	nucleus	GO:0003677	DNA binding	---	---
10404127	1142	Hist1h2aa	0.905104	0.821876	1.1929	1.32544	0.9921	-0.912191	-0.713486	-1.5321	-1.40922	-1.16345	0.500492	0.864297	1.53132	0.434874	1.5449	0.411976	-1.64696	-0.390685	-0.278579	-0.724746	0.0527887	-0.486373	-1.02023	0.314756	-0.614808	4.73134e-05	NM_175658	RefSeq	Mus musculus histone cluster 1, H2aa (Hist1h2aa), mRNA.	FALSE	---	---	GO:0000786 // GO:0005634 // GO:0005694	nucleosome // nucleus // chromosome	GO:0003677	DNA binding	---	---
10412562	2131	Flnb	-0.110126	-1.57811	-0.330142	-0.745861	-1.01314	1.10565	1.03212	1.08997	0.641012	0.94362	-0.655439	0.520474	-0.108629	-0.585257	-0.629677	0.625965	1.80294	1.2243	0.858399	1.20496	-0.855561	-1.30564	-0.557578	-1.59229	-0.981963	4.8364e-05	NM_134080	RefSeq	Mus musculus filamin, beta (Flnb), mRNA.	FALSE	GO:0007519	skeletal muscle development	GO:0001725 // GO:0005737 // GO:0005856 // GO:0005925	stress fiber // cytoplasm // cytoskeleton // focal adhesion	GO:0003779 // GO:0005515	actin binding // protein binding	---	---
10531512	947	BC061212	1.39406	1.19196	1.25583	1.66686	1.40606	-0.653434	-0.47996	-1.01146	-0.385122	-0.542056	-0.678673	0.786262	1.62423	0.69461	1.09123	-0.622046	-0.501486	-0.578655	-0.689047	-1.17903	-0.224279	-0.253387	-0.881169	-1.44562	-0.985677	4.8364e-05	BC061212	GenBank	Mus musculus cDNA sequence BC061212, mRNA (cDNA clone MGC:74356 IMAGE:30250942), complete cds.	FALSE	---	---	---	---	---	---	---	---
10531523	946	BC061212	1.39406	1.19196	1.25583	1.66686	1.40606	-0.653434	-0.47996	-1.01146	-0.385122	-0.542056	-0.678673	0.786262	1.62423	0.69461	1.09123	-0.622046	-0.501486	-0.578655	-0.689047	-1.17903	-0.224279	-0.253387	-0.881169	-1.44562	-0.985677	4.8364e-05	BC061212	GenBank	Mus musculus cDNA sequence BC061212, mRNA (cDNA clone MGC:74356 IMAGE:30250942), complete cds.	FALSE	---	---	---	---	---	---	---	---
10514158	511	Psip1	0.470797	1.42701	0.625346	0.584148	0.391589	-1.48472	-0.469132	-0.872616	-0.190856	-0.878824	0.894716	-0.233471	0.215168	0.0584898	0.488647	-1.438	-1.63591	-0.592546	-1.61278	-1.10295	0.978036	1.23516	0.561493	1.87226	0.708957	4.8364e-05	NM_133948	RefSeq	Mus musculus PC4 and SFRS1 interacting protein 1 (Psip1), mRNA.	FALSE	GO:0006350 // GO:0006355	transcription // regulation of transcription, DNA-dependent	GO:0005634	nucleus	GO:0003677 // GO:0003700	DNA binding // transcription factor activity	---	---
10360040	2259	Fcgr3	-0.693396	-1.58124	-0.271142	-1.09656	-1.51788	0.150376	1.20122	0.544487	1.52894	1.99336	-0.569101	-0.857019	-0.868289	-0.354452	-0.272324	0.494289	1.32679	1.02338	0.810135	1.06529	-0.0653603	-0.829831	-1.25782	-0.291765	0.387908	4.90408e-05	NM_010188	RefSeq	Mus musculus Fc receptor, IgG, low affinity III (Fcgr3), mRNA.	FALSE	GO:0001788 // GO:0001798 // GO:0001805 // GO:0001812 // GO:0001812 // GO:0001820 // GO:0006910 // GO:0006911 // GO:0007166 // GO:0030593 // GO:0042535 // GO:0042590 // GO:0045576 // GO:0045576 // GO:0050766 // GO:0050776	antibody-dependent cellular cytotoxicity // positive regulation of type IIa hypersensitivity // positive regulation of type III hypersensitivity // positive regulation of type I hypersensitivity // positive regulation of type I hypersensitivity // serotonin secretion // phagocytosis, recognition // phagocytosis, engulfment // cell surface receptor linked signal transduction // neutrophil chemotax…	GO:0005886 // GO:0016020 // GO:0016021	plasma membrane // membrane // integral to membrane	GO:0004872 // GO:0019770 // GO:0019864	receptor activity // IgG receptor activity // IgG binding	---	---
10427622	1640	---	-0.452673	-0.819091	-0.522344	-0.212965	-0.381596	0.924892	1.02125	0.794996	1.36016	1.13535	-0.334358	-0.863188	-0.430469	0.504988	0.398403	0.651376	1.426	0.859562	0.719317	1.10416	-0.636995	-1.00859	-1.88831	-1.64149	-1.70839	4.92061e-05	GENSCAN00000049010	ENSEMBL	cdna:Genscan chromosome:NCBIM37:15:9154138:9232341:-1	FALSE	---	---	---	---	---	---	---	---
10384398	1366	Grb10	-0.860342	-0.913761	-1.07546	-1.01723	-1.05354	1.08699	0.809971	0.99943	0.563219	-0.109292	-1.4254	-0.0524113	-1.06726	-1.14193	-1.90934	0.170069	0.924997	0.137314	0.0869654	0.943772	0.695145	1.04292	0.549582	1.91585	0.699742	5.10488e-05	NM_010345	RefSeq	Mus musculus growth factor receptor bound protein 10 (Grb10), mRNA.	FALSE	GO:0007165 // GO:0048009	signal transduction // insulin-like growth factor receptor signaling pathway	GO:0005829	cytosol	GO:0004872 // GO:0005070 // GO:0005515	receptor activity // SH3/SH2 adaptor activity // protein binding	---	---
10536090	945	---	1.29399	1.24898	1.2857	1.58092	1.361	-0.784958	-0.396638	-0.808022	-0.387942	-0.60116	-0.759935	0.604344	1.62711	0.816199	1.345	-0.824448	-0.498353	-0.72288	-0.714478	-0.985677	-0.216621	-0.106455	-1.02901	-1.18491	-1.14173	5.14046e-05	BC080696	GenBank	Mus musculus cDNA sequence BC061212, mRNA (cDNA clone IMAGE:30459488).	TRUE	---	---	---	---	---	---	---	---
10566387	943	Dub2a	1.36979	0.918867	1.10942	1.51596	1.40637	-0.631263	-0.471976	-0.89932	-0.532275	-0.241202	-0.542602	0.920322	1.65134	0.649461	1.48214	-0.719618	-0.453868	-0.56938	-0.570908	-1.0436	-0.046324	-0.515503	-1.21972	-1.2444	-1.32171	5.14046e-05	NM_001001559	RefSeq	Mus musculus deubiquitinating enzyme 2a (Dub2a), mRNA.	FALSE	GO:0016579	protein deubiquitination	GO:0005575	cellular_component	GO:0004221 // GO:0004843	ubiquitin thiolesterase activity // ubiquitin-specific protease activity	---	---
10390328	1719	Tbx21	-0.74348	-0.541207	-0.777608	-0.583455	-0.446265	0.843249	0.753985	1.24308	2.26299	1.97	-0.782642	-0.607956	-0.196418	-1.09557	-0.576896	0.525191	0.684918	0.212208	0.527802	1.60523	-1.24774	-0.802552	-1.02376	-0.526081	-0.677023	5.15608e-05	NM_019507	RefSeq	Mus musculus T-box 21 (Tbx21), mRNA.	FALSE	GO:0006350 // GO:0006355 // GO:0048304 // GO:0050776	transcription // regulation of transcription, DNA-dependent // positive regulation of isotype switching to IgG isotypes // regulation of immune response	GO:0005634 // GO:0043025	nucleus // cell soma	GO:0003677 // GO:0003700	DNA binding // transcription factor activity	---	---
10413338	1405	Dnahc12 // Asb14	-0.135099	-0.633957	-0.279491	-0.982748	-0.306724	0.645655	0.813	1.70352	1.56607	-0.150426	-1.20385	-0.714477	-0.976333	-0.871463	-1.15832	0.751823	1.3114	1.60595	0.780227	1.62436	-0.466812	-1.28164	-0.794229	-0.346361	-0.500072	5.15608e-05	ENSMUST00000100792	ENSEMBL	Putative uncharacterized protein (Fragment) gene:ENSMUSG00000072668	FALSE	GO:0006511	ubiquitin-dependent protein catabolic process	---	---	---	---	---	---
10451551	998	Guca1a	0.684147	0.83802	0.934384	1.16493	0.88435	-0.669648	0.147872	-0.533701	-0.450279	-0.0417302	0.497904	0.639053	2.01719	1.27157	1.67517	-0.503688	-0.617342	-1.04206	-1.34683	-0.627391	-0.138567	-1.19357	-1.27007	-1.03	-1.28971	5.15608e-05	NM_008189	RefSeq	Mus musculus guanylate cyclase activator 1a (retina) (Guca1a), mRNA.	FALSE	GO:0007601 // GO:0007602 // GO:0031282 // GO:0050896	visual perception // phototransduction // regulation of guanylate cyclase activity // response to stimulus	GO:0016020	membrane	GO:0005509 // GO:0008048 // GO:0030249	calcium ion binding // calcium sensitive guanylate cyclase activator activity // guanylate cyclase regulator activity	---	---
10599736	1288	Fhl1	-0.46063	-1.66581	0.00526379	-0.524134	-0.559572	0.140594	0.280801	0.895273	0.385195	0.546505	-1.24828	-0.909048	-0.575244	-1.04446	-0.867565	1.19487	1.27111	1.61055	1.28456	1.3931	-1.17863	-0.391582	1.17552	-1.39869	0.640298	5.37954e-05	NM_001077361	RefSeq	Mus musculus four and a half LIM domains 1 (Fhl1), transcript variant 1, mRNA.	FALSE	GO:0007275 // GO:0030154	multicellular organismal development // cell differentiation	GO:0005634 // GO:0005737	nucleus // cytoplasm	GO:0008270 // GO:0046872	zinc ion binding // metal ion binding	---	---
10433292	661	Hmox2	0.0704449	-0.0209123	0.511111	0.138918	0.203282	-1.22249	-0.665693	-0.656571	-1.28839	-1.19491	1.04688	-0.157787	0.142621	0.533987	0.258227	-1.20962	-1.0346	-0.235726	-0.981202	-1.43956	1.47914	1.87879	1.28282	0.803271	1.75798	5.41993e-05	NM_001136066	RefSeq	Mus musculus heme oxygenase (decycling) 2 (Hmox2), mRNA.	FALSE	GO:0006788 // GO:0055114	heme oxidation // oxidation reduction	GO:0005783 // GO:0005792	endoplasmic reticulum // microsome	GO:0004392 // GO:0005506 // GO:0016491 // GO:0046872	heme oxygenase (decyclizing) activity // iron ion binding // oxidoreductase activity // metal ion binding	---	---
10592023	2212	Aplp2	-1.24971	-0.338351	-0.8746	-1.17481	-1.21441	0.883496	1.24477	1.95068	1.0585	1.08508	-0.320681	-1.2734	-0.563516	-0.164153	-0.0576425	0.126059	0.878427	0.888952	0.816267	1.83234	-0.489036	-0.795861	-0.909306	-0.645704	-0.693398	5.5144e-05	NM_001102455	RefSeq	Mus musculus amyloid beta (A4) precursor-like protein 2 (Aplp2), transcript variant 1, mRNA.	FALSE	GO:0001967 // GO:0006878 // GO:0007176 // GO:0007617 // GO:0007626 // GO:0009790 // GO:0030198 // GO:0030900 // GO:0030901 // GO:0050885	suckling behavior // cellular copper ion homeostasis // regulation of epidermal growth factor receptor activity // mating behavior // locomotory behavior // embryonic development // extracellular matrix organization // forebrain development // midbrain development // neuromuscular process controlling balance	GO:0005634 // GO:0005886 // GO:0016020 // GO:0016021	nucleus // plasma membrane // membrane // integral to membrane	GO:0003677 // GO:0005488 // GO:0005515	DNA binding // binding // protein binding	---	---
10514902	425	Lrrc42	0.0974707	0.758013	0.855214	0.210793	0.546835	-0.868884	-1.69555	-1.64943	-1.68202	-1.06943	0.740888	0.649146	0.935012	0.31768	0.402729	-0.044937	-0.166678	-0.904803	-0.719804	-1.79829	1.07246	1.1968	0.992039	1.11007	0.714676	5.5144e-05	NM_029985	RefSeq	Mus musculus leucine rich repeat containing 42 (Lrrc42), mRNA.	FALSE	---	---	---	---	GO:0005515	protein binding	---	---
10408266	1143	Hist1h2ba	0.770909	1.03832	0.98562	1.18879	1.04205	-0.931415	-0.329824	-0.896148	-0.635983	-0.515894	0.395685	0.458719	1.95121	0.866572	1.68887	0.148469	-1.86408	-0.766785	-1.2345	-0.782955	-0.0712472	-0.585237	-0.834419	0.0785033	-1.16523	5.5744e-05	NM_175663	RefSeq	Mus musculus histone cluster 1, H2ba (Hist1h2ba), mRNA.	FALSE	GO:0006334	nucleosome assembly	GO:0000786 // GO:0005634 // GO:0005694	nucleosome // nucleus // chromosome	GO:0003677	DNA binding	---	---
10557233	436	Tnrc6a	0.190952	0.804889	1.0025	1.28863	0.754211	-1.7778	-1.47523	-0.949486	-1.73504	-1.61256	0.890072	1.36107	0.300155	0.553852	0.0431014	-0.508126	-1.11928	-0.190868	-0.352366	-0.545167	0.990797	1.0763	0.631721	0.740855	-0.36318	5.5744e-05	NM_144925	RefSeq	Mus musculus trinucleotide repeat containing 6a (Tnrc6a), mRNA.	FALSE	GO:0009267 // GO:0032507	cellular response to starvation // maintenance of protein location in cell	GO:0000932 // GO:0048471	cytoplasmic mRNA processing body // perinuclear region of cytoplasm	GO:0032947	protein complex scaffold	---	---
10601848	1756	6530401D17Rik	0.0476142	-0.563737	-0.0680093	-0.219069	-0.316296	0.642322	0.79285	0.647624	1.41487	1.7592	-1.14048	-0.0517525	-0.950182	-0.420424	-0.810242	0.656775	1.56853	1.51124	0.818734	0.601191	-1.9089	-1.11746	-0.841817	-1.11436	-0.938222	5.60644e-05	NR_003641	RefSeq	Mus musculus RIKEN cDNA 6530401D17 gene (6530401D17Rik), non-coding RNA.	FALSE	---	---	---	---	---	---	---	---
10524909	1771	Nos1	-0.151436	-0.527555	-0.820259	-0.790739	-0.547509	0.9965	0.166273	0.335078	1.48266	1.90072	0.00950755	-0.201784	-0.950408	-0.394107	-0.455727	1.00831	1.45529	1.12752	0.717434	1.20199	-1.50133	-0.706772	-0.348885	-1.28444	-1.72032	5.62241e-05	NM_008712	RefSeq	Mus musculus nitric oxide synthase 1, neuronal (Nos1), mRNA.	FALSE	GO:0002028 // GO:0006809 // GO:0006941 // GO:0018119 // GO:0042738 // GO:0043267 // GO:0051346 // GO:0051926 // GO:0055114	regulation of sodium ion transport // nitric oxide biosynthetic process // striated muscle contraction // peptidyl-cysteine S-nitrosylation // exogenous drug catabolic process // negative regulation of potassium ion transport // negative regulation of hydrolase activity // negative regulation of calcium ion transport // oxidation reduction	GO:0005739 // GO:0005856 // GO:0005886 // GO:0016020 // GO:0042383 // GO:0042995 // GO:0045202	mitochondrion // cytoskeleton // plasma membrane // membrane // sarcolemma // cell projection // synapse	GO:0004517 // GO:0005506 // GO:0005515 // GO:0005516 // GO:0009055 // GO:0010181 // GO:0016491 // GO:0020037 // GO:0046872 // GO:0050660 // GO:0050661	nitric-oxide synthase activity // iron ion binding // protein binding // calmodulin binding // electron carrier activity // FMN binding // oxidoreductase activity // heme binding // metal ion binding // FAD binding // NADP binding	---	---
10439881	2126	5330426P16Rik	-0.734583	-0.361983	-1.18141	-0.209031	-1.05314	0.90499	0.276473	1.27714	-0.0925185	0.547332	-0.101181	-0.423299	-0.101181	-1.03513	-0.101181	1.04998	1.79945	1.15736	1.13105	1.6107	-0.155245	-0.620316	-1.42763	-2.15967	0.00303739	5.62349e-05	ENSMUST00000089395	ENSEMBL	hypothetical protein LOC68190 gene:ENSMUSG00000022639	FALSE	---	---	---	---	---	---	---	---
10417920	2314	Usp54	-0.146299	-0.9613	-0.393331	-0.322893	-0.866048	0.919685	0.750629	1.60534	1.67686	1.67212	-1.19009	-0.557629	-0.331755	-1.33585	-0.799347	0.283204	0.919554	0.560114	0.0628516	1.90521	-0.505566	-0.436504	-0.257846	-1.49356	-0.757544	5.62367e-05	NM_030180	RefSeq	Mus musculus ubiquitin specific peptidase 54 (Usp54), mRNA.	FALSE	GO:0006511	ubiquitin-dependent protein catabolic process	---	---	GO:0004221	ubiquitin thiolesterase activity	---	---
10396270	461	Dact1	0.665766	0.0787027	1.06725	0.944818	0.914012	-0.868586	-1.05349	-1.48108	-1.44602	-1.43236	0.192223	0.459115	0.228213	1.07537	-0.392779	-0.853885	-0.527391	-0.513037	-0.838768	-1.35497	1.7578	0.968621	1.16911	-0.0490631	1.29041	5.62367e-05	NM_021532	RefSeq	Mus musculus dapper homolog 1, antagonist of beta-catenin (xenopus) (Dact1), mRNA.	FALSE	GO:0007275 // GO:0008150 // GO:0016055	multicellular organismal development // biological_process // Wnt receptor signaling pathway	GO:0005575 // GO:0005634 // GO:0005737	cellular_component // nucleus // cytoplasm	GO:0003674 // GO:0005515	molecular_function // protein binding	---	---
10471419	2236	Naif1	-0.384244	-0.591262	-0.978639	-0.611035	-0.913879	0.18393	0.961127	1.95845	0.966047	1.74486	-0.787596	-0.916971	-0.883654	-0.486821	0.261863	0.299608	1.16293	1.40319	0.880653	1.04346	-1.13494	-1.08101	0.00950347	-1.23857	-0.867016	5.65197e-05	NM_194335	RefSeq	Mus musculus nuclear apoptosis inducing factor 1 (Naif1), mRNA.	FALSE	GO:0006915 // GO:0006917	apoptosis // induction of apoptosis	GO:0005634	nucleus	---	---	---	---
10386683	805	Slc47a1	0.341416	1.75746	0.434704	0.531523	0.533154	-0.513627	-0.929134	-1.51989	-0.776676	-0.857551	1.91315	0.180536	0.425433	0.868852	1.5345	-0.977583	-0.909831	-0.889254	-0.748969	-1.65954	1.11219	0.506657	-0.608662	0.623058	-0.371914	5.67021e-05	NM_026183	RefSeq	Mus musculus solute carrier family 47, member 1 (Slc47a1), mRNA.	FALSE	GO:0006810 // GO:0006855	transport // multidrug transport	GO:0005886 // GO:0016020 // GO:0016021	plasma membrane // membrane // integral to membrane	GO:0015238 // GO:0015297	drug transporter activity // antiporter activity	---	---
10596303	1720	Acpp	-0.584993	-0.418205	-0.363904	-0.614395	-0.712384	0.389138	0.516504	2.10811	1.79513	2.14114	-0.778974	-0.830642	-1.05943	-0.494532	-0.423359	0.890688	0.553318	0.987787	0.245692	0.985906	-1.12654	-0.797085	-0.846319	-0.825937	-0.736721	5.81915e-05	NM_019807	RefSeq	Mus musculus acid phosphatase, prostate (Acpp), transcript variant 2, mRNA.	FALSE	GO:0008150	biological_process	GO:0005576 // GO:0005764 // GO:0016020	extracellular region // lysosome // membrane	GO:0003993 // GO:0016787	acid phosphatase activity // hydrolase activity	---	---
10600707	1690	Nr0b1	-0.982474	-0.11539	-0.904918	-0.945316	-0.888937	0.610433	0.69184	1.30789	1.67688	1.61073	-0.415975	-1.72553	-0.509121	-0.221778	-0.245695	0.365633	1.38803	0.747797	0.614049	1.5796	-0.704554	-0.901772	-0.529688	-1.39186	-0.109881	5.81915e-05	NM_007430	RefSeq	Mus musculus nuclear receptor subfamily 0, group B, member 1 (Nr0b1), mRNA.	FALSE	GO:0000122 // GO:0000122 // GO:0006350 // GO:0006355 // GO:0006950 // GO:0007283 // GO:0007530 // GO:0008584 // GO:0016481 // GO:0030154 // GO:0030238 // GO:0030238 // GO:0030325 // GO:0033327 // GO:0045596 // GO:0060008	negative regulation of transcription from RNA polymerase II promoter // negative regulation of transcription from RNA polymerase II promoter // transcription // regulation of transcription, DNA-dependent // response to stress // spermatogenesis // sex determination // male gonad development // negative regulation of transcription // cell differentiation // male sex determination // male sex deter…	GO:0005634 // GO:0005737 // GO:0042788	nucleus // cytoplasm // polysomal ribosome	GO:0003677 // GO:0003700 // GO:0003707 // GO:0003714 // GO:0003723 // GO:0004872 // GO:0004879 // GO:0005515 // GO:0016564	DNA binding // transcription factor activity // steroid hormone receptor activity // transcription corepressor activity // RNA binding // receptor activity // ligand-dependent nuclear receptor activity // protein binding // transcription repressor activity	---	---
10492123	1146	Sohlh2	0.340416	2.1028	0.672212	0.4814	0.55344	-0.979084	-0.259456	-0.48571	-0.794752	-0.361733	1.06184	0.412154	1.17582	1.64306	1.81672	-0.97215	-1.09689	-0.599726	-0.964109	-1.10539	0.501761	-0.419982	-1.22607	-0.578738	-0.91783	5.81915e-05	NM_028937	RefSeq	Mus musculus spermatogenesis and oogenesis specific basic helix-loop-helix 2 (Sohlh2), mRNA.	FALSE	GO:0006350 // GO:0006355 // GO:0007275 // GO:0007283 // GO:0030154 // GO:0045449 // GO:0048477	transcription // regulation of transcription, DNA-dependent // multicellular organismal development // spermatogenesis // cell differentiation // regulation of transcription // oogenesis	GO:0005634	nucleus	GO:0003677 // GO:0030528	DNA binding // transcription regulator activity	---	---
10452496	2057	Ralbp1	-0.791031	-1.41747	-1.12728	-0.670317	-0.787756	0.0559869	0.656483	1.05334	1.98462	1.01385	-0.476726	-1.48424	-0.884751	-0.57026	0.230259	1.06701	1.16378	0.502678	0.823987	1.32751	0.740282	-0.204357	-0.0967067	-1.73019	-0.378706	5.82571e-05	NM_009067	RefSeq	Mus musculus ralA binding protein 1 (Ralbp1), mRNA.	FALSE	GO:0006810 // GO:0007165 // GO:0043089	transport // signal transduction // positive regulation of Cdc42 GTPase activity	GO:0005622 // GO:0016020	intracellular // membrane	GO:0005096 // GO:0005515 // GO:0017160 // GO:0030675	GTPase activator activity // protein binding // Ral GTPase binding // Rac GTPase activator activity	---	---
10375559	1982	---	-0.398355	-1.31336	-0.414674	-0.271537	-0.391351	0.121611	0.963854	1.44724	1.24768	1.42031	-1.46126	-0.473394	-0.690447	-0.580769	-1.40825	0.674924	1.42083	1.32392	0.0300488	0.955007	0.731568	-0.215284	0.113321	-1.73614	-1.09551	5.87951e-05	---	---	---	---	---	---	---	---	---	---	---	---
10434645	1923	Senp2	-1.67947	-0.518125	-0.0394171	-0.349196	-0.960336	1.04687	1.30029	1.76464	1.26688	0.283573	-0.776639	-0.365867	-0.931277	-1.67975	-1.12341	0.469502	1.52959	0.512074	0.453439	1.34022	-0.139626	-0.891337	0.159366	-0.928436	0.256449	5.87951e-05	NM_029457	RefSeq	Mus musculus SUMO/sentrin specific peptidase 2 (Senp2), mRNA.	FALSE	GO:0006350 // GO:0006355 // GO:0006508 // GO:0006511 // GO:0006810 // GO:0015031 // GO:0016055 // GO:0016926 // GO:0051028 // GO:0065002	transcription // regulation of transcription, DNA-dependent // proteolysis // ubiquitin-dependent protein catabolic process // transport // protein transport // Wnt receptor signaling pathway // protein desumoylation // mRNA transport // intracellular protein transmembrane transport	GO:0005634 // GO:0005643 // GO:0005737 // GO:0016020 // GO:0031410	nucleus // nuclear pore // cytoplasm // membrane // cytoplasmic vesicle	GO:0008233 // GO:0008234 // GO:0016787	peptidase activity // cysteine-type peptidase activity // hydrolase activity	---	---
10434233	1778	Ufd1l	0.0273962	-0.490726	-0.730716	-0.606231	-0.233826	0.214671	0.774106	0.411938	0.779093	1.7374	-0.287611	-0.062753	-0.867364	-0.676198	-0.720371	1.27847	1.78504	0.937643	1.23902	0.889998	-0.758365	-0.626846	-0.412476	-2.47015	-1.13114	5.87951e-05	NM_011672	RefSeq	Mus musculus ubiquitin fusion degradation 1 like (Ufd1l), mRNA.	FALSE	GO:0006511	ubiquitin-dependent protein catabolic process	---	---	---	---	---	---
10377439	2013	Per1	-0.395519	-1.1109	-1.4259	-1.45826	-1.22	0.366967	0.888063	1.49102	1.3324	0.426443	-1.29127	-0.723765	-0.496376	-0.985477	-0.384844	0.970552	1.47787	0.0392044	0.447449	2.18306	-0.420701	0.0523494	0.0935444	0.0072179	0.136883	5.92745e-05	NM_011065	RefSeq	Mus musculus period homolog 1 (Drosophila) (Per1), mRNA.	FALSE	GO:0000160 // GO:0006350 // GO:0006355 // GO:0007165 // GO:0007623 // GO:0016481 // GO:0048511	two-component signal transduction system (phosphorelay) // transcription // regulation of transcription, DNA-dependent // signal transduction // circadian rhythm // negative regulation of transcription // rhythmic process	GO:0005634 // GO:0005737	nucleus // cytoplasm	GO:0000155 // GO:0004871 // GO:0005515	two-component sensor activity // signal transducer activity // protein binding	---	---
10410235	1638	---	-0.43575	-0.755993	-0.660201	-0.313252	-0.322967	0.860467	1.04937	0.87053	1.43043	1.20547	-0.492663	-0.708334	-0.449351	0.409643	0.50687	0.560304	1.51971	0.786185	0.74537	1.01871	-0.659647	-1.08724	-1.92939	-1.57926	-1.569	5.92745e-05	GENSCAN00000044703	ENSEMBL	cdna:Genscan chromosome:NCBIM37:13:66480170:66542256:-1	FALSE	---	---	---	---	---	---	---	---
10408656	797	Peci	0.913007	1.44528	0.550506	0.648594	1.04253	-1.57795	-0.726905	0.163121	-1.46712	-0.536933	0.966846	0.763951	0.990781	0.459997	1.70151	-0.548219	-0.849079	-0.461217	-1.96875	-1.45706	0.143294	-0.204844	-0.675936	0.64858	0.0360237	5.92745e-05	NM_011868	RefSeq	Mus musculus peroxisomal delta3, delta2-enoyl-Coenzyme A isomerase (Peci), transcript variant 2, mRNA.	FALSE	GO:0008152	metabolic process	GO:0005777	peroxisome	GO:0000062 // GO:0003824 // GO:0004165 // GO:0005488 // GO:0016853	acyl-CoA binding // catalytic activity // dodecenoyl-CoA delta-isomerase activity // binding // isomerase activity	---	---
10505163	793	Zkscan16	0.258531	1.36255	0.649288	-0.117001	-0.0113762	-2.34633	-1.13167	-1.21097	-1.09463	-0.51936	1.05158	1.69169	0.802019	1.3507	1.5312	-0.241834	-0.718529	-0.0846983	-0.422111	-1.04805	-0.413992	-0.239884	-0.32271	0.927801	0.297785	5.92745e-05	NM_001099323	RefSeq	Mus musculus zinc finger with KRAB and SCAN domains 16 (Zkscan16), mRNA.	FALSE	GO:0006350 // GO:0006355	transcription // regulation of transcription, DNA-dependent	GO:0005634	nucleus	GO:0008270 // GO:0046872	zinc ion binding // metal ion binding	---	---
10471535	2254	Fam129b	-0.865491	-0.777287	-0.542507	-0.564963	-0.612842	0.414739	0.070485	1.58389	1.41029	1.68153	-0.301681	0.0306149	-1.16958	-0.720836	-0.948546	1.21892	1.97938	0.738556	0.791875	0.867742	-0.845797	-1.15337	-0.523606	-0.685972	-1.07554	5.93556e-05	BC027843	GenBank	Mus musculus RIKEN cDNA 9130404D14 gene, mRNA (cDNA clone MGC:38300 IMAGE:5343013), complete cds.	FALSE	---	---	---	---	---	---	---	---
10595702	1229	1190002N15Rik	-1.08133	-0.802035	-0.781072	-0.32597	-0.892319	-0.0844036	0.517049	1.56814	0.998069	1.27548	-1.46382	-1.51878	-1.43125	-0.87209	-1.05042	0.470424	-0.119488	0.931102	-0.459032	0.300306	0.866091	1.36571	1.48242	0.301348	0.80588	6.08565e-05	NM_001033145	RefSeq	Mus musculus RIKEN cDNA 1190002N15 gene (1190002N15Rik), mRNA.	FALSE	---	---	GO:0005576	extracellular region	---	---	---	---
10561187	1997	Mia1	-1.0051	-1.50644	-0.186827	-0.337703	-0.375169	0.504461	1.27966	1.40603	1.16051	0.896745	-1.8676	-0.199818	-1.41571	-0.169181	-0.94391	0.703696	0.546411	1.69798	0.991318	1.04123	-0.15541	0.173136	-1.3034	-0.354648	-0.580251	6.12237e-05	NM_019394	RefSeq	Mus musculus melanoma inhibitory activity 1 (Mia1), mRNA.	FALSE	GO:0007160 // GO:0030198	cell-matrix adhesion // extracellular matrix organization	GO:0005576	extracellular region	GO:0008083	growth factor activity	---	---
10585048	2004	Cadm1	-0.896843	-1.27243	-0.23616	-1.23999	-0.95945	0.795914	1.05203	1.89337	0.871886	0.783363	-1.42156	-1.86879	-0.540847	-1.48366	-0.400543	0.161332	-0.310616	0.900439	0.320567	0.602851	0.00329792	1.13396	0.737481	0.580858	0.793543	6.20482e-05	NM_207675	RefSeq	Mus musculus cell adhesion molecule 1 (Cadm1), transcript variant 1, mRNA.	FALSE	GO:0006915 // GO:0006955 // GO:0007049 // GO:0007155 // GO:0007156 // GO:0007157 // GO:0007275 // GO:0007283 // GO:0007416 // GO:0008037 // GO:0016338 // GO:0030154 // GO:0042271 // GO:0045786 // GO:0051606	apoptosis // immune response // cell cycle // cell adhesion // homophilic cell adhesion // heterophilic cell adhesion // multicellular organismal development // spermatogenesis // synaptogenesis // cell recognition // calcium-independent cell-cell adhesion // cell differentiation // susceptibility to natural killer cell mediated cytotoxicity // negative regulation of cell cycle // detection of st…	GO:0005886 // GO:0005911 // GO:0008021 // GO:0016020 // GO:0016021 // GO:0016323 // GO:0030424 // GO:0030425 // GO:0045202	plasma membrane // cell-cell junction // synaptic vesicle // membrane // integral to membrane // basolateral plasma membrane // axon // dendrite // synapse	GO:0005102 // GO:0005515 // GO:0008022 // GO:0030165 // GO:0042803	receptor binding // protein binding // protein C-terminus binding // PDZ domain binding // protein homodimerization activity	---	---
10408044	796	Cox5b	0.38215	1.90068	0.987617	0.753303	0.411921	-1.26047	-0.387855	-0.719247	-1.28809	-0.534523	0.588287	0.736443	0.717956	0.612681	1.96749	-0.467372	-0.915915	-0.794828	-1.71724	-1.86884	0.588287	0.387095	-0.00914158	0.119907	-0.190297	6.20482e-05	X53157	GenBank	Mouse mRNA for mitochondrial cytochrome c oxidase subunit Vb.	FALSE	---	---	GO:0005739 // GO:0005740 // GO:0005743 // GO:0016020	mitochondrion // mitochondrial envelope // mitochondrial inner membrane // membrane	GO:0004129 // GO:0008270 // GO:0046872	cytochrome-c oxidase activity // zinc ion binding // metal ion binding	GenMAPP	Electron_Transport_Chain
10595392	23	Elovl4	0.775676	2.05833	0.762893	0.110678	0.127056	-0.829265	-0.626948	-0.654002	-1.52078	-1.66128	1.32817	0.78833	0.199987	1.19243	1.43937	-0.367435	-0.812965	-0.913794	-1.15258	-1.27879	-0.438968	0.393809	0.0728732	1.04946	-0.0422464	6.20482e-05	NM_148941	RefSeq	Mus musculus elongation of very long chain fatty acids (FEN1/Elo2, SUR4/Elo3, yeast)-like 4 (Elovl4), mRNA.	FALSE	GO:0006633 // GO:0008610	fatty acid biosynthetic process // lipid biosynthetic process	GO:0005783 // GO:0016020 // GO:0016021	endoplasmic reticulum // membrane // integral to membrane	---	---	---	---
10425283	2322	Maff	-0.830595	-0.784001	-1.03188	-0.843708	-0.647956	0.463652	0.405728	1.52979	1.4336	1.15074	-0.0473717	-1.0508	-0.709634	-0.958595	-0.227542	0.631893	1.98065	0.941826	0.0412503	1.45067	-0.0345094	-1.71079	-1.24286	0.161025	-0.0705776	6.22036e-05	NM_010755	RefSeq	Mus musculus v-maf musculoaponeurotic fibrosarcoma oncogene family, protein F (avian) (Maff), mRNA.	FALSE	GO:0001701 // GO:0006350 // GO:0006355 // GO:0045604	in utero embryonic development // transcription // regulation of transcription, DNA-dependent // regulation of epidermal cell differentiation	GO:0005634	nucleus	GO:0003677 // GO:0003700 // GO:0043565 // GO:0046983	DNA binding // transcription factor activity // sequence-specific DNA binding // protein dimerization activity	---	---
10364814	1893	Scamp4	0.00341382	-0.115564	-0.0813156	-0.128958	0.636182	0.78057	0.949261	1.6823	1.31974	2.13637	-1.08851	-0.51519	-0.857133	-1.57437	-0.882815	0.816485	0.309164	0.37264	0.741624	-0.0202282	-1.72477	-0.55555	-0.0693153	-1.5427	-0.591348	6.22036e-05	NM_019575	RefSeq	Mus musculus secretory carrier membrane protein 4 (Scamp4), mRNA.	FALSE	GO:0006810 // GO:0015031	transport // protein transport	GO:0016020 // GO:0016021	membrane // integral to membrane	---	---	---	---
10444853	1699	Pou5f1	-0.585031	-0.352487	-0.745804	-0.185778	-0.813099	0.885764	0.918636	1.57298	1.49536	1.81195	0.379698	-0.87211	-0.868256	-0.411321	-0.402106	0.188799	1.02071	1.04822	0.357635	1.29472	-1.07302	-1.16814	-1.34198	-0.919469	-1.23588	6.22105e-05	NM_013633	RefSeq	Mus musculus POU domain, class 5, transcription factor 1 (Pou5f1), mRNA.	FALSE	GO:0000122 // GO:0001710 // GO:0001711 // GO:0001712 // GO:0001829 // GO:0006350 // GO:0006355 // GO:0006366 // GO:0019827 // GO:0030718 // GO:0032526 // GO:0042221 // GO:0045165 // GO:0045449 // GO:0045596 // GO:0045892 // GO:0045893 // GO:0045944 // GO:0045944 // GO:0045944 // GO:0045955	negative regulation of transcription from RNA polymerase II promoter // mesodermal cell fate commitment // endodermal cell fate commitment // ectodermal cell fate commitment // trophectodermal cell differentiation // transcription // regulation of transcription, DNA-dependent // transcription from RNA polymerase II promoter // stem cell maintenance // germ-line stem cell maintenance // response t…	GO:0005634 // GO:0005634 // GO:0005667 // GO:0005737 // GO:0017053	nucleus // nucleus // transcription factor complex // cytoplasm // transcriptional repressor complex	GO:0003677 // GO:0003677 // GO:0003682 // GO:0003700 // GO:0003714 // GO:0005515 // GO:0043565	DNA binding // DNA binding // chromatin binding // transcription factor activity // transcription corepressor activity // protein binding // sequence-specific DNA binding	---	---
10430804	438	Fam152b	0.712241	0.813961	0.832804	1.24619	1.12926	-1.02618	-1.44238	-0.549965	-0.693084	-0.748418	0.994184	1.15384	0.144598	0.594711	0.145788	-0.146153	-1.93664	-0.445963	-1.09198	-2.14544	0.760398	0.202597	0.126465	1.30813	0.0610301	6.22105e-05	BC056972	GenBank	Mus musculus DNA segment, Chr 15, Wayne State University 75, expressed, mRNA (cDNA clone MGC:66796 IMAGE:6811343), complete cds.	FALSE	---	---	---	---	---	---	---	---
10396800	1701	Plekhh1	-0.713861	-0.960652	-0.587948	-0.530396	-1.2952	0.743296	1.00298	1.38457	1.63267	1.5084	-0.339594	-0.743925	-0.632554	-0.480172	0.554495	0.415912	1.41255	0.994947	0.312494	1.31781	-0.712309	-0.963877	-0.862352	-1.38362	-1.07367	6.30594e-05	AK122464	GenBank	Mus musculus mRNA for mKIAA1200 protein.	FALSE	---	---	GO:0005856	cytoskeleton	GO:0005488	binding	---	---
10390246	1008	Calcoco2	1.11142	0.298014	1.19113	0.995371	0.959275	-1.15845	-0.793977	-0.554473	-1.38547	-0.363052	0.609061	0.0015277	1.71282	1.53555	1.31957	-0.389215	-1.13858	-0.493351	0.0222837	-1.12072	0.230324	-0.436998	-0.0521869	-2.10158	0.00170794	6.31249e-05	NM_029755	RefSeq	Mus musculus calcium binding and coiled-coil domain 2 (Calcoco2), transcript variant 1, mRNA.	FALSE	GO:0008150	biological_process	GO:0005737 // GO:0005794 // GO:0005856 // GO:0016605	cytoplasm // Golgi apparatus // cytoskeleton // PML body	GO:0003674	molecular_function	---	---
10360848	2080	Mosc2	-0.71666	-0.111965	-0.446497	-0.79936	-0.869603	0.618022	0.870553	2.0498	1.39605	1.53321	-0.680537	-0.348576	-0.273712	-0.622987	-0.201791	0.384817	0.976321	0.849236	0.258354	1.66514	-0.654765	-0.953637	-1.43091	-1.26602	-1.22449	6.33519e-05	NM_133684	RefSeq	Mus musculus MOCO sulphurase C-terminal domain containing 2 (Mosc2), mRNA.	FALSE	GO:0055114	oxidation reduction	GO:0005739 // GO:0005741 // GO:0005743 // GO:0016020	mitochondrion // mitochondrial outer membrane // mitochondrial inner membrane // membrane	GO:0003824 // GO:0016491 // GO:0030151 // GO:0030170	catalytic activity // oxidoreductase activity // molybdenum ion binding // pyridoxal phosphate binding	---	---
10512024	191	Mobkl2b	-0.197414	0.021664	0.618204	0.679807	0.528902	-1.3514	-1.1306	-1.50406	-1.50488	-0.977439	1.01807	1.27532	1.24993	0.842148	0.965988	-0.0421337	-2.12625	-0.702909	-0.0480382	-0.25918	0.165079	-0.173026	1.65605	0.501517	0.494651	6.36519e-05	NM_178061	RefSeq	Mus musculus MOB1, Mps One Binder kinase activator-like 2B (yeast) (Mobkl2b), mRNA.	FALSE	---	---	---	---	GO:0005515 // GO:0008270 // GO:0046872	protein binding // zinc ion binding // metal ion binding	---	---
10502375	64	Mttp	0.935567	1.36726	0.515483	0.615718	1.07128	-0.362451	0.0140824	-0.653524	-1.46177	-0.801774	1.20361	0.321291	1.32134	0.286467	0.0989961	-1.56655	-1.66093	-0.488683	-1.05818	-1.99469	0.881742	0.879611	0.612797	0.318763	-0.39546	6.37741e-05	NM_008642	RefSeq	Mus musculus microsomal triglyceride transfer protein (Mttp), mRNA.	FALSE	GO:0006497 // GO:0006629 // GO:0006641 // GO:0006810 // GO:0006869 // GO:0042157 // GO:0042632 // GO:0042953	protein amino acid lipidation // lipid metabolic process // triacylglycerol metabolic process // transport // lipid transport // lipoprotein metabolic process // cholesterol homeostasis // lipoprotein transport	GO:0005783	endoplasmic reticulum	GO:0005319 // GO:0008289	lipid transporter activity // lipid binding	---	---
10543697	479	Zc3hc1	0.213751	0.567407	1.22029	0.497684	0.808164	-1.11204	-0.906046	-0.260156	-0.824642	-0.993556	1.09473	0.0220293	-0.221899	0.404491	0.457243	-0.193547	-1.33851	-0.966261	-1.1393	-1.12158	-1.4794	1.17978	2.11722	0.48771	1.48643	6.42276e-05	NM_172735	RefSeq	Mus musculus zinc finger, C3HC type 1 (Zc3hc1), mRNA.	FALSE	GO:0006511 // GO:0006916 // GO:0007049 // GO:0007067 // GO:0051301	ubiquitin-dependent protein catabolic process // anti-apoptosis // cell cycle // mitosis // cell division	GO:0005634	nucleus	GO:0005515 // GO:0008270 // GO:0046872	protein binding // zinc ion binding // metal ion binding	---	---
10401109	1897	Gpx2	0.0431297	-0.629064	-0.48716	-0.343246	0.0831592	0.627976	1.26817	0.801287	1.36227	1.22417	-0.788388	-1.78862	-0.783423	-1.06758	-1.62269	0.78707	-0.00134057	1.23244	0.783263	1.8588	-0.40193	-0.505684	0.0954757	-1.5346	-0.213483	6.43934e-05	NM_030677	RefSeq	Mus musculus glutathione peroxidase 2 (Gpx2), mRNA.	FALSE	GO:0001659 // GO:0002862 // GO:0006979 // GO:0009609 // GO:0051702 // GO:0055114	temperature homeostasis // negative regulation of inflammatory response to antigenic stimulus // response to oxidative stress // response to symbiotic bacterium // interaction with symbiont // oxidation reduction	GO:0005737 // GO:0005829	cytoplasm // cytosol	GO:0004601 // GO:0004602 // GO:0004602 // GO:0008430 // GO:0016491	peroxidase activity // glutathione peroxidase activity // glutathione peroxidase activity // selenium binding // oxidoreductase activity	---	---
10403584	1705	Nid1	-0.838234	0.098349	-1.02408	-1.02566	-1.11943	0.737268	0.721576	1.56535	1.46017	1.4894	-0.178565	-0.778282	-0.761802	-0.217763	0.323873	0.780163	1.28928	0.70439	0.522687	1.14616	0.104258	-1.13679	-1.34618	-1.43671	-1.07942	6.43934e-05	NM_010917	RefSeq	Mus musculus nidogen 1 (Nid1), mRNA.	FALSE	GO:0007155 // GO:0007160 // GO:0010811 // GO:0030198 // GO:0032836	cell adhesion // cell-matrix adhesion // positive regulation of cell-substrate adhesion // extracellular matrix organization // glomerular basement membrane development	GO:0005576 // GO:0005578 // GO:0005604 // GO:0005604 // GO:0005604 // GO:0016020	extracellular region // proteinaceous extracellular matrix // basement membrane // basement membrane // basement membrane // membrane	GO:0005509 // GO:0005515 // GO:0050840	calcium ion binding // protein binding // extracellular matrix binding	---	---
10553080	1385	Car11	-1.17745	-1.13161	-0.240692	-0.842592	-0.650363	0.6447	1.48404	0.0448479	0.368947	0.523749	-0.910046	-0.59766	-1.45799	-1.17347	-0.833438	1.32629	0.30191	0.341835	0.800418	1.74833	-1.27776	0.888911	1.88459	0.176929	-0.242413	6.43934e-05	NM_009800	RefSeq	Mus musculus carbonic anhydrase 11 (Car11), mRNA.	FALSE	GO:0006730	one-carbon compound metabolic process	GO:0005576	extracellular region	GO:0004089 // GO:0008270	carbonate dehydratase activity // zinc ion binding	---	---
10596277	1859	Dnajc13	-0.338773	-1.587	-0.301826	-1.08663	-1.45763	0.455904	0.840443	1.07615	1.17104	0.0940218	-0.342762	-1.83032	-1.30682	-0.265166	-1.12	0.563852	1.39743	0.931325	0.66399	1.58711	1.03074	-0.575461	-0.229774	-0.0555589	0.685722	6.4592e-05	ENSMUST00000060084	ENSEMBL	Putative uncharacterized protein (Fragment) gene:ENSMUSG00000054574	FALSE	GO:0008150	biological_process	GO:0005575	cellular_component	GO:0003674	molecular_function	---	---
10510056	753	Pramel1	1.27275	1.63291	0.949551	0.778707	0.651062	-0.426075	-0.768368	0.0206004	-0.899561	-1.77273	1.29622	0.133346	1.73589	0.204471	1.49302	-0.706767	-1.41513	-0.530837	-1.0351	-0.970052	-0.354189	0.0763391	-0.380896	-1.00127	0.0161065	6.4832e-05	NM_031377	RefSeq	Mus musculus preferentially expressed antigen in melanoma-like 1 (Pramel1), mRNA.	FALSE	---	---	---	---	---	---	---	---
10396170	249	Frmd6	-0.0393447	0.525992	0.851315	0.258535	0.299891	-1.33806	-2.29505	-0.942409	-0.651686	-1.43546	1.08835	0.674712	1.14944	1.56128	1.04488	0.0145897	-0.146077	-0.107923	-0.103904	-1.26479	0.624443	-0.190668	1.31706	-1.37322	0.478089	6.51225e-05	NM_028127	RefSeq	Mus musculus FERM domain containing 6 (Frmd6), mRNA.	FALSE	---	---	GO:0005737 // GO:0005856 // GO:0005886 // GO:0016020	cytoplasm // cytoskeleton // plasma membrane // membrane	GO:0005488	binding	---	---
10582545	1413	Mela	-0.951261	-1.58668	-1.56216	-1.07915	-1.4743	0.93889	0.806643	0.861039	0.711598	0.421364	-1.31284	1.08614	-0.689533	0.0978058	-1.02974	1.23011	1.46304	1.06535	1.17489	0.901236	-0.48849	0.0804659	-0.274953	-0.107712	-0.281763	6.52673e-05	D10049	GenBank	Mus musculus mRNA for melanoma antigen, complete cds, endogenous ecotropic murine leukemia provirus region.	FALSE	---	---	GO:0019031	viral envelope	GO:0003964	RNA-directed DNA polymerase activity	---	---
10397002	2323	Sipa1l1	-1.44956	-1.15669	-0.557346	-1.06737	-1.33597	0.762658	0.719591	1.92652	1.27602	1.58877	-0.146386	-1.02129	-0.48427	-0.332305	-0.391244	0.395375	1.04493	1.02201	0.00970998	1.41401	-0.356644	-1.09086	-0.136227	-1.01375	0.380317	6.53083e-05	NM_172579	RefSeq	Mus musculus signal-induced proliferation-associated 1 like 1 (Sipa1l1), mRNA.	FALSE	GO:0051056	regulation of small GTPase mediated signal transduction	GO:0005622	intracellular	GO:0005096 // GO:0005515	GTPase activator activity // protein binding	---	---
10463670	1803	Sfxn2	-0.277254	-1.14709	-0.255066	-0.27286	0.24074	0.65764	0.332369	1.12566	1.70978	1.54854	-0.852261	-0.216485	-0.681472	-0.950804	-1.53104	1.20251	1.00181	0.929576	1.52501	0.571884	-1.03393	-0.376503	-1.2267	-1.18854	-0.835515	6.55389e-05	NM_053196	RefSeq	Mus musculus sideroflexin 2 (Sfxn2), mRNA.	FALSE	GO:0006810 // GO:0006811 // GO:0006812 // GO:0006826	transport // ion transport // cation transport // iron ion transport	GO:0005739 // GO:0005739 // GO:0005743 // GO:0016020 // GO:0016021	mitochondrion // mitochondrion // mitochondrial inner membrane // membrane // integral to membrane	GO:0005506 // GO:0008324	iron ion binding // cation transmembrane transporter activity	---	---
10447594	135	Dynlt1	0.166775	0.246642	0.919604	0.435921	0.508024	-0.612633	-0.534441	-0.227407	-1.60442	-1.4126	0.813994	0.232112	1.22451	0.668403	0.941093	-0.905974	-2.19352	-0.831519	-1.09506	-1.06648	1.72231	0.929752	0.0678348	0.802171	0.804909	6.58385e-05	NM_009342	RefSeq	Mus musculus dynein light chain Tctex-type 1 (Dynlt1), mRNA.	FALSE	GO:0007017	microtubule-based process	GO:0005794 // GO:0005858 // GO:0005868 // GO:0005868 // GO:0005874 // GO:0030286	Golgi apparatus // axonemal dynein complex // cytoplasmic dynein complex // cytoplasmic dynein complex // microtubule // dynein complex	GO:0003774 // GO:0005515	motor activity // protein binding	---	---
10475051	2309	Mga	-0.521818	-1.49565	-1.10418	-0.399059	-0.513255	1.1456	0.783049	1.58383	1.90955	1.28467	-1.06623	-1.28744	-0.583906	-0.731844	-0.885144	-0.270396	1.06183	1.57358	-0.17533	0.93638	0.171511	-0.370742	-0.908404	-0.265707	0.129098	6.75421e-05	NM_013720	RefSeq	Mus musculus MAX gene associated (Mga), mRNA.	FALSE	GO:0006350 // GO:0006355 // GO:0045449	transcription // regulation of transcription, DNA-dependent // regulation of transcription	GO:0005634 // GO:0005667	nucleus // transcription factor complex	GO:0003677 // GO:0003700 // GO:0030528	DNA binding // transcription factor activity // transcription regulator activity	---	---
10536176	1966	Ccdc132	-1.17166	-0.80942	-0.413274	-1.31276	-0.387551	0.204639	0.704318	1.46288	1.27962	1.71459	-0.448894	-0.239723	-1.29661	-1.14615	-1.30053	-0.0182133	1.63031	1.50845	1.02156	0.541683	-0.19561	0.231376	0.0883225	-0.833276	-0.814078	6.75421e-05	NM_024260	RefSeq	Mus musculus coiled-coil domain containing 132 (Ccdc132), mRNA.	FALSE	---	---	---	---	---	---	---	---
10585146	2108	Tmprss5	-0.594579	0.110222	-1.01828	-0.311337	-0.362077	0.906241	0.153098	2.06379	1.7882	1.65125	-1.40206	-0.952345	-0.638595	-0.942033	-1.32197	-0.0202002	0.44249	0.647391	1.25418	0.927636	-1.41638	-0.144229	-0.17266	-0.558701	-0.0890606	6.82696e-05	NM_030709	RefSeq	Mus musculus transmembrane protease, serine 5 (spinesin) (Tmprss5), mRNA.	FALSE	GO:0006508	proteolysis	GO:0005886 // GO:0016020 // GO:0016021	plasma membrane // membrane // integral to membrane	GO:0004252 // GO:0005044 // GO:0008233 // GO:0008236 // GO:0016787	serine-type endopeptidase activity // scavenger receptor activity // peptidase activity // serine-type peptidase activity // hydrolase activity	---	---
10516778	1019	Zcchc17	0.907004	1.44008	0.614035	0.828538	1.04866	-1.32419	-0.960869	-0.960134	-0.0709568	-0.0263644	0.712601	0.334665	1.63446	1.32172	1.52653	-1.31358	-0.208584	-0.380537	-1.06595	-1.8805	-0.464794	-0.162307	-0.0636982	-0.618769	-0.867056	6.82813e-05	NM_153160	RefSeq	Mus musculus zinc finger, CCHC domain containing 17 (Zcchc17), mRNA.	FALSE	---	---	GO:0005634 // GO:0005730 // GO:0022625 // GO:0030529	nucleus // nucleolus // cytosolic large ribosomal subunit // ribonucleoprotein complex	GO:0003676 // GO:0003723 // GO:0008270 // GO:0046872	nucleic acid binding // RNA binding // zinc ion binding // metal ion binding	GenMAPP	mRNA_processing_binding_Reactome
10463661	1610	Trim8	-0.295019	0.328352	-0.166561	-0.206908	0.262228	0.724622	0.748912	0.754208	1.61667	1.80057	-0.0533918	-0.707973	-0.349972	-0.196604	-0.634842	0.571285	0.564988	0.717553	0.983544	1.0352	-1.32816	-1.9127	-1.10884	-1.95001	-1.19715	6.88466e-05	NM_053100	RefSeq	Mus musculus tripartite motif protein 8 (Trim8), mRNA.	FALSE	---	---	GO:0005622 // GO:0005634	intracellular // nucleus	GO:0005515 // GO:0008270 // GO:0046872	protein binding // zinc ion binding // metal ion binding	---	---
10536334	1826	Dync1i1	-0.19493	0.131262	-1.30891	-0.286846	-1.07159	0.494137	1.60489	0.295187	1.00861	1.20328	-0.879887	-0.427509	-1.1282	-0.499253	-1.32498	0.648039	1.32077	1.04508	1.00637	1.96077	-0.859137	-0.981527	-0.157365	-0.427181	-1.17109	7.04179e-05	NM_010063	RefSeq	Mus musculus dynein cytoplasmic 1 intermediate chain 1 (Dync1i1), mRNA.	FALSE	---	---	GO:0005874 // GO:0030286	microtubule // dynein complex	GO:0003774 // GO:0005515	motor activity // protein binding	---	---
10441511	223		0.88701	1.05331	0.565341	0.532244	0.287381	-1.44234	-0.939563	-1.60059	-1.6805	-1.25398	0.505081	0.957827	0.164701	0.602067	1.6445	-0.110466	-0.300602	-0.538391	-0.345901	-1.84853	1.2591	1.00226	-0.397965	0.66457	0.333455	7.04707e-05
10463347	903	Scd3	1.45948	0.364386	1.03799	1.32908	1.34317	-0.220094	-0.419924	-0.946171	-0.130911	0.0810465	-0.134677	1.02872	1.90574	0.864888	1.19864	-0.676761	-0.85141	-0.56907	-0.968796	-1.17575	-0.863061	-1.22679	-0.923375	-0.0504475	-1.4559	7.09764e-05	NM_024450	RefSeq	Mus musculus stearoyl-coenzyme A desaturase 3 (Scd3), mRNA.	FALSE	GO:0055114	oxidation reduction	---	---	GO:0016491	oxidoreductase activity	---	---
10421697	421	9030625A04Rik	0.772409	1.7177	0.522161	0.303171	0.362546	-1.50851	-1.56433	-1.3467	-2.06546	-1.21121	0.555141	0.723557	0.438057	1.01073	0.622875	-0.0502535	-0.506704	-0.0424834	-0.773279	-1.37006	1.02741	0.425644	0.607982	0.651844	0.697765	7.09764e-05	BC116748	GenBank	Mus musculus RIKEN cDNA 9030625A04 gene, mRNA (cDNA clone MGC:151125 IMAGE:40126067), complete cds.	FALSE	---	---	---	---	---	---	---	---
10582809	270	Tk1	0.395991	0.836878	2.03069	1.22757	1.19582	-1.05672	-1.07232	-0.257989	-0.0432746	-0.951687	1.10013	0.666535	1.07351	0.0140765	0.262402	-0.671327	-1.63181	-0.814622	-2.16128	-0.811785	0.0176575	0.467622	-0.473952	0.643822	0.0140765	7.21323e-05	NM_009387	RefSeq	Mus musculus thymidine kinase 1 (Tk1), mRNA.	FALSE	GO:0006260	DNA replication	GO:0005737	cytoplasm	GO:0000166 // GO:0004797 // GO:0005524 // GO:0016301 // GO:0016740	nucleotide binding // thymidine kinase activity // ATP binding // kinase activity // transferase activity	---	---
10445664	1148	Guca1b	0.973505	1.92158	0.64217	0.613915	0.638143	-1.21579	-0.93842	-1.55983	-1.59868	-1.02657	2.25519	0.403774	0.30023	0.786043	1.285	-0.207489	-0.818743	-0.511528	-0.156617	-0.687017	-0.169729	0.333169	-0.506122	-0.366204	-0.389991	7.36339e-05	NM_146079	RefSeq	Mus musculus guanylate cyclase activator 1B (Guca1b), mRNA.	FALSE	GO:0007601 // GO:0007602 // GO:0031282 // GO:0050896	visual perception // phototransduction // regulation of guanylate cyclase activity // response to stimulus	GO:0005886 // GO:0016020	plasma membrane // membrane	GO:0005509 // GO:0008048 // GO:0030249	calcium ion binding // calcium sensitive guanylate cyclase activator activity // guanylate cyclase regulator activity	---	---
10373036	1474	Os9	-0.608685	-0.573863	-0.627105	-1.01507	-0.796546	0.679254	1.06015	1.93179	0.0991333	0.499974	-0.836503	0.0824752	-0.796983	-0.555732	0.0917057	1.12935	1.9629	0.642038	1.00039	1.43518	-0.693599	-1.36254	-0.669909	-0.559293	-1.51851	7.37224e-05	NM_177614	RefSeq	Mus musculus amplified in osteosarcoma (Os9), mRNA.	FALSE	---	---	---	---	---	---	---	---
10382956	1595	Tmc8	-0.636001	-0.884652	-0.69171	-0.214624	-1.16767	0.425715	0.992189	1.64851	1.3486	2.43346	-0.315547	-0.379971	-0.634319	-0.96655	-1.11547	0.990046	0.399399	1.202	0.146888	0.807528	-0.834717	0.0759955	-1.24875	-0.647697	-0.732657	7.43777e-05	NM_181856	RefSeq	Mus musculus transmembrane channel-like gene family 8 (Tmc8), mRNA.	FALSE	---	---	GO:0005783 // GO:0016020 // GO:0016021	endoplasmic reticulum // membrane // integral to membrane	---	---	---	---
10530417	1402	Cox7b2	-0.838003	-0.682242	-0.697878	-0.53335	-0.236346	0.347216	1.05067	0.755763	0.619098	0.287923	-1.0146	-0.63402	-1.18681	-1.2342	-0.364561	1.64834	0.459692	2.32201	1.1305	1.81582	-0.380499	-0.738531	-0.276085	-1.17957	-0.440349	7.50381e-05	NM_030052	RefSeq	Mus musculus cytochrome c oxidase subunit VIIb2 (Cox7b2), mRNA.	FALSE	---	---	---	---	---	---	---	---
10562523	584	Zfp507	0.180047	0.287396	0.768462	0.183277	0.217177	-0.49365	-0.554991	-0.733164	-1.49966	-1.39474	-0.190874	0.336771	0.421871	-0.168043	-0.115353	-1.08218	-1.23964	-0.514975	-0.796114	-1.35712	1.60879	1.66814	1.4473	1.71385	1.30743	7.51422e-05	NM_177739	RefSeq	Mus musculus zinc finger protein 507 (zfp507), mRNA.	FALSE	GO:0006350 // GO:0006355	transcription // regulation of transcription, DNA-dependent	GO:0005622 // GO:0005634	intracellular // nucleus	GO:0003677 // GO:0008270 // GO:0046872	DNA binding // zinc ion binding // metal ion binding	---	---
10503023	2072	Cth	-1.21703	-0.00480127	-0.394472	-0.856645	-0.646384	1.19237	1.11965	1.85054	1.57397	1.33185	-1.21714	-1.12666	0.222763	-0.851895	-0.13724	0.253449	0.848903	0.534445	0.449478	1.43414	-0.761316	-1.09838	-1.06045	-0.578094	-0.86105	7.54073e-05	NM_145953	RefSeq	Mus musculus cystathionase (cystathionine gamma-lyase) (Cth), mRNA.	FALSE	GO:0006520 // GO:0008652 // GO:0019344	amino acid metabolic process // amino acid biosynthetic process // cysteine biosynthetic process	GO:0005575 // GO:0005737	cellular_component // cytoplasm	GO:0003824 // GO:0004123 // GO:0016829 // GO:0030170	catalytic activity // cystathionine gamma-lyase activity // lyase activity // pyridoxal phosphate binding	---	---
10441718	1896	Park2	-0.235574	-0.687219	-0.333624	-0.166457	0.23982	1.48917	0.530769	1.3349	1.01471	1.74262	-1.27012	-2.16583	-1.17986	-0.511499	-1.8635	0.743632	0.280071	0.110399	0.381909	1.49369	-0.313616	-0.0164518	0.200488	-0.368104	-0.450322	7.59895e-05	NM_016694	RefSeq	Mus musculus Parkinson disease (autosomal recessive, juvenile) 2, parkin (Park2), mRNA.	FALSE	GO:0001963 // GO:0001964 // GO:0006464 // GO:0006511 // GO:0007612 // GO:0007626 // GO:0008344 // GO:0019538 // GO:0035249 // GO:0042415 // GO:0042417 // GO:0046928 // GO:0050804 // GO:0051583	synaptic transmission, dopaminergic // startle response // protein modification process // ubiquitin-dependent protein catabolic process // learning // locomotory behavior // adult locomotory behavior // protein metabolic process // synaptic transmission, glutamatergic // norepinephrine metabolic process // dopamine metabolic process // regulation of neurotransmitter secretion // regulation of sy…	GO:0005634 // GO:0005737 // GO:0005783 // GO:0005886 // GO:0016020 // GO:0030054 // GO:0042995 // GO:0043005 // GO:0043234 // GO:0045202 // GO:0045211	nucleus // cytoplasm // endoplasmic reticulum // plasma membrane // membrane // cell junction // cell projection // neuron projection // protein complex // synapse // postsynaptic membrane	GO:0005515 // GO:0008270 // GO:0016874 // GO:0016881 // GO:0046872	protein binding // zinc ion binding // ligase activity // acid-amino acid ligase activity // metal ion binding	---	---
10419062	1724	Sh2d4b	-0.424484	-1.07154	-0.566047	-0.954366	-0.981552	0.672273	0.759579	1.5063	2.52053	1.13684	-0.336698	-1.2566	-0.923206	-0.120111	-0.709157	0.180696	0.96826	0.931977	0.426187	1.26864	-1.25646	-0.313269	-0.368142	-1.01158	-0.07808	7.59895e-05	NM_177816	RefSeq	Mus musculus SH2 domain containing 4B (Sh2d4b), mRNA.	FALSE	---	---	---	---	GO:0005515	protein binding	---	---
10411519	1367	Mtap1b	-0.720788	-0.988308	-0.867067	-0.522642	-0.882031	0.937414	-0.0793493	0.412343	1.01695	0.21163	-1.3064	-0.460426	-1.59562	-1.4016	-1.60148	1.05585	1.50314	0.937525	-0.136939	1.47191	0.816548	-0.0863881	0.689102	1.39441	0.202219	7.93376e-05	NM_008634	RefSeq	Mus musculus microtubule-associated protein 1B (Mtap1b), mRNA.	FALSE	GO:0001578 // GO:0007017 // GO:0016358	microtubule bundle formation // microtubule-based process // dendrite development	GO:0005829 // GO:0005874 // GO:0005875	cytosol // microtubule // microtubule associated complex	GO:0005519	cytoskeletal regulatory protein binding	---	---
10379204	1709	Poldip2	-0.734177	-0.411141	-0.453436	-0.531075	-0.612507	0.508858	0.790463	1.76137	2.02846	2.24641	-0.236346	-0.79732	-0.962239	-0.660961	-0.444456	0.256364	0.884753	0.319659	0.524935	1.08666	-0.423261	-0.987211	-1.36813	-0.853005	-0.932656	7.98246e-05	NM_026389	RefSeq	Mus musculus polymerase (DNA-directed), delta interacting protein 2 (Poldip2), mRNA.	FALSE	---	---	GO:0005634 // GO:0005739	nucleus // mitochondrion	GO:0030674	protein binding, bridging	---	---
10478383	1609	OTTMUSG00000001070	0.092986	0.363463	-0.233792	0.00757456	0.0265673	0.710029	0.763495	0.654774	1.16133	1.44435	0.0377779	-0.302703	-0.870598	-0.36831	-1.24207	0.762927	1.08914	1.09873	1.01916	1.13467	-1.42337	-1.39765	-1.45132	-1.22077	-1.85637	7.98246e-05	NM_001099331	RefSeq	Mus musculus predicted gene, OTTMUSG00000001070 (OTTMUSG00000001070), mRNA.	FALSE	---	---	GO:0005576	extracellular region	GO:0004866	endopeptidase inhibitor activity	---	---
10563812	878	---	1.25589	0.970309	1.17174	1.32868	1.24906	-0.451559	-0.0370794	-0.563032	-0.380019	-0.284214	-0.450385	0.814026	1.64689	0.86233	1.25488	-0.474772	-0.213473	-0.250831	-0.465479	-0.773498	-0.479405	-0.867417	-1.37262	-1.87517	-1.61485	7.98246e-05	ENSMUST00000098422	ENSEMBL	cdna:pseudogene chromosome:NCBIM37:7:58206314:58206988:-1 gene:ENSMUSG00000074100	FALSE	---	---	---	---	---	---	---	---
10563810	877	---	1.25589	0.970309	1.17174	1.32868	1.24906	-0.451559	-0.0370794	-0.563032	-0.380019	-0.284214	-0.450385	0.814026	1.64689	0.86233	1.25488	-0.474772	-0.213473	-0.250831	-0.465479	-0.773498	-0.479405	-0.867417	-1.37262	-1.87517	-1.61485	7.98246e-05	ENSMUST00000098422	ENSEMBL	cdna:pseudogene chromosome:NCBIM37:7:58206314:58206988:-1 gene:ENSMUSG00000074100	FALSE	---	---	---	---	---	---	---	---
10563808	876	---	1.25589	0.970309	1.17174	1.32868	1.24906	-0.451559	-0.0370794	-0.563032	-0.380019	-0.284214	-0.450385	0.814026	1.64689	0.86233	1.25488	-0.474772	-0.213473	-0.250831	-0.465479	-0.773498	-0.479405	-0.867417	-1.37262	-1.87517	-1.61485	7.98246e-05	ENSMUST00000098422	ENSEMBL	cdna:pseudogene chromosome:NCBIM37:7:58206314:58206988:-1 gene:ENSMUSG00000074100	FALSE	---	---	---	---	---	---	---	---
10563806	875	---	1.25589	0.970309	1.17174	1.32868	1.24906	-0.451559	-0.0370794	-0.563032	-0.380019	-0.284214	-0.450385	0.814026	1.64689	0.86233	1.25488	-0.474772	-0.213473	-0.250831	-0.465479	-0.773498	-0.479405	-0.867417	-1.37262	-1.87517	-1.61485	7.98246e-05	ENSMUST00000098422	ENSEMBL	cdna:pseudogene chromosome:NCBIM37:7:58206314:58206988:-1 gene:ENSMUSG00000074100	FALSE	---	---	---	---	---	---	---	---
10563802	874	---	1.25589	0.970309	1.17174	1.32868	1.24906	-0.451559	-0.0370794	-0.563032	-0.380019	-0.284214	-0.450385	0.814026	1.64689	0.86233	1.25488	-0.474772	-0.213473	-0.250831	-0.465479	-0.773498	-0.479405	-0.867417	-1.37262	-1.87517	-1.61485	7.98246e-05	ENSMUST00000098422	ENSEMBL	cdna:pseudogene chromosome:NCBIM37:7:58206314:58206988:-1 gene:ENSMUSG00000074100	FALSE	---	---	---	---	---	---	---	---
10563804	873	---	1.25589	0.970309	1.17174	1.32868	1.24906	-0.451559	-0.0370794	-0.563032	-0.380019	-0.284214	-0.450385	0.814026	1.64689	0.86233	1.25488	-0.474772	-0.213473	-0.250831	-0.465479	-0.773498	-0.479405	-0.867417	-1.37262	-1.87517	-1.61485	7.98246e-05	ENSMUST00000098422	ENSEMBL	cdna:pseudogene chromosome:NCBIM37:7:58206314:58206988:-1 gene:ENSMUSG00000074100	FALSE	---	---	---	---	---	---	---	---
10466521	527	Gcnt1	0.256433	0.124416	0.545461	-0.0978659	-0.252337	-1.0894	-1.09191	-0.91412	-1.05613	-1.2303	0.458487	0.331059	0.518601	-0.436619	0.523185	-0.736837	-0.899381	-0.37318	-0.541676	-1.62467	1.74358	1.35646	1.16458	2.1471	1.17505	7.98246e-05	NM_173442	RefSeq	Mus musculus glucosaminyl (N-acetyl) transferase 1, core 2 (Gcnt1), transcript variant 1, mRNA.	FALSE	---	---	GO:0005794 // GO:0016020 // GO:0016021	Golgi apparatus // membrane // integral to membrane	GO:0003829 // GO:0008375 // GO:0016740 // GO:0016757	beta-1,3-galactosyl-O-glycosyl-glycoprotein beta-1,6-N-acetylglucosaminyltransferase activity // acetylglucosaminyltransferase activity // transferase activity // transferase activity, transferring glycosyl groups	---	---
10387699	210	Centb1	0.171344	-0.25761	1.07768	0.913249	0.912118	-0.386494	-0.757324	-1.41678	-1.13875	-1.90655	1.50061	-0.063873	0.934573	1.14704	0.575015	-0.605285	-0.809354	-0.743249	-1.28823	-0.996973	-0.0862042	0.57781	1.07178	-0.129052	1.70451	7.98246e-05	NM_153788	RefSeq	Mus musculus centaurin, beta 1 (Centb1), mRNA.	FALSE	GO:0006629 // GO:0007165 // GO:0007242 // GO:0008150 // GO:0016042 // GO:0032312	lipid metabolic process // signal transduction // intracellular signaling cascade // biological_process // lipid catabolic process // regulation of ARF GTPase activity	GO:0005575 // GO:0005737	cellular_component // cytoplasm	GO:0000166 // GO:0003674 // GO:0004629 // GO:0004871 // GO:0004872 // GO:0005515 // GO:0005524 // GO:0008060 // GO:0008270 // GO:0016301 // GO:0016740 // GO:0016787 // GO:0046872	nucleotide binding // molecular_function // phospholipase C activity // signal transducer activity // receptor activity // protein binding // ATP binding // ARF GTPase activator activity // zinc ion binding // kinase activity // transferase activity // hydrolase activity // metal ion binding	---	---
10548785	134	Dynlt1	0.189417	0.327937	0.94712	0.400975	0.441082	-0.712031	-0.508753	-0.149798	-1.63319	-1.35788	0.907516	0.172134	1.14193	0.641873	0.879245	-0.870793	-2.21416	-0.784218	-1.19213	-1.05263	1.74081	0.960185	0.211455	0.842097	0.671812	7.98246e-05	NM_009342	RefSeq	Mus musculus dynein light chain Tctex-type 1 (Dynlt1), mRNA.	FALSE	GO:0007017	microtubule-based process	GO:0005794 // GO:0005858 // GO:0005868 // GO:0005868 // GO:0005874 // GO:0030286	Golgi apparatus // axonemal dynein complex // cytoplasmic dynein complex // cytoplasmic dynein complex // microtubule // dynein complex	GO:0003774 // GO:0005515	motor activity // protein binding	---	---
10606948	1012	Morc4	0.761983	-0.0932974	1.35893	0.973415	0.773235	-1.20594	-0.215127	-0.211913	-0.995416	-0.747515	0.582625	0.726791	2.01807	1.48926	1.1562	-0.911784	-1.70821	-0.367706	-0.698946	-1.07829	-0.801195	-0.85058	0.887602	-0.859748	0.0175686	8.13638e-05	NM_029413	RefSeq	Mus musculus microrchidia 4 (Morc4), mRNA.	FALSE	---	---	---	---	GO:0005524 // GO:0008270 // GO:0046872	ATP binding // zinc ion binding // metal ion binding	---	---
10407122	2017	---	-0.128954	-0.934874	-0.81907	-0.582945	-0.735213	1.49886	1.38306	1.78665	0.998397	1.25817	-0.738296	-0.395534	-0.534197	-0.538159	-0.891372	0.152799	1.54211	1.23543	-0.483461	1.24428	-0.749928	-1.01761	-0.969213	-0.618561	-0.962368	8.15396e-05	ENSMUST00000099180	ENSEMBL	cdna:pseudogene chromosome:NCBIM37:13:110478437:110478830:1 gene:ENSMUSG00000074662	FALSE	---	---	---	---	---	---	---	---
10380599	351	Ttll6	0.437762	0.945071	0.75934	0.111161	0.180805	-0.48966	-0.35776	-0.542227	-1.51882	-1.7827	1.18558	0.367515	1.3378	1.94885	1.09417	-0.407252	-1.47674	-0.708871	-0.929674	-1.27936	1.3494	0.184176	-0.117678	-0.674699	0.383823	8.18698e-05	NM_172799	RefSeq	Mus musculus tubulin tyrosine ligase-like family, member 6 (Ttll6), mRNA.	FALSE	GO:0006464	protein modification process	GO:0005929 // GO:0042995	cilium // cell projection	GO:0004835 // GO:0016874	tubulin-tyrosine ligase activity // ligase activity	---	---
10431802	1379	Twf1	-1.51684	-0.406047	-1.18239	-1.36031	-0.939645	0.083113	0.0400958	1.55501	0.100366	0.481207	-0.418556	-1.76583	-1.58341	-0.953515	-0.229419	0.607189	1.26931	0.919054	1.41324	1.21159	0.90061	0.350821	0.670966	0.461901	0.29149	8.19887e-05	NM_008971	RefSeq	Mus musculus twinfilin, actin-binding protein, homolog 1 (Drosophila) (Twf1), mRNA.	FALSE	---	---	GO:0005622 // GO:0005737 // GO:0005856 // GO:0015629	intracellular // cytoplasm // cytoskeleton // actin cytoskeleton	GO:0003779 // GO:0004713	actin binding // protein tyrosine kinase activity	---	---
10521709	1687	Lap3	-0.732296	-0.445533	-1.2495	-0.890432	-0.811489	0.951645	0.762267	1.13402	1.80052	1.5711	0.256798	-1.4532	-1.33413	-0.0734543	-0.129189	0.483643	1.32707	0.693758	0.590955	1.28558	-0.169353	-0.651616	-0.906145	-1.09272	-0.9183	8.22851e-05	NM_024434	RefSeq	Mus musculus leucine aminopeptidase 3 (Lap3), mRNA.	FALSE	GO:0006508 // GO:0019538	proteolysis // protein metabolic process	GO:0005622 // GO:0005737 // GO:0005739	intracellular // cytoplasm // mitochondrion	GO:0000287 // GO:0004177 // GO:0008233 // GO:0008235 // GO:0008270 // GO:0016787 // GO:0030145 // GO:0046872	magnesium ion binding // aminopeptidase activity // peptidase activity // metalloexopeptidase activity // zinc ion binding // hydrolase activity // manganese ion binding // metal ion binding	---	---
10542340	1003	8430419L09Rik	0.930176	0.290006	1.06317	0.713058	0.681041	-0.339463	-0.291897	-0.418499	-0.639581	-0.395009	1.31591	0.383033	1.48256	1.38067	2.22789	-0.250557	-0.89633	-0.317437	-0.302701	-1.24765	-0.548496	-0.819409	-1.63651	-1.15509	-1.2089	8.22851e-05	BC137674	GenBank	Mus musculus RIKEN cDNA 8430419L09 gene, mRNA (cDNA clone MGC:169298 IMAGE:8860693), complete cds.	FALSE	---	---	GO:0016020 // GO:0016021	membrane // integral to membrane	---	---	---	---
10424075	1639	---	-0.446398	-0.776869	-0.754174	-0.353613	-0.27422	0.84506	1.01906	0.831433	1.45967	1.25979	-0.349247	-0.691936	-0.414793	0.354548	0.496339	0.549803	1.56616	0.590086	0.77028	1.08992	-0.617532	-1.07042	-1.94978	-1.56347	-1.56968	8.2659e-05	GENSCAN00000042973	ENSEMBL	cdna:Genscan chromosome:NCBIM37:15:50403063:50428329:1	FALSE	---	---	---	---	---	---	---	---
10570344	1461	Lamp1	-0.041377	-0.84835	-0.49091	-0.275162	-0.204901	0.515818	0.53513	0.599061	1.11876	1.10902	0.178194	0.106055	-0.350342	0.354136	-0.95048	1.10322	1.77158	1.10915	1.0748	0.893739	-1.18146	-1.56395	-1.61808	-1.46067	-1.48298	8.2659e-05	NM_010684	RefSeq	Mus musculus lysosomal-associated membrane protein 1 (Lamp1), mRNA.	FALSE	---	---	GO:0005764 // GO:0005764 // GO:0005768 // GO:0005770 // GO:0005770 // GO:0005771 // GO:0005886 // GO:0009897 // GO:0016020 // GO:0016021 // GO:0042383 // GO:0042470	lysosome // lysosome // endosome // late endosome // late endosome // multivesicular body // plasma membrane // external side of plasma membrane // membrane // integral to membrane // sarcolemma // melanosome	GO:0005515	protein binding	---	---
10571840	986	Hpgd	0.789631	0.283991	1.40659	1.04698	1.08601	-1.21354	-0.72374	-1.23534	-0.848556	-1.44998	0.415367	1.06238	1.61341	1.52661	1.07745	-0.130669	-1.42277	0.175418	0.504744	-0.715073	-0.384052	-0.466167	-1.13992	-0.573294	-0.685478	8.3243e-05	NM_008278	RefSeq	Mus musculus hydroxyprostaglandin dehydrogenase 15 (NAD) (Hpgd), mRNA.	FALSE	GO:0006629 // GO:0006631 // GO:0006693 // GO:0008152 // GO:0055114	lipid metabolic process // fatty acid metabolic process // prostaglandin metabolic process // metabolic process // oxidation reduction	GO:0005737	cytoplasm	GO:0003824 // GO:0005488 // GO:0016404 // GO:0016491	catalytic activity // binding // 15-hydroxyprostaglandin dehydrogenase (NAD+) activity // oxidoreductase activity	GenMAPP	Prostaglandin_synthesis_regulation
10408879	2084	Gfod1	-0.56342	-0.777736	-0.740997	-0.935938	-1.32327	0.709918	1.17858	1.83494	1.81078	1.88959	-0.0447212	-1.67121	-1.06319	-0.545334	-0.0932071	0.343269	0.851887	0.733304	0.224865	0.748007	-0.26089	-0.67805	-0.229297	-0.776143	-0.621736	8.39254e-05	NM_001033399	RefSeq	Mus musculus glucose-fructose oxidoreductase domain containing 1 (Gfod1), mRNA.	FALSE	GO:0008152 // GO:0055114	metabolic process // oxidation reduction	GO:0005576	extracellular region	GO:0003824 // GO:0005488 // GO:0009055 // GO:0016491	catalytic activity // binding // electron carrier activity // oxidoreductase activity	---	---
10548565	2003	Magohb	-0.903655	0.257469	-1.01529	-0.921388	-0.810443	1.02574	1.13289	1.54862	1.36369	0.948913	-1.98077	-1.3813	-0.711821	-1.60717	0.189032	0.35741	0.530934	1.19013	0.157065	1.24375	-0.737077	-0.302051	0.238692	0.20123	-0.0145827	8.39254e-05	NM_025564	RefSeq	Mus musculus mago-nashi homolog B (Drosophila) (Magohb), mRNA.	FALSE	---	---	---	---	---	---	---	---
10603843	1549	Syn1	-0.544204	-0.176379	0.0623638	-0.828841	-0.484121	1.0557	0.606611	1.37022	1.3648	1.84037	-0.291817	-0.264017	-0.137272	-0.0431949	-0.060379	0.836174	0.22596	1.12027	0.582646	0.956274	-1.19103	-1.10963	-1.41816	-1.66586	-1.80648	8.39254e-05	NM_013680	RefSeq	Mus musculus synapsin I (Syn1), transcript variant a, mRNA.	FALSE	GO:0007269 // GO:0007269	neurotransmitter secretion // neurotransmitter secretion	GO:0000795 // GO:0005794 // GO:0008021 // GO:0030054 // GO:0030672 // GO:0045202 // GO:0048786	synaptonemal complex // Golgi apparatus // synaptic vesicle // cell junction // synaptic vesicle membrane // synapse // presynaptic active zone	GO:0003779 // GO:0003824 // GO:0005524 // GO:0046983	actin binding // catalytic activity // ATP binding // protein dimerization activity	---	---
10489694	34	Zfp334	0.683752	0.353787	0.652158	0.659319	-0.129847	-1.45975	-0.500079	-0.783505	-1.85412	-1.79213	0.793574	1.71239	0.415703	0.0197938	0.355297	-0.758436	-0.655698	-0.814426	-0.583824	-1.12775	0.692372	0.634438	0.89045	1.88891	0.707625	8.42831e-05	NM_178411	RefSeq	Mus musculus zinc finger protein 334 (Zfp334), mRNA.	FALSE	---	---	---	---	GO:0008270 // GO:0046872	zinc ion binding // metal ion binding	---	---
10407358	2083	Paip1	-0.933631	-0.370069	-0.649569	-1.09627	-1.33117	0.543552	1.21403	1.77796	1.68659	1.66471	-0.51364	-1.05216	-1.16255	-0.827886	-0.180607	-0.115002	1.66898	0.431128	0.207638	1.20966	-0.363937	-0.259597	-0.539815	-0.260924	-0.747407	8.49936e-05	NM_145457	RefSeq	Mus musculus polyadenylate binding protein-interacting protein 1 (Paip1), transcript variant 1, mRNA.	FALSE	GO:0006417 // GO:0008150 // GO:0016070	regulation of translation // biological_process // RNA metabolic process	GO:0005575 // GO:0005737	cellular_component // cytoplasm	GO:0003674 // GO:0005515	molecular_function // protein binding	GenMAPP	Translation_Factors
10566395	942	Dub1a	1.32351	1.17159	0.991833	1.50222	1.24377	-0.645975	-0.345194	-1.02147	-0.274352	-0.370648	-0.677341	1.00043	1.72341	0.709469	1.44523	-0.709826	-0.423477	-0.614375	-0.742817	-0.794059	-0.262475	-0.499927	-1.42292	-1.27022	-1.03639	8.49936e-05	NM_201409	RefSeq	Mus musculus deubiquitinating enzyme 1a (Dub1a), mRNA.	FALSE	GO:0016579	protein deubiquitination	GO:0005575	cellular_component	GO:0004221 // GO:0004843	ubiquitin thiolesterase activity // ubiquitin-specific protease activity	---	---
10395376	2295	Ankmy2	-0.53086	-1.8197	-0.306269	-0.685026	-0.684261	0.852559	0.433837	0.284595	1.7148	2.20964	-0.658838	-0.929227	-0.858873	-1.01794	-0.444965	0.708584	0.542534	1.15746	0.734661	1.64578	0.0466696	-0.918389	-0.0496676	-0.848035	-0.579082	8.549e-05	NM_146033	RefSeq	Mus musculus ankyrin repeat and MYND domain containing 2 (Ankmy2), transcript variant 1, mRNA.	FALSE	---	---	---	---	GO:0008270 // GO:0046872	zinc ion binding // metal ion binding	---	---
10351507	2275	ENSMUSG00000073493	-0.462453	-0.463758	-1.10952	-0.724141	-0.874627	0.635512	0.345793	0.434073	2.08372	2.01172	-0.402739	-1.4198	-0.609452	-0.643364	-0.705029	1.23896	1.58455	1.09037	0.17107	0.921136	-0.300225	-0.439616	-0.43176	-1.11336	-0.817053	8.549e-05	ENSMUST00000097468	ENSEMBL	Putative uncharacterized protein gene:ENSMUSG00000073493	FALSE	---	---	---	---	---	---	---	---
10601760	1502	Hnrnph2	0.0288565	-1.03106	-0.156087	-0.0481082	0.0770962	0.644622	0.916372	0.852876	1.27995	1.0125	-0.340904	0.0742592	-0.560047	0.270419	0.302428	0.765918	0.868443	1.14087	0.789081	1.08315	-1.83873	-1.65816	-1.37207	-1.10591	-1.99578	8.549e-05	NM_019868	RefSeq	Mus musculus heterogeneous nuclear ribonucleoprotein H2 (Hnrnph2), mRNA.	FALSE	---	---	GO:0005634 // GO:0030529	nucleus // ribonucleoprotein complex	GO:0000166 // GO:0003676 // GO:0003723	nucleotide binding // nucleic acid binding // RNA binding	---	---
10379363	168	Atad5	0.311051	0.351596	0.73836	0.385353	1.14369	-1.87457	-0.355765	-0.225537	-1.04375	-1.26122	0.922447	0.424204	0.617291	1.1691	0.252742	-1.29258	-1.53208	-0.265452	-1.81276	-0.868667	1.16702	0.727712	1.15704	0.0695551	1.09523	8.72591e-05	NM_001029856	RefSeq	Mus musculus ATPase family, AAA domain containing 5 (Atad5), mRNA.	FALSE	GO:0006974	response to DNA damage stimulus	GO:0005634	nucleus	GO:0000166 // GO:0005524 // GO:0017111	nucleotide binding // ATP binding // nucleoside-triphosphatase activity	---	---
10546706	1153	Rybp	1.0709	1.10864	1.18271	1.11199	0.792322	-0.370298	-0.0474072	-0.45586	-1.15327	-1.05121	1.17945	-0.432539	1.42571	1.64918	0.923378	-0.707958	-1.72378	-0.51711	-0.583144	-1.71678	0.34978	-0.240245	-0.646678	-0.809599	-0.338187	8.89523e-05	NM_019743	RefSeq	Mus musculus RING1 and YY1 binding protein (Rybp), mRNA.	FALSE	GO:0000122 // GO:0006350 // GO:0006355 // GO:0006915	negative regulation of transcription from RNA polymerase II promoter // transcription // regulation of transcription, DNA-dependent // apoptosis	GO:0005622 // GO:0005634 // GO:0005654 // GO:0005737	intracellular // nucleus // nucleoplasm // cytoplasm	GO:0003677 // GO:0003714 // GO:0005515 // GO:0008270 // GO:0046872	DNA binding // transcription corepressor activity // protein binding // zinc ion binding // metal ion binding	---	---
10589982	789	Azi2	0.889685	1.57481	1.59637	1.04675	0.798261	-1.22986	-0.236141	-0.665173	-1.53198	-1.30339	-0.316793	0.874144	-0.0598902	0.904302	0.702231	-1.85896	-0.339065	-0.914925	-0.610288	-1.30089	1.03469	0.64174	0.265199	0.324192	-0.285023	8.89523e-05	NM_013727	RefSeq	Mus musculus 5-azacytidine induced gene 2 (Azi2), transcript variant 1, mRNA.	FALSE	GO:0007249	I-kappaB kinase/NF-kappaB cascade	GO:0005737	cytoplasm	---	---	---	---
10393408	1707	Tmc6	-0.778293	-0.696247	-0.664356	-0.748308	-1.07178	0.202873	0.356906	1.37723	1.94582	2.33847	-0.386224	-0.299334	-0.731741	-0.546171	-0.999602	0.878756	1.37822	0.684094	0.477618	0.940688	-0.214369	-1.10565	-0.873329	-0.804983	-0.660284	9.10443e-05	NM_145439	RefSeq	Mus musculus transmembrane channel-like gene family 6 (Tmc6), transcript variant 1, mRNA.	FALSE	---	---	GO:0005783 // GO:0016020 // GO:0016021	endoplasmic reticulum // membrane // integral to membrane	---	---	---	---
10466680	1022	ENSMUSG00000055440	1.3894	0.39914	1.3204	1.45509	1.81215	-0.473379	-1.08171	-0.248443	-0.617141	0.554853	0.622035	0.459371	1.25098	0.39252	1.07102	-1.08946	-0.717844	-0.0403274	-0.724221	-0.868082	-0.164324	-0.529747	-1.2005	-1.41368	-1.55811	9.10443e-05	ENSMUST00000069049	ENSEMBL	Putative uncharacterized protein gene:ENSMUSG00000055440	FALSE	---	---	---	---	---	---	---	---
10559261	1458	Cd81	-0.340356	0.249004	0.000364199	-0.159059	-0.523457	0.618643	1.02238	1.37158	0.960909	0.974481	0.429872	0.258395	-0.313413	0.208862	-0.118573	0.611628	0.838049	0.850562	0.81042	0.743822	-1.36306	-1.70381	-2.00238	-1.33294	-2.09192	9.11235e-05	NM_133655	RefSeq	Mus musculus CD81 antigen (Cd81), mRNA.	FALSE	GO:0030307 // GO:0030890	positive regulation of cell growth // positive regulation of B cell proliferation	GO:0016020 // GO:0016021	membrane // integral to membrane	---	---	---	---
10587988	2046	Gk5	-0.709008	-1.29911	-0.525379	-0.546087	-0.361511	-0.0826756	0.523619	1.5057	1.95051	1.67168	-1.36925	-0.727648	-0.97219	-1.95023	-0.645243	0.254673	0.6495	0.764366	0.59052	1.41407	0.583718	0.0811651	0.154988	-0.743211	-0.212964	9.1508e-05	NM_177352	RefSeq	Mus musculus glycerol kinase 5 (putative) (Gk5), mRNA.	FALSE	GO:0005975 // GO:0006071	carbohydrate metabolic process // glycerol metabolic process	---	---	GO:0000166 // GO:0004370 // GO:0005524 // GO:0016301 // GO:0016740 // GO:0016773	nucleotide binding // glycerol kinase activity // ATP binding // kinase activity // transferase activity // phosphotransferase activity, alcohol group as acceptor	---	---
10351056	1764	Ankrd45	-0.258585	-0.127039	-0.631844	-0.470563	-0.735055	0.498901	0.398845	0.525337	1.3667	1.271	-1.36088	-1.12454	-1.18724	-0.423442	-1.08523	0.940383	2.20194	1.19987	0.23671	1.09068	-0.0403962	-0.21377	0.0583201	-2.05704	-0.0730684	9.19119e-05	BC049713	GenBank	Mus musculus ankyrin repeat domain 45, mRNA (cDNA clone MGC:58667 IMAGE:6741553), complete cds.	FALSE	---	---	---	---	---	---	---	---
10438478	1488	Abcc5	0.365207	-0.458277	0.248636	0.103594	0.164801	0.336662	0.881256	0.830674	1.08733	0.950441	0.0756332	-0.124527	0.149935	0.0660417	-0.48654	0.746311	0.914954	0.854879	0.762644	0.849145	-0.963763	-1.15042	-2.12916	-2.77549	-1.29996	9.25896e-05	NM_013790	RefSeq	Mus musculus ATP-binding cassette, sub-family C (CFTR/MRP), member 5 (Abcc5), transcript variant 1, mRNA.	FALSE	GO:0006810	transport	GO:0005624 // GO:0016020 // GO:0016021	membrane fraction // membrane // integral to membrane	GO:0000166 // GO:0005524 // GO:0016887 // GO:0017111 // GO:0042626	nucleotide binding // ATP binding // ATPase activity // nucleoside-triphosphatase activity // ATPase activity, coupled to transmembrane movement of substances	---	---
10453811	465	AK220484	0.568194	-0.160367	1.01731	0.595331	0.779764	-1.044	-1.6284	-0.853962	-0.876053	-1.33151	0.35618	0.47559	0.836661	-0.0279233	0.058074	-0.468958	-1.49444	-0.288236	-0.633663	-1.61826	1.33806	1.9937	0.857614	0.36964	1.17966	9.33367e-05	NM_001083628	RefSeq	Mus musculus cDNA sequence AK220484 (AK220484), mRNA.	FALSE	---	---	---	---	---	---	---	---
10549679	2079	Brsk1	-0.73679	-0.375863	-0.406715	-0.843903	-0.711855	1.34597	1.38032	1.7347	1.6535	1.71543	-0.279446	-1.05533	-0.19211	-0.371722	-0.144987	0.167318	0.596457	0.429079	0.0607885	1.34068	-0.922575	-0.819068	-1.29122	-1.14004	-1.13263	9.34788e-05	NM_001003920	RefSeq	Mus musculus BR serine/threonine kinase 1 (Brsk1), mRNA.	FALSE	GO:0000086 // GO:0006468 // GO:0007095 // GO:0009411 // GO:0018105 // GO:0030010 // GO:0030182	G2/M transition of mitotic cell cycle // protein amino acid phosphorylation // mitotic cell cycle G2/M transition DNA damage checkpoint // response to UV // peptidyl-serine phosphorylation // establishment of cell polarity // neuron differentiation	GO:0005634 // GO:0005737	nucleus // cytoplasm	GO:0000166 // GO:0000287 // GO:0004672 // GO:0004674 // GO:0005524 // GO:0016301 // GO:0016740 // GO:0046872	nucleotide binding // magnesium ion binding // protein kinase activity // protein serine/threonine kinase activity // ATP binding // kinase activity // transferase activity // metal ion binding	---	---
10594315	80	Fem1b	0.404939	0.804332	1.36195	0.620261	0.9906	-0.875939	-0.73398	-1.03195	-1.8625	-1.8374	0.280888	1.48164	1.14454	0.507986	0.49979	-0.469243	-1.919	-0.272822	-0.0832294	-1.23979	0.230026	0.354773	0.419298	0.743616	0.481223	9.36993e-05	NM_010193	RefSeq	Mus musculus feminization 1 homolog b (C. elegans) (Fem1b), mRNA.	FALSE	GO:0006511 // GO:0006915	ubiquitin-dependent protein catabolic process // apoptosis	GO:0005737	cytoplasm	---	---	---	---
10485183	1942	Slc35c1	-1.31888	-1.02152	-1.49592	-1.46461	0.112614	0.987815	1.14542	1.26395	0.756034	1.34252	0.143	-0.569986	-1.00824	-0.599496	0.0819417	1.23628	0.570001	0.268445	1.12512	1.4399	-0.552525	-0.7837	-1.61867	-0.140858	0.101356	9.38258e-05	NM_211358	RefSeq	Mus musculus solute carrier family 35, member C1 (Slc35c1), transcript variant 1, mRNA.	FALSE	GO:0006810 // GO:0008643	transport // carbohydrate transport	GO:0005794 // GO:0016020 // GO:0016021	Golgi apparatus // membrane // integral to membrane	GO:0005351	sugar:hydrogen symporter activity	---	---
10548585	1311	Csda	-0.65259	-0.289307	-0.253826	0.301546	-0.891651	1.58979	0.927221	1.16637	1.09983	1.01305	-1.35399	-0.082725	-0.400645	-1.65907	-1.68079	0.919598	0.263147	0.505022	0.232371	1.18444	-2.13844	-0.396127	0.00997805	0.767414	-0.180604	9.38258e-05	NM_139117	RefSeq	Mus musculus cold shock domain protein A (Csda), mRNA.	FALSE	GO:0001701 // GO:0006350 // GO:0006355 // GO:0007283 // GO:0008584 // GO:0009566 // GO:0043066 // GO:0046622	in utero embryonic development // transcription // regulation of transcription, DNA-dependent // spermatogenesis // male gonad development // fertilization // negative regulation of apoptosis // positive regulation of organ growth	GO:0005634 // GO:0005737	nucleus // cytoplasm	GO:0003676 // GO:0003677 // GO:0003723 // GO:0005515	nucleic acid binding // DNA binding // RNA binding // protein binding	---	---
10417070	1296	Ipo5	0.343114	-0.124699	0.0773983	-0.587196	-0.613776	0.983481	0.662513	1.55282	0.874197	0.379629	-1.20264	-1.13431	-1.53206	-2.16676	-1.61991	-0.177685	-0.262481	0.078967	0.363507	0.427038	-0.466757	0.419108	1.42637	0.64029	1.65984	9.38258e-05	NM_023579	RefSeq	Mus musculus importin 5 (Ipo5), mRNA.	FALSE	GO:0000059 // GO:0006810 // GO:0006886 // GO:0015031	protein import into nucleus, docking // transport // intracellular protein transport // protein transport	GO:0005634 // GO:0005643 // GO:0005737	nucleus // nuclear pore // cytoplasm	GO:0005488 // GO:0005515 // GO:0008565	binding // protein binding // protein transporter activity	---	---
10385248	372	Hmmr	0.354071	0.921505	0.785173	0.208863	0.695767	-1.55816	-0.269818	-0.49073	-0.453462	-1.466	1.54872	0.37523	1.25538	1.49695	1.54987	-1.56657	-0.609478	-0.419427	-1.72519	-0.366407	0.373771	-0.69736	-0.847607	0.735999	0.168922	9.63046e-05	NM_013552	RefSeq	Mus musculus hyaluronan mediated motility receptor (RHAMM) (Hmmr), mRNA.	FALSE	---	---	GO:0005737	cytoplasm	GO:0004872 // GO:0005540	receptor activity // hyaluronic acid binding	---	---
10598409	1734	Tcfe3	-0.248201	-1.18303	-0.185006	0.223306	0.0287262	1.31064	1.10643	1.0233	1.12105	1.05609	-1.02166	0.21887	-0.791476	-0.983227	-2.05343	0.809305	0.792194	0.971125	0.845536	1.28878	-1.58383	-0.80212	-0.310304	-0.88048	-0.752584	9.65487e-05	NM_172472	RefSeq	Mus musculus transcription factor E3 (Tcfe3), transcript variant 1, mRNA.	FALSE	GO:0006350 // GO:0006355 // GO:0045449 // GO:0045670 // GO:0045893	transcription // regulation of transcription, DNA-dependent // regulation of transcription // regulation of osteoclast differentiation // positive regulation of transcription, DNA-dependent	GO:0005634 // GO:0005667	nucleus // transcription factor complex	GO:0003677 // GO:0003700 // GO:0030528	DNA binding // transcription factor activity // transcription regulator activity	GenMAPP	TGF_Beta_Signaling_Pathway
10423805	1666	Atp6v1c1	-0.383004	-0.80479	-0.407218	-0.437511	0.159498	0.428771	0.708517	1.30685	1.71458	1.64665	-0.303174	-0.444815	-0.321563	0.00632008	-0.109809	0.446987	1.28847	0.669206	0.600117	1.25513	-1.27858	-1.4409	-1.77643	-1.06254	-1.46076	9.87614e-05	NM_025494	RefSeq	Mus musculus ATPase, H+ transporting, lysosomal V1 subunit C1 (Atp6v1c1), mRNA.	FALSE	GO:0006810 // GO:0006811 // GO:0015986 // GO:0015992	transport // ion transport // ATP synthesis coupled proton transport // proton transport	GO:0033180	proton-transporting V-type ATPase, V1 domain	GO:0005515 // GO:0008553 // GO:0015078 // GO:0016820	protein binding // hydrogen-exporting ATPase activity, phosphorylative mechanism // hydrogen ion transmembrane transporter activity // hydrolase activity, acting on acid anhydrides, catalyzing transmembrane movement of substances	---	---
10364435	1656	---	-0.329321	-1.22997	-0.724604	-0.283605	-0.510452	0.981039	0.968107	0.822526	1.64631	1.53557	-0.139893	-1.29676	-0.662338	-0.114716	0.360891	0.600082	1.57901	0.74055	0.513343	1.15918	-0.80854	-1.1031	-0.970678	-1.48783	-1.24479	9.89958e-05	XR_030763	RefSeq	PREDICTED: Mus musculus hypothetical protein LOC100045342 (LOC100045342), misc RNA.	TRUE	---	---	---	---	---	---	---	---
10426656	30	Prph	-0.0871802	-0.430795	0.530409	0.436645	0.073985	-0.922886	-0.403977	-1.10224	-1.27419	-1.45973	1.23349	0.856728	0.738039	0.990051	1.88554	-0.589585	-1.28062	-0.908122	-0.318678	-1.5324	0.195319	0.688296	0.537712	1.97972	0.164467	9.9722e-05	NM_013639	RefSeq	Mus musculus peripherin (Prph), mRNA.	FALSE	GO:0045104	intermediate filament cytoskeleton organization	GO:0005882 // GO:0005883 // GO:0030424	intermediate filament // neurofilament // axon	GO:0005198 // GO:0005515	structural molecule activity // protein binding	---	---
10590933	2152	Piwil4	-1.0537	0.777091	-1.68178	-0.961592	-0.670704	0.792307	1.815	1.0597	1.4448	0.609528	-0.325352	-0.79607	-0.823904	-1.24207	-0.950672	0.526783	1.38731	0.843941	0.648908	1.1889	0.0141635	-0.235255	-0.718989	-0.955001	-0.693336	0.000100022	NM_177905	RefSeq	Mus musculus piwi-like homolog 4 (Drosophila) (Piwil4), mRNA.	FALSE	GO:0007275	multicellular organismal development	---	---	---	---	---	---
10458704	1765	Spink3	-0.483281	-0.379674	-0.922372	-0.833373	-0.707543	0.513728	-0.0128489	0.386297	0.727681	1.35359	-0.525889	-0.539834	-1.22632	-0.404797	-1.24533	0.849993	2.39235	1.71767	0.731873	1.59122	-1.04332	-0.52798	0.102706	-0.871737	-0.642816	0.000100022	NM_009258	RefSeq	Mus musculus serine peptidase inhibitor, Kazal type 3 (Spink3), mRNA.	FALSE	---	---	GO:0005576	extracellular region	GO:0004866 // GO:0004867	endopeptidase inhibitor activity // serine-type endopeptidase inhibitor activity	---	---
10520288	1073	Galnt11	0.594226	1.41838	0.604053	0.252412	0.698533	-1.35629	-0.904341	-0.957436	-1.67898	-1.17222	1.38641	-0.240301	0.910562	1.49454	2.00381	-0.8956	0.0908668	-0.202861	-0.641923	-1.35138	0.515968	0.0545999	-0.676758	-0.16685	0.220571	0.000100418	NM_144908	RefSeq	Mus musculus UDP-N-acetyl-alpha-D-galactosamine:polypeptide N-acetylgalactosaminyltransferase 11 (Galnt11), mRNA.	FALSE	---	---	GO:0005794 // GO:0016020 // GO:0016021	Golgi apparatus // membrane // integral to membrane	GO:0004653 // GO:0005509 // GO:0005529 // GO:0016740 // GO:0016757 // GO:0030145	polypeptide N-acetylgalactosaminyltransferase activity // calcium ion binding // sugar binding // transferase activity // transferase activity, transferring glycosyl groups // manganese ion binding	---	---
10550189	879	---	1.27043	0.935073	1.03941	1.39607	1.27409	-0.283419	-0.107737	-0.688912	-0.230096	-0.252096	-0.41544	0.925018	1.47402	0.776102	1.20665	-0.454053	-0.0857687	-0.279638	-0.262403	-0.81916	-0.431185	-0.760044	-1.64753	-1.8127	-1.76668	0.000100418	ENSMUST00000111396	ENSEMBL	cdna:known supercontig:NCBIM37:NT_166308:85307:86524:1 gene:ENSMUSG00000079204	FALSE	---	---	---	---	---	---	---	---
10393125	621	Mrpl38	0.223857	1.44352	0.388493	0.0290892	0.396744	-0.830118	-0.937514	-0.981223	-1.00972	-0.763776	0.7555	0.39027	-0.0278204	0.0346399	0.218261	-0.795699	-1.26904	-0.741402	-0.632203	-2.11543	0.40638	1.41788	1.07165	1.91074	1.41693	0.000100756	NM_024177	RefSeq	Mus musculus mitochondrial ribosomal protein L38 (Mrpl38), nuclear gene encoding mitochondrial protein, mRNA.	FALSE	---	---	GO:0005739 // GO:0005761 // GO:0005840 // GO:0030529	mitochondrion // mitochondrial ribosome // ribosome // ribonucleoprotein complex	---	---	---	---
10595466	2085	Pgm3	-0.799858	-0.287368	-0.868802	-1.16936	-1.07305	1.02506	1.01211	1.79297	1.99022	1.18987	0.0627555	-1.39513	-0.691267	-0.825571	-0.0668239	-0.0759751	0.910026	0.473124	0.758412	1.21853	0.173868	-0.618722	-1.05253	-1.13209	-0.550405	0.000102504	NM_028352	RefSeq	Mus musculus phosphoglucomutase 3 (Pgm3), mRNA.	FALSE	GO:0005975 // GO:0006048 // GO:0007283 // GO:0009790 // GO:0019255 // GO:0030097	carbohydrate metabolic process // UDP-N-acetylglucosamine biosynthetic process // spermatogenesis // embryonic development // glucose 1-phosphate metabolic process // hemopoiesis	---	---	GO:0000287 // GO:0004610 // GO:0004614 // GO:0016853 // GO:0016868 // GO:0046872	magnesium ion binding // phosphoacetylglucosamine mutase activity // phosphoglucomutase activity // isomerase activity // intramolecular transferase activity, phosphotransferases // metal ion binding	---	---
10550193	881	---	1.25971	0.92894	1.03332	1.40075	1.28088	-0.28549	-0.0996105	-0.675312	-0.262106	-0.256293	-0.409987	0.916634	1.48807	0.769228	1.20168	-0.484005	-0.0864199	-0.252666	-0.240592	-0.786365	-0.452334	-0.738513	-1.63497	-1.83926	-1.77527	0.000102646	ENSMUST00000111396	ENSEMBL	cdna:known supercontig:NCBIM37:NT_166308:85307:86524:1 gene:ENSMUSG00000079204	FALSE	---	---	---	---	---	---	---	---
10493177	189	Mef2d	0.1157	0.297186	1.07952	0.122282	1.23987	-0.876679	-1.27628	-1.66016	-1.73359	-0.163753	0.0750485	1.36719	1.37702	1.21303	1.29337	-0.221219	-0.534811	-1.17607	-0.6295	-1.57282	0.0343919	0.576433	-0.246921	1.00475	0.296028	0.000103627	NM_133665	RefSeq	Mus musculus myocyte enhancer factor 2D (Mef2d), mRNA.	FALSE	GO:0001649 // GO:0001958 // GO:0002062 // GO:0006350 // GO:0006355	osteoblast differentiation // endochondral ossification // chondrocyte differentiation // transcription // regulation of transcription, DNA-dependent	GO:0005634 // GO:0005634	nucleus // nucleus	GO:0003677 // GO:0003700 // GO:0016563 // GO:0043565	DNA binding // transcription factor activity // transcription activator activity // sequence-specific DNA binding	---	---
10491136	1077	Tnik	1.27889	1.36457	0.861478	0.703462	1.12354	-0.73503	-1.04357	-1.61428	-0.920545	-0.737393	0.026765	1.61093	0.394641	1.52077	0.998879	-0.195025	-0.115609	0.0849549	-0.285217	-1.10839	0.333241	-0.791861	-0.334588	-0.446627	-1.97398	0.000104487	BC137799	GenBank	Mus musculus TRAF2 and NCK interacting kinase, mRNA (cDNA clone MGC:169423 IMAGE:8860818), complete cds.	FALSE	GO:0006468	protein amino acid phosphorylation	---	---	GO:0000166 // GO:0004672 // GO:0004674 // GO:0005083 // GO:0005524 // GO:0016301 // GO:0016740	nucleotide binding // protein kinase activity // protein serine/threonine kinase activity // small GTPase regulator activity // ATP binding // kinase activity // transferase activity	---	---
10515994	339	Smap2	0.64618	1.07747	1.10037	0.695326	1.11804	-1.9088	-0.803886	-0.420701	-0.649797	-0.773009	1.47312	0.526241	0.877592	0.814624	1.3795	-0.174489	-1.88061	-0.414907	-0.125151	-2.04865	0.247426	-0.229196	-0.0312468	-0.154188	-0.341254	0.000104487	NM_133716	RefSeq	Mus musculus stromal membrane-associated GTPase-activating protein 2 (Smap2), mRNA.	FALSE	GO:0032312	regulation of ARF GTPase activity	GO:0005737	cytoplasm	GO:0005096 // GO:0008060 // GO:0008270 // GO:0046872	GTPase activator activity // ARF GTPase activator activity // zinc ion binding // metal ion binding	---	---
10550208	880	---	1.24916	0.92497	1.03932	1.38936	1.27752	-0.308674	-0.0947232	-0.691554	-0.258129	-0.25231	-0.407309	0.92836	1.48852	0.762809	1.22498	-0.483449	-0.0778656	-0.25781	-0.242599	-0.80462	-0.448013	-0.714079	-1.65656	-1.81707	-1.77023	0.000104631	ENSMUST00000111396	ENSEMBL	cdna:known supercontig:NCBIM37:NT_166308:85307:86524:1 gene:ENSMUSG00000079204	FALSE	---	---	---	---	---	---	---	---
10492864	2219	Sh3d19	-1.05222	-1.72597	-0.214493	-0.708615	-0.689139	1.24804	1.2861	2.03621	1.37509	1.13418	-0.756701	-1.00042	-0.0928728	-0.656022	-0.491907	-0.118881	0.233006	0.981193	0.586466	1.1381	0.302254	-0.321593	-1.6374	-0.118881	-0.735522	0.000105187	NM_001082414	RefSeq	Mus musculus SH3 domain protein D19 (Sh3d19), mRNA.	FALSE	GO:0008150	biological_process	GO:0005575 // GO:0005737	cellular_component // cytoplasm	GO:0003674 // GO:0005515	molecular_function // protein binding	---	---
10484463	758	Serping1	0.306812	0.743259	0.810602	0.517322	0.505222	-1.05243	-0.295671	-0.533206	-1.61337	-1.51465	1.08894	0.212375	2.38415	1.47229	1.80192	-0.336852	-0.740584	0.110855	-1.0014	-0.856148	-0.14238	-0.267606	-0.315646	-0.497444	-0.786374	0.000109794	NM_009776	RefSeq	Mus musculus serine (or cysteine) peptidase inhibitor, clade G, member 1 (Serping1), mRNA.	FALSE	GO:0006955 // GO:0006958 // GO:0007596 // GO:0045087	immune response // complement activation, classical pathway // blood coagulation // innate immune response	GO:0005576 // GO:0005615	extracellular region // extracellular space	GO:0001848 // GO:0004866 // GO:0004867	complement binding // endopeptidase inhibitor activity // serine-type endopeptidase inhibitor activity	---	---
10416230	690	Tnfrsf10b	1.64569	-0.32958	0.867279	0.606992	0.67339	-1.61769	-1.67645	-0.93953	-1.53347	-0.84881	1.32958	1.93034	1.07186	1.26617	-0.156994	-0.468272	-0.359806	-0.585617	-0.564974	-0.37196	-0.184151	-0.17198	-0.305933	0.802313	-0.0783943	0.000109962	NM_020275	RefSeq	Mus musculus tumor necrosis factor receptor superfamily, member 10b (Tnfrsf10b), mRNA.	FALSE	GO:0006915 // GO:0006955 // GO:0007165 // GO:0042981	apoptosis // immune response // signal transduction // regulation of apoptosis	GO:0016020 // GO:0016021	membrane // integral to membrane	GO:0004872 // GO:0004888 // GO:0005515 // GO:0008656 // GO:0045569	receptor activity // transmembrane receptor activity // protein binding // caspase activator activity // TRAIL binding	---	---
10394288	1925	Itsn2	-0.814485	-0.212053	-0.0135351	-1.31923	-1.16568	0.187691	1.00021	2.06235	0.503761	0.94131	-0.63725	-0.983876	-1.39566	-1.22557	-1.32384	0.134722	1.29841	1.51114	0.338331	1.46059	0.502183	-0.627536	0.362201	-0.335838	-0.248335	0.000110336	NM_011365	RefSeq	Mus musculus intersectin 2 (Itsn2), mRNA.	FALSE	GO:0006897 // GO:0035023	endocytosis // regulation of Rho protein signal transduction	GO:0005622 // GO:0005737	intracellular // cytoplasm	GO:0005089 // GO:0005509	Rho guanyl-nucleotide exchange factor activity // calcium ion binding	---	---
10366746	2105	Lrig3	-0.498131	-0.478453	-0.274822	-0.832164	-0.870966	0.289946	0.999329	2.04599	1.343	1.79665	-1.62676	-0.405105	-0.750988	-0.685976	-1.10274	0.164675	0.36086	1.21974	0.179599	1.75619	-0.835278	-0.423244	-0.222376	-0.195655	-0.953309	0.000110967	NM_177152	RefSeq	Mus musculus leucine-rich repeats and immunoglobulin-like domains 3 (Lrig3), mRNA.	FALSE	---	---	GO:0016020 // GO:0016021	membrane // integral to membrane	GO:0005515	protein binding	---	---
10466054	254	Cd6	0.0986439	0.660397	1.31335	0.984893	0.0772516	-1.18246	-1.58764	-0.553078	0.0476027	-0.790664	0.580959	0.362461	0.785782	0.565942	1.67107	-1.36347	-1.34338	-1.47094	-1.48515	-0.45359	1.53475	0.827404	0.654031	-0.183083	0.248909	0.00011172	NM_009852	RefSeq	Mus musculus CD6 antigen (Cd6), transcript variant 2, mRNA.	FALSE	GO:0007155	cell adhesion	GO:0016020 // GO:0016021	membrane // integral to membrane	GO:0005044 // GO:0005515	scavenger receptor activity // protein binding	---	---
10595205	2007	2410127L17Rik	-0.755115	-1.50415	-0.132564	-0.82423	-1.3727	0.219595	0.873408	1.14438	1.15007	1.23841	-1.33689	-1.88254	-0.470999	-0.652524	-0.327815	0.360911	1.27109	1.26527	-0.032057	1.6524	-0.0593428	-0.529697	0.827548	-0.545026	0.422565	0.000112188	NM_026120	RefSeq	Mus musculus RIKEN cDNA 2410127L17 gene (2410127L17Rik), mRNA.	FALSE	---	---	---	---	---	---	---	---
10546346	1275	Chchd4	-0.134482	-0.905441	-0.405766	-0.533778	-0.0608581	0.318087	0.862298	2.15947	1.30566	1.56294	-1.18713	-0.506244	-0.98285	-1.32135	-1.8334	-0.0156193	0.206501	0.50969	-0.156985	0.614785	-1.76489	0.515361	0.933597	0.511508	0.308904	0.000113055	NM_133928	RefSeq	Mus musculus coiled-coil-helix-coiled-coil-helix domain containing 4 (Chchd4), nuclear gene encoding mitochondrial protein, mRNA.	FALSE	GO:0006810 // GO:0008150 // GO:0015031 // GO:0065002	transport // biological_process // protein transport // intracellular protein transmembrane transport	GO:0005575 // GO:0005739	cellular_component // mitochondrion	GO:0003674	molecular_function	---	---
10458033	660	Stard4	-0.211114	0.195402	0.205292	-0.299229	0.0413123	-0.967263	-0.322295	-0.90193	-1.41407	-1.26087	0.264959	-0.00492925	0.0975827	-0.0113349	0.839408	-0.60434	-0.940332	-0.583764	-0.943748	-1.26752	1.45585	1.63293	1.57272	2.12414	1.30315	0.000113055	NM_133774	RefSeq	Mus musculus StAR-related lipid transfer (START) domain containing 4 (Stard4), mRNA.	FALSE	GO:0006694 // GO:0006810 // GO:0006869	steroid biosynthetic process // transport // lipid transport	GO:0005739	mitochondrion	GO:0008289 // GO:0015485 // GO:0017127	lipid binding // cholesterol binding // cholesterol transporter activity	---	---
10470182	283	Bmyc	0.422467	0.678885	0.138614	0.0883666	0.285628	-1.05822	-0.790716	-0.515051	-0.428991	-0.0528788	1.1788	0.725439	0.95023	1.20917	1.5455	-1.00823	-1.62839	-1.30674	-1.70452	-1.48988	-0.104705	0.613899	0.232505	1.84751	0.171329	0.000113433	NM_023326	RefSeq	Mus musculus brain expressed myelocytomatosis oncogene (Bmyc), mRNA.	FALSE	GO:0006355	regulation of transcription, DNA-dependent	GO:0005634 // GO:0005819	nucleus // spindle	GO:0003700 // GO:0005515	transcription factor activity // protein binding	---	---
10407012	2169	Sfrs12ip1	-1.2458	0.0542418	-0.675236	-1.42129	-0.0917311	0.709395	0.785484	2.07275	1.68949	0.728612	-0.737927	-0.828401	-1.664	-1.18688	-0.790995	-0.200674	0.829498	1.02043	0.419098	1.22781	0.771456	0.027329	-0.125882	-0.432136	-0.934643	0.000113586	NM_026075	RefSeq	Mus musculus SFRS12-interacting protein 1 (Sfrs12ip1), mRNA.	FALSE	GO:0006397 // GO:0008380	mRNA processing // RNA splicing	---	---	GO:0003676 // GO:0008270 // GO:0046872	nucleic acid binding // zinc ion binding // metal ion binding	---	---
10548598	2223	---	0.198788	-0.933815	0.0463258	-0.263152	-0.965988	1.75673	1.4785	1.98896	0.744722	0.942439	-1.63561	0.0156744	-1.38639	-1.12704	-1.14201	0.485225	1.36248	0.245029	0.134168	0.7596	-0.454954	-0.579576	-0.634969	-0.596758	-0.43837	0.000115355	ENSMUST00000083102	ENSEMBL	ncrna:snoRNA chromosome:NCBIM37:6:131330291:131330424:-1 gene:ENSMUSG00000065036	FALSE	---	---	---	---	---	---	---	---
10476276	1703	D430028G21Rik	-0.555681	-0.867113	-0.414608	-0.875111	-0.643659	0.826408	0.742329	1.90897	1.56151	1.82388	-0.158255	-0.902786	-0.340508	-0.483098	0.224975	0.595725	0.729992	0.814916	0.148483	1.30791	-0.652846	-0.834896	-1.16116	-1.25435	-1.54103	0.000115355	NM_144888	RefSeq	Mus musculus RIKEN cDNA D430028G21 gene (D430028G21Rik), mRNA.	FALSE	GO:0006955 // GO:0009615 // GO:0042981 // GO:0045087	immune response // response to virus // regulation of apoptosis // innate immune response	GO:0005622 // GO:0005739 // GO:0005741 // GO:0016020 // GO:0016021	intracellular // mitochondrion // mitochondrial outer membrane // membrane // integral to membrane	GO:0005515	protein binding	---	---
10386965	1569	AU040829	-0.780023	-1.13383	-0.35473	-0.167388	0.0472397	0.553063	0.779855	1.47525	0.851245	1.31466	-0.608334	-0.795374	0.137449	-0.178818	-0.707714	1.21214	0.0393563	1.64633	1.44562	1.00017	-0.459228	-1.43411	-1.73091	-1.04602	-1.10589	0.000115355	NM_175003	RefSeq	Mus musculus expressed sequence AU040829 (AU040829), transcript variant 2, mRNA.	FALSE	GO:0007165	signal transduction	GO:0005622 // GO:0005737	intracellular // cytoplasm	GO:0005096 // GO:0005515	GTPase activator activity // protein binding	---	---
10542965	681	Sgce	1.05786	0.53448	1.12199	0.567795	0.846723	-1.35963	-0.613748	-1.27446	-2.31314	-0.959289	1.72733	1.09763	0.787213	1.16144	0.902123	-0.304171	0.261224	0.313358	0.112468	-1.22673	-0.701974	-0.618336	-0.613558	-0.0960818	-0.410519	0.000115355	NM_001130190	RefSeq	Mus musculus sarcoglycan, epsilon (Sgce), transcript variant 3, mRNA.	FALSE	---	---	GO:0005737 // GO:0005856 // GO:0005886 // GO:0005887 // GO:0016012 // GO:0016020 // GO:0016021	cytoplasm // cytoskeleton // plasma membrane // integral to plasma membrane // sarcoglycan complex // membrane // integral to membrane	GO:0005509 // GO:0005515	calcium ion binding // protein binding	---	---
10507699	469	Scmh1	-0.0448822	-0.0241584	0.37517	0.397478	0.251927	-1.00175	-1.24605	-0.486497	-1.27695	-0.355568	-0.0565824	0.0466722	0.351804	0.0421373	0.446964	-0.560355	-0.689675	-0.483074	-0.401737	-1.05711	0.430266	0.587357	3.36951	-0.650911	2.03602	0.000115355	NM_013883	RefSeq	Mus musculus sex comb on midleg homolog 1 (Scmh1), mRNA.	FALSE	GO:0006350 // GO:0006355 // GO:0007275 // GO:0016481 // GO:0045449	transcription // regulation of transcription, DNA-dependent // multicellular organismal development // negative regulation of transcription // regulation of transcription	GO:0005634	nucleus	GO:0005515 // GO:0016564	protein binding // transcription repressor activity	---	---
10553148	410	Ccdc114	0.0576994	2.16735	0.875933	0.587439	0.659755	-0.430988	-0.605914	-1.16194	-1.1278	-1.65638	1.12574	1.14877	0.336867	0.281534	0.234915	-0.896331	-1.91539	-0.687232	-0.769528	-1.0994	0.110029	0.307601	0.613331	1.10904	0.734905	0.000115355	NM_001033243	RefSeq	Mus musculus coiled-coil domain containing 114 (Ccdc114), mRNA.	FALSE	---	---	---	---	---	---	---	---
10441923	1746	2210404J11Rik	0.0109423	-0.0262844	-0.654379	-0.179365	0.080332	1.40273	0.621485	0.0794299	1.63961	1.59132	-1.23513	-0.689598	-1.26496	-1.03494	-1.12166	0.314186	1.75435	1.01816	0.66259	1.1002	-0.976346	-1.33749	-1.00067	-0.632581	-0.12192	0.00011606	NM_001039552	RefSeq	Mus musculus RIKEN cDNA 2210404J11 gene (2210404J11Rik), transcript variant 1, mRNA.	FALSE	---	---	---	---	---	---	---	---
10589913	2239	Dync1li1	-1.08069	-0.374345	-0.330748	-0.785392	-1.26697	0.960291	1.45539	1.93717	1.22019	0.705026	-0.400379	-0.00339258	-0.58281	-1.02376	-0.477774	0.0806186	1.60784	0.731508	0.261333	1.61089	-1.00466	-1.26799	-0.787834	-0.395395	-0.788133	0.000117059	NM_146229	RefSeq	Mus musculus dynein cytoplasmic 1 light intermediate chain 1 (Dync1li1), mRNA.	FALSE	GO:0007018 // GO:0007264	microtubule-based movement // small GTPase mediated signal transduction	GO:0005868 // GO:0005874 // GO:0030286	cytoplasmic dynein complex // microtubule // dynein complex	GO:0000166 // GO:0003774 // GO:0003777 // GO:0005524 // GO:0005525	nucleotide binding // motor activity // microtubule motor activity // ATP binding // GTP binding	---	---
10351298	255	Gpr161	0.535381	1.60351	1.4257	0.319266	-0.344059	-1.27705	-0.965784	-0.85436	-1.59266	-0.88728	0.404737	0.483434	0.82053	1.21979	1.4496	-0.160778	-1.7548	-0.809439	-0.5481	-0.884091	1.54344	0.386655	0.254015	0.045952	-0.413603	0.000117261	NM_001081126	RefSeq	Mus musculus G protein-coupled receptor 161 (Gpr161), mRNA.	FALSE	---	---	---	---	GO:0004872	receptor activity	---	---
10479852	1622	Camk1d	-0.495616	-1.17788	-0.169658	-0.0827477	-0.181022	0.8738	1.21501	0.705854	1.12309	1.78979	-0.104704	-0.720707	-0.939961	-0.00206507	0.196207	0.354529	0.958603	1.13598	0.828356	0.777601	-0.0705278	-0.887989	-1.9828	-1.9916	-1.15156	0.000117405	NM_177343	RefSeq	Mus musculus calcium/calmodulin-dependent protein kinase ID (Camk1d), mRNA.	FALSE	GO:0006468 // GO:0042981	protein amino acid phosphorylation // regulation of apoptosis	GO:0005634 // GO:0005737	nucleus // cytoplasm	GO:0000166 // GO:0003824 // GO:0004672 // GO:0004674 // GO:0004683 // GO:0005509 // GO:0005516 // GO:0005524 // GO:0016301 // GO:0016740	nucleotide binding // catalytic activity // protein kinase activity // protein serine/threonine kinase activity // calmodulin-dependent protein kinase activity // calcium ion binding // calmodulin binding // ATP binding // kinase activity // transferase activity	---	---
10605034	1448	Xlr4c	-0.605209	0.443629	-0.18486	-0.190187	-0.147747	0.248043	0.988952	0.867394	0.934365	1.50002	-1.26694	-0.725124	-0.00981126	-0.528111	-0.550647	0.691163	1.62855	1.05189	1.33639	1.04193	-1.0676	-1.47187	-1.26793	-1.41168	-1.30461	0.000117405	NM_183094	RefSeq	Mus musculus X-linked lymphocyte-regulated 4C (Xlr4c), mRNA.	FALSE	---	---	---	---	---	---	---	---
10483719	199	Chn1	0.526522	-0.709957	1.16782	0.51748	0.2294	-1.41977	-1.4331	-0.997022	-0.780946	-0.995009	0.489358	-0.097338	0.945275	0.775445	1.53903	-0.401954	-1.24972	-1.10851	-0.836937	-1.23867	1.01112	0.832715	1.564	0.751398	0.919362	0.000117405	NM_001113246	RefSeq	Mus musculus chimerin (chimaerin) 1 (Chn1), transcript variant 3, mRNA.	FALSE	GO:0007165 // GO:0007242	signal transduction // intracellular signaling cascade	GO:0005622	intracellular	GO:0005096 // GO:0005515 // GO:0008270 // GO:0019992 // GO:0046872	GTPase activator activity // protein binding // zinc ion binding // diacylglycerol binding // metal ion binding	---	---
10575034	651	Cdh3	0.419752	0.198236	1.09197	0.343949	0.369782	-0.767161	-0.707831	-0.8261	-1.57047	-1.83339	0.792426	0.476169	0.923569	0.717904	0.301666	-0.602803	-1.68578	0.00433225	-0.617303	-1.87547	1.25043	0.597277	0.496017	1.14844	1.35439	0.000117846	NM_001037809	RefSeq	Mus musculus cadherin 3 (Cdh3), transcript variant 1, mRNA.	FALSE	GO:0007155 // GO:0007156 // GO:0016337	cell adhesion // homophilic cell adhesion // cell-cell adhesion	GO:0005886 // GO:0005913 // GO:0016020 // GO:0016021	plasma membrane // cell-cell adherens junction // membrane // integral to membrane	GO:0005509 // GO:0005515	calcium ion binding // protein binding	---	---
10438094	2226	---	-0.186519	-1.45924	-0.504871	-1.38573	-0.00324335	0.759414	0.660893	1.4336	1.75225	2.21356	-1.34104	-0.486153	-0.816697	-0.364105	-1.09344	0.595019	1.31911	0.179906	0.543804	0.700973	-0.686216	-0.132209	-0.212343	-0.884233	-0.602471	0.000119166	mmu-mir-130b // mmu-mir-130b	miRBase Micro RNA Database // miRBase Micro RNA Database	MI0000408 Mus musculus miR-130b stem-loop // MI0000408 Mus musculus miR-130b stem-loop	FALSE // FALSE	---	---	---	---	---	---	---	---
10466248	1205	Stx3	-0.320503	-1.95306	-0.207469	-0.694006	-0.808723	1.28637	1.50296	0.441801	0.748727	0.298828	-1.02002	-0.184529	-1.31803	-1.45574	-1.85116	0.473765	0.623162	1.30098	0.361995	1.3302	-0.661332	0.441801	0.687156	0.496404	0.480412	0.000119166	NM_001025307	RefSeq	Mus musculus syntaxin 3 (Stx3), transcript variant B, mRNA.	FALSE	GO:0006810 // GO:0006836 // GO:0006886 // GO:0016192	transport // neurotransmitter transport // intracellular protein transport // vesicle-mediated transport	GO:0016020 // GO:0016021	membrane // integral to membrane	GO:0005484	SNAP receptor activity	---	---
10361098	213	Nenf	1.04268	0.248997	1.15853	0.784317	0.545198	-0.79767	-0.742575	-0.40673	-1.40022	-2.44677	0.857276	0.352239	1.49404	0.935958	0.407551	-1.08525	0.03727	-0.754213	-0.951513	-1.55814	1.36415	0.164576	0.214695	0.31142	0.22419	0.000119166	NM_025424	RefSeq	Mus musculus neuron derived neurotrophic factor (Nenf), mRNA.	FALSE	GO:0043410	positive regulation of MAPKKK cascade	GO:0005576 // GO:0005615	extracellular region // extracellular space	GO:0005506 // GO:0008083 // GO:0020037 // GO:0046872 // GO:0046914	iron ion binding // growth factor activity // heme binding // metal ion binding // transition metal ion binding	---	---
10420596	81	Tnfrsf19	0.825823	0.266549	1.38026	0.7271	0.670415	-0.846534	-1.47908	-1.37365	-1.18875	-1.7519	0.111304	1.45833	0.583494	-0.0665778	0.487787	-0.0638087	-1.18079	-0.469754	-0.517007	-1.5693	0.038312	1.06331	0.92016	1.2011	0.773201	0.000119166	NM_013869	RefSeq	Mus musculus tumor necrosis factor receptor superfamily, member 19 (Tnfrsf19), mRNA.	FALSE	---	---	GO:0005576 // GO:0005886 // GO:0016020 // GO:0016021	extracellular region // plasma membrane // membrane // integral to membrane	GO:0004872	receptor activity	---	---
10560983	1931	Dedd2	-1.07848	-0.450261	-0.513175	-0.443244	-0.861101	0.558673	0.145513	0.704488	2.19976	1.29323	-0.240607	-0.347408	-1.48016	-1.44309	-1.59373	1.06834	1.3347	0.207349	1.09019	1.44303	-0.352171	-0.601967	-0.295559	-0.511484	0.167173	0.000120331	NM_207677	RefSeq	Mus musculus death effector domain-containing DNA binding protein 2 (Dedd2), mRNA.	FALSE	GO:0006350 // GO:0006355 // GO:0006915 // GO:0042981	transcription // regulation of transcription, DNA-dependent // apoptosis // regulation of apoptosis	GO:0005634	nucleus	GO:0003677 // GO:0005515	DNA binding // protein binding	---	---
10501832	1651	Abcd3	-0.518552	-0.626929	-0.218986	-1.06144	-1.02081	0.269948	0.562942	0.838897	1.42029	1.46136	-0.202365	-0.502758	-0.436245	0.174532	0.489662	0.713573	1.82734	0.907795	0.848138	1.20634	-0.5747	-1.53342	-1.32249	-1.66124	-1.04087	0.000120331	NM_008991	RefSeq	Mus musculus ATP-binding cassette, sub-family D (ALD), member 3 (Abcd3), mRNA.	FALSE	GO:0006810	transport	GO:0005739 // GO:0005743 // GO:0005777 // GO:0005778 // GO:0016020 // GO:0016021	mitochondrion // mitochondrial inner membrane // peroxisome // peroxisomal membrane // membrane // integral to membrane	GO:0000166 // GO:0005515 // GO:0005524 // GO:0016887 // GO:0017111 // GO:0042626	nucleotide binding // protein binding // ATP binding // ATPase activity // nucleoside-triphosphatase activity // ATPase activity, coupled to transmembrane movement of substances	---	---
10529330	1015	Whsc2	1.20937	0.0650667	1.16692	2.10467	1.39833	-0.82074	-0.682352	-1.01026	-0.592754	-0.599267	-0.107456	0.471068	2.01227	0.221757	0.569961	-0.860152	-1.37226	-0.809045	-0.698412	-1.44478	-0.285115	0.0190466	0.853432	-0.771615	-0.0376732	0.000120331	NM_011914	RefSeq	Mus musculus Wolf-Hirschhorn syndrome candidate 2 (human) (Whsc2), mRNA.	FALSE	GO:0006350 // GO:0006355 // GO:0008150	transcription // regulation of transcription, DNA-dependent // biological_process	GO:0005575 // GO:0005634	cellular_component // nucleus	GO:0003674	molecular_function	---	---
10518484	15	Fbxo44	0.420758	0.0777449	1.79246	1.14136	0.649708	-0.694498	-1.02462	-1.72953	-1.47101	-0.929043	1.6303	0.0574545	0.801594	1.44769	0.798111	0.0574545	-1.36716	-0.932419	-0.262628	-1.38808	0.420689	0.300893	-0.359251	0.2888	0.273224	0.00012186	NM_173401	RefSeq	Mus musculus F-box protein 44 (Fbxo44), mRNA.	FALSE	GO:0006511 // GO:0030163	ubiquitin-dependent protein catabolic process // protein catabolic process	---	---	GO:0005515	protein binding	---	---
10409396	33	Uimc1	1.00856	-0.235407	0.566932	0.493639	0.121454	-1.96427	-0.866174	-0.235509	-1.43654	-2.01917	1.16935	1.03417	0.6347	0.302719	0.816071	-0.105603	-0.910633	-0.571372	-0.920424	-0.760638	1.46265	-0.100956	0.408697	1.69221	0.415531	0.000122448	NM_011307	RefSeq	Mus musculus ubiquitin interaction motif containing 1 (Uimc1), mRNA.	FALSE	GO:0006350 // GO:0006355 // GO:0016481	transcription // regulation of transcription, DNA-dependent // negative regulation of transcription	GO:0005634	nucleus	---	---	---	---
10547471	2312	B4galnt3	-0.929952	-1.85613	-0.154852	-0.269254	-0.220602	0.718278	0.993221	1.19525	1.7198	1.4563	-0.790218	-0.100007	-0.267787	-1.1109	-1.71621	0.480093	0.763627	0.872706	0.469578	1.56295	-0.37081	-0.855113	-0.300075	-1.20192	-0.0879726	0.000125695	NM_198884	RefSeq	Mus musculus beta-1,4-N-acetyl-galactosaminyl transferase 3 (B4galnt3), mRNA.	FALSE	---	---	GO:0005794 // GO:0016020 // GO:0016021	Golgi apparatus // membrane // integral to membrane	GO:0016740 // GO:0033842	transferase activity // N-acetyl-beta-glucosaminyl-glycoprotein 4-beta-N-acetylgalactosaminyltransferase activity	---	---
10608706	1733	---	0.205474	-0.799605	0.145081	0.191117	0.298599	1.19478	1.12276	1.07819	1.14774	1.31631	-1.02734	-0.599923	-1.05325	-0.545764	-2.30777	0.638096	0.301903	1.01628	1.12162	0.749772	-1.50528	-0.756292	-0.689952	-1.20678	-0.0357542	0.000125777	NM_001081962.1	---	Mus musculus mSin3A-binding protein (Sap25), mRNA	---	---	---	---	---	---	---	---	---
10560530	1374	Bloc1s3	-0.794586	-0.917243	-1.57306	-2.01762	-0.723082	0.195003	0.693556	1.94533	0.068315	0.636576	-0.644492	-0.40128	-1.31615	-1.16182	-0.665869	0.472686	0.726571	0.409934	1.47595	0.411618	0.724615	0.157203	-0.0730395	1.26024	1.11063	0.000125777	NM_177692	RefSeq	Mus musculus biogenesis of lysosome-related organelles complex-1, subunit 3 (Bloc1s3), mRNA.	FALSE	GO:0007596 // GO:0032438 // GO:0032816 // GO:0033299 // GO:0042493 // GO:0043473 // GO:0048066 // GO:0060155	blood coagulation // melanosome organization // positive regulation of natural killer cell activation // secretion of lysosomal enzymes // response to drug // pigmentation // pigmentation during development // platelet dense granule organization	GO:0005737 // GO:0005829	cytoplasm // cytosol	GO:0005515	protein binding	---	---
10456492	1920	D18Ertd653e	-0.561809	0.314313	-1.45634	-1.60835	-0.670631	0.827565	0.0644449	1.15349	1.16129	0.54266	-1.21438	-0.490855	-1.35658	-1.37015	-0.844727	0.114138	1.57473	1.62476	0.889393	1.37672	0.271569	0.0135126	0.447273	-0.720384	-0.0816645	0.000126277	BC096371	GenBank	Mus musculus DNA segment, Chr 18, ERATO Doi 653, expressed, mRNA (cDNA clone MGC:106263 IMAGE:3583946), complete cds.	FALSE	---	---	GO:0005886 // GO:0016020 // GO:0016021	plasma membrane // membrane // integral to membrane	---	---	---	---
10541067	902	Eif4a3	1.46223	0.220823	0.914829	1.83055	1.44644	-0.238729	-0.407752	-1.0055	-0.115064	-0.0892107	-0.0871653	1.10391	1.76627	1.05995	0.736239	-0.535608	-0.428424	-0.698764	-0.580182	-0.976567	-1.27849	-0.762333	-0.889579	-1.1401	-1.30778	0.000126277	NM_138669	RefSeq	Mus musculus eukaryotic translation initiation factor 4A, isoform 3 (Eif4a3), mRNA.	FALSE	GO:0000184 // GO:0006364 // GO:0006397 // GO:0008380	nuclear-transcribed mRNA catabolic process, nonsense-mediated decay // rRNA processing // mRNA processing // RNA splicing	GO:0005634 // GO:0005681	nucleus // spliceosome	GO:0000166 // GO:0003676 // GO:0003723 // GO:0003743 // GO:0004386 // GO:0005524 // GO:0008026 // GO:0016787	nucleotide binding // nucleic acid binding // RNA binding // translation initiation factor activity // helicase activity // ATP binding // ATP-dependent helicase activity // hydrolase activity	GenMAPP	mRNA_processing_binding_Reactome
10510112	842	OTTMUSG00000010537	1.15382	0.803417	1.04796	1.3117	1.15206	-0.100862	0.0987357	-0.418294	0.00781957	0.027015	-0.249658	0.833993	1.39483	0.758635	0.981877	-0.353677	-0.0780935	-0.0432469	-0.198803	-0.491181	-0.797629	-1.07144	-1.77936	-2.2354	-1.75423	0.000126277	NM_001034101	RefSeq	Mus musculus predicted gene, OTTMUSG00000010537 (OTTMUSG00000010537), mRNA.	FALSE	---	---	---	---	---	---	---	---
10588037	635	Rbp1	0.580858	-0.0548387	0.608096	0.32301	0.209609	-1.1751	-1.09652	-1.67177	-1.62578	-1.02606	0.582644	0.312629	0.0309668	0.203555	0.299329	0.112262	-0.855656	-0.428465	-0.397091	-1.1927	0.176349	1.39464	2.27345	0.528151	1.88843	0.000126277	NM_011254	RefSeq	Mus musculus retinol binding protein 1, cellular (Rbp1), mRNA.	FALSE	GO:0006810 // GO:0042572 // GO:0042572 // GO:0042573 // GO:0042573	transport // retinol metabolic process // retinol metabolic process // retinoic acid metabolic process // retinoic acid metabolic process	GO:0005737	cytoplasm	GO:0005215 // GO:0005488 // GO:0005501 // GO:0008289 // GO:0016918 // GO:0019841	transporter activity // binding // retinoid binding // lipid binding // retinal binding // retinol binding	---	---
10502205	259	Hadh	0.493304	0.544861	1.10817	0.933396	0.850422	-1.13811	-0.579914	-0.285977	-1.13225	-0.723721	0.977214	0.076217	1.07838	0.856934	2.09646	-0.539296	-2.25131	-0.814059	-0.358258	-1.60615	0.943185	0.127614	-0.283284	0.0119134	-0.385738	0.000127941	NM_008212	RefSeq	Mus musculus hydroxyacyl-Coenzyme A dehydrogenase (Hadh), nuclear gene encoding mitochondrial protein, mRNA.	FALSE	GO:0006629 // GO:0006631 // GO:0008152 // GO:0055114	lipid metabolic process // fatty acid metabolic process // metabolic process // oxidation reduction	GO:0005739 // GO:0005743	mitochondrion // mitochondrial inner membrane	GO:0003824 // GO:0003857 // GO:0005488 // GO:0016491 // GO:0050662	catalytic activity // 3-hydroxyacyl-CoA dehydrogenase activity // binding // oxidoreductase activity // coenzyme binding	GenMAPP // GenMAPP // GenMAPP	Fatty_Acid_Degradation // Fatty_Acid_Synthesis // Mitochondrial_fatty_acid_betaoxidation
10427704	1882	Dnajc21	-0.159559	0.724331	-0.665139	-0.269197	-0.0833787	0.885659	0.625959	1.1742	1.68561	1.27018	-1.32777	-2.08894	-1.64607	-1.3571	-0.569137	-0.0127663	0.912715	0.660998	0.713808	1.25349	-0.155776	-0.0880025	0.0566452	-1.18483	-0.355932	0.000130288	NM_030046	RefSeq	Mus musculus DnaJ (Hsp40) homolog, subfamily C, member 21 (Dnajc21), mRNA.	FALSE	---	---	---	---	---	---	---	---
10599576	462	2700038C09Rik	0.79084	0.503279	0.781042	1.27216	1.25476	-1.36582	-0.955539	-1.25244	-1.49538	-1.13224	0.742835	-0.137424	0.281622	0.236347	-0.312778	-0.618887	-1.49163	-0.647214	-0.0910975	-1.36825	1.28553	0.986371	1.18166	0.268399	1.28388	0.000130288	BC100439	GenBank	Mus musculus RIKEN cDNA 2700038C09 gene, mRNA (cDNA clone MGC:118251 IMAGE:6531448), complete cds.	FALSE	---	---	---	---	---	---	---	---
10447904	2277	Unc93a	-0.632966	-0.205387	-0.945656	-1.09402	-0.649107	0.630103	0.509179	0.949183	1.60282	2.12245	-0.446822	-0.908063	-0.28253	-0.450919	-0.205387	1.20251	0.571397	0.392841	0.554679	1.94746	-0.697632	-0.654861	-0.989178	-1.63518	-0.684917	0.000132012	BC128471	GenBank	Mus musculus unc-93 homolog A (C. elegans), mRNA (cDNA clone IMAGE:40090632), complete cds.	FALSE	GO:0008150	biological_process	GO:0005575 // GO:0005886 // GO:0016020 // GO:0016021	cellular_component // plasma membrane // membrane // integral to membrane	GO:0003674	molecular_function	---	---
10460787	2058	Atg2a	-0.434275	-1.11514	-0.9937	-0.947323	-0.308303	0.611559	0.229739	0.318735	1.78536	2.23029	-0.103781	-0.487545	-0.826171	-0.726576	-0.611013	1.17025	1.21982	0.926843	0.667909	0.624962	0.421394	-0.331259	-0.984402	-2.04174	-0.295635	0.000132012	NM_194348	RefSeq	Mus musculus ATG2 autophagy related 2 homolog A (S. cerevisiae) (Atg2a), mRNA.	FALSE	---	---	---	---	---	---	---	---
10417144	1586	Timm8a2	0.27546	-0.838691	-0.678713	-0.472662	-0.874251	0.812908	0.916416	1.83391	1.89636	1.26572	-1.29909	-0.0919773	-0.0919773	-0.385048	-0.400143	0.578697	0.395146	1.03711	0.437808	1.22853	-1.13329	-1.20178	-0.726184	-1.0324	-1.45187	0.000132012	NM_001037744	RefSeq	Mus musculus translocase of inner mitochondrial membrane 8 homolog a2 (yeast) (Timm8a2), nuclear gene encoding mitochondrial protein, mRNA.	FALSE	GO:0006626 // GO:0006810 // GO:0015031 // GO:0045039 // GO:0065002	protein targeting to mitochondrion // transport // protein transport // protein import into mitochondrial inner membrane // intracellular protein transmembrane transport	GO:0005739 // GO:0005743 // GO:0016020 // GO:0042719	mitochondrion // mitochondrial inner membrane // membrane // mitochondrial intermembrane space protein transporter complex	GO:0008270 // GO:0046872	zinc ion binding // metal ion binding	---	---
10426875	1894	Atf1	0.239757	-0.545813	-0.185231	-0.292888	-0.29877	1.03129	1.29353	0.217697	1.95986	1.59765	-1.44855	-0.701411	-1.35242	-0.776992	-2.26428	0.522595	0.273323	0.931251	1.20931	0.0462015	0.0462015	-0.824374	0.402759	-0.537554	-0.543149	0.000133393	NM_007497	RefSeq	Mus musculus activating transcription factor 1 (Atf1), mRNA.	FALSE	GO:0006350 // GO:0006355	transcription // regulation of transcription, DNA-dependent	GO:0005634 // GO:0005667	nucleus // transcription factor complex	GO:0003677 // GO:0003700 // GO:0005515 // GO:0043565 // GO:0046983	DNA binding // transcription factor activity // protein binding // sequence-specific DNA binding // protein dimerization activity	---	---
10547274	418	Zfp248	0.455398	0.94888	0.181472	0.246541	-0.225136	-1.88454	-0.861116	-1.61153	-1.61035	-1.34108	1.67369	1.49729	0.0644177	0.675958	0.337997	-0.014634	-0.628289	-0.131485	-1.01229	-0.821059	0.240033	0.824669	1.073	0.969025	0.953138	0.000133727	NM_028335	RefSeq	Mus musculus zinc finger protein 248 (Zfp248), mRNA.	FALSE	---	---	GO:0005634	nucleus	GO:0008270 // GO:0046872	zinc ion binding // metal ion binding	---	---
10461921	2008	2410127L17Rik	-0.736619	-1.42783	-0.0852256	-0.787207	-1.28797	-0.0667737	0.845438	1.26227	1.14645	1.23317	-1.37755	-1.80521	-0.42781	-0.823705	-0.396018	0.397771	1.27675	1.2981	0.0710666	1.74283	-0.212555	-0.45019	0.795494	-0.537819	0.353154	0.000135272	NM_026120	RefSeq	Mus musculus RIKEN cDNA 2410127L17 gene (2410127L17Rik), mRNA.	FALSE	---	---	---	---	---	---	---	---
10531304	1924	Cdkl2	-1.44716	-0.647458	-0.791848	-0.343384	-1.24422	0.476793	0.870768	1.71163	0.741491	1.21881	-0.0653489	-0.192375	-1.77326	-0.801033	-1.58952	0.33621	1.41961	1.47215	0.0845745	1.01197	-0.0980605	-1.09603	0.581138	0.0766758	0.087891	0.000135731	NM_016912	RefSeq	Mus musculus cyclin-dependent kinase-like 2 (CDC2-related kinase) (Cdkl2), transcript variant 1, mRNA.	FALSE	GO:0006468	protein amino acid phosphorylation	GO:0005634 // GO:0005737	nucleus // cytoplasm	GO:0000166 // GO:0004672 // GO:0004674 // GO:0004693 // GO:0005524 // GO:0016301 // GO:0016740	nucleotide binding // protein kinase activity // protein serine/threonine kinase activity // cyclin-dependent protein kinase activity // ATP binding // kinase activity // transferase activity	---	---
10575777	247	4933407C03Rik	0.574951	1.11946	1.31517	0.815632	0.642348	-1.16332	-1.09019	-1.3694	-1.40864	-1.01052	1.03695	0.120167	1.1838	1.24332	0.340729	-0.0259021	-1.38844	0.0429869	-0.063244	-1.93422	1.32214	0.332882	-0.279532	-0.601006	0.243888	0.000137869	BC158118	GenBank	Mus musculus RIKEN cDNA 4933407C03 gene, mRNA (cDNA clone MGC:190004 IMAGE:9088191), complete cds.	FALSE	---	---	GO:0005634 // GO:0005737	nucleus // cytoplasm	---	---	---	---
10607443	1825	Magea2	-0.586122	-0.19135	-0.723206	-0.282638	-0.444785	0.773027	1.83038	0.028359	1.23806	2.17871	-1.41444	0.0509838	-1.32981	-0.786024	-0.925903	1.16332	1.16955	0.868034	0.228174	0.941524	-0.687565	-0.689507	-0.644015	-0.956049	-0.80871	0.000139357	NM_020016	RefSeq	Mus musculus melanoma antigen, family A, 2 (Magea2), mRNA.	FALSE	---	---	---	---	---	---	---	---
10607467	1476	Sat1	-0.158222	-0.828304	-0.508348	-0.206031	-0.13319	0.32425	0.572707	1.15925	1.32295	0.849208	-1.25579	0.12027	-0.540835	-0.574447	-0.136982	1.29896	1.59485	0.843915	0.385949	1.71176	-1.73249	-1.33006	-1.19771	-0.0797862	-1.50187	0.000140969	NM_009121	RefSeq	Mus musculus spermidine/spermine N1-acetyl transferase 1 (Sat1), mRNA.	FALSE	GO:0008152 // GO:0042127 // GO:0046208	metabolic process // regulation of cell proliferation // spermine catabolic process	GO:0005737	cytoplasm	GO:0004145 // GO:0008080 // GO:0008415 // GO:0016740	diamine N-acetyltransferase activity // N-acetyltransferase activity // acyltransferase activity // transferase activity	GenMAPP	Nucleotide_Metabolism
10569319	1462	Ctsd	-0.320818	-0.18387	-0.405617	-0.294571	-0.510338	0.180434	0.380009	0.886287	1.06901	1.00326	-0.0556002	0.389745	-0.57831	0.0457878	-0.814505	1.29824	1.96528	0.656233	1.09679	1.28287	-1.37133	-1.51323	-1.50963	-1.05333	-1.6428	0.000140969	NM_009983	RefSeq	Mus musculus cathepsin D (Ctsd), mRNA.	FALSE	GO:0000045 // GO:0006508	autophagic vacuole formation // proteolysis	GO:0005739 // GO:0005764	mitochondrion // lysosome	GO:0004190 // GO:0008233 // GO:0016787	aspartic-type endopeptidase activity // peptidase activity // hydrolase activity	---	---
10376455	27	Hist3h2a	0.211259	1.68316	0.395115	0.259832	0.225461	-1.09391	-0.278049	-0.562753	-1.68213	-1.40267	0.900985	0.776097	0.579863	0.477464	1.69969	-0.0804184	-1.34992	-0.941058	-1.02078	-1.16254	0.914502	-0.0290309	-0.587989	1.79689	0.270938	0.000141119	NM_178218	RefSeq	Mus musculus histone cluster 3, H2a (Hist3h2a), mRNA.	FALSE	GO:0006334	nucleosome assembly	GO:0000786 // GO:0005634 // GO:0005694	nucleosome // nucleus // chromosome	GO:0003677 // GO:0008270 // GO:0046872	DNA binding // zinc ion binding // metal ion binding	---	---
10458794	573	Ccdc112	0.47923	0.656572	0.902307	0.406999	0.326132	-0.596742	-0.374218	-0.990167	-2.15912	-2.60262	0.817058	0.609103	0.889372	0.639544	0.990308	-1.03405	-0.801612	-0.160963	-0.444093	-0.967091	0.668108	0.140774	0.48737	1.4496	0.668197	0.000141334	BC119623	GenBank	Mus musculus coiled-coil domain containing 112, mRNA (cDNA clone IMAGE:40062367), partial cds.	FALSE	---	---	---	---	---	---	---	---
10539177	901	Eif4a3	1.57041	0.175194	0.77295	1.88172	1.32645	-0.274955	-0.45257	-1.07165	-0.153968	-0.064719	0.0549428	1.1175	1.84184	1.07185	0.673465	-0.488653	-0.525177	-0.768772	-0.536554	-0.926468	-1.33056	-0.76277	-0.918294	-1.03519	-1.17603	0.000141409	NM_138669	RefSeq	Mus musculus eukaryotic translation initiation factor 4A, isoform 3 (Eif4a3), mRNA.	FALSE	GO:0000184 // GO:0006364 // GO:0006397 // GO:0008380	nuclear-transcribed mRNA catabolic process, nonsense-mediated decay // rRNA processing // mRNA processing // RNA splicing	GO:0005634 // GO:0005681	nucleus // spliceosome	GO:0000166 // GO:0003676 // GO:0003723 // GO:0003743 // GO:0004386 // GO:0005524 // GO:0008026 // GO:0016787	nucleotide binding // nucleic acid binding // RNA binding // translation initiation factor activity // helicase activity // ATP binding // ATP-dependent helicase activity // hydrolase activity	GenMAPP	mRNA_processing_binding_Reactome
10481518	1145	Ptges	0.522097	1.73541	0.603959	0.381426	0.388531	-0.443217	-1.15504	-0.162458	-1.15375	-0.466324	1.82766	0.251123	0.949376	1.58	1.74578	-0.294574	-1.0852	-1.08039	-0.306817	-1.19312	0.278581	-0.536873	-1.17756	-0.0264121	-1.18221	0.000141645	NM_022415	RefSeq	Mus musculus prostaglandin E synthase (Ptges), mRNA.	FALSE	GO:0006693 // GO:0008285	prostaglandin metabolic process // negative regulation of cell proliferation	GO:0005634 // GO:0005641 // GO:0005737 // GO:0005792 // GO:0016020 // GO:0016021	nucleus // nuclear envelope lumen // cytoplasm // microsome // membrane // integral to membrane	GO:0004667 // GO:0016853 // GO:0050220	prostaglandin-D synthase activity // isomerase activity // prostaglandin-E synthase activity	GenMAPP	Eicosanoid_Synthesis
10556321	99	Ctr9	1.09487	0.788275	1.08781	1.30038	0.908358	-1.24644	-1.13675	-1.56755	-1.0743	-0.496909	0.0721061	1.29702	1.02546	0.345355	-0.320767	-0.396379	-1.31125	-0.630177	-0.109508	-1.803	0.528788	1.20656	1.02487	-0.693918	0.107092	0.000141645	NM_009431	RefSeq	Mus musculus Ctr9, Paf1/RNA polymerase II complex component, homolog (S. cerevisiae) (Ctr9), mRNA.	FALSE	GO:0008150	biological_process	GO:0005634	nucleus	GO:0005488 // GO:0005515 // GO:0042169	binding // protein binding // SH2 domain binding	---	---
10510142	2140	Vmn2r-ps14	-1.03207	-0.156151	-1.1228	-0.986048	-1.19257	0.187951	0.290444	1.39022	1.69032	1.72987	-0.601423	-1.17906	-1.55658	-0.867263	-0.582832	0.0238379	1.45616	0.514159	0.311959	1.81572	-0.122172	0.448918	-0.268113	-0.0848516	-0.10762	0.000142073	NR_002888	RefSeq	Mus musculus vomeronasal 2, receptor, pseudogene 14 (Vmn2r-ps14), non-coding RNA.	FALSE	---	---	---	---	---	---	---	---
10552288	698	Vstm2b	1.06647	0.316797	0.666219	0.00858756	2.08884	-0.709034	-1.22541	-0.85205	-0.359125	-1.04684	1.31566	0.826546	1.86577	1.15602	0.119986	-1.21729	-1.10882	-0.908733	-0.375571	-0.333665	-1.02355	0.392216	0.79243	-0.533047	-0.922413	0.000144025	NM_021387	RefSeq	Mus musculus V-set and transmembrane domain containing 2B (Vstm2b), mRNA.	FALSE	---	---	GO:0016020 // GO:0016021	membrane // integral to membrane	---	---	---	---
10506332	882	OTTMUSG00000008450	1.5042	0.780064	1.12171	1.58766	1.12659	-0.560033	-0.0690874	-0.650569	-0.332823	-0.299908	-0.390154	0.751318	1.72241	0.61158	1.29315	-0.512937	-0.371937	-0.334056	-0.205881	-0.91303	-0.527768	-0.66743	-1.41218	-1.71853	-1.53235	0.000144806	NM_001085516	RefSeq	Mus musculus expressed sequence AA416372 (AA416372), mRNA.	FALSE	---	---	---	---	---	---	---	---
10607587	1548	Pdha1	-0.361594	-0.895185	-0.00825894	-0.174953	-0.300591	0.672023	0.657552	1.92647	1.45045	1.75648	-1.14533	-0.230366	-0.201312	-0.279821	-0.190331	0.404745	0.55189	0.665412	0.675002	1.36277	-1.41047	-1.25729	-0.933716	-1.7135	-1.02008	0.00014705	NM_008810	RefSeq	Mus musculus pyruvate dehydrogenase E1 alpha 1 (Pdha1), nuclear gene encoding mitochondrial protein, mRNA.	FALSE	GO:0006096 // GO:0008152 // GO:0055114	glycolysis // metabolic process // oxidation reduction	GO:0005739 // GO:0043231	mitochondrion // intracellular membrane-bounded organelle	GO:0004738 // GO:0004739 // GO:0016491 // GO:0016624	pyruvate dehydrogenase activity // pyruvate dehydrogenase (acetyl-transferring) activity // oxidoreductase activity // oxidoreductase activity, acting on the aldehyde or oxo group of donors, disulfide as acceptor	---	---
10560655	10	Bcam	0.477715	0.60506	0.810189	0.680152	0.92823	-1.06988	-1.09457	-1.9679	-2.13514	-1.29012	1.18448	0.444883	0.985702	0.461798	0.90763	-0.0873121	-0.639307	0.0377796	0.199294	-1.75987	-0.0861227	0.647639	1.02137	0.169596	0.568711	0.00014705	NM_020486	RefSeq	Mus musculus basal cell adhesion molecule (Bcam), mRNA.	FALSE	GO:0007155	cell adhesion	GO:0005886 // GO:0005887 // GO:0016020 // GO:0016021	plasma membrane // integral to plasma membrane // membrane // integral to membrane	GO:0005055	laminin receptor activity	---	---
10465895	78	Fads2	0.71068	0.120178	1.01536	0.950313	1.01612	-0.776794	-0.652247	-1.57357	-2.15112	-1.36369	0.411466	1.17627	0.807229	0.72511	0.472575	0.0764186	-1.543	-0.375267	-0.229436	-1.73303	0.406607	0.716535	0.511988	0.974601	0.306714	0.000150002	NM_019699	RefSeq	Mus musculus fatty acid desaturase 2 (Fads2), mRNA.	FALSE	GO:0006629 // GO:0006633 // GO:0006810 // GO:0008610 // GO:0022900 // GO:0055114	lipid metabolic process // fatty acid biosynthetic process // transport // lipid biosynthetic process // electron transport chain // oxidation reduction	GO:0005624 // GO:0005783 // GO:0016020 // GO:0016021	membrane fraction // endoplasmic reticulum // membrane // integral to membrane	GO:0004768 // GO:0005506 // GO:0016491 // GO:0016717 // GO:0020037 // GO:0046914	stearoyl-CoA 9-desaturase activity // iron ion binding // oxidoreductase activity // oxidoreductase activity, acting on paired donors, with oxidation of a pair of donors resulting in the reduction of molecular oxygen to two molecules of water // heme binding // transition metal ion binding	---	---
10416334	1303	Dok2	0.0962658	-1.92293	-0.846027	-0.538892	-0.434298	0.689289	0.94172	0.773954	0.700759	1.45449	-0.980094	-0.846488	-0.975249	-1.06969	-1.63729	-0.18435	1.58583	0.0962658	0.797553	0.6419	-1.03759	0.843153	0.883134	-0.362698	1.33128	0.000151068	NM_010071	RefSeq	Mus musculus docking protein 2 (Dok2), mRNA.	FALSE	GO:0000165 // GO:0007169 // GO:0007265	MAPKKK cascade // transmembrane receptor protein tyrosine kinase signaling pathway // Ras protein signal transduction	GO:0005575	cellular_component	GO:0005066 // GO:0005069 // GO:0005158	transmembrane receptor protein tyrosine kinase signaling protein activity // transmembrane receptor protein tyrosine kinase docking protein activity // insulin receptor binding	---	---
10454202	1231	Rnf138	-0.685405	-0.799499	-0.840166	-0.947517	-1.08541	0.928537	1.34364	1.35874	1.94228	1.54795	-1.18729	-1.97834	-0.314301	-0.278497	-0.760535	-0.312282	0.297543	0.296518	0.161387	1.53247	-0.0163028	-0.291515	0.559069	-0.544875	0.0737933	0.000151713	NM_207623	RefSeq	Mus musculus ring finger protein 138 (Rnf138), transcript variant 1, mRNA.	FALSE	GO:0006511 // GO:0008150	ubiquitin-dependent protein catabolic process // biological_process	GO:0005575 // GO:0005622	cellular_component // intracellular	GO:0003674 // GO:0005515 // GO:0008270 // GO:0016874 // GO:0046872	molecular_function // protein binding // zinc ion binding // ligase activity // metal ion binding	---	---
10600131	1446	Xlr4b	-0.558656	0.381671	-0.283528	-0.237218	-0.180258	0.139742	0.991051	0.884866	0.917596	1.52356	-1.31569	-0.703662	0.0159959	-0.506681	-0.581468	0.651596	1.69871	1.07022	1.38425	1.05566	-1.07434	-1.34602	-1.25178	-1.38947	-1.28616	0.000152636	NM_021365	RefSeq	Mus musculus X-linked lymphocyte-regulated 4B (Xlr4b), mRNA.	FALSE	---	---	---	---	---	---	---	---
10374333	2262	Ikzf1	-0.57372	-0.968673	-1.53169	-1.18671	-0.575918	0.234211	0.297094	1.58201	1.72005	1.31338	-0.665189	-1.01779	-0.469251	-0.556508	-0.756904	1.3364	-0.461474	0.740746	1.42065	1.39906	-0.993425	-0.00907661	0.673907	-0.875068	-0.0761184	0.000152768	NM_001025597	RefSeq	Mus musculus IKAROS family zinc finger 1 (Ikzf1), transcript variant 1, mRNA.	FALSE	GO:0006350 // GO:0006355 // GO:0016481 // GO:0030097 // GO:0030900 // GO:0040018 // GO:0040018 // GO:0045941 // GO:0045944 // GO:0048732	transcription // regulation of transcription, DNA-dependent // negative regulation of transcription // hemopoiesis // forebrain development // positive regulation of multicellular organism growth // positive regulation of multicellular organism growth // positive regulation of transcription // positive regulation of transcription from RNA polymerase II promoter // gland development	GO:0005622 // GO:0005634 // GO:0005667 // GO:0005721	intracellular // nucleus // transcription factor complex // centromeric heterochromatin	GO:0003676 // GO:0003677 // GO:0003700 // GO:0005515 // GO:0008270 // GO:0016564 // GO:0046872	nucleic acid binding // DNA binding // transcription factor activity // protein binding // zinc ion binding // transcription repressor activity // metal ion binding	---	---
10508961	683	Slc30a2	1.10452	0.846923	0.920262	1.17898	1.41574	-0.795474	-0.483625	-1.82079	-1.64269	-1.15346	1.37136	1.26254	0.549591	0.901703	0.462751	0.229741	-1.01229	-0.0551245	0.201117	-1.6034	-0.445575	-0.274094	-0.166729	-0.896914	-0.095054	0.000152768	NM_001039677	RefSeq	Mus musculus solute carrier family 30 (zinc transporter), member 2 (Slc30a2), mRNA.	FALSE	GO:0008150	biological_process	GO:0005575	cellular_component	GO:0003674	molecular_function	---	---
10516103	2016	Macf1	-0.562456	-1.37596	-0.585067	-0.630958	-0.947174	1.93253	1.26502	1.69272	1.28856	0.510744	-0.949157	-0.646953	-0.583335	-0.273272	-1.02435	-0.333392	1.45388	1.18063	-0.106063	1.12167	0.320066	-0.623545	-1.1674	-0.632825	-0.323907	0.000152848	NM_009600	RefSeq	Mus musculus microtubule-actin crosslinking factor 1 (Macf1), mRNA.	FALSE	GO:0001707 // GO:0006620 // GO:0006928 // GO:0007050 // GO:0007163 // GO:0008104 // GO:0016055 // GO:0016055	mesoderm formation // posttranslational protein targeting to membrane // cell motion // cell cycle arrest // establishment or maintenance of cell polarity // protein localization // Wnt receptor signaling pathway // Wnt receptor signaling pathway	GO:0005737 // GO:0005856 // GO:0005938 // GO:0015629 // GO:0015630	cytoplasm // cytoskeleton // cell cortex // actin cytoskeleton // microtubule cytoskeleton	GO:0003779 // GO:0005509 // GO:0005515 // GO:0008017	actin binding // calcium ion binding // protein binding // microtubule binding	---	---
10459835	1334	---	0.00764522	-0.454055	-0.98387	-0.437916	-0.934523	1.00949	0.25581	0.143945	1.09594	1.87153	-1.2819	-1.00927	-1.64398	-1.01571	-1.45659	0.849509	0.687714	-0.137332	1.84419	0.656078	0.0902413	0.439316	-0.327905	-0.586176	1.31781	0.000152848	BC080318	GenBank	Mus musculus cDNA clone IMAGE:6853468.	FALSE	---	---	---	---	---	---	---	---
10536037	1029	E330014E10Rik	1.48062	0.599839	1.13862	1.94196	1.26387	-0.653518	-0.795403	-1.13125	-0.605999	-0.401436	-0.598692	0.792082	1.37443	0.659052	1.40556	-0.374039	-0.166768	-0.707147	-1.49099	-0.896056	0.144459	-0.0245649	-1.03717	-0.937435	-0.980032	0.000154303	NM_001122668	RefSeq	Mus musculus RIKEN cDNA E330014E10 gene (E330014E10Rik), mRNA.	FALSE	---	---	---	---	---	---	---	---
10536048	1028	D5Ertd577e	1.48062	0.599839	1.13862	1.94196	1.26387	-0.653518	-0.795403	-1.13125	-0.605999	-0.401436	-0.598692	0.792082	1.37443	0.659052	1.40556	-0.374039	-0.166768	-0.707147	-1.49099	-0.896056	0.144459	-0.0245649	-1.03717	-0.937435	-0.980032	0.000154303	NM_177187	RefSeq	Mus musculus DNA segment, Chr 5, ERATO Doi 577, expressed (D5Ertd577e), mRNA.	FALSE	GO:0008150	biological_process	GO:0005575	cellular_component	GO:0003674	molecular_function	---	---
10522606	1372	Exoc1	-1.38037	-0.503996	-0.259811	-1.10569	-1.21286	0.72086	0.668595	0.941327	0.576233	1.12014	-0.157448	-1.44652	-2.20449	-1.33154	-0.603573	-0.0703616	1.43675	0.791071	0.653325	0.00334444	0.572629	0.315083	1.45006	0.929784	0.0974664	0.000154306	NM_027270	RefSeq	Mus musculus exocyst complex component 1 (Exoc1), mRNA.	FALSE	GO:0006810 // GO:0006887 // GO:0015031	transport // exocytosis // protein transport	---	---	---	---	---	---
10488060	2249	Jag1	-0.383839	-0.812161	-0.94636	-0.596467	-0.760942	0.105705	-0.000615045	1.05253	1.82607	1.73783	-0.449586	-0.238086	-0.984091	-0.778598	-1.23681	0.855684	1.81082	0.889481	0.294353	1.57925	-1.44908	-0.893018	0.0185076	-0.178878	-0.461701	0.000155386	NM_013822	RefSeq	Mus musculus jagged 1 (Jag1), mRNA.	FALSE	GO:0002011 // GO:0007154 // GO:0007219 // GO:0007275 // GO:0009887 // GO:0042491 // GO:0045596 // GO:0045639 // GO:0045747 // GO:0048839	morphogenesis of an epithelial sheet // cell communication // Notch signaling pathway // multicellular organismal development // organ morphogenesis // auditory receptor cell differentiation // negative regulation of cell differentiation // positive regulation of myeloid cell differentiation // positive regulation of Notch signaling pathway // inner ear development	GO:0005886 // GO:0016020 // GO:0016021	plasma membrane // membrane // integral to membrane	GO:0005112 // GO:0005509 // GO:0005515	Notch binding // calcium ion binding // protein binding	---	---
10540838	1686	Slc6a1	-0.677971	-0.73909	-0.76432	-0.672569	-0.644317	0.855127	1.03812	1.22946	1.60822	1.80167	0.26874	-1.13758	-1.19412	-0.213537	0.0855857	0.121007	1.51264	0.638314	0.378374	1.32297	-0.581104	-0.878923	-0.959106	-1.33396	-1.06362	0.000158033	NM_178703	RefSeq	Mus musculus solute carrier family 6 (neurotransmitter transporter, GABA), member 1 (Slc6a1), mRNA.	FALSE	GO:0006810 // GO:0006836	transport // neurotransmitter transport	GO:0005886 // GO:0005887 // GO:0016020 // GO:0016021 // GO:0030424	plasma membrane // integral to plasma membrane // membrane // integral to membrane // axon	GO:0005328 // GO:0005332 // GO:0015293	neurotransmitter:sodium symporter activity // gamma-aminobutyric acid:sodium symporter activity // symporter activity	---	---
10510076	841	OTTMUSG00000010130	1.12631	0.825375	1.03518	1.22953	1.17894	-0.0842377	0.0880296	-0.470823	0.0293385	0.0690935	-0.232295	0.857941	1.3228	0.748633	0.977736	-0.297779	-0.0104144	-0.0225765	-0.0798142	-0.510048	-0.88235	-1.08653	-1.69754	-2.2996	-1.81489	0.000158033	NM_001113736	RefSeq	Mus musculus predicted gene, OTTMUSG00000010130 (OTTMUSG00000010130), mRNA.	FALSE	---	---	---	---	---	---	---	---
10510068	840	OTTMUSG00000010130	1.12631	0.825375	1.03518	1.22953	1.17894	-0.0842377	0.0880296	-0.470823	0.0293385	0.0690935	-0.232295	0.857941	1.3228	0.748633	0.977736	-0.297779	-0.0104144	-0.0225765	-0.0798142	-0.510048	-0.88235	-1.08653	-1.69754	-2.2996	-1.81489	0.000158033	NM_001113736	RefSeq	Mus musculus predicted gene, OTTMUSG00000010130 (OTTMUSG00000010130), mRNA.	FALSE	---	---	---	---	---	---	---	---
10510072	839	OTTMUSG00000010130	1.12631	0.825375	1.03518	1.22953	1.17894	-0.0842377	0.0880296	-0.470823	0.0293385	0.0690935	-0.232295	0.857941	1.3228	0.748633	0.977736	-0.297779	-0.0104144	-0.0225765	-0.0798142	-0.510048	-0.88235	-1.08653	-1.69754	-2.2996	-1.81489	0.000158033	NM_001113736	RefSeq	Mus musculus predicted gene, OTTMUSG00000010130 (OTTMUSG00000010130), mRNA.	FALSE	---	---	---	---	---	---	---	---
10598771	2073	Maoa	-0.800204	-0.350423	-0.440669	-1.02087	-0.615297	1.30034	1.33277	1.69875	1.39184	1.18635	-1.50312	-1.29989	0.00550078	-1.67366	0.549415	0.440694	0.285843	0.918414	0.469321	1.22121	-0.88987	-0.574262	-0.493326	-0.451754	-0.687102	0.000159035	NM_173740	RefSeq	Mus musculus monoamine oxidase A (Maoa), nuclear gene encoding mitochondrial protein, mRNA.	FALSE	GO:0006584 // GO:0042135 // GO:0042420 // GO:0055114	catecholamine metabolic process // neurotransmitter catabolic process // dopamine catabolic process // oxidation reduction	GO:0005739 // GO:0005739 // GO:0005741 // GO:0016020 // GO:0016021	mitochondrion // mitochondrion // mitochondrial outer membrane // membrane // integral to membrane	GO:0008131 // GO:0009055 // GO:0016491	amine oxidase activity // electron carrier activity // oxidoreductase activity	---	---
10517301	1178	Ldlrap1	-0.213957	0.277812	0.37675	1.23456	0.586468	-0.839783	-0.590739	0.0151093	-1.19711	-1.19748	1.56855	1.03224	1.29792	1.632	1.0187	-0.578109	-1.21723	-0.159839	-0.782507	0.205418	-0.087767	0.721488	-2.34287	-0.72055	-0.0390779	0.000159035	NM_145554	RefSeq	Mus musculus low density lipoprotein receptor adaptor protein 1 (Ldlrap1), mRNA.	FALSE	GO:0006629 // GO:0006897 // GO:0008202 // GO:0008203 // GO:0042632	lipid metabolic process // endocytosis // steroid metabolic process // cholesterol metabolic process // cholesterol homeostasis	GO:0005737 // GO:0005769	cytoplasm // early endosome	GO:0004872 // GO:0005102 // GO:0005515 // GO:0030276	receptor activity // receptor binding // protein binding // clathrin binding	---	---
10607473	2267	Gm650	-0.39471	-0.498344	-0.758963	-0.281277	-0.538673	0.164765	0.419189	2.22641	0.986956	0.418917	-1.07604	-1.57459	-0.460657	-0.337455	-0.422335	1.32073	0.881323	1.75081	0.980274	1.33677	-0.910692	-0.924596	-0.699076	-1.25062	-0.358118	0.00015921	ENSMUST00000063876	ENSEMBL	similar to ring finger protein 168 gene:ENSMUSG00000052157	FALSE	---	---	---	---	---	---	---	---
10390075	997	OTTMUSG00000002043	1.03279	1.10692	1.05645	1.11517	0.963161	-0.420957	0.142357	-0.288216	-0.293696	-0.371901	0.0462031	0.0265808	1.94803	1.10448	1.85242	-0.7801	-0.606444	-0.476609	-0.730433	-0.679104	-0.467976	-1.29395	-1.39328	-1.10245	-1.48946	0.00015921	NM_001105561	RefSeq	Mus musculus predicted gene, OTTMUSG00000002043 (OTTMUSG00000002043), mRNA.	FALSE	---	---	---	---	---	---	---	---
10376446	26	Trim17	0.262854	1.34767	0.395313	0.378116	0.406256	-0.950626	-0.236716	-0.684901	-1.06382	-1.99326	0.689943	0.524628	0.780006	0.723526	1.71265	0.045607	-1.7091	-1.41253	-1.12716	-0.816109	0.604361	0.751895	-0.441976	1.48786	0.325515	0.000162481	NM_031172	RefSeq	Mus musculus tripartite motif-containing 17 (Trim17), mRNA.	FALSE	GO:0008150	biological_process	GO:0005575 // GO:0005622	cellular_component // intracellular	GO:0003674 // GO:0005515 // GO:0008270 // GO:0046872	molecular_function // protein binding // zinc ion binding // metal ion binding	---	---
10527638	691	Alox5ap	1.25817	-0.437166	1.32891	1.19291	1.18309	-1.0765	-0.896247	-1.10128	-1.65857	-1.27321	2.07091	1.46941	0.632783	0.471114	0.578921	-0.371111	-1.02031	0.241777	-0.452491	-0.647465	0.0579276	-0.605902	-0.0959373	-0.220987	-0.628733	0.000164182	NM_009663	RefSeq	Mus musculus arachidonate 5-lipoxygenase activating protein (Alox5ap), mRNA.	FALSE	GO:0006691 // GO:0019370	leukotriene metabolic process // leukotriene biosynthetic process	GO:0016020 // GO:0016021	membrane // integral to membrane	GO:0008047	enzyme activator activity	GenMAPP	Eicosanoid_Synthesis
10479041	496	Rbm38	0.664112	1.786	0.638569	0.585653	0.509878	-1.03467	-1.43454	-0.658544	-0.219422	-0.442762	2.12266	1.49033	0.352961	0.357714	-0.0796193	-1.21698	-1.27972	-0.960268	-0.91083	-1.49813	-0.337636	0.611354	0.0375127	0.979054	-0.0626801	0.000164182	NM_019547	RefSeq	Mus musculus RNA binding motif protein 38 (Rbm38), mRNA.	FALSE	GO:0007049	cell cycle	GO:0005634 // GO:0005737	nucleus // cytoplasm	GO:0000166 // GO:0003676 // GO:0003723	nucleotide binding // nucleic acid binding // RNA binding	GenMAPP	mRNA_processing_binding_Reactome
10484888	1550	---	-0.350868	-1.58934	-0.172205	-0.475599	-0.444707	0.852936	0.968762	1.53486	1.10328	1.3101	-0.52503	0.0473341	-0.0757806	-0.019777	0.252233	0.648331	0.828332	1.00284	0.444851	1.39071	-1.07644	-1.76543	-1.43745	-1.26048	-1.19147	0.000165855	ENSMUST00000116469	ENSEMBL	cdna:pseudogene chromosome:NCBIM37:2:90014254:90035309:1 gene:ENSMUSG00000080223	FALSE	---	---	---	---	---	---	---	---
10470936	1497	Tbc1d13	0.0391879	-0.376946	0.0314146	-0.156187	0.0352773	0.872595	0.763159	1.27333	1.06843	0.853504	0.213358	-0.556926	-0.00859228	0.224414	0.473192	0.393775	1.11849	0.809621	0.586579	0.919375	-1.88355	-1.73128	-1.38596	-2.1437	-1.43255	0.000165855	NM_146252	RefSeq	Mus musculus TBC1 domain family, member 13 (Tbc1d13), mRNA.	FALSE	GO:0032313	regulation of Rab GTPase activity	GO:0005622	intracellular	GO:0005096 // GO:0005097 // GO:0005515	GTPase activator activity // Rab GTPase activator activity // protein binding	---	---
10446596	2285	Dlgap1	-0.944747	-0.581347	-0.189271	-0.729207	-0.243372	0.507691	0.892715	2.04032	1.2451	1.94708	-0.0592604	-1.41094	-1.33686	-0.606914	-1.36749	0.397946	0.0222499	0.747621	0.252618	1.65365	-0.0430511	-1.27492	-0.00877273	-0.508033	-0.402797	0.000165917	NM_177639	RefSeq	Mus musculus discs, large (Drosophila) homolog-associated protein 1 (Dlgap1), transcript variant 1, mRNA.	FALSE	GO:0007267 // GO:0007268	cell-cell signaling // synaptic transmission	GO:0005886 // GO:0016020 // GO:0030054 // GO:0045202 // GO:0045211	plasma membrane // membrane // cell junction // synapse // postsynaptic membrane	---	---	---	---
10596269	1857	Dnajc13	-0.935428	-1.60305	-0.483571	-0.784823	-1.11044	0.594528	0.825436	0.908585	1.20992	0.754985	-0.151054	-1.73262	-1.26781	-0.17475	-1.26483	0.224726	1.22267	1.27421	-0.304273	1.7965	1.12371	0.379961	-0.449843	-0.354782	0.302055	0.000165917	ENSMUST00000060084	ENSEMBL	Putative uncharacterized protein (Fragment) gene:ENSMUSG00000054574	FALSE	GO:0008150	biological_process	GO:0005575	cellular_component	GO:0003674	molecular_function	---	---
10497165	1655	---	-0.653548	-0.72846	-0.689724	-0.377946	-0.613865	0.900914	0.961266	1.22398	1.99464	1.01806	-0.731578	-1.20962	-0.623389	0.489113	0.243344	0.613814	1.64897	0.510444	0.533028	1.07443	-0.879859	-1.15441	-1.22066	-1.23066	-1.0983	0.000165917	GENSCAN00000005494	ENSEMBL	cdna:Genscan chromosome:NCBIM37:3:4161125:4188920:-1	FALSE	---	---	---	---	---	---	---	---
10470564	94	Ralgds	0.499949	-0.68049	1.68757	0.613234	0.606865	-1.30547	-0.79426	-1.02224	-2.00004	-1.43711	0.458111	0.416397	1.12495	0.712211	1.14055	-0.569757	-1.31491	-0.359797	-0.307879	-1.07649	1.25428	0.649093	0.669247	0.0840511	0.951935	0.000167608	NM_009058	RefSeq	Mus musculus ral guanine nucleotide dissociation stimulator (Ralgds), mRNA.	FALSE	GO:0007165 // GO:0007264 // GO:0051056	signal transduction // small GTPase mediated signal transduction // regulation of small GTPase mediated signal transduction	GO:0005622	intracellular	GO:0005085 // GO:0005515	guanyl-nucleotide exchange factor activity // protein binding	---	---
10423770	1284	Grhl2	-0.307166	-1.23234	-0.286756	-0.154041	-0.0857814	0.86618	1.09433	1.1531	0.611772	0.865189	-1.79336	-0.0819815	-1.3564	-1.76473	-2.4158	0.496312	0.143559	1.19157	0.727323	0.82342	0.029323	0.143559	0.859784	0.0196687	0.453271	0.000168336	NM_026496	RefSeq	Mus musculus grainyhead-like 2 (Drosophila) (Grhl2), mRNA.	FALSE	GO:0006350 // GO:0006355 // GO:0045449	transcription // regulation of transcription, DNA-dependent // regulation of transcription	GO:0005634	nucleus	GO:0003677 // GO:0003700	DNA binding // transcription factor activity	---	---
10522554	1035	D5Ertd577e	1.42784	0.627081	1.3303	2.08369	1.2041	-0.605306	-0.70181	-1.15873	-0.521143	-0.355198	-0.636494	0.772739	1.51509	0.755027	0.918049	-0.489647	-0.164115	-0.701646	-1.42834	-0.916289	0.0711716	-0.0163845	-1.10686	-0.860313	-1.04281	0.000170594	NM_177187	RefSeq	Mus musculus DNA segment, Chr 5, ERATO Doi 577, expressed (D5Ertd577e), mRNA.	FALSE	GO:0008150	biological_process	GO:0005575	cellular_component	GO:0003674	molecular_function	---	---
10522569	1034	D5Ertd577e	1.42784	0.627081	1.3303	2.08369	1.2041	-0.605306	-0.70181	-1.15873	-0.521143	-0.355198	-0.636494	0.772739	1.51509	0.755027	0.918049	-0.489647	-0.164115	-0.701646	-1.42834	-0.916289	0.0711716	-0.0163845	-1.10686	-0.860313	-1.04281	0.000170594	NM_177187	RefSeq	Mus musculus DNA segment, Chr 5, ERATO Doi 577, expressed (D5Ertd577e), mRNA.	FALSE	GO:0008150	biological_process	GO:0005575	cellular_component	GO:0003674	molecular_function	---	---
10412227	2165	Snx18	-1.55427	-0.376813	-0.817171	-1.32823	-1.37706	0.677555	1.4097	2.12527	1.52892	1.30301	-0.457559	-1.40788	-0.662866	-0.645189	-0.126698	0.030868	0.32927	0.484628	0.313699	1.29154	0.387938	-0.178553	-0.377127	-0.762296	0.189313	0.000170841	NM_130796	RefSeq	Mus musculus sorting nexin 18 (Snx18), mRNA.	FALSE	GO:0006810 // GO:0007154 // GO:0015031	transport // cell communication // protein transport	GO:0016020	membrane	GO:0005515 // GO:0035091	protein binding // phosphoinositide binding	---	---
10604984	1447	Xlr4b	-0.490334	0.409385	-0.263321	-0.197503	-0.0856614	0.199077	0.960849	0.91565	0.922248	1.49049	-1.29396	-0.632652	0.0685467	-0.458833	-0.606716	0.625868	1.64905	1.0474	1.35784	1.0138	-1.11725	-1.44109	-1.27526	-1.41895	-1.37866	0.000170841	NM_021365	RefSeq	Mus musculus X-linked lymphocyte-regulated 4B (Xlr4b), mRNA.	FALSE	---	---	---	---	---	---	---	---
10449527	1800	Stk38	-0.0131368	-0.759003	0.0332706	0.0741981	0.048856	0.647734	0.987959	1.14611	1.55467	0.902246	-1.27614	-0.759757	-0.239415	-1.2574	-2.08375	0.266202	1.52488	1.20196	0.962542	0.671164	0.0332706	-0.710509	-1.15311	-1.45362	-0.349211	0.000171036	NM_134115	RefSeq	Mus musculus serine/threonine kinase 38 (Stk38), mRNA.	FALSE	GO:0006468	protein amino acid phosphorylation	GO:0005634	nucleus	GO:0000166 // GO:0000287 // GO:0004672 // GO:0004674 // GO:0005524 // GO:0016301 // GO:0016740 // GO:0046872	nucleotide binding // magnesium ion binding // protein kinase activity // protein serine/threonine kinase activity // ATP binding // kinase activity // transferase activity // metal ion binding	---	---
10374366	2250	Egfr	-0.0261179	-0.79399	-0.96013	-0.572379	-0.94509	0.500841	0.409832	1.33	1.23906	1.31274	-0.623068	0.640595	-0.659989	-0.485428	-1.01583	0.841428	1.93279	0.621326	0.554522	1.52642	-1.82705	-1.09821	-0.654025	-0.450753	-0.797484	0.00017111	NM_207655	RefSeq	Mus musculus epidermal growth factor receptor (Egfr), transcript variant 1, mRNA.	FALSE	GO:0006468 // GO:0007165 // GO:0007166 // GO:0007169 // GO:0007173 // GO:0007173 // GO:0007173 // GO:0008284 // GO:0008284 // GO:0008284 // GO:0042127 // GO:0046777 // GO:0050730	protein amino acid phosphorylation // signal transduction // cell surface receptor linked signal transduction // transmembrane receptor protein tyrosine kinase signaling pathway // epidermal growth factor receptor signaling pathway // epidermal growth factor receptor signaling pathway // epidermal growth factor receptor signaling pathway // positive regulation of cell proliferation // positive re…	GO:0005622 // GO:0005886 // GO:0016020 // GO:0016021 // GO:0016323 // GO:0030139	intracellular // plasma membrane // membrane // integral to membrane // basolateral plasma membrane // endocytic vesicle	GO:0000166 // GO:0004672 // GO:0004713 // GO:0004714 // GO:0004871 // GO:0004872 // GO:0004888 // GO:0005006 // GO:0005515 // GO:0005524 // GO:0009055 // GO:0016301 // GO:0016740 // GO:0051536	nucleotide binding // protein kinase activity // protein tyrosine kinase activity // transmembrane receptor protein tyrosine kinase activity // signal transducer activity // receptor activity // transmembrane receptor activity // epidermal growth factor receptor activity // protein binding // ATP binding // electron carrier activity // kinase activity // transferase activity // iron-sulfur cluste…	---	---
10580382	923	Neto2	1.61766	1.00856	1.06161	1.46627	0.732498	-0.90532	-0.0938318	-0.985345	-0.523672	-0.38301	-0.204536	1.66746	1.0561	0.457711	1.20315	-0.162246	-0.0721733	-0.447862	-1.54103	-1.07951	-0.2821	-0.535677	-0.0721733	-1.76138	-1.22114	0.000171839	NM_001081324	RefSeq	Mus musculus neuropilin (NRP) and tolloid (TLL)-like 2 (Neto2), mRNA.	FALSE	---	---	GO:0005886 // GO:0016020 // GO:0016021	plasma membrane // membrane // integral to membrane	GO:0004872	receptor activity	---	---
10345200	972	---	1.23804	0.719533	1.25972	1.58099	1.35236	-0.870715	-0.623139	-1.16959	0.000177926	-0.19783	-0.618164	0.96797	1.84248	0.950174	1.21396	-0.882105	-0.255816	-0.615506	-0.612107	-0.687264	-0.765477	-0.947546	-0.963406	-0.768603	-1.14815	0.000173331	GENSCAN00000044986	ENSEMBL	cdna:Genscan chromosome:NCBIM37:1:31331747:31399897:1	FALSE	---	---	---	---	---	---	---	---
10553309	1951	Ldhc	0.0640573	-1.71126	-1.36735	-0.839314	-0.928914	1.55381	1.26452	1.70095	1.49551	0.752448	-0.344886	-0.330313	-1.20473	-0.58637	-1.61856	0.0146874	0.521842	0.0852101	0.472051	1.2568	-0.53382	0.461901	-0.208827	-0.556418	0.586965	0.0001737	NM_013580	RefSeq	Mus musculus lactate dehydrogenase C (Ldhc), mRNA.	FALSE	GO:0005975 // GO:0006096 // GO:0019642 // GO:0044262 // GO:0055114	carbohydrate metabolic process // glycolysis // anaerobic glycolysis // cellular carbohydrate metabolic process // oxidation reduction	GO:0005737	cytoplasm	GO:0003824 // GO:0004459 // GO:0016491 // GO:0016616	catalytic activity // L-lactate dehydrogenase activity // oxidoreductase activity // oxidoreductase activity, acting on the CH-OH group of donors, NAD or NADP as acceptor	GenMAPP	Glycolysis_and_Gluconeogenesis
10450226	1249	Ppt2	-1.73375	-1.6338	-0.452044	-1.98141	-0.90501	0.141216	1.3736	1.65157	0.832749	0.757699	-0.443928	-0.818824	-1.13184	-0.205426	-0.604135	0.466885	0.181758	1.16887	0.20327	1.53441	0.505513	0.0846827	0.144103	0.0797125	0.784113	0.000174105	NM_019441	RefSeq	Mus musculus palmitoyl-protein thioesterase 2 (Ppt2), mRNA.	FALSE	GO:0006464	protein modification process	GO:0005764	lysosome	GO:0008474 // GO:0016787	palmitoyl-(protein) hydrolase activity // hydrolase activity	---	---
10531497	1033	D5Ertd577e	1.47232	0.649225	1.43095	2.04628	1.19187	-0.584735	-0.627216	-1.15292	-0.554212	-0.394435	-0.664138	0.751038	1.48565	0.780059	0.86511	-0.43696	-0.142646	-0.748882	-1.3277	-0.880388	0.0576334	-0.0653488	-1.1847	-0.930593	-1.03526	0.000174105	NM_177187	RefSeq	Mus musculus DNA segment, Chr 5, ERATO Doi 577, expressed (D5Ertd577e), mRNA.	FALSE	GO:0008150	biological_process	GO:0005575	cellular_component	GO:0003674	molecular_function	---	---
10349953	896	Chit1	1.32226	1.32213	1.03285	1.44598	1.34236	-0.468799	0.0315518	-0.250363	0.0956628	0.514084	-0.351868	0.893842	1.42509	0.859821	0.3105	-0.851253	-0.462274	-0.401543	-0.192842	-0.926689	-0.907543	-1.48549	-1.33138	-1.49931	-1.46678	0.000174105	NM_027979	RefSeq	Mus musculus chitinase 1 (chitotriosidase) (Chit1), mRNA.	FALSE	GO:0000272 // GO:0005975 // GO:0006030 // GO:0006032 // GO:0008152	polysaccharide catabolic process // carbohydrate metabolic process // chitin metabolic process // chitin catabolic process // metabolic process	GO:0005576 // GO:0005764	extracellular region // lysosome	GO:0003824 // GO:0004553 // GO:0004568 // GO:0008061 // GO:0016787 // GO:0016798 // GO:0043169	catalytic activity // hydrolase activity, hydrolyzing O-glycosyl compounds // chitinase activity // chitin binding // hydrolase activity // hydrolase activity, acting on glycosyl bonds // cation binding	---	---
10374767	1636	---	-0.24362	-0.872782	-0.694108	-0.152925	-0.611837	0.892172	0.935044	0.879304	1.43812	1.25245	-0.246987	-0.943694	-0.524978	0.553284	0.497495	0.684236	1.4089	0.606474	0.722234	1.05139	-0.598271	-0.994886	-2.00755	-1.40631	-1.62316	0.000177579	GENSCAN00000012355	ENSEMBL	cdna:Genscan chromosome:NCBIM37:11:26969926:27075899:1	FALSE	---	---	---	---	---	---	---	---
10357535	1404	Pfkfb2	0.0257416	-1.07459	-0.276224	-0.997806	-0.40359	0.132825	1.46251	1.27167	0.377437	0.714047	-1.27221	-0.675385	-0.698263	-0.744717	-1.41246	0.552232	2.09137	1.51878	0.348526	1.43221	-1.51259	0.111324	-0.431581	0.105655	-0.644903	0.000178701	NM_008825	RefSeq	Mus musculus 6-phosphofructo-2-kinase/fructose-2,6-biphosphatase 2 (Pfkfb2), mRNA.	FALSE	GO:0006000 // GO:0006003 // GO:0008152	fructose metabolic process // fructose 2,6-bisphosphate metabolic process // metabolic process	---	---	GO:0000166 // GO:0003824 // GO:0003873 // GO:0004331 // GO:0005524 // GO:0016301 // GO:0016740 // GO:0016787	nucleotide binding // catalytic activity // 6-phosphofructo-2-kinase activity // fructose-2,6-bisphosphate 2-phosphatase activity // ATP binding // kinase activity // transferase activity // hydrolase activity	---	---
10536147	1030	AU018829	1.44677	0.52018	1.30138	2.04523	1.20656	-0.618651	-0.771742	-1.13965	-0.58166	-0.38271	-0.649175	0.809893	1.34059	0.72253	1.24299	-0.368275	-0.192483	-0.699934	-1.43936	-1.00868	0.13991	-0.0177511	-1.06456	-0.914236	-0.927174	0.000178701	ENSMUST00000111414	ENSEMBL	Putative uncharacterized protein gene:ENSMUSG00000079214	FALSE	---	---	---	---	---	---	---	---
10518192	962	Pramel5	1.26304	0.900934	1.10095	1.70763	1.56968	-0.582543	-0.790284	-0.590228	-0.654949	-0.254055	-0.676237	1.03732	1.89838	0.630019	0.997823	-0.31787	-0.708246	-0.454771	-0.348445	-0.890075	-0.625761	-0.978596	-1.00278	-1.33807	-0.892864	0.000178701	NM_001085418	RefSeq	Mus musculus preferentially expressed antigen in melanoma like 5 (Pramel5), mRNA.	FALSE	---	---	---	---	---	---	---	---
10449000	1723	Msln	-0.576607	-1.26451	-0.561416	-0.576142	-0.611668	0.323517	0.780985	2.26728	2.1023	1.68294	-1.55192	-1.00205	-0.491298	-0.158449	-0.681277	0.0848666	0.820538	0.573426	0.400369	0.995592	-0.478103	-0.83811	-0.453254	-0.701746	-0.0852652	0.000178994	NM_018857	RefSeq	Mus musculus mesothelin (Msln), mRNA.	FALSE	GO:0007155	cell adhesion	GO:0005576 // GO:0005794 // GO:0005886 // GO:0016020 // GO:0031225	extracellular region // Golgi apparatus // plasma membrane // membrane // anchored to membrane	GO:0005515	protein binding	---	---
10456513	1799	Mc5r	-0.020139	-0.165912	-0.69437	-0.426724	0.1745	0.731223	0.516001	0.397764	0.679773	1.04213	-1.58917	-0.391225	-0.521837	-0.302664	-1.25301	1.22696	1.06138	1.68696	1.32134	1.68708	-0.629598	-1.26677	-1.239	-1.51324	-0.511452	0.00018289	NM_013596	RefSeq	Mus musculus melanocortin 5 receptor (Mc5r), mRNA.	FALSE	GO:0007165 // GO:0007186	signal transduction // G-protein coupled receptor protein signaling pathway	GO:0005886 // GO:0016020 // GO:0016021	plasma membrane // membrane // integral to membrane	GO:0004871 // GO:0004872 // GO:0004930 // GO:0004977	signal transducer activity // receptor activity // G-protein coupled receptor activity // melanocortin receptor activity	---	---
10578950	1386	ENSMUSG00000074303	-1.43381	0.535291	-1.18619	-1.15714	-0.940204	0.735336	1.20344	1.00515	0.664539	0.387783	-1.31707	-0.0721491	-1.20974	-2.16847	-0.89904	0.513418	0.689133	1.09877	0.330765	0.822313	-0.587872	0.629544	0.758034	1.24486	0.353305	0.00018289	ENSMUST00000098718	ENSEMBL	Putative uncharacterized protein gene:ENSMUSG00000074303	FALSE	---	---	---	---	---	---	---	---
10530910	1355	Uba6	-1.23785	-0.506076	-0.622244	-1.34854	-1.28971	-0.358283	0.0123063	0.493355	0.176409	0.613015	-0.675077	-0.849954	-1.67009	-0.892909	-0.900529	0.163532	0.574628	1.02259	-0.329188	1.03661	0.707811	1.62066	1.80799	1.20178	1.24976	0.000183061	NM_172712	RefSeq	Mus musculus ubiquitin-like modifier activating enzyme 6 (Uba6), mRNA.	FALSE	GO:0006464 // GO:0006511 // GO:0008152	protein modification process // ubiquitin-dependent protein catabolic process // metabolic process	---	---	GO:0000166 // GO:0003824 // GO:0005488 // GO:0005524 // GO:0008641 // GO:0016874	nucleotide binding // catalytic activity // binding // ATP binding // small protein activating enzyme activity // ligase activity	---	---
10567297	2257	Itpripl2	-0.356857	-0.35517	-0.865538	-0.633883	-0.785595	0.440904	0.333066	0.998809	1.07733	1.77927	-0.865538	0.428592	-0.966634	-0.492379	-0.924886	1.17175	2.30759	0.987153	0.560588	0.730743	-1.0453	-1.16679	-0.530869	-0.433851	-1.39251	0.000183275	NM_001033380	RefSeq	Mus musculus inositol 1,4,5-triphosphate receptor interacting protein-like 2 (Itpripl2), mRNA.	FALSE	---	---	GO:0016020 // GO:0016021	membrane // integral to membrane	---	---	---	---
10584315	2227	---	-0.131062	-1.38827	-0.758032	-0.689795	-1.13031	1.67685	0.882945	0.734173	1.10101	1.2594	-0.774269	-0.27748	-0.777391	-0.68947	-1.05512	-0.051967	1.71146	1.79269	0.010874	0.312059	0.693	-0.26357	-1.73262	-0.103054	-0.352046	0.000185942	---	---	---	---	---	---	---	---	---	---	---	---
10476969	1068	Pygb	0.716188	0.465108	0.941603	0.932449	0.437161	-1.29677	-0.491104	-0.668029	-1.64385	-1.32292	1.61104	0.272196	0.107549	1.07728	2.48023	-0.206958	-0.702696	-0.324331	-0.492636	-1.21558	1.00982	0.100362	-0.523041	-0.480162	-0.782904	0.000188089	NM_153781	RefSeq	Mus musculus brain glycogen phosphorylase (Pygb), mRNA.	FALSE	GO:0005975 // GO:0005977	carbohydrate metabolic process // glycogen metabolic process	GO:0030424	axon	GO:0003824 // GO:0004645 // GO:0016740 // GO:0016757 // GO:0030170	catalytic activity // phosphorylase activity // transferase activity // transferase activity, transferring glycosyl groups // pyridoxal phosphate binding	---	---
10358038	338	Rnpep	0.267813	1.64143	0.940908	0.518671	0.493651	-1.10991	-0.608886	-0.700472	-1.11676	-0.558087	1.17814	0.563014	0.983309	0.759559	1.57481	-1.32888	-1.78551	0.216612	-0.412174	-2.22304	0.221829	0.50824	-0.158143	0.0442437	0.0896347	0.00018906	NM_145417	RefSeq	Mus musculus arginyl aminopeptidase (aminopeptidase B) (Rnpep), mRNA.	FALSE	GO:0006508 // GO:0019370	proteolysis // leukotriene biosynthetic process	GO:0005576 // GO:0005615	extracellular region // extracellular space	GO:0004177 // GO:0008233 // GO:0008237 // GO:0008270 // GO:0016787 // GO:0046872	aminopeptidase activity // peptidase activity // metallopeptidase activity // zinc ion binding // hydrolase activity // metal ion binding	GenMAPP	mRNA_processing_binding_Reactome
10567299	2255	Itpripl2	-0.611432	-0.230312	-0.749008	-0.764137	-0.39972	0.581721	0.478981	0.997501	1.06268	1.28729	-0.537206	0.515316	-1.37996	-0.751186	-1.0703	1.26792	2.39267	0.568841	1.07234	0.733012	-1.39941	-0.744677	-0.559396	-1.00388	-0.757637	0.000190761	NM_001033380	RefSeq	Mus musculus inositol 1,4,5-triphosphate receptor interacting protein-like 2 (Itpripl2), mRNA.	FALSE	---	---	GO:0016020 // GO:0016021	membrane // integral to membrane	---	---	---	---
10510399	1455	Masp2	0.369898	-0.295561	-0.0302622	-0.321345	-0.402005	0.802637	1.08717	1.3724	1.12046	0.952515	-0.749534	-0.157823	-0.513757	0.357519	-1.46138	0.911131	0.635167	1.30287	1.42764	0.376107	-1.30523	-1.42934	-1.47055	-1.58837	-0.990363	0.00019287	NM_001003893	RefSeq	Mus musculus mannan-binding lectin serine peptidase 2 (Masp2), transcript variant 1, mRNA.	FALSE	GO:0006508 // GO:0006955 // GO:0006958 // GO:0045087	proteolysis // immune response // complement activation, classical pathway // innate immune response	GO:0005576	extracellular region	GO:0004252 // GO:0005509 // GO:0008233 // GO:0008236 // GO:0016787 // GO:0046872	serine-type endopeptidase activity // calcium ion binding // peptidase activity // serine-type peptidase activity // hydrolase activity // metal ion binding	---	---
10524004	792	Pcgf3	0.654153	1.099	1.12597	0.739334	0.172584	-0.410701	-0.0934954	-0.583275	-1.60796	-1.4007	0.907765	1.00705	1.56559	1.4992	0.694079	-1.56434	-0.994074	0.0594095	-0.100741	-1.86858	-0.0519047	0.534117	-0.501967	0.0927136	-0.973231	0.00019287	NM_172716	RefSeq	Mus musculus polycomb group ring finger 3 (Pcgf3), mRNA.	FALSE	GO:0006350 // GO:0006355	transcription // regulation of transcription, DNA-dependent	---	---	GO:0005515 // GO:0008270 // GO:0046872	protein binding // zinc ion binding // metal ion binding	---	---
10447634	2278	Unc93a	-0.289552	0.0801546	-1.05239	-1.14397	-0.589015	0.749583	0.595865	0.74623	1.06899	2.23285	-0.644002	-1.27622	-0.19534	-0.731183	-0.299398	1.27656	0.486669	0.370482	1.00558	1.93941	-0.631485	-1.02857	-0.762315	-1.27266	-0.636272	0.000195001	NM_199252	RefSeq	Mus musculus unc-93 homolog A (C. elegans) (Unc93a), mRNA.	FALSE	GO:0008150	biological_process	GO:0005575 // GO:0005886 // GO:0016020 // GO:0016021	cellular_component // plasma membrane // membrane // integral to membrane	GO:0003674	molecular_function	---	---
10607848	1439	Egfl6	0.0583141	-0.773116	0.0212091	0.102046	0.347246	0.563246	1.29636	0.704223	0.552967	0.506032	-0.658519	-0.370255	-0.160236	-0.255271	-0.203043	1.06696	1.38915	1.63441	0.768245	1.01306	-1.07453	-1.33302	-1.35876	-1.83152	-2.00521	0.000195001	NM_019397	RefSeq	Mus musculus EGF-like-domain, multiple 6 (Egfl6), mRNA.	FALSE	GO:0007155 // GO:0007275 // GO:0010811 // GO:0030154 // GO:0030198	cell adhesion // multicellular organismal development // positive regulation of cell-substrate adhesion // cell differentiation // extracellular matrix organization	GO:0005576 // GO:0005604 // GO:0016020 // GO:0031012	extracellular region // basement membrane // membrane // extracellular matrix	GO:0005509 // GO:0005515	calcium ion binding // protein binding	---	---
10603026	988	Ctps2	0.629834	0.586782	1.29726	0.920171	0.909316	-0.657891	0.175773	-0.330219	-1.61273	-1.37746	0.534873	1.07559	1.54826	1.17023	1.52715	-0.29498	-1.41192	0.159726	0.0513515	-1.13084	-0.104086	-0.602168	-1.36637	-0.516487	-1.18115	0.000195001	NM_018737	RefSeq	Mus musculus cytidine 5'-triphosphate synthase 2 (Ctps2), mRNA.	FALSE	GO:0006221 // GO:0006541	pyrimidine nucleotide biosynthetic process // glutamine metabolic process	GO:0005575	cellular_component	GO:0003824 // GO:0003883 // GO:0016874	catalytic activity // CTP synthase activity // ligase activity	---	---
10478389	1588	Hnf4a	0.0907001	-0.779722	-0.482073	-0.533048	-0.378621	0.987295	1.38282	2.75206	1.04048	1.11171	-0.56208	-0.809564	-0.266337	-0.0913736	-0.83391	0.49773	0.2294	0.772941	0.6147	0.593465	-1.6314	-1.01199	-0.638683	-1.45551	-0.598993	0.000196833	NM_008261	RefSeq	Mus musculus hepatic nuclear factor 4, alpha (Hnf4a), mRNA.	FALSE	GO:0006350 // GO:0006355 // GO:0006629 // GO:0045944 // GO:0045944 // GO:0045944	transcription // regulation of transcription, DNA-dependent // lipid metabolic process // positive regulation of transcription from RNA polymerase II promoter // positive regulation of transcription from RNA polymerase II promoter // positive regulation of transcription from RNA polymerase II promoter	GO:0005634 // GO:0005634	nucleus // nucleus	GO:0003677 // GO:0003677 // GO:0003700 // GO:0003700 // GO:0003705 // GO:0003707 // GO:0004872 // GO:0004879 // GO:0005496 // GO:0008270 // GO:0033613 // GO:0043565 // GO:0046872	DNA binding // DNA binding // transcription factor activity // transcription factor activity // RNA polymerase II transcription factor activity, enhancer binding // steroid hormone receptor activity // receptor activity // ligand-dependent nuclear receptor activity // steroid binding // zinc ion binding // transcription activator binding // sequence-specific DNA binding // metal ion binding	GenMAPP	Nuclear_Receptors
10547701	2027	Pex5	-0.918586	-0.549584	-0.325398	-0.326249	-0.591577	0.516155	1.03514	1.80522	1.18539	1.69315	0.341556	-1.85264	-0.478875	-1.05122	-0.678497	0.665933	0.339088	0.330799	0.540359	0.678922	0.443632	0.508992	-0.32435	-2.39798	-0.589358	0.00020021	NM_008995	RefSeq	Mus musculus peroxisome biogenesis factor 5 (Pex5), transcript variant 1, mRNA.	FALSE	GO:0000038 // GO:0001764 // GO:0006625 // GO:0006635 // GO:0006810 // GO:0007005 // GO:0007006 // GO:0007029 // GO:0007031 // GO:0007031 // GO:0008299 // GO:0015031 // GO:0021795 // GO:0021895 // GO:0040018 // GO:0044255 // GO:0048468 // GO:0050905	very-long-chain fatty acid metabolic process // neuron migration // protein targeting to peroxisome // fatty acid beta-oxidation // transport // mitochondrion organization // mitochondrial membrane organization // endoplasmic reticulum organization // peroxisome organization // peroxisome organization // isoprenoid biosynthetic process // protein transport // cerebral cortex cell migration // cer…	GO:0005737 // GO:0005777 // GO:0016020	cytoplasm // peroxisome // membrane	GO:0000268 // GO:0005488 // GO:0005515	peroxisome targeting sequence binding // binding // protein binding	---	---
10459109	1278	Tcof1	-0.879235	-0.472778	-0.448262	-0.789416	-0.616069	0.87588	0.951013	1.15493	1.41956	1.25361	-0.222552	-0.849135	-2.14685	-1.15969	-1.79564	0.534479	-0.706198	0.651231	-0.447103	0.819624	-0.0366464	-0.0188579	1.43251	0.690674	0.804917	0.00020021	NM_011552	RefSeq	Mus musculus Treacher Collins Franceschetti syndrome 1, homolog (Tcof1), mRNA.	FALSE	GO:0006810 // GO:0042790	transport // transcription of nuclear rRNA large RNA polymerase I transcript	GO:0005634 // GO:0005730	nucleus // nucleolus	---	---	---	---
10496638	1353	Odf2l	-1.52566	-0.0364392	-1.36011	-1.63244	-0.917752	0.326465	0.7089	1.015	0.613208	0.364324	-1.71577	-0.659079	-0.923568	-1.61076	-0.0138283	0.0591332	0.851386	0.773354	0.0723847	0.452845	1.50712	0.566166	1.18034	0.996625	0.908157	0.000206605	NM_025714	RefSeq	Mus musculus outer dense fiber of sperm tails 2-like (Odf2l), mRNA.	FALSE	---	---	---	---	---	---	---	---
10448748	1910	Nubp2	0.0352168	-1.16578	-0.591989	0.0659457	0.156793	0.977077	0.990958	0.610101	1.71134	1.69271	-0.391011	0.026153	-1.7762	-0.971135	-1.68645	0.958736	0.717185	0.663647	0.591184	0.752394	-1.74864	-0.277569	0.109455	-0.917491	-0.532626	0.000207885	NM_011956	RefSeq	Mus musculus nucleotide binding protein 2 (Nubp2), mRNA.	FALSE	---	---	GO:0005634	nucleus	GO:0000166 // GO:0003674 // GO:0005524	nucleotide binding // molecular_function // ATP binding	---	---
10401831	865	EG435337	1.17502	0.918487	0.898015	1.211	1.04767	-0.330753	0.0519472	-0.814487	0.0399466	-0.122945	-0.299543	0.776504	1.36087	0.874996	1.28243	-0.296049	0.0354608	-0.156973	-0.473687	-0.806188	-0.0237408	-0.501561	-1.9635	-2.0513	-1.83164	0.000207885	NM_001013824	RefSeq	Mus musculus predicted gene, EG435337 (EG435337), mRNA.	FALSE	---	---	---	---	---	---	GenMAPP	Translation_Factors
10397551	864	100042776 // BB287469	1.16198	0.843127	0.910198	1.37374	1.08911	-0.289848	-0.0413087	-0.967376	0.00831114	-0.0519407	-0.34724	0.763755	1.50577	1.01709	1.22168	-0.617496	0.039976	-0.47997	-0.36698	-0.65317	-0.162356	-0.536438	-1.44105	-2.11398	-1.86558	0.000207885	ENSMUST00000095510	ENSEMBL	Putative uncharacterized protein gene:ENSMUSG00000071217	FALSE	---	---	---	---	---	---	---	---
10379401	457	Rnf135	0.909029	0.666338	2.33242	0.521529	0.919639	-0.527416	-0.497193	-0.882327	-0.955473	-1.49269	0.0925251	0.634969	0.97709	-0.452638	-0.218328	-1.10249	-1.18008	-1.4447	-0.62543	-1.14297	0.498482	0.231278	1.22007	0.137976	1.3804	0.000207885	NM_028019	RefSeq	Mus musculus ring finger protein 135 (Rnf135), mRNA.	FALSE	---	---	---	---	GO:0004872 // GO:0005515 // GO:0008270 // GO:0046872	receptor activity // protein binding // zinc ion binding // metal ion binding	---	---
10446771	164	Lclat1	-0.0245304	0.436627	0.975436	0.440442	0.230196	-1.70298	-1.34919	-0.895688	-2.0619	-1.12265	0.287967	0.872271	1.10358	0.130181	1.85483	0.187449	0.00339495	-0.80058	-0.790098	-0.819296	1.83473	-0.182316	0.303527	0.568139	0.520446	0.000207885	NM_001081071	RefSeq	Mus musculus lysocardiolipin acyltransferase (Lycat), mRNA.	FALSE	GO:0008152 // GO:0008654	metabolic process // phospholipid biosynthetic process	GO:0005783 // GO:0016020 // GO:0016021	endoplasmic reticulum // membrane // integral to membrane	GO:0003841 // GO:0008415 // GO:0016740	1-acylglycerol-3-phosphate O-acyltransferase activity // acyltransferase activity // transferase activity	---	---
10592734	101	Cbl	0.705771	-0.268075	0.907398	1.14806	0.819346	-0.394983	-0.602549	-1.13684	-1.93443	-1.89543	0.224102	1.24916	1.69531	1.35271	0.885949	-0.936942	-1.25623	0.470903	-0.819934	-0.93513	0.247129	0.132154	0.2545	0.0472581	0.0407907	0.000207885	NM_007619	RefSeq	Mus musculus Casitas B-lineage lymphoma (Cbl), mRNA.	FALSE	GO:0006511 // GO:0007166	ubiquitin-dependent protein catabolic process // cell surface receptor linked signal transduction	GO:0005634 // GO:0005737	nucleus // cytoplasm	GO:0004871 // GO:0005509 // GO:0005515 // GO:0008270 // GO:0016874 // GO:0046872	signal transducer activity // calcium ion binding // protein binding // zinc ion binding // ligase activity // metal ion binding	---	---
10607454	1824	Magea1	-0.459172	-0.36808	-0.284517	-0.493559	-0.173435	0.781922	1.6289	-0.0280409	1.59842	2.15762	-1.19672	-0.173435	-1.27399	-0.904698	-0.856918	1.33176	1.13704	0.82864	-0.173435	1.00658	-0.73881	-0.988334	-0.693157	-0.845392	-0.819187	0.000209201	NM_020015	RefSeq	Mus musculus melanoma antigen, family A, 1 (Magea1), mRNA.	FALSE	---	---	---	---	---	---	---	---
10565315	2218	Fah	-0.927175	-1.39591	-0.161881	-1.14302	-0.881972	0.661787	1.68029	1.90472	0.905613	1.21239	-0.661833	-0.745374	-0.140641	-0.595966	0.246902	0.14645	0.679981	1.34523	0.300305	1.25595	-0.0584695	-0.746719	-1.76667	-0.23396	-0.880016	0.000209546	NM_010176	RefSeq	Mus musculus fumarylacetoacetate hydrolase (Fah), mRNA.	FALSE	GO:0006527 // GO:0006559 // GO:0006572 // GO:0008152 // GO:0009072	arginine catabolic process // L-phenylalanine catabolic process // tyrosine catabolic process // metabolic process // aromatic amino acid family metabolic process	---	---	GO:0000287 // GO:0003824 // GO:0004334 // GO:0005509 // GO:0016787 // GO:0046872	magnesium ion binding // catalytic activity // fumarylacetoacetase activity // calcium ion binding // hydrolase activity // metal ion binding	---	---
10486057	2321	Rab5b	-0.949766	-0.883153	-0.441792	-0.535201	-1.07719	0.567787	1.05095	2.34343	0.709263	1.00364	-1.32267	-0.877681	-0.0398918	-1.19462	0.504325	0.864306	0.817963	0.575624	0.742955	1.55288	0.130051	-1.02286	-1.03847	-0.960024	-0.519856	0.000210588	NM_011229	RefSeq	Mus musculus RAB5B, member RAS oncogene family (Rab5b), mRNA.	FALSE	GO:0006810 // GO:0007032 // GO:0007264 // GO:0015031 // GO:0030100	transport // endosome organization // small GTPase mediated signal transduction // protein transport // regulation of endocytosis	GO:0005768 // GO:0005886 // GO:0016020 // GO:0030139	endosome // plasma membrane // membrane // endocytic vesicle	GO:0000166 // GO:0003924 // GO:0005525	nucleotide binding // GTPase activity // GTP binding	---	---
10401834	888	EG266459	1.45605	0.439436	0.989116	1.63305	1.12034	-0.570463	-0.420261	-0.953772	-0.360001	-0.397633	-0.419153	0.693257	1.69541	1.1288	1.44835	-0.431473	-0.0546708	-0.358688	-0.45441	-0.856822	-0.369373	-0.678488	-1.11234	-1.7822	-1.38407	0.000210588	NR_003647	RefSeq	Mus musculus predicted gene, EG266459 (EG266459), non-coding RNA.	FALSE	---	---	---	---	---	---	---	---
10385382	1612	Sft2d1	-0.408759	-0.224062	-0.125121	-0.773702	-0.347338	0.649852	0.683718	1.13884	1.92409	1.97517	-0.208758	-0.0971947	-0.639742	0.050499	-0.483105	0.63154	1.19254	0.682847	0.967787	0.1587	-1.52077	-1.36572	-0.959219	-1.42665	-1.47544	0.000212336	NM_134114	RefSeq	Mus musculus SFT2 domain containing 1 (Sft2d1), mRNA.	FALSE	GO:0006810 // GO:0015031	transport // protein transport	GO:0016020 // GO:0016021	membrane // integral to membrane	---	---	---	---
10395049	1681	Rnaseh1	-0.411598	-0.32436	-0.485468	-0.33257	-0.11684	0.761597	1.01596	1.89931	2.30405	1.68634	-0.479603	-0.913694	-0.850088	-0.213165	-0.0459845	0.547278	0.419957	0.529199	0.045582	0.391222	-1.45578	-1.75801	-0.229619	-1.08457	-0.899147	0.000213798	NM_011275	RefSeq	Mus musculus ribonuclease H1 (Rnaseh1), mRNA.	FALSE	---	---	GO:0005737 // GO:0005739	cytoplasm // mitochondrion	GO:0000287 // GO:0003676 // GO:0004518 // GO:0004519 // GO:0004523 // GO:0016787 // GO:0046872	magnesium ion binding // nucleic acid binding // nuclease activity // endonuclease activity // ribonuclease H activity // hydrolase activity // metal ion binding	---	---
10445112	1406	Ubd	-0.952835	-1.16655	0.0930472	-0.797252	-0.284102	0.914736	1.317	1.22756	0.868765	-0.359202	-0.905912	-1.18258	-1.50285	-0.698104	-0.618734	0.760407	1.00434	1.61364	0.439475	2.25264	0.0732258	-0.566765	-0.66071	-0.655162	-0.214076	0.000213798	NM_023137	RefSeq	Mus musculus ubiquitin D (Ubd), mRNA.	FALSE	GO:0006464 // GO:0006511	protein modification process // ubiquitin-dependent protein catabolic process	---	---	---	---	---	---
10360806	2256	Capn2	-0.378161	-0.348957	-1.08861	-0.67454	-0.701079	0.616579	0.534057	0.733073	1.19504	1.47594	-0.510348	0.72098	-1.31973	-0.540277	-1.35012	1.08986	2.19431	0.709216	0.864183	1.02335	-0.955731	-0.978891	-0.71044	-0.482085	-1.11761	0.000213818	NM_009794	RefSeq	Mus musculus calpain 2 (Capn2), mRNA.	FALSE	GO:0001824 // GO:0006508 // GO:0007520	blastocyst development // proteolysis // myoblast fusion	GO:0005622 // GO:0005737 // GO:0005886 // GO:0016020	intracellular // cytoplasm // plasma membrane // membrane	GO:0004197 // GO:0004198 // GO:0005509 // GO:0008233 // GO:0008234 // GO:0016787	cysteine-type endopeptidase activity // calcium-dependent cysteine-type endopeptidase activity // calcium ion binding // peptidase activity // cysteine-type peptidase activity // hydrolase activity	GenMAPP	Integrin-mediated_cell_adhesion_KEGG
10410877	2167	Polr3g	-1.25387	-0.0862231	-0.848604	-0.909037	-0.864989	0.633687	1.33022	1.82365	2.03529	0.894913	-0.253057	-1.2375	-1.06001	-1.19002	-1.10138	-0.180562	0.637428	0.640898	-0.458185	1.59478	0.162981	-0.186228	0.504127	-0.647146	0.0188147	0.000215976	NM_001081176	RefSeq	Mus musculus polymerase (RNA) III (DNA directed) polypeptide G (Polr3g), mRNA.	FALSE	GO:0006350	transcription	GO:0005634	nucleus	---	---	---	---
10459827	2136	8030462N17Rik	-1.63107	-0.0500242	-1.25997	-1.19911	-1.21629	1.11654	1.37841	1.88085	0.776639	1.76237	-0.00871721	-1.21814	-1.08201	-0.3587	-1.16745	-0.146317	0.591495	0.411538	0.134345	1.17656	-0.0710458	-0.437504	0.106597	0.180178	0.33084	0.000216486	DQ465971	GenBank	Mus musculus clone JFRR arkadia 2 isoform C (Akd2) mRNA, 5' UTR and partial cds.	FALSE	---	---	---	---	---	---	---	---
10344614	1637	---	-0.221425	-0.932355	-0.656659	-0.0821358	-0.524187	0.852845	0.875464	0.899599	1.37846	1.27989	-0.176246	-0.911825	-0.504011	0.53873	0.52465	0.64079	1.388	0.657344	0.742362	1.06016	-0.611563	-1.11998	-1.96655	-1.52694	-1.6044	0.000216486	GENSCAN00000037374	ENSEMBL	cdna:Genscan chromosome:NCBIM37:1:3018707:3044814:1	FALSE	---	---	---	---	---	---	---	---
10605018	1445	Xlr5a	-0.535997	0.483844	-0.293305	-0.0835295	0.0552433	0.329831	0.980528	0.832486	0.92075	1.18183	-1.1188	-0.80052	0.21549	-0.0175094	-0.384539	0.859167	1.49275	0.984937	0.996825	1.2355	-1.3141	-1.42758	-1.67975	-1.44809	-1.46546	0.000216486	NM_001045539	RefSeq	Mus musculus X-linked lymphocyte-regulated 5A (Xlr5a), mRNA.	FALSE	---	---	---	---	---	---	---	---
10545255	1290	Rpia	0.156567	-1.17389	0.146899	-0.98578	0.0230795	1.31847	1.617	1.1219	0.76409	1.0485	-1.64564	-0.254855	-1.1436	-1.0549	-1.38241	0.393839	-0.315299	0.384082	0.0543506	0.955109	-1.65278	-0.324186	0.950459	-0.408137	1.40713	0.000216486	NM_009075	RefSeq	Mus musculus ribose 5-phosphate isomerase A (Rpia), mRNA.	FALSE	GO:0008150 // GO:0009052	biological_process // pentose-phosphate shunt, non-oxidative branch	GO:0005575	cellular_component	GO:0004751 // GO:0016853	ribose-5-phosphate isomerase activity // isomerase activity	GenMAPP	Pentose_Phosphate_Pathway
10448631	1218	Tsc2	-1.45516	-0.99539	-0.125506	-1.30107	-0.918879	1.2689	1.29215	2.23777	0.871569	1.09555	-0.260335	-0.48952	-1.15339	-0.195308	-1.82829	-0.113033	0.28293	0.636243	1.15515	0.575327	0.315529	0.101428	-0.779098	-0.399969	0.182412	0.000216486	NM_011647	RefSeq	Mus musculus tuberous sclerosis 2 (Tsc2), transcript variant 1, mRNA.	FALSE	GO:0001843 // GO:0006469 // GO:0006606 // GO:0007049 // GO:0007507 // GO:0008104 // GO:0008285 // GO:0008285 // GO:0014065 // GO:0014067 // GO:0030030 // GO:0030100 // GO:0043491 // GO:0043491 // GO:0043547 // GO:0045786 // GO:0045792 // GO:0046626 // GO:0048009 // GO:0048009 // GO:0050918 // GO:0051056 // GO:0051898 // GO:0051898	neural tube closure // negative regulation of protein kinase activity // protein import into nucleus // cell cycle // heart development // protein localization // negative regulation of cell proliferation // negative regulation of cell proliferation // phosphoinositide 3-kinase cascade // negative regulation of phosphoinositide 3-kinase cascade // cell projection organization // regulation of end…	GO:0005622 // GO:0005634 // GO:0005737 // GO:0016020	intracellular // nucleus // cytoplasm // membrane	GO:0005096 // GO:0005102 // GO:0005515	GTPase activator activity // receptor binding // protein binding	---	---
10601980	605	Mum1l1	0.379937	1.28503	1.30294	0.235373	-0.0507306	-0.843213	-0.407374	-1.10858	-1.46393	-1.57908	0.467377	0.506118	1.0619	-0.00646826	1.46547	-0.428212	-1.37751	-0.0974459	-1.31987	-1.52917	0.343687	1.39202	0.714323	1.10333	-0.0459039	0.000216486	NM_175541	RefSeq	Mus musculus melanoma associated antigen (mutated) 1-like 1 (Mum1l1), mRNA.	FALSE	---	---	---	---	---	---	---	---
10497689	428	Gnb4	-0.169918	-0.0370843	1.09959	0.0125172	0.0432599	-1.61083	-1.11325	-1.16393	-1.71081	-1.95758	0.884749	1.05756	0.682619	0.378397	0.400641	0.0459562	-0.00049553	-0.26321	-0.450426	-1.38444	1.39246	1.03997	0.518091	1.17371	1.13246	0.000216486	NM_013531	RefSeq	Mus musculus guanine nucleotide binding protein (G protein), beta 4 (Gnb4), mRNA.	FALSE	GO:0007165 // GO:0007186	signal transduction // G-protein coupled receptor protein signaling pathway	GO:0005834	heterotrimeric G-protein complex	GO:0003924 // GO:0004871	GTPase activity // signal transducer activity	GenMAPP // GenMAPP // GenMAPP	G_Protein_Signaling // Calcium_regulation_in_cardiac_cells // Smooth_muscle_contraction
10591960	282	Vps26b	-0.163466	0.977525	0.337864	0.743206	-0.0543395	-1.6403	-1.24611	-0.580831	-0.44844	-0.11766	0.79234	0.458281	1.3594	1.09375	0.786825	-0.650823	-1.96632	-0.830082	-1.46152	-1.55898	0.810611	0.799085	0.832063	0.976058	0.751854	0.000216486	NM_178027	RefSeq	Mus musculus vacuolar protein sorting 26 homolog B (yeast) (Vps26b), mRNA.	FALSE	GO:0006810 // GO:0007034 // GO:0015031	transport // vacuolar transport // protein transport	GO:0005737 // GO:0016020 // GO:0030904	cytoplasm // membrane // retromer complex	---	---	---	---
10409767	336	Golm1	0.460229	1.47377	0.89524	0.759111	0.684901	-1.27151	-0.919174	-0.145634	-0.924945	-1.85956	1.76142	0.0669461	0.332495	1.09847	0.839785	-1.43218	-1.59716	-0.23377	-0.0592671	-0.677128	1.11646	0.847239	-0.679443	0.0103215	-0.546603	0.000217129	NM_027307	RefSeq	Mus musculus golgi membrane protein 1 (Golm1), transcript variant 1, mRNA.	FALSE	GO:0008150	biological_process	GO:0005794 // GO:0016020 // GO:0016021	Golgi apparatus // membrane // integral to membrane	GO:0003674	molecular_function	---	---
10592237	1706	Ei24	-0.996503	-0.268591	-0.800511	-1.09058	-1.14476	0.0276103	0.447621	1.43168	2.06439	2.09661	-0.139039	-0.593432	-0.636239	-0.746133	-0.39428	0.573077	1.04739	0.693226	0.423419	1.29445	0.358314	-0.722005	-1.27081	-0.862656	-0.792256	0.000217751	NM_007915	RefSeq	Mus musculus etoposide induced 2.4 mRNA (Ei24), mRNA.	FALSE	GO:0006917 // GO:0006917 // GO:0030308 // GO:0042493	induction of apoptosis // induction of apoptosis // negative regulation of cell growth // response to drug	GO:0005575 // GO:0016020 // GO:0016021	cellular_component // membrane // integral to membrane	GO:0003674	molecular_function	---	---
10347583	754	Des	-0.133176	1.99577	1.42283	0.441014	0.692809	-0.727635	-0.766934	-0.127432	-1.0588	-1.59091	1.48788	-0.0518639	1.51422	0.434273	1.21451	-1.61466	-0.993448	-0.560705	-0.937668	-0.942992	-0.159027	-0.0874923	-0.33512	0.695244	0.189313	0.000217751	NM_010043	RefSeq	Mus musculus desmin (Des), mRNA.	FALSE	GO:0007517	muscle development	GO:0005622 // GO:0005626 // GO:0005737 // GO:0005856 // GO:0005882 // GO:0030018 // GO:0030018 // GO:0042383 // GO:0043292 // GO:0045202	intracellular // insoluble fraction // cytoplasm // cytoskeleton // intermediate filament // Z disc // Z disc // sarcolemma // contractile fiber // synapse	GO:0005198 // GO:0005200 // GO:0005515	structural molecule activity // structural constituent of cytoskeleton // protein binding	GenMAPP	Striated_muscle_contraction
10401805	456	Snw1	0.834194	0.714401	1.66184	1.20371	0.500942	-1.02069	-0.295056	-1.58842	-0.580591	-1.22253	0.176992	0.282751	1.73859	-0.670077	0.685088	-0.714696	-1.07179	-1.06523	-0.831328	-1.63148	0.514316	0.736401	1.27701	0.451875	-0.0862304	0.000217751	NM_025507	RefSeq	Mus musculus SNW domain containing 1 (Snw1), mRNA.	FALSE	GO:0000398 // GO:0006397 // GO:0008380 // GO:0045944	nuclear mRNA splicing, via spliceosome // mRNA processing // RNA splicing // positive regulation of transcription from RNA polymerase II promoter	GO:0005634 // GO:0005681	nucleus // spliceosome	GO:0003713 // GO:0005515 // GO:0042809	transcription coactivator activity // protein binding // vitamin D receptor binding	---	---
10523822	1114	Brdt	0.587518	1.0791	1.18006	0.696258	0.409491	-1.35914	-0.398263	-0.802539	-1.62345	-0.295334	1.81895	-0.189497	1.75861	0.898154	1.48393	-0.284262	-0.933137	-1.24825	0.106099	-0.635191	0.259461	-0.685875	-0.186117	-0.189497	-1.44707	0.000217892	NM_054054	RefSeq	Mus musculus bromodomain, testis-specific (Brdt), transcript variant 1, mRNA.	FALSE	GO:0006338 // GO:0006350 // GO:0006355	chromatin remodeling // transcription // regulation of transcription, DNA-dependent	GO:0005634	nucleus	GO:0042393	histone binding	---	---
10485388	443	Ldlrad3	0.685584	0.619483	0.688397	0.525236	0.621628	-0.787656	-0.536913	-1.52315	-1.30141	-1.27286	1.44256	0.627726	0.471799	0.580415	-0.208595	-0.657931	-1.98135	-0.419841	-0.0491043	-1.93597	0.892527	0.926337	0.601747	1.2245	0.766845	0.000217892	NM_178886	RefSeq	Mus musculus low density lipoprotein receptor class A domain containing 3 (Ldlrad3), mRNA.	FALSE	---	---	GO:0016020 // GO:0016021	membrane // integral to membrane	GO:0004872	receptor activity	---	---
10407072	2164	Elovl7	-1.82046	-0.913112	-0.859992	-1.09914	-0.924192	1.09647	1.51537	1.79154	1.17778	0.723312	-0.805086	-1.53471	-0.977136	-0.659074	0.801223	0.404184	0.495092	0.79686	0.260613	1.28601	0.312271	-0.474847	-0.538359	0.0666808	-0.12129	0.000218382	NM_029001	RefSeq	Mus musculus ELOVL family member 7, elongation of long chain fatty acids (yeast) (Elovl7), mRNA.	FALSE	GO:0006633 // GO:0008610	fatty acid biosynthetic process // lipid biosynthetic process	GO:0005783 // GO:0016020 // GO:0016021	endoplasmic reticulum // membrane // integral to membrane	---	---	---	---
10420439	1451	Zdhhc20	0.844956	-0.841486	-0.59842	-0.254973	0.00118747	0.352378	1.27285	1.20527	1.07214	0.77333	-0.50054	-0.221937	-0.634904	-0.324117	-0.651214	0.852765	1.6033	1.07942	0.544833	0.885476	-0.204051	-1.42857	-2.18012	-1.10666	-1.5409	0.000220349	NM_029492	RefSeq	Mus musculus zinc finger, DHHC domain containing 20 (Zdhhc20), mRNA.	FALSE	---	---	GO:0016020 // GO:0016021	membrane // integral to membrane	GO:0008270 // GO:0008415 // GO:0016740 // GO:0046872	zinc ion binding // acyltransferase activity // transferase activity // metal ion binding	---	---
10404975	1563	Id4	-0.389107	-0.893982	-0.491351	-0.424565	-0.487582	0.843573	1.4271	1.49076	1.30393	0.87495	-0.776345	-1.30639	-0.381358	-0.378443	0.600756	0.355415	0.378026	1.09247	0.632006	1.9876	-1.01205	-1.22395	-1.05387	-1.39985	-0.767751	0.000221119	NM_031166	RefSeq	Mus musculus inhibitor of DNA binding 4 (Id4), mRNA.	FALSE	GO:0000082 // GO:0007405 // GO:0007420 // GO:0008283 // GO:0008284 // GO:0021766 // GO:0021895 // GO:0045449 // GO:0045665 // GO:0048712	G1/S transition of mitotic cell cycle // neuroblast proliferation // brain development // cell proliferation // positive regulation of cell proliferation // hippocampus development // cerebral cortex neuron differentiation // regulation of transcription // negative regulation of neuron differentiation // negative regulation of astrocyte differentiation	GO:0005634	nucleus	GO:0005515 // GO:0030528	protein binding // transcription regulator activity	---	---
10381154	554	Cnp	0.18423	1.06682	0.25706	0.273269	0.186593	-0.944842	-0.716955	-0.768499	-1.61075	-1.80316	2.04977	0.468883	-0.0517788	0.877711	1.10481	-0.461727	-0.363429	-0.430729	-0.773518	-1.40317	1.83344	0.224992	-0.785725	0.855817	0.730885	0.000222701	NM_009923	RefSeq	Mus musculus 2',3'-cyclic nucleotide 3' phosphodiesterase (Cnp), mRNA.	FALSE	GO:0007409 // GO:0008344 // GO:0009214	axonogenesis // adult locomotory behavior // cyclic nucleotide catabolic process	GO:0005624 // GO:0016020	membrane fraction // membrane	GO:0004113 // GO:0016787	2',3'-cyclic-nucleotide 3'-phosphodiesterase activity // hydrolase activity	---	---
10393222	548	Srp68	-0.0789446	1.01111	0.334854	-0.462254	0.183517	-0.875802	-0.881536	-0.371975	-0.977795	-1.30181	1.50698	0.460021	0.537212	0.285988	0.962102	-0.865036	-1.25186	-0.887763	-0.807405	-1.91791	1.16366	0.719149	0.995616	1.97714	0.542752	0.000223483	NM_146032	RefSeq	Mus musculus signal recognition particle 68 (Srp68), mRNA.	FALSE	---	---	GO:0005634 // GO:0005730 // GO:0005737 // GO:0005786 // GO:0030529	nucleus // nucleolus // cytoplasm // signal recognition particle, endoplasmic reticulum targeting // ribonucleoprotein complex	GO:0003723	RNA binding	GenMAPP	mRNA_processing_binding_Reactome
10606163	1438	4930519F16Rik	0.454957	-0.564421	-0.171305	-0.0899417	0.102683	1.04991	0.718428	0.959528	0.651943	0.914681	-0.422729	-0.175908	0.157678	0.386198	-0.131642	0.597816	0.822191	1.49746	0.71323	0.679034	-1.32556	-1.63151	-0.868278	-2.63965	-1.68479	0.000224625	BC107248	GenBank	Mus musculus RIKEN cDNA 4930519F16 gene, mRNA (cDNA clone MGC:130187 IMAGE:40052342), complete cds.	FALSE	---	---	---	---	GO:0008233	peptidase activity	---	---
10430555	1184	Dmc1	0.551678	0.970531	1.30596	0.886564	1.06339	-0.117785	0.242426	0.0724389	-1.27278	-1.0518	1.19697	0.120971	0.870061	0.64736	1.42711	-1.27649	-2.0959	-0.288755	-0.795862	-1.04998	0.49702	-0.338445	-1.50281	0.744864	-0.806739	0.000225312	NM_010059	RefSeq	Mus musculus DMC1 dosage suppressor of mck1 homolog, meiosis-specific homologous recombination (yeast) (Dmc1), mRNA.	FALSE	GO:0000239 // GO:0001541 // GO:0001556 // GO:0006259 // GO:0007049 // GO:0007126 // GO:0007131 // GO:0007141 // GO:0007276 // GO:0007283 // GO:0007286	pachytene // ovarian follicle development // oocyte maturation // DNA metabolic process // cell cycle // meiosis // reciprocal meiotic recombination // male meiosis I // gamete generation // spermatogenesis // spermatid development	GO:0000794 // GO:0005622 // GO:0005634	condensed nuclear chromosome // intracellular // nucleus	GO:0000166 // GO:0003677 // GO:0005524 // GO:0008094 // GO:0017111 // GO:0043565	nucleotide binding // DNA binding // ATP binding // DNA-dependent ATPase activity // nucleoside-triphosphatase activity // sequence-specific DNA binding	GenMAPP	Ovarian_Infertility_Genes
10522573	1040	D5Ertd577e	1.47198	0.43849	1.2564	2.08448	1.18328	-0.616183	-0.546554	-1.10121	-0.595898	-0.312103	-0.610363	0.797673	1.5716	0.858044	0.792558	-0.671441	-0.202211	-0.497983	-1.4696	-0.873047	0.225706	-0.00495773	-1.23328	-0.924251	-1.02113	0.000227669	NM_177187	RefSeq	Mus musculus DNA segment, Chr 5, ERATO Doi 577, expressed (D5Ertd577e), mRNA.	FALSE	GO:0008150	biological_process	GO:0005575	cellular_component	GO:0003674	molecular_function	---	---
10536021	1039	D5Ertd577e	1.47198	0.43849	1.2564	2.08448	1.18328	-0.616183	-0.546554	-1.10121	-0.595898	-0.312103	-0.610363	0.797673	1.5716	0.858044	0.792558	-0.671441	-0.202211	-0.497983	-1.4696	-0.873047	0.225706	-0.00495773	-1.23328	-0.924251	-1.02113	0.000227669	NM_177187	RefSeq	Mus musculus DNA segment, Chr 5, ERATO Doi 577, expressed (D5Ertd577e), mRNA.	FALSE	GO:0008150	biological_process	GO:0005575	cellular_component	GO:0003674	molecular_function	---	---
10524983	1172	Med13l	0.249797	1.11165	0.684803	0.56029	0.519346	0.198621	-0.165829	-0.0389684	-0.294404	-0.263018	1.73079	1.25208	1.15051	1.6237	0.63943	-0.77172	-1.03286	-0.21644	-0.809212	-0.818593	0.629687	-1.09462	-1.74923	-1.62541	-1.47039	0.000233369	NM_172424	RefSeq	Mus musculus mediator complex subunit 13-like (Med13l), mRNA.	FALSE	GO:0006350 // GO:0006355 // GO:0006366	transcription // regulation of transcription, DNA-dependent // transcription from RNA polymerase II promoter	GO:0000119 // GO:0005634	mediator complex // nucleus	---	---	---	---
10514699	974	B020004J07Rik	1.66671	0.678741	0.977788	1.43369	1.15147	-0.558806	-0.387348	-0.402929	-0.374648	-0.266991	-0.626697	1.16117	1.93447	0.746879	1.14475	-0.569258	-0.38893	-0.603257	-0.547854	-0.404308	-0.905134	-1.13491	-0.953225	-1.18943	-1.58196	0.000233369	NM_001033790	RefSeq	Mus musculus RIKEN cDNA B020004J07 gene (B020004J07Rik), mRNA.	FALSE	---	---	---	---	---	---	---	---
10405727	2010	2410127L17Rik	-0.363649	-1.42721	-0.042779	-0.726817	-1.40821	0.043561	0.74914	1.23464	1.47644	1.03835	-1.46736	-1.67699	-0.434435	-0.726817	-0.564322	0.316582	1.21739	1.13557	-0.0250817	1.82645	-0.252917	-0.56311	0.919415	-0.637891	0.360046	0.000234226	NM_026120	RefSeq	Mus musculus RIKEN cDNA 2410127L17 gene (2410127L17Rik), mRNA.	FALSE	---	---	---	---	---	---	---	---
10412481	2009	2410127L17Rik	-0.363649	-1.42721	-0.042779	-0.726817	-1.40821	0.043561	0.74914	1.23464	1.47644	1.03835	-1.46736	-1.67699	-0.434435	-0.726817	-0.564322	0.316582	1.21739	1.13557	-0.0250817	1.82645	-0.252917	-0.56311	0.919415	-0.637891	0.360046	0.000234226	NM_026120	RefSeq	Mus musculus RIKEN cDNA 2410127L17 gene (2410127L17Rik), mRNA.	FALSE	---	---	---	---	---	---	---	---
10592266	1162	Slc37a2	0.894247	-0.115382	1.29619	0.724647	1.07937	-0.129725	-0.419568	-1.03018	-0.808343	-1.17304	1.06749	0.991941	1.03174	1.74199	1.30983	-0.164758	-1.6982	-0.0510593	-0.00642611	0.146507	-0.339652	-0.391514	-1.47312	-0.978273	-1.5047	0.000234226	NM_020258	RefSeq	Mus musculus solute carrier family 37 (glycerol-3-phosphate transporter), member 2 (Slc37a2), mRNA.	FALSE	GO:0006072 // GO:0006127 // GO:0006810 // GO:0008643 // GO:0015794	glycerol-3-phosphate metabolic process // glycerophosphate shuttle // transport // carbohydrate transport // glycerol-3-phosphate transport	GO:0016020 // GO:0016021	membrane // integral to membrane	GO:0005215 // GO:0005351 // GO:0015169	transporter activity // sugar:hydrogen symporter activity // glycerol-3-phosphate transmembrane transporter activity	---	---
10462096	973	---	1.43046	0.50393	1.25717	1.56079	1.16958	-0.702058	-0.359131	-1.27801	-0.332045	-0.275411	-0.441619	1.24774	2.01172	0.683886	0.995534	-0.403186	-0.342941	-0.511133	-0.379351	-0.785656	-0.807889	-0.736595	-1.20001	-1.25357	-1.0522	0.00023802	GENSCAN00000042249	ENSEMBL	cdna:Genscan chromosome:NCBIM37:19:23741115:23741953:1	FALSE	---	---	---	---	---	---	---	---
10373521	2320	Rab5b	-1.07531	-0.800706	-0.418418	-0.507804	-1.16812	0.532286	0.93899	2.13702	0.337641	0.935844	-1.32942	-0.969553	-0.076138	-1.18922	0.533399	0.840834	0.949367	0.849514	0.737451	1.80039	0.268143	-0.804367	-1.08872	-1.05211	-0.380982	0.000241488	NM_177411	RefSeq	Mus musculus RAB5B, member RAS oncogene family (Rab5b), mRNA.	FALSE	GO:0006810 // GO:0007032 // GO:0007264 // GO:0015031 // GO:0030100	transport // endosome organization // small GTPase mediated signal transduction // protein transport // regulation of endocytosis	GO:0005768 // GO:0005886 // GO:0016020 // GO:0030139	endosome // plasma membrane // membrane // endocytic vesicle	GO:0000166 // GO:0003924 // GO:0005525	nucleotide binding // GTPase activity // GTP binding	---	---
10590586	516	Limd1	0.392599	0.129678	0.646585	0.599634	0.374178	-1.25541	-0.687399	-0.597518	-2.17773	-1.41782	0.790891	1.37786	0.382905	-0.0703397	0.509032	-0.372814	-1.04499	-0.0819108	-0.798465	-1.70419	1.15028	1.2676	1.51295	0.885596	0.188787	0.000241488	NM_013860	RefSeq	Mus musculus LIM domains containing 1 (Limd1), mRNA.	FALSE	GO:0008150	biological_process	GO:0005575	cellular_component	GO:0003674 // GO:0005515 // GO:0008270 // GO:0046872	molecular_function // protein binding // zinc ion binding // metal ion binding	---	---
10363415	1060	Spock2	0.690064	-0.110559	0.934238	0.764169	0.85383	-0.328769	-0.331398	-1.68028	-0.828083	-1.48494	1.4252	-0.0148279	1.45957	1.23372	1.59311	-0.60249	-2.03567	-0.19555	-0.534371	-1.08699	0.713137	0.0863343	-0.741868	0.296286	-0.0738599	0.000244499	NM_052994	RefSeq	Mus musculus sparc/osteonectin, cwcv and kazal-like domains proteoglycan 2 (Spock2), mRNA.	FALSE	GO:0010811 // GO:0019800 // GO:0030198	positive regulation of cell-substrate adhesion // peptide cross-linking via chondroitin 4-sulfate glycosaminoglycan // extracellular matrix organization	GO:0005576 // GO:0005578	extracellular region // proteinaceous extracellular matrix	GO:0005509 // GO:0005539 // GO:0050840	calcium ion binding // glycosaminoglycan binding // extracellular matrix binding	---	---
10429387	308	Ptplb	0.91418	1.46254	0.556209	1.09735	1.64086	-0.70502	-0.201383	-0.0758974	-0.743864	-0.91982	1.38392	1.52352	0.593049	1.23843	-0.442109	-0.60292	-0.934565	0.168437	-1.36457	-1.31944	-0.192385	0.0633532	-1.43147	-0.588176	-1.12023	0.000244499	BC131899	GenBank	Mus musculus protein tyrosine phosphatase-like (proline instead of catalytic arginine), member b, mRNA (cDNA clone MGC:163530 IMAGE:40130176), complete cds.	FALSE	GO:0008150 // GO:0016311	biological_process // dephosphorylation	GO:0005575 // GO:0005783 // GO:0016020 // GO:0016021	cellular_component // endoplasmic reticulum // membrane // integral to membrane	GO:0003674 // GO:0004725 // GO:0016791	molecular_function // protein tyrosine phosphatase activity // phosphatase activity	---	---
10366956	2318	Stat6	-0.684977	-1.58889	-0.108136	-0.948014	-1.20693	0.883082	0.593803	2.20445	0.489711	1.63654	-0.968455	-0.966187	-0.753784	-0.852124	0.156524	0.0509489	1.32529	0.810668	0.32501	1.23493	0.686004	-0.65021	-1.09594	0.0547329	-0.628044	0.00024883	NM_009284	RefSeq	Mus musculus signal transducer and activator of transcription 6 (Stat6), mRNA.	FALSE	GO:0002829 // GO:0006350 // GO:0006355 // GO:0007165 // GO:0042127 // GO:0045944 // GO:0048295	negative regulation of T-helper 2 type immune response // transcription // regulation of transcription, DNA-dependent // signal transduction // regulation of cell proliferation // positive regulation of transcription from RNA polymerase II promoter // positive regulation of isotype switching to IgE isotypes	GO:0005634 // GO:0005737	nucleus // cytoplasm	GO:0003677 // GO:0003700 // GO:0004871 // GO:0005509 // GO:0005515 // GO:0043565	DNA binding // transcription factor activity // signal transducer activity // calcium ion binding // protein binding // sequence-specific DNA binding	---	---
10483326	1815	Scn9a	-1.43049	-0.30392	-1.00182	-0.755277	0.17573	0.72701	0.839506	0.0290618	1.3014	2.13873	-0.489142	-0.619225	-0.74312	-1.19999	-1.23778	0.37337	1.37114	0.358961	1.0436	1.87533	-0.807115	0.0993709	-0.525513	-0.316926	-0.902902	0.00024883	NM_018852	RefSeq	Mus musculus sodium channel, voltage-gated, type IX, alpha (Scn9a), mRNA.	FALSE	GO:0006810 // GO:0006811 // GO:0006814 // GO:0006954 // GO:0009791 // GO:0048266	transport // ion transport // sodium ion transport // inflammatory response // post-embryonic development // behavioral response to pain	GO:0001518 // GO:0016020 // GO:0016021	voltage-gated sodium channel complex // membrane // integral to membrane	GO:0005216 // GO:0005244 // GO:0005248 // GO:0005272 // GO:0031402	ion channel activity // voltage-gated ion channel activity // voltage-gated sodium channel activity // sodium channel activity // sodium ion binding	---	---
10588192	293	Msl2	0.143317	-0.106955	0.53021	0.614355	0.95674	-1.09114	-1.30842	-0.931077	-1.30286	-0.603579	1.88478	-0.0186502	1.71429	1.27289	1.42778	-0.229854	-1.79838	-0.0815749	-0.356772	-1.43028	-0.00901868	0.310621	0.312883	-0.560552	0.661244	0.00024883	AK173208	GenBank	Mus musculus premature mRNA for mKIAA1585 protein.	FALSE	GO:0008150	biological_process	GO:0005575	cellular_component	GO:0003674 // GO:0005515 // GO:0008270 // GO:0046872	molecular_function // protein binding // zinc ion binding // metal ion binding	---	---
10441646	1614	Sft2d1	-0.272489	-0.249691	-0.0993821	-0.568947	-0.413719	0.729178	0.742404	1.08811	1.84946	2.15616	-0.348579	-0.144098	-0.540377	-0.021543	-0.435618	0.588619	1.32522	0.458271	0.807349	0.148519	-1.53966	-1.40531	-1.00809	-1.4101	-1.43568	0.000249837	NM_134114	RefSeq	Mus musculus SFT2 domain containing 1 (Sft2d1), mRNA.	FALSE	GO:0006810 // GO:0015031	transport // protein transport	GO:0016020 // GO:0016021	membrane // integral to membrane	---	---	---	---
10453562	1613	Sft2d1	-0.272489	-0.249691	-0.0993821	-0.568947	-0.413719	0.729178	0.742404	1.08811	1.84946	2.15616	-0.348579	-0.144098	-0.540377	-0.021543	-0.435618	0.588619	1.32522	0.458271	0.807349	0.148519	-1.53966	-1.40531	-1.00809	-1.4101	-1.43568	0.000249837	NM_134114	RefSeq	Mus musculus SFT2 domain containing 1 (Sft2d1), mRNA.	FALSE	GO:0006810 // GO:0015031	transport // protein transport	GO:0016020 // GO:0016021	membrane // integral to membrane	---	---	---	---
10478415	1434	Wisp2	-0.583898	-0.156808	-1.07472	-0.830751	-0.715274	0.188658	-0.263941	0.90494	0.61518	0.417071	-0.961633	-0.347678	-0.743216	-0.871397	-0.684999	1.17653	2.70816	0.755862	1.6975	1.61478	-1.16151	-0.271089	-0.719748	-0.434776	-0.257252	0.000249837	NM_016873	RefSeq	Mus musculus WNT1 inducible signaling pathway protein 2 (Wisp2), mRNA.	FALSE	GO:0001558 // GO:0007155	regulation of cell growth // cell adhesion	GO:0005576 // GO:0005886	extracellular region // plasma membrane	GO:0005515 // GO:0005520 // GO:0008083	protein binding // insulin-like growth factor binding // growth factor activity	---	---
10488020	93	Txndc13	1.09215	0.151623	1.32124	1.07201	0.936564	-2.15173	-0.610657	-1.37715	-1.86901	-1.42692	0.0537617	0.516221	0.826915	0.22231	1.21315	0.136787	-0.950013	-0.327614	-0.892793	-0.524683	1.12077	0.705181	0.376404	0.0533778	0.332113	0.000250534	NM_029148	RefSeq	Mus musculus thioredoxin domain containing 13 (Txndc13), mRNA.	FALSE	GO:0006810 // GO:0022900 // GO:0045454	transport // electron transport chain // cell redox homeostasis	GO:0016020 // GO:0016021	membrane // integral to membrane	---	---	---	---
10454103	1657	---	-0.47721	-1.09304	-1.02318	-0.491012	-0.659641	0.804804	1.04246	0.897376	1.82286	1.35442	-0.344203	-1.30801	-0.683259	0.207224	0.412108	0.176085	1.60874	0.475371	0.844712	1.17384	-0.0819027	-0.902014	-1.38413	-0.90181	-1.47058	0.000253534	GENSCAN00000048638	ENSEMBL	cdna:Genscan chromosome:NCBIM37:18:18988956:18989376:1	FALSE	---	---	---	---	---	---	---	---
10424349	641	Sqle	0.0105718	-0.0150164	0.252786	0.23852	0.438426	-0.977108	-0.483026	-0.702101	-1.57267	-1.1243	0.130312	0.644968	0.0795908	-0.0364383	0.824315	-0.361255	-1.36736	-0.71889	-0.51104	-1.83029	0.738316	1.39344	1.49553	2.13627	1.31646	0.000254721	NM_009270	RefSeq	Mus musculus squalene epoxidase (Sqle), mRNA.	FALSE	GO:0008152 // GO:0055114	metabolic process // oxidation reduction	GO:0005783 // GO:0005792 // GO:0016020 // GO:0016021	endoplasmic reticulum // microsome // membrane // integral to membrane	GO:0004506 // GO:0016491 // GO:0050660	squalene monooxygenase activity // oxidoreductase activity // FAD binding	---	---
10566281	271	Dnajc19	0.619655	1.23405	0.621864	1.79381	1.03899	-0.0368524	0.0531703	-0.0514616	-0.607761	-0.26794	0.701585	0.10722	0.721686	1.07134	-0.612904	-0.900245	-2.23774	-1.21067	-1.88277	-1.04379	-0.197252	0.983768	-0.0514616	0.935363	-0.781664	0.000254721	ENSMUST00000108195	ENSEMBL	Isoform 1 of Mitochondrial import inner membrane translocase subunit TIM14 gene:ENSMUSG00000027679	FALSE	GO:0006810 // GO:0015031 // GO:0065002	transport // protein transport // intracellular protein transmembrane transport	GO:0005739 // GO:0005743 // GO:0016020 // GO:0016021	mitochondrion // mitochondrial inner membrane // membrane // integral to membrane	GO:0031072	heat shock protein binding	---	---
10515378	1952	Hpdl	-0.563456	-0.96306	-0.627701	-1.09148	-0.518442	1.04458	0.420651	2.25908	1.40998	1.66338	-0.282861	-1.10463	-1.39201	-1.14804	-1.38765	-0.268811	0.476297	0.411444	-0.587156	1.33107	-0.357038	0.107838	0.113663	0.538773	0.51558	0.000257177	NM_146256	RefSeq	Mus musculus 4-hydroxyphenylpyruvate dioxygenase-like (Hpdl), mRNA.	FALSE	GO:0009072	aromatic amino acid family metabolic process	---	---	GO:0003868 // GO:0016702	4-hydroxyphenylpyruvate dioxygenase activity // oxidoreductase activity, acting on single donors with incorporation of molecular oxygen, incorporation of two atoms of oxygen	---	---
10425226	1895	Eif3l	-0.317545	-0.326392	-0.0816773	0.377015	-0.394092	0.670424	0.699981	1.17283	1.90212	2.04414	-0.167137	-0.561276	-1.48141	-1.10982	-2.26576	0.722591	0.46549	0.953805	0.477746	0.441241	-0.274225	-0.938834	-0.559048	-0.522741	-0.927431	0.000258255	NM_145139	RefSeq	Mus musculus eukaryotic translation initiation factor 3, subunit E interacting protein (Eif3eip), mRNA.	FALSE	GO:0006412	translation	GO:0001650 // GO:0005654 // GO:0005730	fibrillar center // nucleoplasm // nucleolus	GO:0005515	protein binding	---	---
10372457	2045	Tbc1d15	-1.01036	-0.295403	-0.659788	-0.919984	-0.556607	0.3871	0.702439	1.05072	1.2585	0.980268	-1.49637	-1.17745	-0.670163	-2.45533	0.0397261	-0.2107	0.750628	1.23541	0.881781	1.63827	0.744018	0.396885	0.149309	-0.757998	-0.00489648	0.000259411	NM_025706	RefSeq	Mus musculus TBC1 domain family, member 15 (Tbc1d15), mRNA.	FALSE	GO:0032313	regulation of Rab GTPase activity	GO:0005622 // GO:0005739	intracellular // mitochondrion	GO:0005096 // GO:0005097	GTPase activator activity // Rab GTPase activator activity	---	---
10536155	1032	EG665802	1.26217	0.59083	1.36483	2.04084	1.34298	-0.588767	-0.621752	-1.14082	-0.544974	-0.35257	-0.734105	0.719166	1.55873	0.632993	1.13885	-0.437088	-0.149946	-0.707192	-1.26878	-0.994895	0.080129	-0.0863176	-1.1567	-0.861202	-1.08641	0.000259411	ENSMUST00000101023	ENSEMBL	similar to C87414 protein isoform 5 gene:ENSMUSG00000072824	FALSE	---	---	---	---	---	---	---	---
10522581	1031	D5Ertd577e	1.26217	0.59083	1.36483	2.04084	1.34298	-0.588767	-0.621752	-1.14082	-0.544974	-0.35257	-0.734105	0.719166	1.55873	0.632993	1.13885	-0.437088	-0.149946	-0.707192	-1.26878	-0.994895	0.080129	-0.0863176	-1.1567	-0.861202	-1.08641	0.000259411	NM_177187	RefSeq	Mus musculus DNA segment, Chr 5, ERATO Doi 577, expressed (D5Ertd577e), mRNA.	FALSE	GO:0008150	biological_process	GO:0005575	cellular_component	GO:0003674	molecular_function	---	---
10357249	9	Steap3	0.777168	1.36631	1.07107	0.963666	1.14261	-1.14238	-0.877405	-1.74206	-2.01188	-1.53833	0.436411	0.269354	0.693819	0.703557	0.230634	-0.153377	-1.00553	-0.296377	0.307472	-1.55532	0.790411	0.817776	0.488619	-0.121469	0.385242	0.000263743	NM_001085409	RefSeq	Mus musculus STEAP family member 3 (Steap3), transcript variant 1, mRNA.	FALSE	GO:0006810 // GO:0006811 // GO:0006826 // GO:0006915 // GO:0007049 // GO:0008152 // GO:0009306 // GO:0055114	transport // ion transport // iron ion transport // apoptosis // cell cycle // metabolic process // protein secretion // oxidation reduction	GO:0005768 // GO:0005771 // GO:0005886 // GO:0016020 // GO:0016021	endosome // multivesicular body // plasma membrane // membrane // integral to membrane	GO:0000293 // GO:0000293 // GO:0003824 // GO:0005488 // GO:0005506 // GO:0005507 // GO:0009055 // GO:0016491 // GO:0046872 // GO:0050660	ferric-chelate reductase activity // ferric-chelate reductase activity // catalytic activity // binding // iron ion binding // copper ion binding // electron carrier activity // oxidoreductase activity // metal ion binding // FAD binding	---	---
10369481	155	H2afy2	0.205274	1.47068	0.489693	-0.0115832	0.617823	-1.7843	-1.33404	-0.248358	-1.35013	-1.03024	0.0422036	0.444719	0.629007	0.503854	1.59315	-0.607118	-0.55958	-0.250451	-1.50432	-1.38203	1.69737	1.19198	0.133067	0.740193	0.303136	0.000264921	NM_207000	RefSeq	Mus musculus H2A histone family, member Y2 (H2afy2), mRNA.	FALSE	GO:0006334 // GO:0007549 // GO:0016568	nucleosome assembly // dosage compensation // chromatin modification	GO:0000786 // GO:0001740 // GO:0005634 // GO:0005694	nucleosome // Barr body // nucleus // chromosome	GO:0003677	DNA binding	---	---
10451054	37	Enpp4	0.673116	0.979148	0.873051	0.110648	0.310779	-1.43457	-1.18472	-1.01436	-1.13973	-1.63776	0.560677	-0.322262	0.13282	0.791076	1.64261	-0.414075	-1.55209	-0.30712	-1.16359	-0.10369	1.04402	0.889105	1.58656	-0.298986	0.979334	0.000265202	NM_199016	RefSeq	Mus musculus ectonucleotide pyrophosphatase/phosphodiesterase 4 (Enpp4), mRNA.	FALSE	GO:0008152	metabolic process	GO:0016020 // GO:0016021	membrane // integral to membrane	GO:0003824 // GO:0016787	catalytic activity // hydrolase activity	---	---
10605831	1547	Las1l	-0.254393	-0.367761	0.213566	-0.177668	0.165474	0.773979	0.963818	1.66942	1.50478	1.47384	-0.489509	-0.29503	0.0982849	-0.311588	0.0893226	0.558737	-0.0840828	0.606467	0.793529	0.858458	-1.81999	-1.61498	-1.08433	-1.58521	-1.68512	0.000266005	NM_152822	RefSeq	Mus musculus LAS1-like (S. cerevisiae) (Las1l), mRNA.	FALSE	---	---	---	---	---	---	---	---
10458804	1158	EG225468	0.951973	1.3547	0.559511	1.34418	0.999971	-0.605007	-0.238951	-0.270671	-0.384123	-0.643364	-0.301763	0.14682	1.96959	1.03928	2.09676	-0.82592	-0.89323	-0.877711	-1.69242	-0.763847	-0.555042	-0.734018	-0.851428	-0.444162	-0.38113	0.000267081	XM_911153	RefSeq	PREDICTED: Mus musculus predicted gene, EG225468 (EG225468), mRNA.	FALSE	---	---	---	---	---	---	---	---
10403361	2171	Pitrm1	-1.29034	-0.344196	-0.741733	-1.1219	-0.855267	0.863184	0.82159	2.05771	1.76747	1.78669	-0.655785	-1.034	-0.658288	-2.04037	-0.280534	-0.202783	-0.0278447	0.2513	0.172486	0.996515	-0.164238	0.161596	-0.147525	0.559075	0.127194	0.0002674	NM_145131	RefSeq	Mus musculus pitrilysin metallepetidase 1 (Pitrm1), mRNA.	FALSE	GO:0006508	proteolysis	GO:0005739	mitochondrion	GO:0003824 // GO:0004222 // GO:0008233 // GO:0008237 // GO:0008270 // GO:0016787 // GO:0046872	catalytic activity // metalloendopeptidase activity // peptidase activity // metallopeptidase activity // zinc ion binding // hydrolase activity // metal ion binding	---	---
10400515	1561	Sec23a	-1.0479	-0.722809	-0.720109	-1.13699	-0.718352	0.578275	0.875969	1.75836	0.315123	1.19594	0.0589933	-0.470363	-0.503209	-0.344104	0.92702	0.411995	1.00861	0.993857	1.09955	1.68184	-0.748913	-0.856224	-0.596586	-1.07825	-1.96173	0.0002674	NM_009147	RefSeq	Mus musculus SEC23A (S. cerevisiae) (Sec23a), mRNA.	FALSE	GO:0006810 // GO:0006886 // GO:0006888 // GO:0015031 // GO:0016192	transport // intracellular protein transport // ER to Golgi vesicle-mediated transport // protein transport // vesicle-mediated transport	GO:0000139 // GO:0005783 // GO:0005794 // GO:0016020 // GO:0030127 // GO:0048471	Golgi membrane // endoplasmic reticulum // Golgi apparatus // membrane // COPII vesicle coat // perinuclear region of cytoplasm	GO:0005515 // GO:0008270	protein binding // zinc ion binding	---	---
10554325	1011	5730590G19Rik	1.09311	-0.161995	1.1614	1.10932	0.853045	-1.07888	-0.945927	-0.568147	-0.251552	-0.257803	0.607821	-0.203616	1.67532	2.01198	1.52123	-0.854355	-0.814461	-0.494911	-0.649763	-0.748574	0.201211	-0.700393	-0.296432	-2.02689	-0.180747	0.000268064	NM_029835	RefSeq	Mus musculus RIKEN cDNA 5730590G19 gene (5730590G19Rik), mRNA.	FALSE	---	---	---	---	---	---	---	---
10584259	1711	Fez1	-0.577933	-0.14375	-1.05239	-0.727334	-0.723267	0.16289	0.580017	2.30154	1.50854	1.84257	-0.457707	-0.149146	-1.46456	-0.654385	-0.540453	0.383599	0.923441	0.681031	0.408796	1.52837	-0.422155	-0.786904	-0.862845	-0.834456	-0.923523	0.000271761	NM_183171	RefSeq	Mus musculus fasciculation and elongation protein zeta 1 (zygin I) (Fez1), mRNA.	FALSE	---	---	GO:0005737 // GO:0005813 // GO:0005886 // GO:0016020	cytoplasm // centrosome // plasma membrane // membrane	GO:0005515 // GO:0043015	protein binding // gamma-tubulin binding	---	---
10472408	788	Csrnp3	0.837249	0.870181	0.484806	0.349289	0.731367	0.0361828	-0.161813	-1.82212	-1.56204	-0.63676	0.342542	1.07509	0.514747	0.432682	1.55568	-2.15202	-0.734735	-0.445522	-1.3072	-1.26562	1.4214	0.297183	0.492054	0.511997	0.135376	0.000271761	NM_153409	RefSeq	Mus musculus cysteine-serine-rich nuclear protein 3 (Csrnp3), transcript variant 1, mRNA.	FALSE	GO:0006350 // GO:0006355 // GO:0006915 // GO:0043065 // GO:0045944	transcription // regulation of transcription, DNA-dependent // apoptosis // positive regulation of apoptosis // positive regulation of transcription from RNA polymerase II promoter	GO:0005634	nucleus	GO:0003677 // GO:0003700	DNA binding // transcription factor activity	---	---
10547436	2208	Wnk1	-0.979801	-0.906406	-0.349486	-1.3856	-1.19231	1.26651	1.01821	1.78408	0.839881	1.32501	-0.328583	-0.00278468	-0.012077	0.085816	-0.286232	0.226353	0.653337	1.49153	0.270456	1.04844	0.20749	-0.958499	-1.80137	-0.721756	-1.29222	0.000271828	NM_198703	RefSeq	Mus musculus WNK lysine deficient protein kinase 1 (Wnk1), mRNA.	FALSE	GO:0006468 // GO:0006811 // GO:0050794	protein amino acid phosphorylation // ion transport // regulation of cellular process	GO:0005625 // GO:0005737 // GO:0042598	soluble fraction // cytoplasm // vesicular fraction	GO:0000166 // GO:0004672 // GO:0004674 // GO:0004860 // GO:0005515 // GO:0005524 // GO:0016301 // GO:0016740	nucleotide binding // protein kinase activity // protein serine/threonine kinase activity // protein kinase inhibitor activity // protein binding // ATP binding // kinase activity // transferase activity	---	---
10559146	1953	Brsk2	-0.276833	-0.659496	-1.20982	-0.459167	-0.63326	0.969105	0.95279	2.64445	0.866175	1.4027	-0.969184	-0.824041	-1.37152	-0.841271	-1.32439	-0.454747	-0.299256	0.692881	0.322788	1.53895	-0.566183	-0.0649881	-0.116673	0.533546	0.147463	0.000275066	NM_029426	RefSeq	Mus musculus BR serine/threonine kinase 2 (Brsk2), transcript variant 1, mRNA.	FALSE	GO:0006468 // GO:0030010 // GO:0030182	protein amino acid phosphorylation // establishment of cell polarity // neuron differentiation	---	---	GO:0000166 // GO:0000287 // GO:0004672 // GO:0004674 // GO:0005524 // GO:0016301 // GO:0016740 // GO:0046872	nucleotide binding // magnesium ion binding // protein kinase activity // protein serine/threonine kinase activity // ATP binding // kinase activity // transferase activity // metal ion binding	---	---
10504056	48	Ubap1	0.24249	0.773115	1.2454	0.872653	0.754388	-1.02839	-0.217364	-0.458496	-1.14502	-2.44143	1.26527	-0.125273	1.34651	0.730236	1.45574	-0.185506	-1.53477	-0.924867	-0.287861	-1.24973	0.427959	0.682654	-0.446041	0.233838	0.0145062	0.000276144	NM_023305	RefSeq	Mus musculus ubiquitin-associated protein 1 (Ubap1), mRNA.	FALSE	GO:0008150	biological_process	GO:0005575	cellular_component	GO:0003674	molecular_function	---	---
10365933	2128	Eea1	-0.153561	-0.908463	-0.114102	-0.0763934	-0.748914	0.499988	0.621925	1.70272	1.06479	1.13583	-1.421	-0.0298166	0.199212	-0.55933	-0.522131	1.0371	1.67721	0.608719	0.388745	1.46368	-0.714381	-1.51494	-0.848455	-1.37722	-1.41122	0.000276994	NM_001001932	RefSeq	Mus musculus early endosome antigen 1 (Eea1), mRNA.	FALSE	---	---	GO:0005622 // GO:0005737 // GO:0005768 // GO:0005769 // GO:0005769 // GO:0005969 // GO:0016020	intracellular // cytoplasm // endosome // early endosome // early endosome // serine-pyruvate aminotransferase complex // membrane	GO:0008270 // GO:0046872	zinc ion binding // metal ion binding	---	---
10397553	863	LOC100039226 // LOC100045274	1.2498	0.902515	0.879477	1.28412	1.28652	-0.26798	-0.0570899	-1.02395	-0.009501	-0.11233	-0.516358	0.938059	1.39325	1.02824	1.07282	-0.459197	-0.0782024	-0.353288	-0.31491	-0.658648	-0.169251	-0.68394	-1.45451	-2.17926	-1.69638	0.000281358	ENSMUST00000095505	ENSEMBL	hypothetical protein gene:ENSMUSG00000072909	FALSE	---	---	---	---	---	---	---	---
10564539	574	Mctp2	0.994526	0.199142	0.957374	0.90336	1.26959	-0.408036	-0.359238	-1.20334	-2.1652	-1.96992	0.659201	0.622128	0.458856	0.156661	-0.0422972	-0.879641	-0.835674	-0.137696	-1.07115	-1.26163	0.587705	0.581418	0.526708	1.47667	0.940484	0.000284474	NM_001024703	RefSeq	Mus musculus multiple C2 domains, transmembrane 2 (Mctp2), mRNA.	FALSE	---	---	GO:0016020 // GO:0016021	membrane // integral to membrane	GO:0005509	calcium ion binding	---	---
10393320	501	Ube2o	0.0341322	0.298735	0.619134	0.423812	0.132877	-0.810645	-0.313541	-0.694697	-1.35647	-0.424616	1.48456	0.494965	0.756117	0.723986	0.8605	-0.795451	-2.15335	-0.553405	-1.06786	-2.03613	1.41913	0.743387	0.0841176	0.865717	1.265	0.000284474	NM_173755	RefSeq	Mus musculus ubiquitin-conjugating enzyme E2O (Ube2o), mRNA.	FALSE	GO:0006511 // GO:0043687 // GO:0051246	ubiquitin-dependent protein catabolic process // post-translational protein modification // regulation of protein metabolic process	---	---	GO:0004842 // GO:0016874 // GO:0019787	ubiquitin-protein ligase activity // ligase activity // small conjugating protein ligase activity	---	---
10491780	427	Hspa4l	0.161873	-0.491595	0.961166	0.271407	0.125634	-1.70885	-1.29879	-1.82426	-1.4509	-1.38388	0.653512	1.39254	0.858815	0.656684	0.574298	0.208572	0.596682	-0.586164	-0.575259	-1.25539	0.844544	0.604729	0.664812	1.6033	0.396528	0.000288287	NM_011020	RefSeq	Mus musculus heat shock protein 4 like (Hspa4l), mRNA.	FALSE	GO:0006950	response to stress	GO:0005634 // GO:0005737	nucleus // cytoplasm	GO:0000166 // GO:0005524	nucleotide binding // ATP binding	---	---
10391013	2276	Krt13	-0.817481	-0.501635	-0.791395	-0.439948	-0.741448	0.422385	0.307426	-0.0060539	2.49496	2.2448	-0.702686	-0.883163	-0.762584	-0.659295	-0.671778	1.11885	1.19553	0.679859	0.581253	1.2196	-1.00874	-0.778501	-0.659295	-0.581758	-0.258903	0.000290079	NM_010662	RefSeq	Mus musculus keratin 13 (Krt13), mRNA.	FALSE	---	---	GO:0005882	intermediate filament	GO:0005198 // GO:0005515	structural molecule activity // protein binding	---	---
10390175	1740	Ngfr	0.351511	-1.00485	-0.489363	-0.111016	-0.14921	0.385252	0.136192	0.51428	1.62116	1.38646	-0.265021	-0.0635582	-0.725556	-0.372986	-0.48829	1.40965	1.3289	0.702719	1.05461	1.34356	-1.53142	-1.16945	-1.34039	-1.88428	-0.63889	0.000290869	NM_033217	RefSeq	Mus musculus nerve growth factor receptor (TNFR superfamily, member 16) (Ngfr), mRNA.	FALSE	GO:0006915 // GO:0006917 // GO:0007165 // GO:0007275 // GO:0007399 // GO:0007411 // GO:0007417 // GO:0010468 // GO:0016048 // GO:0021675 // GO:0030154 // GO:0031069 // GO:0040037 // GO:0042488 // GO:0043588 // GO:0048146 // GO:0051799	apoptosis // induction of apoptosis // signal transduction // multicellular organismal development // nervous system development // axon guidance // central nervous system development // regulation of gene expression // detection of temperature stimulus // nerve development // cell differentiation // hair follicle morphogenesis // negative regulation of fibroblast growth factor receptor signaling…	GO:0005886 // GO:0016020 // GO:0016021	plasma membrane // membrane // integral to membrane	GO:0004872 // GO:0005035 // GO:0005515 // GO:0048406	receptor activity // death receptor activity // protein binding // nerve growth factor binding	GenMAPP	Apoptosis_KEGG
10585484	147	Chrna5	0.0485043	-0.00825232	0.505391	0.140293	0.0108467	-1.37014	-0.567511	-0.898358	-1.44405	-0.499319	0.427216	0.565173	0.688283	0.766095	1.40208	-0.537574	-1.69954	0.0690965	-1.21109	-1.44973	2.22408	1.60273	0.593972	0.202038	0.439774	0.000291037	NM_176844	RefSeq	Mus musculus cholinergic receptor, nicotinic, alpha polypeptide 5 (Chrna5), mRNA.	FALSE	GO:0006810 // GO:0006811 // GO:0035094	transport // ion transport // response to nicotine	GO:0005886 // GO:0005892 // GO:0016020 // GO:0016021 // GO:0030054 // GO:0045202 // GO:0045211	plasma membrane // nicotinic acetylcholine-gated receptor-channel complex // membrane // integral to membrane // cell junction // synapse // postsynaptic membrane	GO:0004872 // GO:0004889 // GO:0005216 // GO:0005230 // GO:0030594	receptor activity // nicotinic acetylcholine-activated cation-selective channel activity // ion channel activity // extracellular ligand-gated ion channel activity // neurotransmitter receptor activity	---	---
10355567	1423	Tmbim1	-0.808077	-0.161833	-0.339969	-0.670853	-0.911458	0.0555651	0.091246	0.970855	0.59159	1.44458	-0.21278	0.323153	-0.516968	-0.139956	-0.725061	1.55253	2.30753	0.93755	0.96382	0.966842	-0.956231	-1.72355	-1.29078	-0.786761	-0.960993	0.000291119	NM_027154	RefSeq	Mus musculus transmembrane BAX inhibitor motif containing 1 (Tmbim1), mRNA.	FALSE	GO:0008150	biological_process	GO:0016020 // GO:0016021	membrane // integral to membrane	GO:0003674	molecular_function	---	---
10347277	1185	Igfbp2	0.367861	1.62673	1.16706	0.660016	0.537439	-0.307325	0.0316159	-0.184793	-1.38178	-1.35215	1.0416	0.25415	1.2965	1.04797	1.98176	-0.689617	-1.91868	-0.434188	-0.653518	-0.482369	-0.112322	-1.06618	-0.876821	0.131213	-0.684173	0.000291119	NM_008342	RefSeq	Mus musculus insulin-like growth factor binding protein 2 (Igfbp2), mRNA.	FALSE	GO:0001558	regulation of cell growth	GO:0005576 // GO:0005615	extracellular region // extracellular space	GO:0005520 // GO:0019838	insulin-like growth factor binding // growth factor binding	GenMAPP	Smooth_muscle_contraction
10546092	1742	Rab7	0.0425907	-0.355317	-0.515328	-0.24181	0.544215	0.530774	0.33193	1.21406	1.27527	0.9789	-0.180345	-0.0640554	-0.665299	-0.0807415	-0.671327	0.762526	0.712809	0.458997	1.50059	0.990942	-3.23481	-0.893718	-0.942628	-0.579757	-0.918457	0.000293953	BC086793	GenBank	Mus musculus RAB7, member RAS oncogene family, mRNA (cDNA clone MGC:102153 IMAGE:6414012), complete cds.	FALSE	GO:0006810 // GO:0006886 // GO:0007264 // GO:0015031	transport // intracellular protein transport // small GTPase mediated signal transduction // protein transport	GO:0005764 // GO:0005768 // GO:0005770 // GO:0005770 // GO:0005794 // GO:0031410	lysosome // endosome // late endosome // late endosome // Golgi apparatus // cytoplasmic vesicle	GO:0000166 // GO:0005525	nucleotide binding // GTP binding	---	---
10479274	1744	Cdh4	-0.102975	-0.584132	-0.807686	-0.228504	0.248563	0.628481	0.610397	1.47275	1.31337	1.33427	-0.00998411	-0.42642	0.0181922	-0.376676	-1.64986	0.864176	0.28785	1.03306	1.21116	0.756952	-1.14202	-2.58864	-0.219066	-0.657735	-0.985516	0.000295091	NM_009867	RefSeq	Mus musculus cadherin 4 (Cdh4), mRNA.	FALSE	GO:0007155 // GO:0007156 // GO:0007157 // GO:0007411 // GO:0045773	cell adhesion // homophilic cell adhesion // heterophilic cell adhesion // axon guidance // positive regulation of axon extension	GO:0005886 // GO:0005887 // GO:0016020 // GO:0016021	plasma membrane // integral to plasma membrane // membrane // integral to membrane	GO:0005509 // GO:0005515	calcium ion binding // protein binding	---	---
10564262	1970	Mkrn3	-0.783424	-2.30349	-0.708487	-0.739061	-0.524822	0.231943	0.899339	1.38388	1.0361	1.48346	-1.77267	-0.73979	-0.608279	-1.36237	0.107058	0.914644	0.559134	1.60269	0.0788219	0.457482	0.618349	0.156616	0.320735	-0.532767	0.224903	0.000295257	NM_011746	RefSeq	Mus musculus makorin, ring finger protein, 3 (Mkrn3), mRNA.	FALSE	---	---	---	---	GO:0003676 // GO:0005515 // GO:0008270 // GO:0046872	nucleic acid binding // protein binding // zinc ion binding // metal ion binding	---	---
10554665	976	EG666160	1.33679	1.02863	1.27414	1.26873	1.16163	-0.8033	-0.213125	-0.452446	-0.365762	-0.229134	-0.760135	0.646224	2.0849	0.929073	1.25891	-0.87927	-0.478836	-0.27632	-0.73391	-0.727375	-0.617969	-0.825088	-1.25909	-1.4118	-0.955466	0.000295257	XR_001840	RefSeq	PREDICTED: Mus musculus predicted gene, EG666160 (EG666160), misc RNA.	FALSE	---	---	---	---	---	---	---	---
10495685	419	Arhgap29	0.486272	0.865535	0.620097	0.387431	0.501506	-1.50577	-1.19636	-1.87599	-2.20243	-1.53521	0.498529	0.559425	0.490732	0.169758	0.165445	-0.155586	0.0588178	-0.27881	-0.253302	-1.0319	1.44382	1.05127	0.819097	0.886368	1.03125	0.000295257	NM_172525	RefSeq	Mus musculus Rho GTPase activating protein 29 (Arhgap29), mRNA.	FALSE	GO:0007165 // GO:0007242	signal transduction // intracellular signaling cascade	GO:0005622	intracellular	GO:0005096 // GO:0008270 // GO:0019992 // GO:0046872	GTPase activator activity // zinc ion binding // diacylglycerol binding // metal ion binding	---	---
10602020	1478	Tbc1d8b	-0.338099	-0.249187	-0.838347	-0.481617	-0.656671	0.000472351	0.514115	0.89567	0.718327	0.581215	-0.846447	0.270256	-0.345259	0.125646	0.104547	1.16633	2.408	1.20246	0.683185	1.40286	-1.41015	-1.28412	-1.1337	-0.724694	-1.76479	0.000295902	NM_001081499	RefSeq	Mus musculus TBC1 domain family, member 8B (Tbc1d8b), mRNA.	FALSE	GO:0032313	regulation of Rab GTPase activity	GO:0005622	intracellular	GO:0005096 // GO:0005097 // GO:0005509	GTPase activator activity // Rab GTPase activator activity // calcium ion binding	---	---
10588454	450	Wdr82	0.37756	0.566627	0.229541	0.97124	0.983052	-1.5909	-1.45194	-1.21595	-0.357965	-0.481139	1.44258	0.505161	-0.292132	0.970808	0.40032	-0.571444	-1.71551	-0.262826	-0.61948	-1.76933	1.64494	1.07299	0.885259	-0.00214041	0.280674	0.000296748	NM_029896	RefSeq	Mus musculus WD repeat domain containing 82 (Wdr82), mRNA.	FALSE	---	---	GO:0005634	nucleus	---	---	---	---
10353775	61	Bend6	0.454047	1.43328	0.733038	0.259475	0.75379	-0.0100487	-0.753934	-0.448069	-0.642227	-1.08239	0.518846	0.785431	1.00226	0.46321	2.12024	-1.41283	-0.653746	-0.916421	-2.38535	-0.642593	0.142411	-0.485945	1.34564	-0.367694	-0.210424	0.000298364	BC057378	GenBank	Mus musculus RIKEN cDNA B230209C24 gene, mRNA (cDNA clone MGC:67495 IMAGE:5707039), complete cds.	FALSE	---	---	---	---	---	---	---	---
10480423	2122	Abi1	-1.28924	-2.46539	-1.1665	-1.31891	-1.04767	0.398395	0.257261	0.871167	0.568843	1.44656	0.0769854	0.378025	-0.726847	0.156898	0.249625	0.67656	0.961277	1.21129	0.821283	1.22925	1.07496	-0.18126	-0.503793	-0.762063	-0.916701	0.000299728	NM_001077190	RefSeq	Mus musculus abl-interactor 1 (Abi1), transcript variant 1, mRNA.	FALSE	GO:0001756 // GO:0009987 // GO:0009987 // GO:0018108	somitogenesis // cellular process // cellular process // peptidyl-tyrosine phosphorylation	GO:0005622 // GO:0005634 // GO:0005737 // GO:0005856 // GO:0019717 // GO:0030027 // GO:0030027 // GO:0030054 // GO:0031252 // GO:0042995 // GO:0045202	intracellular // nucleus // cytoplasm // cytoskeleton // synaptosome // lamellipodium // lamellipodium // cell junction // cell leading edge // cell projection // synapse	GO:0005515 // GO:0030296	protein binding // protein tyrosine kinase activator activity	---	---
10521136	742	Whsc1	0.284899	-0.358927	1.22771	0.707643	0.063281	-1.0081	-0.254671	-0.991325	-1.8208	-1.75535	0.982039	1.0661	0.789413	0.948026	0.515902	-0.500729	-1.37252	-0.332546	-0.0820912	-1.72092	0.15109	1.04709	0.142504	1.63309	0.639185	0.000299728	NM_001081102	RefSeq	Mus musculus Wolf-Hirschhorn syndrome candidate 1 (human) (Whsc1), mRNA.	FALSE	GO:0006350 // GO:0006355 // GO:0016568	transcription // regulation of transcription, DNA-dependent // chromatin modification	GO:0005634	nucleus	GO:0003677 // GO:0005515 // GO:0008168 // GO:0008270 // GO:0016740 // GO:0018024 // GO:0046872	DNA binding // protein binding // methyltransferase activity // zinc ion binding // transferase activity // histone-lysine N-methyltransferase activity // metal ion binding	---	---
10431812	991	Nell2	1.7217	0.742808	1.88164	1.8057	1.58156	-0.187392	-0.235729	-0.916249	-1.00527	-0.880967	-0.136915	0.388534	0.963536	0.575438	0.523829	0.0871659	-1.02738	-0.425861	-0.0882023	-0.833144	-0.342728	-0.592759	-1.28292	-1.25072	-1.06567	0.000309655	NM_016743	RefSeq	Mus musculus NEL-like 2 (chicken) (Nell2), mRNA.	FALSE	GO:0007155	cell adhesion	GO:0005576	extracellular region	GO:0005198 // GO:0005509	structural molecule activity // calcium ion binding	---	---
10437292	295	Btbd12	0.628178	0.943874	-0.0269082	0.307986	0.78187	-1.01863	-1.54581	-0.72381	-1.66427	-0.585026	2.17126	-0.138103	1.87362	1.31254	1.03399	0.0710657	-0.720723	-0.153253	-0.0776722	-0.43443	-1.41726	-0.505155	-0.245581	-0.57929	0.711531	0.000309655	NM_177472	RefSeq	Mus musculus BTB (POZ) domain containing 12 (Btbd12), mRNA.	FALSE	GO:0008150	biological_process	GO:0005575	cellular_component	GO:0003674	molecular_function	---	---
10463462	2124	Sfxn3	-0.243331	-0.944005	-1.11706	-0.98968	-0.764935	0.295163	-0.255961	1.23578	0.980622	1.52727	-0.557311	-0.0708102	-0.858539	-0.454154	-0.334997	1.06354	2.43224	0.175347	1.11276	1.50231	-0.2521	-1.02042	-0.982451	-0.461183	-1.0181	0.000309871	NM_053197	RefSeq	Mus musculus sideroflexin 3 (Sfxn3), mRNA.	FALSE	GO:0006810 // GO:0006811 // GO:0006812 // GO:0006826	transport // ion transport // cation transport // iron ion transport	GO:0005739 // GO:0016020 // GO:0016021	mitochondrion // membrane // integral to membrane	GO:0005506 // GO:0008324	iron ion binding // cation transmembrane transporter activity	---	---
10567134	1579	Plekha7	-0.570844	-0.520329	-0.130404	0.0403102	-0.769903	1.13667	0.906398	1.35169	1.4524	1.26919	0.619327	-0.826967	-0.631929	-0.855934	-1.6435	-0.211403	0.782006	1.39556	1.10785	0.705724	0.0111853	-0.508431	-1.41916	-1.42238	-1.26713	0.000310783	NM_172743	RefSeq	Mus musculus pleckstrin homology domain containing, family A member 7 (Plekha7), mRNA.	FALSE	---	---	---	---	GO:0005515	protein binding	---	---
10460400	1552	Pcx	-0.793362	-0.516063	-0.186439	-0.289046	-0.630125	0.939711	1.24867	2.06244	1.40703	1.78503	-0.105895	-0.160695	-0.265736	-0.346749	-0.0772318	0.0555349	0.171607	0.677998	0.637355	0.936431	-1.25657	-1.55444	-1.2091	-1.43723	-1.09313	0.000310783	NM_008797	RefSeq	Mus musculus pyruvate carboxylase (Pcx), nuclear gene encoding mitochondrial protein, mRNA.	FALSE	GO:0006094 // GO:0008152 // GO:0008610	gluconeogenesis // metabolic process // lipid biosynthetic process	GO:0005737 // GO:0005739 // GO:0005739 // GO:0005743	cytoplasm // mitochondrion // mitochondrion // mitochondrial inner membrane	GO:0000166 // GO:0003824 // GO:0004736 // GO:0005524 // GO:0009374 // GO:0016874 // GO:0030145 // GO:0046872	nucleotide binding // catalytic activity // pyruvate carboxylase activity // ATP binding // biotin binding // ligase activity // manganese ion binding // metal ion binding	GenMAPP // GenMAPP // GenMAPP	Fatty_Acid_Synthesis // Glycolysis_and_Gluconeogenesis // Krebs-TCA_Cycle
10495120	301	Ovgp1	0.774853	0.661775	0.453716	1.15249	0.525895	-0.600147	0.336985	-0.3752	-0.753893	0.0484837	0.755147	0.614887	1.38499	1.0947	1.00857	-0.708812	-0.307805	-1.18634	-2.07515	-1.5592	0.233666	-0.768363	-0.911796	1.62431	-1.42375	0.000311192	NM_007696	RefSeq	Mus musculus oviductal glycoprotein 1 (Ovgp1), mRNA.	FALSE	GO:0005975 // GO:0006032 // GO:0007338	carbohydrate metabolic process // chitin catabolic process // single fertilization	---	---	GO:0003824 // GO:0004553 // GO:0004568 // GO:0043169	catalytic activity // hydrolase activity, hydrolyzing O-glycosyl compounds // chitinase activity // cation binding	---	---
10375439	619	Med7	1.15708	1.36685	0.0381797	0.285499	0.573595	-1.17167	-0.218128	-0.667221	-0.637291	-0.809716	0.846247	0.347915	-0.850375	1.05855	0.270079	-0.906038	-1.70694	-1.03204	-1.40193	-0.94385	0.70416	0.912005	2.33438	0.512904	-0.0622445	0.000312656	NM_025426	RefSeq	Mus musculus mediator complex subunit 7 (Med7), transcript variant 1, mRNA.	FALSE	GO:0006350 // GO:0006355 // GO:0006357 // GO:0045941	transcription // regulation of transcription, DNA-dependent // regulation of transcription from RNA polymerase II promoter // positive regulation of transcription	GO:0005634 // GO:0005667	nucleus // transcription factor complex	GO:0003713 // GO:0030528	transcription coactivator activity // transcription regulator activity	---	---
10424676	79	Ly6e	0.589301	0.899772	0.92908	0.568721	0.575173	-0.79392	-0.805076	-1.45788	-2.09175	-1.31651	0.35616	1.01368	0.510191	0.470856	0.66008	0.35616	-1.70996	-0.52986	-0.0642467	-1.83752	0.908419	1.03496	0.736262	0.714074	0.283826	0.000312656	NM_008529	RefSeq	Mus musculus lymphocyte antigen 6 complex, locus E (Ly6e), mRNA.	FALSE	GO:0001701 // GO:0030325 // GO:0035265 // GO:0042415 // GO:0048242 // GO:0055010	in utero embryonic development // adrenal gland development // organ growth // norepinephrine metabolic process // epinephrine secretion // ventricular cardiac muscle morphogenesis	GO:0005886 // GO:0016020 // GO:0031225	plasma membrane // membrane // anchored to membrane	---	---	---	---
10562050	1889	Upk1a	0.186434	-1.25456	-0.145613	-0.208754	-0.327451	1.51266	0.77697	0.50515	1.39871	1.61725	-1.23096	-0.719028	-0.369579	-0.405788	-2.03829	0.70695	0.178682	0.920683	0.0994543	1.18663	-0.989657	-0.646397	-0.0881772	-1.67217	1.00685	0.000313296	NM_026815	RefSeq	Mus musculus uroplakin 1A (Upk1a), mRNA.	FALSE	GO:0006897 // GO:0007165	endocytosis // signal transduction	GO:0016020 // GO:0016021	membrane // integral to membrane	GO:0005515 // GO:0048029	protein binding // monosaccharide binding	---	---
10573490	1247	Hook2	-1.26896	-1.78014	-0.879422	-1.09453	-0.701693	0.447932	0.64222	1.96217	1.32323	0.473655	-0.316275	-1.61037	-1.03324	-1.19107	-0.246033	0.025497	0.793511	0.510474	-0.12745	0.115282	0.63836	0.133448	0.575058	1.291	1.31734	0.000313296	NM_133255	RefSeq	Mus musculus hook homolog 2 (Drosophila) (Hook2), mRNA.	FALSE	GO:0000226	microtubule cytoskeleton organization	GO:0005737 // GO:0005856 // GO:0005874	cytoplasm // cytoskeleton // microtubule	GO:0008017	microtubule binding	---	---
10397541	887	EG266459	1.35215	0.692084	0.922895	1.39707	1.42425	-0.684309	-0.133163	-1.00054	-0.0280867	-0.273761	-0.541568	0.685331	1.78079	1.26961	1.21693	-0.769357	0.0704854	-0.564465	-0.754646	-1.09991	-0.372869	-0.882677	-1.05421	-1.20374	-1.44829	0.000316204	NR_003647	RefSeq	Mus musculus predicted gene, EG266459 (EG266459), non-coding RNA.	FALSE	---	---	---	---	---	---	---	---
10598141	857		1.47617	0.883186	1.06804	1.58946	1.22162	-0.316073	-0.021326	-0.656536	-0.0734006	-0.145415	-0.649628	1.11323	1.69303	0.796139	0.673242	-0.487216	-0.146874	-0.590631	-0.507823	-0.873182	-0.87079	-0.98085	-1.67441	-1.69674	-0.823235	0.000317572
10351825	803	Tagln2	0.258246	1.80873	0.762009	0.184533	0.166151	-1.83422	-1.68336	-0.896444	-1.0446	-0.472172	1.77762	0.525385	0.0974412	1.49707	1.60895	0.17322	-0.337896	-0.877231	-0.889641	-1.09867	0.594976	-0.0276995	-0.360422	0.154513	-0.0864887	0.000319654	NM_178598	RefSeq	Mus musculus transgelin 2 (Tagln2), mRNA.	FALSE	GO:0007517	muscle development	---	---	---	---	---	---
10420372	120	Cryl1	1.39044	0.265663	0.0418619	0.604833	0.315076	-0.733201	-0.20678	-0.795586	-0.959577	-1.76815	1.20076	0.920927	1.1528	-0.00554255	1.60348	-0.502066	-1.33877	-1.68333	-0.0809352	-1.41992	1.37321	0.811008	-0.705884	0.234363	0.285318	0.000322042	NM_030004	RefSeq	Mus musculus crystallin, lambda 1 (Cryl1), mRNA.	FALSE	GO:0006631 // GO:0008152 // GO:0055114	fatty acid metabolic process // metabolic process // oxidation reduction	---	---	GO:0003824 // GO:0005488 // GO:0016491 // GO:0050104	catalytic activity // binding // oxidoreductase activity // L-gulonate 3-dehydrogenase activity	---	---
10491721	1317	Spry1	-0.307695	-1.04217	0.0272061	-0.461207	-0.618907	1.30759	1.43632	1.86619	0.286105	0.413563	-1.51752	-1.19972	-0.845914	-0.88231	-1.54959	0.263689	-0.493156	0.624264	0.502165	1.76757	-0.665136	-0.0117697	-0.780765	1.23755	0.643644	0.000322997	NM_011896	RefSeq	Mus musculus sprouty homolog 1 (Drosophila) (Spry1), mRNA.	FALSE	GO:0001656 // GO:0001657 // GO:0001657 // GO:0001759 // GO:0007275 // GO:0009966 // GO:0043407	metanephros development // ureteric bud development // ureteric bud development // induction of an organ // multicellular organismal development // regulation of signal transduction // negative regulation of MAP kinase activity	GO:0005737 // GO:0016020	cytoplasm // membrane	GO:0005515	protein binding	---	---
10462217	8	Dmrt1	0.945289	0.758121	0.964609	1.01466	1.04253	-0.692362	-0.58581	-1.71884	-2.12902	-2.02765	0.656483	0.503035	0.468123	0.2412	0.155725	-0.192099	-0.932126	-0.45343	-0.028545	-1.44327	1.18772	0.88785	0.281877	0.503166	0.59277	0.000322997	NM_015826	RefSeq	Mus musculus doublesex and mab-3 related transcription factor 1 (Dmrt1), mRNA.	FALSE	GO:0006350 // GO:0006355 // GO:0007275 // GO:0007530 // GO:0007548 // GO:0030154	transcription // regulation of transcription, DNA-dependent // multicellular organismal development // sex determination // sex differentiation // cell differentiation	GO:0005634	nucleus	GO:0003677 // GO:0003700 // GO:0008270 // GO:0046872	DNA binding // transcription factor activity // zinc ion binding // metal ion binding	---	---
10461629	409	Ms4a4d	-0.031589	0.860257	1.08476	0.566103	0.885308	-0.416098	-0.126963	-1.47953	-1.74763	-1.26835	0.775532	1.07947	0.680895	0.0133896	0.188274	-0.134827	-1.87975	-0.752705	-0.689417	-1.55958	-0.121177	0.714872	1.10909	1.54838	0.701297	0.000324112	NM_025658	RefSeq	Mus musculus membrane-spanning 4-domains, subfamily A, member 4D (Ms4a4d), mRNA.	FALSE	GO:0007165	signal transduction	GO:0016020 // GO:0016021	membrane // integral to membrane	GO:0004872	receptor activity	---	---
10401519	1480	Npc2	-0.30647	-0.127803	-0.142524	-0.346127	-0.227697	0.198159	0.248735	1.38934	0.503013	0.314833	-0.597835	-0.286354	-0.28973	-0.095679	0.312289	1.33561	1.94168	1.07461	1.08534	1.09247	-0.413644	-1.52669	-1.88905	-1.26008	-1.9864	0.000325152	NM_023409	RefSeq	Mus musculus Niemann Pick type C2 (Npc2), mRNA.	FALSE	GO:0032367 // GO:0042632	intracellular cholesterol transport // cholesterol homeostasis	GO:0005576 // GO:0005764	extracellular region // lysosome	GO:0015485	cholesterol binding	---	---
10352756	222	Lpgat1	0.131258	0.916459	0.691178	0.727359	-0.281028	-1.72933	-0.607028	-1.53873	-1.42857	-1.22949	0.56469	0.706602	0.940266	0.614328	1.44758	-0.352376	-0.04579	-0.345382	-0.322188	-2.29112	1.08604	0.71064	0.0818051	1.00806	0.544769	0.000331444	NM_001134829	RefSeq	Mus musculus lysophosphatidylglycerol acyltransferase 1 (Lpgat1), transcript variant 1, mRNA.	FALSE	GO:0008152 // GO:0008654	metabolic process // phospholipid biosynthetic process	GO:0005783 // GO:0016020 // GO:0016021	endoplasmic reticulum // membrane // integral to membrane	GO:0008415 // GO:0016740	acyltransferase activity // transferase activity	---	---
10388532	423	Nxn	0.284668	1.08429	0.498082	0.107768	0.245932	-1.19149	-1.22559	-1.48217	-1.67778	-1.10318	1.28026	0.456692	-0.0733287	0.503768	0.743961	-0.183706	-0.477232	-0.327353	-0.271222	-2.17979	0.713347	1.15596	0.750439	1.50583	0.861851	0.000335333	NM_008750	RefSeq	Mus musculus nucleoredoxin (Nxn), mRNA.	FALSE	GO:0007275 // GO:0016055 // GO:0030154 // GO:0045454 // GO:0055114	multicellular organismal development // Wnt receptor signaling pathway // cell differentiation // cell redox homeostasis // oxidation reduction	GO:0005634 // GO:0005737	nucleus // cytoplasm	GO:0004791 // GO:0016209 // GO:0016491 // GO:0047134	thioredoxin-disulfide reductase activity // antioxidant activity // oxidoreductase activity // protein-disulfide reductase activity	---	---
10479560	1256	Rtel1	-0.00803763	-1.21091	-0.482108	-0.198716	-0.312887	0.72177	0.498322	0.599739	1.70199	1.55799	-0.450923	-0.0315672	-2.05782	-1.49983	-2.15357	0.606713	1.27843	0.659471	0.604231	1.15052	-0.120931	-0.181132	-0.0362312	-0.381185	-0.253333	0.000345451	NM_001001882	RefSeq	Mus musculus regulator of telomere elongation helicase 1 (Rtel1), mRNA.	FALSE	GO:0000723	telomere maintenance	GO:0005634	nucleus	GO:0004386	helicase activity	---	---
10417798	509	Kcnk5	0.726461	1.23651	0.664443	0.596043	0.77031	-1.01828	-0.242921	-0.641368	-1.61509	-1.28699	1.16092	-0.604874	0.673621	0.346488	1.25596	-0.727183	-2.2286	-0.411306	-0.458106	-1.4899	1.10636	0.534426	0.0342561	0.789251	0.829562	0.000349813	NM_021542	RefSeq	Mus musculus potassium channel, subfamily K, member 5 (Kcnk5), mRNA.	FALSE	GO:0006810 // GO:0006811	transport // ion transport	GO:0016020 // GO:0016021	membrane // integral to membrane	GO:0005216	ion channel activity	---	---
10459755	279	2810433K01Rik	1.0439	1.00486	0.518138	0.589811	0.592521	-1.24217	-0.656984	-0.556955	-0.242588	-0.139315	0.942896	0.197601	1.44269	-0.550855	0.757143	-1.00163	-0.852742	-1.29338	-2.54823	-1.17771	-0.0527578	0.254377	1.00443	0.542277	1.42467	0.000349813	BC019940	GenBank	Mus musculus RIKEN cDNA 2810433K01 gene, mRNA (cDNA clone MGC:28070 IMAGE:3709649), complete cds.	FALSE	GO:0007049 // GO:0007067 // GO:0051301	cell cycle // mitosis // cell division	---	---	---	---	---	---
10417734	2028	Nr1d2	0.357396	0.179862	-0.00700967	-0.476815	-1.02069	0.686769	0.983163	1.18713	1.93011	1.38304	-0.445892	-1.37844	-0.561579	-1.41391	-1.26659	-0.0582174	0.480972	0.724856	0.147203	1.71347	0.400351	-0.369844	-0.530737	-1.69237	-0.95223	0.000349988	NM_011584	RefSeq	Mus musculus nuclear receptor subfamily 1, group D, member 2 (Nr1d2), mRNA.	FALSE	GO:0006350 // GO:0006355	transcription // regulation of transcription, DNA-dependent	GO:0005634	nucleus	GO:0003677 // GO:0003700 // GO:0003707 // GO:0004872 // GO:0004879 // GO:0004887 // GO:0008270 // GO:0043565 // GO:0046872	DNA binding // transcription factor activity // steroid hormone receptor activity // receptor activity // ligand-dependent nuclear receptor activity // thyroid hormone receptor activity // zinc ion binding // sequence-specific DNA binding // metal ion binding	GenMAPP // GenMAPP	Nuclear_Receptors // Circadian_Exercise
10362918	1589	---	-0.679602	-0.815824	-0.479958	-0.244154	-0.227073	1.87702	1.69191	1.23187	0.478981	1.02429	-1.44535	-1.1261	-0.0400478	0.471247	-1.37775	0.450278	1.53482	0.436461	0.805918	0.514557	-1.29296	-0.792685	-0.0645961	-1.10316	-0.828089	0.000349988	GENSCAN00000034535	ENSEMBL	cdna:Genscan chromosome:NCBIM37:10:43873975:43874724:1	FALSE	---	---	---	---	---	---	---	---
10506150	1591	Foxd3	-0.156391	-0.515713	-0.572374	-0.581786	-0.40702	1.72889	1.82821	2.07161	1.08971	1.49998	0.0955761	-0.825069	-1.04929	-1.03115	-0.166133	-0.265702	-0.170444	0.230506	0.7253	0.746065	-1.23531	-0.188957	-0.618556	-1.48007	-0.751883	0.000355188	NM_010425	RefSeq	Mus musculus forkhead box D3 (Foxd3), mRNA.	FALSE	GO:0000122 // GO:0001829 // GO:0001892 // GO:0006350 // GO:0006355 // GO:0007275	negative regulation of transcription from RNA polymerase II promoter // trophectodermal cell differentiation // embryonic placenta development // transcription // regulation of transcription, DNA-dependent // multicellular organismal development	GO:0005634 // GO:0005667	nucleus // transcription factor complex	GO:0003677 // GO:0003700 // GO:0043565	DNA binding // transcription factor activity // sequence-specific DNA binding	---	---
10411156	105	Scamp1	0.571411	0.0403165	1.44479	1.04768	1.06654	-1.21554	-0.321595	-0.326825	-1.40456	-0.992288	-0.570171	0.968698	1.48637	0.887722	0.828679	-0.809967	-1.62896	-0.423347	-0.464263	-1.89444	0.451287	1.43327	0.296511	-0.292295	-0.179016	0.000356143	NM_029153	RefSeq	Mus musculus secretory carrier membrane protein 1 (Scamp1), mRNA.	FALSE	GO:0006810 // GO:0006887 // GO:0015031	transport // exocytosis // protein transport	GO:0008021 // GO:0016020 // GO:0016021 // GO:0030672 // GO:0042589	synaptic vesicle // membrane // integral to membrane // synaptic vesicle membrane // zymogen granule membrane	---	---	---	---
10447383	1203	Epcam	-0.587054	-2.54234	-0.3275	-0.323057	-0.503892	0.827666	1.25271	0.783701	0.456969	0.474704	-0.869849	-0.533248	-0.930244	-1.14635	-2.35837	0.265999	0.547913	0.75311	0.747366	1.16557	0.584463	0.797257	0.31283	0.730418	0.421233	0.000356827	NM_008532	RefSeq	Mus musculus tumor-associated calcium signal transducer 1 (Tacstd1), mRNA.	FALSE	---	---	GO:0016323 // GO:0016324	basolateral plasma membrane // apical plasma membrane	---	---	---	---
10377938	435	Eno3	0.642454	0.378464	0.575912	1.05375	1.12729	-1.25742	-1.37106	-1.69575	-1.80301	-1.01633	1.25307	0.812415	0.390317	0.773726	-0.857912	-0.293459	-0.353319	-0.529064	-0.493469	-1.44843	0.641779	0.954688	0.694577	1.13187	0.688895	0.000356827	NM_007933	RefSeq	Mus musculus enolase 3, beta muscle (Eno3), mRNA.	FALSE	GO:0006096	glycolysis	GO:0000015 // GO:0005737	phosphopyruvate hydratase complex // cytoplasm	GO:0000287 // GO:0004634 // GO:0016829 // GO:0046872	magnesium ion binding // phosphopyruvate hydratase activity // lyase activity // metal ion binding	GenMAPP	Glycolysis_and_Gluconeogenesis
10368675	1394	Marcks	-0.610397	0.0987175	-0.824698	-1.32502	-1.6346	0.110658	0.0669212	0.0815535	-0.0341227	0.599271	-1.52194	-0.518646	-1.82442	-0.861935	-1.07203	1.17287	1.76497	1.00513	0.728805	0.702221	0.074785	0.872822	0.819792	1.27504	0.854263	0.000357608	NM_008538	RefSeq	Mus musculus myristoylated alanine rich protein kinase C substrate (Marcks), mRNA.	FALSE	---	---	GO:0005737 // GO:0005813 // GO:0005856 // GO:0005938 // GO:0016020 // GO:0042585	cytoplasm // centrosome // cytoskeleton // cell cortex // membrane // germinal vesicle	GO:0003779 // GO:0005080 // GO:0005516	actin binding // protein kinase C binding // calmodulin binding	---	---
10594404	746	Smad3	0.751441	0.148259	1.86801	1.02613	0.319942	-0.802679	-1.10128	-0.315221	-1.92495	-1.43916	0.620309	1.7595	0.584569	0.870194	0.294777	0.0901916	-1.07983	-0.878249	-0.148596	-1.31426	0.321949	0.114222	-0.996956	1.2503	-0.0186096	0.000357608	NM_016769	RefSeq	Mus musculus MAD homolog 3 (Drosophila) (Smad3), mRNA.	FALSE	GO:0000122 // GO:0001707 // GO:0002076 // GO:0006350 // GO:0006355 // GO:0007179 // GO:0016202 // GO:0017015 // GO:0042110 // GO:0045668 // GO:0045893 // GO:0045941 // GO:0045944 // GO:0045944 // GO:0048340 // GO:0050678 // GO:0050776 // GO:0051098	negative regulation of transcription from RNA polymerase II promoter // mesoderm formation // osteoblast development // transcription // regulation of transcription, DNA-dependent // transforming growth factor beta receptor signaling pathway // regulation of striated muscle development // regulation of transforming growth factor beta receptor signaling pathway // T cell activation // negative reg…	GO:0005622 // GO:0005634 // GO:0005667 // GO:0005737 // GO:0005886	intracellular // nucleus // transcription factor complex // cytoplasm // plasma membrane	GO:0003690 // GO:0003700 // GO:0005515 // GO:0005515 // GO:0005518 // GO:0008134 // GO:0016563	double-stranded DNA binding // transcription factor activity // protein binding // protein binding // collagen binding // transcription factor binding // transcription activator activity	GenMAPP // GenMAPP // GenMAPP	Cell_Cycle_KEGG // Ovarian_Infertility_Genes // TGF_Beta_Signaling_Pathway
10406581	497	Dhfr	1.46335	0.587152	0.954859	1.15984	2.17037	-1.29988	-0.329045	-1.03962	-0.998946	-0.159418	1.5309	1.00631	0.10374	-0.197149	-0.148163	-1.42235	-0.619496	-0.332742	-0.882721	-1.13219	-0.826922	1.14475	-0.18139	0.20327	-0.754501	0.000357608	NM_010049	RefSeq	Mus musculus dihydrofolate reductase (Dhfr), mRNA.	FALSE	GO:0006545 // GO:0006730 // GO:0009165 // GO:0055114	glycine biosynthetic process // one-carbon compound metabolic process // nucleotide biosynthetic process // oxidation reduction	---	---	GO:0004146 // GO:0016491	dihydrofolate reductase activity // oxidoreductase activity	GenMAPP	Nucleotide_Metabolism
[truncated: 1,663 more rows]
