# Supplementary material for: Residual Expression of Reprogramming Factors Affects the Transcriptional Program and Epigenetic Signatures of Induced Pluripotent Stem Cells
Source: PLoS One. 2012 Dec 14;7(12):e51711. doi: 10.1371/journal.pone.0051711 (PMC3522693; doi:10.1371/journal.pone.0051711)
Supplement: Table S2 — Gene ontology analysis of differentially expressed genes. (XLSX) [file pone.0051711.s005.xlsx]

## Sheet: Sheet1
GO Term	Count	Fold Enrichment	PValue	Genes
GO:0006323~DNA packaging	23	2.32305	0.000255311	HIST1H2BA, HIST4H4, HIST1H1E, HIST1H2AA, HIST1H1B, HIST1H1A, SUV39H1, H1FX, NCAPD2, HIST2H2BB, HIST1H1T, STRA8, SMARCC1, H2AFY2, ATF6B, CENPV, H2AFY, HIST3H2A, NCAPH2, ACIN1, HIST3H2BB, CDCA5, MYST3
GO:0022604~regulation of cell morphogenesis	21	2.20851	0.000999704	FGD1, EFNA1, PDPN, SMAD2, CDH4, NTN1, RHOU, METRN, EZR, FYN, ULK1, TIAM1, ITGA7, CYFIP1, CDC42EP4, NEFL, CDC42EP3, NEFM, CACNA1A, CDC42EP5, FN1
GO:0006790~sulfur metabolic process	19	2.06194	0.00408446	OCLN, NDST1, NDST2, SPOCK2, ALDH5A1, G6PDX, GGT1, SOD2, MTHFD1, ADI1, CTH, EGFLAM, SULF2, GPX4, PHGDH, GSTP2, HS3ST3B1, CACNA1A, GSTP1, CBS
GO:0040029~regulation of gene expression, epigenetic	18	2.62317	0.000326948	DNMT3A, EIF2C1, SMCHD1, SUV39H1, MAEL, HAT1, SIRT6, MBD4, SIRT7, MBD1, BRCA1, MOV10, CLP1, TRDMT1, H2AFY2, H2AFY, PIWIL4, TNRC6A
GO:0065004~protein-DNA complex assembly	16	2.14762	0.00626403	HIST1H2BA, HIST4H4, HIST1H1E, HIST1H2AA, HIST1H1B, HIST1H1A, H1FX, MIS12, HIST1H1T, HIST2H2BB, H2AFY2, CENPV, H2AFY, HIST3H2A, HIST3H2BB, MYST3
GO:0031497~chromatin assembly	15	2.04024	0.0132069	HIST1H2BA, HIST4H4, HIST1H1E, HIST1H2AA, HIST1H1B, HIST1H1A, H1FX, HIST1H1T, HIST2H2BB, H2AFY2, CENPV, H2AFY, HIST3H2A, HIST3H2BB, MYST3
GO:0030031~cell projection assembly	14	2.04024	0.0172654	KLF5, MTSS1, MYO1A, CCDC88A, ROCK1, BAIAP2L1, PDGFA, PCNT, BAIAP2, P2RX7, PRDX6, NCK1, CYFIP1, NEURL1A
GO:0016458~gene silencing	13	2.32659	0.0081875	DNMT3A, EIF2C1, SUV39H1, MAEL, HAT1, SIRT6, SIRT7, MOV10, CLP1, ATF6B, PIWIL4, SCMH1, TNRC6A
GO:0007179~transforming growth factor beta receptor signaling pathway	12	2.5503	0.00575253	SMAD7, PDGFA, LTBP4, HIPK2, SMAD5, PML, SMAD3, SMAD2, HPGD, ARAP1, ACVR1, BMP8A
GO:0009582~detection of abiotic stimulus	12	2.35412	0.0107177	GUCA1B, GNAT1, TULP1, GUCA1A, FECH, PDE6D, CHRNA9, FYN, TRPA1, CABP4, NGFR, MYC
GO:0006606~protein import into nucleus	12	2.18597	0.0184449	TXNIP, CRY2, SPNB2, IPO5, TSC2, PML, FGF10, KPNA6, NUTF2, POLA2, IPO8, ARAP1
GO:0051170~nuclear import	12	2.11059	0.0235823	TXNIP, CRY2, SPNB2, IPO5, TSC2, PML, FGF10, KPNA6, NUTF2, POLA2, IPO8, ARAP1
GO:0009581~detection of external stimulus	12	2.04024	0.0296905	GUCA1B, GNAT1, TULP1, GUCA1A, FECH, PDE6D, CHRNA9, FYN, TRPA1, CABP4, NGFR, MYC
GO:0034504~protein localization in nucleus	12	2.00679	0.0331351	TXNIP, CRY2, SPNB2, IPO5, TSC2, PML, FGF10, KPNA6, NUTF2, POLA2, IPO8, ARAP1
GO:0008360~regulation of cell shape	11	2.38752	0.014061	FGD1, EZR, PDPN, FYN, ITGA7, CYFIP1, CDC42EP4, RHOU, CDC42EP3, FN1, CDC42EP5
GO:0030218~erythrocyte differentiation	11	2.33778	0.0162475	FECH, RPS19, ID2, G6PDX, SMAD5, SLC25A38, ACIN1, DNASE2A, TIMP1, MB, ADD1
GO:0034101~erythrocyte homeostasis	11	2.20026	0.0243151	FECH, RPS19, ID2, G6PDX, SMAD5, SLC25A38, ACIN1, DNASE2A, TIMP1, MB, ADD1
GO:0044242~cellular lipid catabolic process	11	2.00381	0.0435713	GBA2, LPL, ACOT7, ACADM, ACER1, HEXB, SMPD1, PLA2G1B, PEX5, PNPLA3, ACOX3
GO:0010720~positive regulation of cell development	10	2.17047	0.0364565	SMO, VEGFC, METRN, TIAM1, XRCC6, NPTN, SMAD2, CDH4, NEFL, NTN1
GO:0051235~maintenance of location	9	2.78215	0.0124359	APOE, GRIK5, PML, TMSB10, TMSB4X, TACC3, TNRC6A, GRINL1A, OS9
GO:0007033~vacuole organization	9	2.70032	0.0149021	HOOK2, TPP1, LYST, HEXB, GAA, CTSD, CLN5, GBA, CLN6
GO:0048002~antigen processing and presentation of peptide antigen	9	2.62317	0.0177045	H2-Q2, FCGR2B, H2-EB1, IFI30, MR1, H2-Q6, CALR, H2-Q7, H2-DMB2, FCGR3, B2M
GO:0006518~peptide metabolic process	9	2.41607	0.0283476	2900062L11RIK, TPP1, ALDH5A1, GPX4, 6530401D17RIK, G6PDX, GGT1, SPCS1, GSTP2, GSTP1, SOD2
GO:0050770~regulation of axonogenesis	9	2.35412	0.0327067	METRN, EFNA1, ULK1, TIAM1, CDH4, NEFL, NTN1, CACNA1A, NEFM
GO:0050769~positive regulation of neurogenesis	9	2.23929	0.042744	SMO, VEGFC, METRN, TIAM1, XRCC6, NPTN, CDH4, NEFL, NTN1
GO:0007040~lysosome organization	8	3.70953	0.00387648	HOOK2, TPP1, LYST, HEXB, GAA, CLN5, GBA, CLN6
GO:0006476~protein amino acid deacetylation	7	3.75834	0.00773104	HDAC1, NDST1, PRDM5, HOPX, SIRT6, SIRT7, HDAC6
GO:0051651~maintenance of location in cell	7	2.85634	0.0304176	APOE, GRIK5, PML, TACC3, TNRC6A, GRINL1A, OS9
GO:0021575~hindbrain morphogenesis	7	2.74648	0.0363715	DLC1, SMO, DAB1, RFX4, ULK1, LDB1, CACNA1A
GO:0007435~salivary gland morphogenesis	7	2.64476	0.0430229	EGFR, LAMA1, DAG1, TGM2, CTNND1, FGF10, BMP7
GO:0007549~dosage compensation	4	5.82926	0.0242698	SMCHD1, H2AFY2, H2AFY, BRCA1
GO:0002456~T cell mediated immunity	4	5.82926	0.0242698	ICAM1, LYST, RAB27A, DLG1
GO:0009070~serine family amino acid biosynthetic process	4	5.1006	0.0360456	CTH, DHFR, PHGDH, CBS
p < 0.05 (EASE score), fold enrichment > 2
