# Supplementary material for: Residual Expression of Reprogramming Factors Affects the Transcriptional Program and Epigenetic Signatures of Induced Pluripotent Stem Cells
Source: PLoS One. 2012 Dec 14;7(12):e51711. doi: 10.1371/journal.pone.0051711 (PMC3522693; doi:10.1371/journal.pone.0051711)
Supplement: Table S3 — Log2 values of genes associated with enriched GO terms. (XLSX) [file pone.0051711.s006.xlsx]

## Sheet: Sheet1
Epigenetic Regulation of Gene Expression
Probe Set ID	Cluster ID	Gene.Symbol	B-Cre	C-Cre	D-Cre	E-Cre	F-Cre	B	C	D	E	F	5-Cre	6-Cre	10-Cre	11-Cre	15-Cre	5	6	10	11	15	ESC 1	ESC 2	ESC 3	ESC 4	ESC 5	p.phe.cre	p.cre	p.phe	p.phe.cre.fdr	p.cre.fdr	p.phe.fdr	mRNA.Accession	mRNA..Source	mRna...Description	mRNA...xhyb	GO.Biological.Process.ID	GO.Biological.Process.Term	GO.Cellular.Component.ID	GO.Cellular.Component.Term	GO.Molecular.Function.ID	GO.Molecular.Function.Term	Pathway.Source	Pathway.Name
10419825	610	Acin1	0.488987	0.739549	0.266735	0.737103	-0.449242	0.0323622	-0.502463	-0.859656	-0.767633	-1.2669	1.21269	-0.0108252	0.863602	0.729724	0.540786	-0.613808	-2.55367	-0.70409	-0.598344	-1.34032	0.0114895	2.06138	1.43876	0.549248	-0.00547524	0.146822	6.52017e-05	0.746906	0.507681	0.00156199	0.972058	NM_023190	RefSeq	Mus musculus apoptotic chromatin condensation inducer 1 (Acin1), transcript variant 2, mRNA.	FALSE	GO:0006915 // GO:0008632	apoptosis // apoptotic program	GO:0005634 // GO:0005730	nucleus // nucleolus	GO:0000166 // GO:0003676	nucleotide binding // nucleic acid binding	GenMAPP	mRNA_processing_binding_Reactome
10444439	1732	Atf6b	0.0522827	-0.842115	-0.257045	-0.198532	-0.039613	0.453135	1.00902	0.986547	1.41475	1.54122	-0.382849	0.621495	-1.29237	-0.688429	-1.81252	1.07417	0.58913	1.14683	0.685495	0.846925	-1.33707	-0.495147	-0.0777281	-1.73354	-1.26405	0.631781	1.32915e-05	0.185691	0.860463	0.00049819	0.793807	NM_017406	RefSeq	Mus musculus cAMP responsive element binding protein-like 1 (Crebl1), mRNA.	FALSE	GO:0006350 // GO:0006355 // GO:0006986 // GO:0008150	transcription // regulation of transcription, DNA-dependent // response to unfolded protein // biological_process	GO:0005622 // GO:0005634 // GO:0005783 // GO:0016020 // GO:0016021	intracellular // nucleus // endoplasmic reticulum // membrane // integral to membrane	GO:0003674 // GO:0003677 // GO:0003700 // GO:0043565 // GO:0046983	molecular_function // DNA binding // transcription factor activity // sequence-specific DNA binding // protein dimerization activity	---	---
10391461	2163	Brca1	-1.28493	-0.554218	-0.77016	-1.4325	-0.980622	0.935753	1.06253	2.04362	1.26756	0.927337	-0.623242	-1.37167	-0.848841	-1.04682	0.436264	-0.636922	1.25813	0.758945	-0.535353	1.27828	0.761907	-0.0948035	-0.143194	-0.611415	0.204366	0.0702105	5.50756e-05	0.431309	0.392764	0.00138972	0.901881	NM_009764	RefSeq	Mus musculus breast cancer 1 (Brca1), mRNA.	FALSE	GO:0006260 // GO:0006281 // GO:0006633 // GO:0006974 // GO:0007049 // GO:0007098 // GO:0008610 // GO:0008630 // GO:0009048 // GO:0043009 // GO:0045786 // GO:0051298	DNA replication // DNA repair // fatty acid biosynthetic process // response to DNA damage stimulus // cell cycle // centrosome cycle // lipid biosynthetic process // DNA damage response, signal transduction resulting in induction of apoptosis // dosage compensation, by inactivation of X chromosome // chordate embryonic development // negative regulation of cell cycle // centrosome duplication	GO:0000793 // GO:0005622 // GO:0005634 // GO:0005737 // GO:0005813	condensed chromosome // intracellular // nucleus // cytoplasm // centrosome	GO:0003677 // GO:0003684 // GO:0003723 // GO:0005515 // GO:0008270 // GO:0046872	DNA binding // damaged DNA binding // RNA binding // protein binding // zinc ion binding // metal ion binding	---	---
10460738	460	Cdca5	0.455895	-0.851686	1.07693	1.12897	1.21613	-0.497059	-0.596894	-1.68766	-0.53975	-0.784995	1.18853	0.606627	-0.244966	-0.362675	-0.572381	-0.949801	-1.21504	-0.696863	-0.405424	-1.60798	0.590501	1.72327	1.59147	0.715035	0.719831	0.588693	0.000453943	0.290508	0.837434	0.00661365	0.851497	NM_026410	RefSeq	Mus musculus cell division cycle associated 5 (Cdca5), mRNA.	FALSE	GO:0007049 // GO:0007067 // GO:0051301	cell cycle // mitosis // cell division	GO:0005634 // GO:0005737	nucleus // cytoplasm	GO:0005515	protein binding	---	---
10386909	1189	Cenpv	0.152295	1.42664	0.140331	0.106831	0.423798	-0.208217	0.131307	0.448919	-0.0362273	-0.331084	1.46551	-0.084768	1.13229	0.868135	2.17794	-2.11274	-1.33253	-0.743499	-1.08776	-1.09948	0.882302	-0.323653	-1.42962	-0.00778588	-0.558939	0.00187367	0.000734959	0.386066	0.172127	0.00937226	0.885631	BC147835	GenBank	Mus musculus proline-rich polypeptide 6, mRNA (cDNA clone MGC:182938 IMAGE:9087552), complete cds.	FALSE	GO:0008152	metabolic process	GO:0005634	nucleus	GO:0016846	carbon-sulfur lyase activity	---	---
10484457	801	Clp1	0.00016548	0.248626	0.401614	0.681235	0.723061	-1.57038	-0.626741	-0.911536	-0.672742	-0.999655	1.02717	-0.279899	1.44546	0.655717	2.76962	-0.962534	-1.08138	-0.550976	-1.31234	-1.07131	0.243556	0.712516	0.17407	0.462796	0.493883	0.197518	1.20306e-05	0.255898	0.564454	0.000464124	0.834398	NM_133840	RefSeq	Mus musculus CLP1, cleavage and polyadenylation factor I subunit, homolog (S. cerevisiae) (Clp1), mRNA.	FALSE	GO:0006397	mRNA processing	GO:0005634	nucleus	GO:0000166 // GO:0005524	nucleotide binding // ATP binding	GenMAPP	Smooth_muscle_contraction
10394209	402	Dnmt3a	0.426196	1.27404	0.482745	0.724619	0.714648	-0.116592	-0.170849	-1.93967	-1.77359	-1.90842	1.06348	1.05314	0.644392	0.0950352	-0.33583	-0.404545	-1.15991	-0.537216	0.0109315	-1.59895	0.477464	0.699296	0.358073	1.46609	0.455408	0.284508	7.02727e-05	0.715888	0.643732	0.00164963	0.966541	NM_007872	RefSeq	Mus musculus DNA methyltransferase 3A (Dnmt3a), transcript variant 1, mRNA.	FALSE	GO:0000122 // GO:0006306 // GO:0006306 // GO:0006346 // GO:0006346 // GO:0006349 // GO:0006350 // GO:0006355 // GO:0007283	negative regulation of transcription from RNA polymerase II promoter // DNA methylation // DNA methylation // methylation-dependent chromatin silencing // methylation-dependent chromatin silencing // genetic imprinting // transcription // regulation of transcription, DNA-dependent // spermatogenesis	GO:0000792 // GO:0005634 // GO:0005720 // GO:0005737	heterochromatin // nucleus // nuclear heterochromatin // cytoplasm	GO:0003677 // GO:0003682 // GO:0003886 // GO:0003886 // GO:0005515 // GO:0008168 // GO:0008270 // GO:0016740 // GO:0046872	DNA binding // chromatin binding // DNA (cytosine-5-)-methyltransferase activity // DNA (cytosine-5-)-methyltransferase activity // protein binding // methyltransferase activity // zinc ion binding // transferase activity // metal ion binding	---	---
10516371	90	Eif2c1	1.14145	0.200089	1.80684	0.371632	0.324823	-0.0395546	-0.390595	-0.615076	-1.63148	-1.21589	-0.966138	1.42186	0.746774	0.156119	0.317421	-0.0470926	-2.13477	-0.0666384	-1.31168	-1.26783	0.396143	1.10325	1.02634	-0.0450446	0.719058	0.729706	0.000643223	0.376201	0.903098	0.00853639	0.88229	NM_153403	RefSeq	Mus musculus eukaryotic translation initiation factor 2C, 1 (Eif2c1), mRNA.	FALSE	GO:0006412 // GO:0008150 // GO:0031047	translation // biological_process // gene silencing by RNA	GO:0005575	cellular_component	GO:0003674 // GO:0003743	molecular_function // translation initiation factor activity	---	---
10546088	54	H1fx	0.246987	0.319031	-0.200419	-0.313273	-0.0170609	-0.120047	-0.7859	-1.39698	-1.89759	-0.603204	1.23673	-0.317423	1.39929	1.5934	2.39886	-0.500572	-1.87665	-0.176651	-0.359427	-0.492007	0.0638132	0.411687	0.0335547	0.713022	0.640818	0.142691	0.000370576	0.0321806	0.502353	0.00569059	0.543084	NM_198622	RefSeq	Mus musculus H1 histone family, member X (H1fx), mRNA.	FALSE	---	---	GO:0005634 // GO:0005694	nucleus // chromosome	GO:0003677	DNA binding	---	---
10409557	1072	H2afy	0.230995	1.59045	0.402652	0.137035	-0.43771	-1.45409	-0.67932	-0.377606	-0.83845	-0.735207	0.938429	-0.617376	1.18061	1.74429	2.39868	-0.684665	-0.534245	-0.445894	-0.772826	-1.55318	0.719527	0.0678112	-0.334551	-0.691154	0.74579	0.287556	0.000199583	0.266078	0.646001	0.00357639	0.836434	NM_012015	RefSeq	Mus musculus H2A histone family, member Y (H2afy), mRNA.	FALSE	GO:0006334 // GO:0007549 // GO:0016568	nucleosome assembly // dosage compensation // chromatin modification	GO:0000786 // GO:0000793 // GO:0001740 // GO:0005634 // GO:0005694 // GO:0005813	nucleosome // condensed chromosome // Barr body // nucleus // chromosome // centrosome	GO:0003677 // GO:0003682	DNA binding // chromatin binding	---	---
10369481	155	H2afy2	0.205274	1.47068	0.489693	-0.0115832	0.617823	-1.7843	-1.33404	-0.248358	-1.35013	-1.03024	0.0422036	0.444719	0.629007	0.503854	1.59315	-0.607118	-0.55958	-0.250451	-1.50432	-1.38203	1.69737	1.19198	0.133067	0.740193	0.303136	0.697401	5.48818e-06	0.455667	0.890958	0.000264921	0.907503	NM_207000	RefSeq	Mus musculus H2A histone family, member Y2 (H2afy2), mRNA.	FALSE	GO:0006334 // GO:0007549 // GO:0016568	nucleosome assembly // dosage compensation // chromatin modification	GO:0000786 // GO:0001740 // GO:0005634 // GO:0005694	nucleosome // Barr body // nucleus // chromosome	GO:0003677	DNA binding	---	---
10472782	727	Hat1	0.264925	-0.653995	0.377799	0.640446	0.654311	-0.489325	-0.432946	-0.964198	-0.0929485	-0.636921	0.255872	1.14786	2.05865	1.77526	0.414125	-1.66161	-2.06498	-0.281912	-0.85098	-0.714729	-0.169267	0.657405	-1.11237	0.907905	0.971619	0.0183881	0.000219605	0.668687	0.264142	0.00385886	0.95675	NM_026115	RefSeq	Mus musculus histone aminotransferase 1 (Hat1), mRNA.	FALSE	GO:0006348 // GO:0016573	chromatin silencing at telomere // histone acetylation	GO:0005634 // GO:0005737	nucleus // cytoplasm	GO:0004402 // GO:0005515 // GO:0008415 // GO:0008483 // GO:0016740	histone acetyltransferase activity // protein binding // acyltransferase activity // transaminase activity // transferase activity	---	---
10404069	288	Hist1h1a	-0.164551	0.651545	0.848021	0.409544	0.64941	-1.13099	-0.540731	-0.0563364	-0.668201	-0.944052	1.47134	-0.498604	0.921602	0.780017	2.19831	-0.26793	-1.58293	-0.837101	-1.94167	-0.701093	1.05665	-0.258476	-0.397621	1.28885	-0.285007	0.153225	7.83137e-05	0.876222	0.515294	0.00179318	0.989658	NM_030609	RefSeq	Mus musculus histone cluster 1, H1a (Hist1h1a), mRNA.	FALSE	GO:0006334 // GO:0007283	nucleosome assembly // spermatogenesis	GO:0000786 // GO:0005634 // GO:0005694	nucleosome // nucleus // chromosome	GO:0003677	DNA binding	---	---
10408081	287	Hist1h1b	0.0599708	1.45067	0.647458	0.614559	0.558751	-1.26124	-0.840056	-0.244746	-0.768361	-1.65342	1.19876	-0.888201	0.942184	1.26877	1.42985	-0.423203	-1.41302	-1.30798	-1.38642	-0.594999	1.13545	0.351448	-0.0601505	0.757068	0.426874	0.739586	1.17162e-05	0.926878	0.908157	0.00045754	0.994177	NM_020034	RefSeq	Mus musculus histone cluster 1, H1b (Hist1h1b), mRNA.	FALSE	GO:0006334 // GO:0007517	nucleosome assembly // muscle development	GO:0000786 // GO:0005634 // GO:0005694	nucleosome // nucleus // chromosome	GO:0003677 // GO:0005515	DNA binding // protein binding	---	---
10408212	31	Hist1h1e	0.0221152	1.22016	0.351113	0.370941	-0.148752	-2.3629	-0.436421	-0.506068	-0.715275	-2.06116	1.39517	0.564194	-0.387149	0.234518	1.02983	-0.631086	-1.51218	0.0221152	-0.417931	0.0221152	1.67541	0.603299	0.219703	1.34823	0.100005	0.433491	0.000564566	0.161516	0.751389	0.00775871	0.766644	NM_015787	RefSeq	Mus musculus histone cluster 1, H1e (Hist1h1e), mRNA.	FALSE	GO:0006334 // GO:0016584	nucleosome assembly // nucleosome positioning	GO:0000786 // GO:0005634 // GO:0005694	nucleosome // nucleus // chromosome	GO:0003677 // GO:0005515	DNA binding // protein binding	---	---
10404055	1066	Hist1h1t	0.361309	0.277686	0.561839	1.13822	0.371293	-0.25936	-0.994945	-0.715375	-0.773927	-0.793515	1.37042	0.213168	0.895837	1.31783	0.605269	-0.80281	-1.39209	-1.09891	-0.39937	-0.865204	2.66941	0.725564	-1.02421	-0.529924	-0.858205	0.127366	1.30212e-07	0.708457	0.481232	2.01372e-05	0.965689	NM_010377	RefSeq	Mus musculus histone cluster 1, H1t (Hist1h1t), mRNA.	FALSE	GO:0006334 // GO:0007275 // GO:0007283 // GO:0007339 // GO:0030154 // GO:0030317	nucleosome assembly // multicellular organismal development // spermatogenesis // binding of sperm to zona pellucida // cell differentiation // sperm motility	GO:0000786 // GO:0005622 // GO:0005634 // GO:0005694	nucleosome // intracellular // nucleus // chromosome	GO:0003677	DNA binding	---	---
10404127	1142	Hist1h2aa	0.905104	0.821876	1.1929	1.32544	0.9921	-0.912191	-0.713486	-1.5321	-1.40922	-1.16345	0.500492	0.864297	1.53132	0.434874	1.5449	0.411976	-1.64696	-0.390685	-0.278579	-0.724746	0.0527887	-0.486373	-1.02023	0.314756	-0.614808	0.143405	4.35445e-07	0.257655	0.503018	4.73134e-05	0.834398	NM_175658	RefSeq	Mus musculus histone cluster 1, H2aa (Hist1h2aa), mRNA.	FALSE	---	---	GO:0000786 // GO:0005634 // GO:0005694	nucleosome // nucleus // chromosome	GO:0003677	DNA binding	---	---
10408266	1143	Hist1h2ba	0.770909	1.03832	0.98562	1.18879	1.04205	-0.931415	-0.329824	-0.896148	-0.635983	-0.515894	0.395685	0.458719	1.95121	0.866572	1.68887	0.148469	-1.86408	-0.766785	-1.2345	-0.782955	-0.0712472	-0.585237	-0.834419	0.0785033	-1.16523	0.531437	5.47621e-07	0.719682	0.808177	5.5744e-05	0.966737	NM_175663	RefSeq	Mus musculus histone cluster 1, H2ba (Hist1h2ba), mRNA.	FALSE	GO:0006334	nucleosome assembly	GO:0000786 // GO:0005634 // GO:0005694	nucleosome // nucleus // chromosome	GO:0003677	DNA binding	---	---
10494407	17	Hist2h2bb	-0.529535	0.984932	0.776785	0.506077	0.262792	-0.288938	-0.398884	-1.71773	-1.08464	-0.746203	1.74856	-0.539105	1.39643	1.48975	0.751283	0.381871	-1.90499	-0.663995	-1.77523	-0.37619	0.653914	0.762072	-0.248397	0.476425	0.0829457	0.413037	0.000362553	0.44094	0.739165	0.00560916	0.904558	NM_175666	RefSeq	Mus musculus histone cluster 2, H2bb (Hist2h2bb), mRNA.	FALSE	---	---	GO:0000786 // GO:0005634 // GO:0005694	nucleosome // nucleus // chromosome	GO:0003677	DNA binding	---	---
10376455	27	Hist3h2a	0.211259	1.68316	0.395115	0.259832	0.225461	-1.09391	-0.278049	-0.562753	-1.68213	-1.40267	0.900985	0.776097	0.579863	0.477464	1.69969	-0.0804184	-1.34992	-0.941058	-1.02078	-1.16254	0.914502	-0.0290309	-0.587989	1.79689	0.270938	0.634322	2.25218e-06	0.389899	0.862056	0.000141119	0.887072	NM_178218	RefSeq	Mus musculus histone cluster 3, H2a (Hist3h2a), mRNA.	FALSE	GO:0006334	nucleosome assembly	GO:0000786 // GO:0005634 // GO:0005694	nucleosome // nucleus // chromosome	GO:0003677 // GO:0008270 // GO:0046872	DNA binding // zinc ion binding // metal ion binding	---	---
10386236	769	Hist3h2bb	0.588561	1.74782	1.14511	0.60654	-0.340163	-0.413943	-0.223326	-0.31697	-0.882041	-0.852541	0.903033	0.00182616	1.40593	0.198516	1.27458	-0.919782	-2.30434	-0.641063	-1.68569	-0.555843	-0.270514	0.00182616	-0.0482446	1.65028	-0.069556	0.247314	3.16192e-05	0.261789	0.613601	0.000924702	0.834398	NM_206882	RefSeq	Mus musculus histone cluster 3, H2bb (Hist3h2bb), mRNA.	FALSE	GO:0006334	nucleosome assembly	GO:0000786 // GO:0005634 // GO:0005694	nucleosome // nucleus // chromosome	GO:0003677	DNA binding	---	---
10548857	285	Hist4h4	0.0843995	1.69096	0.79982	0.834036	0.361772	-0.459412	-0.0171768	-0.249638	-0.498618	-1.64061	0.751773	-0.78305	1.65623	1.00945	1.35338	-0.533315	-1.52357	-0.719501	-2.31711	-0.703922	0.21135	0.0316201	-0.338877	0.62843	0.371582	0.359655	0.00012568	0.425849	0.701143	0.002525	0.899642	NM_175652	RefSeq	Mus musculus histone cluster 4, H4 (Hist4h4), mRNA.	FALSE	GO:0006334	nucleosome assembly	GO:0000786 // GO:0005634 // GO:0005694	nucleosome // nucleus // chromosome	GO:0003677	DNA binding	---	---
10359801	1159	Mael	0.250183	1.86676	0.937888	0.525232	0.861737	-0.0548329	0.695303	-0.0302303	-1.19898	-0.63328	1.1846	0.630422	1.65883	0.491819	1.61243	-1.2757	-0.980477	-0.613244	-1.23232	-0.432714	-0.809583	-1.09112	-0.89764	-0.264186	-1.2009	0.10186	2.04926e-05	0.433185	0.444937	0.0006831	0.902691	NM_175296	RefSeq	Mus musculus maelstrom homolog (Drosophila) (Mael), mRNA.	FALSE	GO:0000122 // GO:0000902 // GO:0007128 // GO:0007129 // GO:0007140 // GO:0007283 // GO:0009566 // GO:0010629 // GO:0034984 // GO:0043046 // GO:0043066 // GO:0046620	negative regulation of transcription from RNA polymerase II promoter // cell morphogenesis // meiotic prophase I // synapsis // male meiosis // spermatogenesis // fertilization // negative regulation of gene expression // cellular response to DNA damage stimulus // DNA methylation during gametogenesis // negative regulation of apoptosis // regulation of organ growth	GO:0000785 // GO:0005634 // GO:0005737 // GO:0016585 // GO:0030849 // GO:0033391 // GO:0043186 // GO:0048471	chromatin // nucleus // cytoplasm // chromatin remodeling complex // autosome // chromatoid body // P granule // perinuclear region of cytoplasm	GO:0003677 // GO:0005515	DNA binding // protein binding	---	---
10456622	221	Mbd1	0.882269	0.920648	0.10205	0.672475	0.887435	-1.42685	-1.12728	-2.51285	-1.04107	-0.781861	0.56381	1.37677	0.465242	0.675536	1.00418	-0.642526	-0.08939	-0.984996	-0.38568	-1.44196	1.18256	0.71389	0.50433	0.327747	0.155509	0.238408	3.8566e-07	0.0969064	0.604586	4.40488e-05	0.69574	NM_013594	RefSeq	Mus musculus methyl-CpG binding domain protein 1 (Mbd1), mRNA.	FALSE	GO:0006306 // GO:0006350 // GO:0006355	DNA methylation // transcription // regulation of transcription, DNA-dependent	GO:0000785 // GO:0000792 // GO:0005634 // GO:0005730 // GO:0005737	chromatin // heterochromatin // nucleus // nucleolus // cytoplasm	GO:0003677 // GO:0008270 // GO:0046872	DNA binding // zinc ion binding // metal ion binding	---	---
10547088	500	Mbd4	-0.0796712	0.415339	0.727707	0.594465	-0.0847989	-0.856053	0.315178	-0.638961	-0.561136	-1.02171	1.43565	0.0896159	0.853003	0.374551	1.30802	-1.28505	-2.2737	-1.13977	-1.11932	-1.22221	1.28942	0.714682	0.266419	1.57	0.32832	0.00773244	2.61789e-05	0.517773	0.215183	0.000805275	0.925715	NM_010774	RefSeq	Mus musculus methyl-CpG binding domain protein 4 (Mbd4), mRNA.	FALSE	GO:0006281 // GO:0006284 // GO:0006306 // GO:0006974 // GO:0008630 // GO:0009314	DNA repair // base-excision repair // DNA methylation // response to DNA damage stimulus // DNA damage response, signal transduction resulting in induction of apoptosis // response to radiation	GO:0000785 // GO:0005634 // GO:0005737	chromatin // nucleus // cytoplasm	GO:0003677 // GO:0016787	DNA binding // hydrolase activity	---	---
10378024	486	Mis12	-0.0106545	0.966901	0.246213	0.892488	1.25774	-2.34902	-1.20649	-1.47398	-0.558375	-0.507086	1.81424	0.0315605	0.555463	-0.472659	0.653281	-0.29019	-1.07831	-0.407639	-0.995711	-0.722015	1.20001	1.08228	0.0373672	1.00678	0.327798	0.264898	6.28612e-05	0.542799	0.627189	0.00152608	0.933195	NM_025993	RefSeq	Mus musculus MIS12 homolog (yeast) (Mis12), mRNA.	FALSE	GO:0007049 // GO:0007059 // GO:0007067 // GO:0051301	cell cycle // chromosome segregation // mitosis // cell division	GO:0000775 // GO:0005634	chromosome, centromeric region // nucleus	---	---	---	---
10500911	1990	Mov10	-0.969941	-0.578671	-0.122879	-0.726148	-0.485062	1.17375	1.36426	1.56335	0.58678	0.257555	-1.26374	-2.16551	0.530057	-0.787896	-0.12815	-0.314784	-0.0038233	0.943239	0.632106	1.62558	0.934597	-0.410461	-0.549589	-1.70632	0.601707	0.729416	0.000232733	0.351682	0.90293	0.00402133	0.875518	NM_008619	RefSeq	Mus musculus Moloney leukemia virus 10 (Mov10), mRNA.	FALSE	GO:0007275	multicellular organismal development	---	---	GO:0000166 // GO:0004386 // GO:0005524 // GO:0016787 // GO:0017111	nucleotide binding // helicase activity // ATP binding // hydrolase activity // nucleoside-triphosphatase activity	---	---
10570875	1975	Myst3	-0.544449	-2.01001	-0.866748	0.127445	-0.158481	0.589285	0.302128	1.61841	0.96354	1.84504	-0.587475	-0.484598	-0.0059386	-0.251997	-1.55409	-0.125914	0.824388	1.17049	0.300128	1.49363	0.540952	0.0946659	-1.12074	-1.34957	-0.81009	0.480365	9.90128e-05	0.724425	0.777936	0.00212581	0.968152	NM_001081149	RefSeq	Mus musculus MYST histone acetyltransferase (monocytic leukemia) 3 (Myst3), mRNA.	FALSE	GO:0006334 // GO:0006350 // GO:0006355 // GO:0016568 // GO:0035019 // GO:0035162 // GO:0045449	nucleosome assembly // transcription // regulation of transcription, DNA-dependent // chromatin modification // somatic stem cell maintenance // embryonic hemopoiesis // regulation of transcription	GO:0000786 // GO:0005634	nucleosome // nucleus	GO:0003677 // GO:0004402 // GO:0005515 // GO:0008270 // GO:0008415 // GO:0016740 // GO:0016747 // GO:0046872	DNA binding // histone acetyltransferase activity // protein binding // zinc ion binding // acyltransferase activity // transferase activity // transferase activity, transferring acyl groups other than amino-acyl groups // metal ion binding	---	---
10547943	503	Ncapd2	-0.840986	0.409013	0.33972	-0.470201	0.0406661	-0.198293	-0.470076	-0.359998	-1.18023	-1.24641	1.53079	0.0708818	0.753672	0.436203	1.55682	-0.421098	-2.07701	-0.868441	-0.873838	-1.08823	1.63484	0.890539	0.00879079	1.61535	0.807517	0.0192298	0.000595199	0.331699	0.26821	0.00808395	0.867002	NM_146171	RefSeq	Mus musculus non-SMC condensin I complex, subunit D2 (Ncapd2), mRNA.	FALSE	GO:0007049 // GO:0007067 // GO:0007076 // GO:0030261 // GO:0051301	cell cycle // mitosis // mitotic chromosome condensation // chromosome condensation // cell division	GO:0000793 // GO:0000793 // GO:0005634 // GO:0005737 // GO:0045120	condensed chromosome // condensed chromosome // nucleus // cytoplasm // pronucleus	---	---	---	---
10426225	387	Ncaph2	-0.457351	0.72136	0.883024	-0.0743072	0.244446	-1.01927	-0.187193	-0.116423	-0.726229	-0.97832	1.38757	-0.479669	1.37929	0.91613	1.47168	-0.983251	-1.49663	-1.17221	-1.26653	-1.33218	1.89364	0.0485253	0.133759	1.10133	0.108809	0.0162374	5.49249e-05	0.963089	0.255318	0.001388	0.997768	NM_001115132	RefSeq	Mus musculus non-SMC condensin II complex, subunit H2 (Ncaph2), transcript variant 1, mRNA.	FALSE	GO:0007076 // GO:0033077	mitotic chromosome condensation // T cell differentiation in the thymus	GO:0005634	nucleus	---	---	---	---
10590933	2152	Piwil4	-1.0537	0.777091	-1.68178	-0.961592	-0.670704	0.792307	1.815	1.0597	1.4448	0.609528	-0.325352	-0.79607	-0.823904	-1.24207	-0.950672	0.526783	1.38731	0.843941	0.648908	1.1889	0.0141635	-0.235255	-0.718989	-0.955001	-0.693336	0.824488	1.37565e-06	0.510991	0.940051	0.000100022	0.92257	NM_177905	RefSeq	Mus musculus piwi-like homolog 4 (Drosophila) (Piwil4), mRNA.	FALSE	GO:0007275	multicellular organismal development	---	---	---	---	---	---
10507699	469	Scmh1	-0.0448822	-0.0241584	0.37517	0.397478	0.251927	-1.00175	-1.24605	-0.486497	-1.27695	-0.355568	-0.0565824	0.0466722	0.351804	0.0421373	0.446964	-0.560355	-0.689675	-0.483074	-0.401737	-1.05711	0.430266	0.587357	3.36951	-0.650911	2.03602	0.336365	1.68026e-06	0.433859	0.684905	0.000115355	0.902932	NM_013883	RefSeq	Mus musculus sex comb on midleg homolog 1 (Scmh1), mRNA.	FALSE	GO:0006350 // GO:0006355 // GO:0007275 // GO:0016481 // GO:0045449	transcription // regulation of transcription, DNA-dependent // multicellular organismal development // negative regulation of transcription // regulation of transcription	GO:0005634	nucleus	GO:0005515 // GO:0016564	protein binding // transcription repressor activity	---	---
10371256	1727	Sirt6	-0.0815343	-0.892937	0.359407	0.208345	0.475642	0.40091	0.529494	1.48501	1.17705	1.78408	-1.41639	-0.536072	-0.366553	-1.31006	-1.52278	0.836204	0.513277	0.973143	0.928277	0.653015	-0.480721	-0.580799	-0.369999	-2.21694	-0.549073	0.110602	1.07631e-05	0.0107465	0.458136	0.00043206	0.443482	NM_181586	RefSeq	Mus musculus sirtuin 6 (silent mating type information regulation 2, homolog) 6 (S. cerevisiae) (Sirt6), mRNA.	FALSE	GO:0006342 // GO:0006355 // GO:0006471 // GO:0006476	chromatin silencing // regulation of transcription, DNA-dependent // protein amino acid ADP-ribosylation // protein amino acid deacetylation	GO:0005634 // GO:0005677	nucleus // chromatin silencing complex	GO:0003677 // GO:0003956 // GO:0008270 // GO:0016740 // GO:0016757 // GO:0017136 // GO:0046872 // GO:0051287	DNA binding // NAD(P)+-protein-arginine ADP-ribosyltransferase activity // zinc ion binding // transferase activity // transferase activity, transferring glycosyl groups // NAD-dependent histone deacetylase activity // metal ion binding // NAD binding	---	---
10393866	1576	Sirt7	-0.799484	-0.0940857	0.0783011	-0.310729	-0.0265835	0.728697	1.04235	2.59035	1.11845	-0.153961	-0.140065	0.324351	-0.615599	-0.999857	-0.332182	0.140457	0.834295	1.30719	0.862569	0.12816	-0.800392	-1.92108	-0.640505	-2.00105	-0.319598	0.618375	0.000674869	0.350805	0.853455	0.00881855	0.874765	NM_153056	RefSeq	Mus musculus sirtuin 7 (silent mating type information regulation 2, homolog) 7 (S. cerevisiae) (Sirt7), mRNA.	FALSE	GO:0006342 // GO:0006355 // GO:0006476	chromatin silencing // regulation of transcription, DNA-dependent // protein amino acid deacetylation	GO:0005677 // GO:0005737	chromatin silencing complex // cytoplasm	GO:0003677 // GO:0008270 // GO:0016787 // GO:0017136 // GO:0046872 // GO:0051287	DNA binding // zinc ion binding // hydrolase activity // NAD-dependent histone deacetylase activity // metal ion binding // NAD binding	---	---
10589466	1378	Smarcc1	-1.32056	-0.0285325	0.0724644	-1.85343	-0.824882	0.663552	0.558566	1.52247	0.413185	0.172333	-0.181986	-1.06843	-1.5573	-1.46234	-1.50595	0.0103551	0.23766	0.789103	-0.156544	1.49686	0.600715	1.08861	1.16157	0.179605	0.992902	0.771871	4.89367e-05	0.346488	0.918466	0.00127567	0.872429	NM_009211	RefSeq	Mus musculus SWI/SNF related, matrix associated, actin dependent regulator of chromatin, subfamily c, member 1 (Smarcc1), mRNA.	FALSE	GO:0006323 // GO:0006333 // GO:0006350 // GO:0006355 // GO:0009887 // GO:0016568	DNA packaging // chromatin assembly or disassembly // transcription // regulation of transcription, DNA-dependent // organ morphogenesis // chromatin modification	GO:0000785 // GO:0005622 // GO:0005634 // GO:0016514	chromatin // intracellular // nucleus // SWI/SNF complex	GO:0003677 // GO:0003682 // GO:0005515	DNA binding // chromatin binding // protein binding	---	---
10452701	603	Smchd1	0.509076	0.244517	0.360909	0.540158	0.768686	-0.594283	0.052458	-0.301181	-1.4487	-1.93412	-0.208601	0.677011	0.593397	-0.0683384	0.33969	-1.09941	-1.5549	-0.234071	-0.754266	-1.71392	1.57839	1.0596	0.628739	1.96379	0.595362	0.987183	3.64889e-05	0.369794	0.996734	0.001016	0.88094	NM_028887	RefSeq	Mus musculus SMC hinge domain containing 1 (Smchd1), mRNA.	FALSE	GO:0051276	chromosome organization	GO:0005694	chromosome	GO:0005515 // GO:0005524	protein binding // ATP binding	---	---
10537231	1193	Stra8	0.778481	-0.151458	0.748537	0.797536	0.677414	-1.06489	-0.769015	-1.05978	-0.852086	0.40739	1.86762	-0.73414	1.20914	1.4548	1.78076	-0.741403	-1.37143	-0.884232	-0.36359	-1.30745	1.05986	0.0951524	-0.867876	-0.416223	-0.293134	0.201434	6.155e-05	0.659164	0.568034	0.00149789	0.954978	NM_009292	RefSeq	Mus musculus stimulated by retinoic acid gene 8 (Stra8), mRNA.	FALSE	GO:0001541 // GO:0006260 // GO:0007066 // GO:0007126 // GO:0007129 // GO:0007131 // GO:0007283 // GO:0009566 // GO:0010032 // GO:0033315 // GO:0042138 // GO:0046620 // GO:0048599	ovarian follicle development // DNA replication // female meiosis sister chromatid cohesion // meiosis // synapsis // reciprocal meiotic recombination // spermatogenesis // fertilization // meiotic chromosome condensation // meiotic cell cycle DNA replication checkpoint // meiotic DNA double-strand break formation // regulation of organ growth // oocyte development	GO:0005737	cytoplasm	---	---	---	---
10603431	87	Suv39h1	0.854967	0.276934	1.14503	1.05627	0.532001	-0.0823595	0.224832	-1.14314	-2.11078	-2.19184	0.506403	1.37639	0.796995	-0.0901601	1.55634	-0.176581	-1.43117	-0.501129	-0.123835	-1.12956	-0.320046	0.537302	0.172937	0.663448	-0.39925	0.620864	7.51095e-05	0.499327	0.855216	0.00173349	0.920525	NM_011514	RefSeq	Mus musculus suppressor of variegation 3-9 homolog 1 (Drosophila) (Suv39h1), mRNA.	FALSE	GO:0006323 // GO:0006333 // GO:0006342 // GO:0006350 // GO:0006355 // GO:0007049 // GO:0016568 // GO:0030154 // GO:0051567	DNA packaging // chromatin assembly or disassembly // chromatin silencing // transcription // regulation of transcription, DNA-dependent // cell cycle // chromatin modification // cell differentiation // histone H3-K9 methylation	GO:0000775 // GO:0000785 // GO:0005634 // GO:0005677 // GO:0005694 // GO:0005720	chromosome, centromeric region // chromatin // nucleus // chromatin silencing complex // chromosome // nuclear heterochromatin	GO:0003682 // GO:0005515 // GO:0008168 // GO:0008270 // GO:0008276 // GO:0016740 // GO:0018024	chromatin binding // protein binding // methyltransferase activity // zinc ion binding // protein methyltransferase activity // transferase activity // histone-lysine N-methyltransferase activity	---	---
10557233	436	Tnrc6a	0.190952	0.804889	1.0025	1.28863	0.754211	-1.7778	-1.47523	-0.949486	-1.73504	-1.61256	0.890072	1.36107	0.300155	0.553852	0.0431014	-0.508126	-1.11928	-0.190868	-0.352366	-0.545167	0.990797	1.0763	0.631721	0.740855	-0.36318	0.00628023	5.46713e-07	0.0975694	0.206646	5.5744e-05	0.697017	NM_144925	RefSeq	Mus musculus trinucleotide repeat containing 6a (Tnrc6a), mRNA.	FALSE	GO:0009267 // GO:0032507	cellular response to starvation // maintenance of protein location in cell	GO:0000932 // GO:0048471	cytoplasmic mRNA processing body // perinuclear region of cytoplasm	GO:0032947	protein complex scaffold	---	---
10480224	60	Trdmt1	0.779757	1.28031	0.689259	-0.00852381	0.733554	-0.21279	-0.641914	0.0251649	-0.241331	-0.46107	0.405556	-0.440066	0.780178	-1.01166	1.1542	-1.59246	-1.94343	0.0116639	-0.851736	-1.89739	1.42786	0.450004	1.92025	-0.347991	-0.00739731	0.47794	0.000655086	0.0226898	0.776751	0.00866212	0.511066	NM_010067	RefSeq	Mus musculus tRNA aspartic acid methyltransferase 1 (Trdmt1), mRNA.	FALSE	GO:0006306 // GO:0008033	DNA methylation // tRNA processing	GO:0005634	nucleus	GO:0003677 // GO:0003723 // GO:0008168 // GO:0016428 // GO:0016740	DNA binding // RNA binding // methyltransferase activity // tRNA (cytosine-5-)-methyltransferase activity // transferase activity	---	---
